# Supplementary material for: Does filter-aided sample preparation provide sufficient method linearity for quantitative plant shotgun proteomics?
Source: Front Plant Sci. 2022 Nov 23;13:874761. doi: 10.3389/fpls.2022.874761 (PMC9728026; doi:10.3389/fpls.2022.874761)
Supplement: Supplementary file 2 [file DataSheet_2.xlsx]

## Sheet: Directory
	Does filter aided sample preparation (FASP) provide sufficient method linearity for quantitative plant shotgun proteomics?
	Tatiana Leonova,1,2 Christian Ihling,3 Mohamad Saoud,1 Nadezhda Frolova,1,2 Robert Rennert,1 Ludger A. Wessjohann,1 Andrej Frolov1,2*
	1Leibniz Institute of Plant Biochemistry, Department of Bioorganic Chemistry, Halle (Saale), Germany
	2St Petersburg State University, St Petersburg, Russia
	3Martin-Luther Universität Halle-Wittenberg, Institute of Pharmacy, Department of Pharmaceutical Chemistry and Bioanalytics, Halle (Saale), Germany
	Supplementary Table S2-1. List of identified BSA peptides in the spike-in experiment of BSA and pea seed protein acquired with DDA mode.
	Supplementary Tablу S2-2. List of Arabidopsis thaliana proteins identified in the experiment after protein isolation with detergent treatment
	Supplementary Tablу S2-3. List of Arabidopsis thaliana proteins identified in the experiment after protein isolation with phenol

## Sheet: Table S2-1
Table S2-1. List of identified BSA peptides in the spike-in experiment of BSA and pea seed protein acquired with DDA mode.
Annotated Sequence	Theo. MH+ [Da]	Modifications	Retention Time [min]	# Missed Cleavages	Qvality PEP	Qvality q-value	# Peptide Spectrum Matches (PSMs)	# Razor Quan Results	XCorr (by Search Engine): Sequest HT	Confidence (by Search Engine): Sequest HT	Percolator q-Value (by Search Engine): Sequest HT	Percolator PEP (by Search Engine): Sequest HT	Abundances (Grouped)						Abundances (Grouped) CV [%]
													15 pmol BSA load	7.5 pmol BSA load	3.76 pmol BSA load	1.88 pmol BSA load	0.94 pmol BSA load	0.47 pmol BSA load	15 pmol BSA load	7.5 pmol BSA load	3.76 pmol BSA load	1.88 pmol BSA load	0.94 pmol BSA load	0.47 pmol BSA load
[K].AEFVEVTK.[L]	922.488		58.01	0	0.0151396	0	107	1	2.66	High	0	0.0005976	220.1	159.7	86.9	62.5	41.9	28.8	28.07	10.57	8.41	10.14	14.58	10.05
[K].AEFVEVTKLVTDLTK.[V]	1692.94		104.45	1	2.72689e-05	0	8	0	4.58	High	0	5.514e-07	463.9				136.1
[K].AFDEKLFTFHADICTLPDTEK.[Q]	2498.19	1xCarbamidomethyl [C14]	91.28	1	0.00196637	0	1	0	2.9	High	0	1.086e-05	382.4	217.6						74.72
[K].ATEEQLKTVMENFVAFVDK.[C]	2199.1		120.76	1	0.000115176	0	7	0	4.64	High	0	6.089e-06	169.2	237.4	114.6	78.7			69.45	34.37	76.3	41.34
[K].CCAADDKEACFAVEGPK.[L]	1927.8	3xCarbamidomethyl [C1; C2; C10]	58.51	1	5.07716e-07	0	89	0	5.7	High	0	7.837e-09	179.6	136	112.8	91.6	45.4	34.5	4.81	8.09	15.61	16.07	9.75	7.31
[K].CCTESLVNR.[R]	1138.5	2xCarbamidomethyl [C1; C2]	48.06	0	0.0016861	0	65	0	3.38	High	0	3.952e-05	183.7	140.8	152	69.6	32.1	21.7	19.65	8.64	48.63	21.1	3.96	10.54
[K].DAFLGSFLYEYSR.[R]	1567.74		108.87	0	0.000135171	0	149	0	4.52	High	0	2.265e-06	156.9	163.4	83.9	86	63.2	46.6	31.17	30.2	41.9	19.51	19.93	35.28
[K].DAIPENLPPLTADFAEDK.[D]	1955.96		97.25	0	8.56969e-06	0	21	0	3.64	High	0	7.989e-08	337.9	115.1	70.7	31.4	36.7	8.3	25.7	48.88	82.65	32.18	16.14	9.57
[K].DAIPENLPPLTADFAEDKDVCK.[N]	2458.18	1xCarbamidomethyl [C21]	91.51	1	0.00150011	0	44	0	4.82	High	0	7.437e-05	224.8	150.6	121	46.4	40.9	16.4	15.77	5.14	5.68	26.86	7.17	15.03
[K].DDPHACYSTVFDK.[L]	1554.65	1xCarbamidomethyl [C6]	64.02	0	3.61966e-05	0	149	0	3.07	High	0	5.077e-05	220.1	144.1	96.5	71.5	41.9	25.9	3.3	2.86	4.83	8.73	12.94	2.7
[K].DDPHACYSTVFDKLK.[H]	1795.83	1xCarbamidomethyl [C6]	74.58	1	0.00179307	0	9	0	2.64	High	0	9.365e-06	189	221.7	77.9	54.2	57.2		46.61	26.71	51.81	49.67	48.82
[K].DDSPDLPK.[L]	886.415		49.04	0	0.157259	0.0048174	2	0	1.93	High	0.003806	0.09669	309.5	108.6	83.5	63.7	34.7		17.43	9.23		22.11
[K].DLGEEHFK.[G]	974.458		50.11	0	0.0374526	0	41	0	2.29	High	0.0001632	0.006252	94.7	108.4	173.1	126	56.9	40.8	34.97	31.73	26.79	47.34	50.28	38.74
[K].EACFAVEGPK.[L]	1107.51	1xCarbamidomethyl [C3]	60.09	0	0.0168915	0	16	0	2.82	High	0	0.002509	253.4	159.4	92.7	47.9	28.1	18.5	10.8	11.92	14.97	19.62	12.19	21.92
[K].ECCDKPLLEK.[S]	1291.6	2xCarbamidomethyl [C2; C3]	47.53	0	0.00787613	0	55	0	2.56	High	0.0006128	0.01817	214.2	144.1	135	59.9	30.7	16.1	29.24	16.29	25.26	24.01	28.09	19
[K].ECCHGDLLECADDR.[A]	1749.66	3xCarbamidomethyl [C2; C3; C10]	57.16	0	0.000159616	0	56	0	4.17	High	0	4.216e-07	274.8	135	89.7	54.8	26.7	19	2.81	8.77	2.38	24.39	12.5	17.26
[K].ECCHGDLLECADDRADLAK.[Y]	2247.94	3xCarbamidomethyl [C2; C3; C10]	63.44	1	1.03719e-05	0	88	0	5.33	High	0	7.095e-08	228.8	148.1	88.4	74.5	36.3	23.9	19.36	13.39	27.46	8.62	23.32	2.88
[K].EYEATLEECCAK.[D]	1502.61	2xCarbamidomethyl [C9; C10]	55.26	0	0.000116603	0	108	0	4.27	High	0	3.041e-07	207.8	145.4	110.4	72.4	39.9	24.1	3.33	2.73	3.9	15.02	12.61	11.34
[K].EYEATLEECCAKDDPHACYSTVFDK.[L]	3038.25	3xCarbamidomethyl [C9; C10; C18]	70.65	1	3.64202e-05	0	4	0	5.01	High	0	1.522e-08	250	187.6	162.5				54.84	34.71
[K].EYEATLEECCAKDDPHACYSTVFDKLK.[H]	3279.43	3xCarbamidomethyl [C9; C10; C18]	76.47	2	0.198007	0.0081743	1	0	2.03	High	0.001026	0.02725	412	188
[K].GACLLPK.[I]	758.423	1xCarbamidomethyl [C3]	57.89	0	0.152293	0.00429532	42	0	2.27	High	0.003677	0.0908	168.8	157.8	130.1	78.3	39.7	25.3	32.26	17.41	10.1	13.99	17.03	12.55
[K].GLVLIAFSQYLQQCPFDEHVK.[L]	2492.26	1xCarbamidomethyl [C14]	115.04	0	9.81146e-07	0	101	0	5.7	High	0	4.782e-10	233.1	129.2	75	87.1	59.8	15.8	27.03	57.86	55.7	41.81	43.59	6.02
[K].HKPKATEEQLK.[T]	1308.73		37.16	1	0.0784879	0.000860698	2	0	2.47	High	7.126e-05	0.005211	407.9	192.1					15.16
[K].HLVDEPQNLIK.[Q]	1305.72		65.05	0	0.0031183	0	279	0	3.34	High	0	9.992e-05	175.4	153.2	112.5	73.1	49.1	36.7	1.48	16.32	34.64	10.41	13.43	18.6
[K].KQTALVELLK.[H]	1142.71		75.35	1	0.000156695	0	75	0	4.06	High	0	3.461e-06	204.6	129	90	85.3	61.9	29.2	10.02	18.46	11	17.37	8.7	35.84
[K].LFTFHADICTLPDTEK.[Q]	1907.92	1xCarbamidomethyl [C9]	85.75	0	4.95431e-06	0	239	0	5.26	High	0	2.73e-09	228.1	163.9	95.4	59.8	32.9	19.9	18.1	5.25	38	14.97	34.5	0.14
[K].LGEYGFQNALIVR.[Y]	1479.8		89.59	0	3.89722e-05	0	255	0	4.79	High	0	1.863e-08	166.6	144.1	116.6	77.1	58.6	37	10.61	10.43	20.09	15.02	13.59	26.4
[K].LGEYGFQNALIVRYTR.[K]	1900.01			1	0.0048228	0	3	0	2.34	High	4.762e-05	0.00491
[K].LKECCDKPLLEK.[S]	1532.78	2xCarbamidomethyl [C4; C5]	47.16	1	0.000132697	0	157	0	4.41	High	0	2.517e-05	307.5	107	80.7	56.7	30.1	18	18.98	7.86	18.86	5.59	24.72	8.06
[K].LKHLVDEPQNLIK.[Q]	1546.9		62.84	1	9.2279e-05	0	4	0	4.99	High	0	2.568e-07	249.7	185.7	89.9	74.6			26.07	27.29	41.17
[K].LKPDPNTLCDEFK.[A]	1576.77	1xCarbamidomethyl [C9]	69.6	0	0.000191995	0	114	0	3.78	High	0	4.847e-06	263.9	139.9	80.4	60.6	36	19.2	6.22	17.61	10.49	14.5	8.98	29.8
[K].LKPDPNTLCDEFKADEK.[K]	2019.97	1xCarbamidomethyl [C9]	68.67	1	0.0001271	0	75	0	3.47	High	0	2.423e-07	217.9	153.3	93.3	72.6	41.4	21.5	14.02	9.86	14.72	17.48	17.66	19.93
[K].LKPDPNTLCDEFKADEKK.[F]	2148.06	1xCarbamidomethyl [C9]	65.81	2	0.00187196	0	32	0	3.23	High	0	1.002e-05	164.2	206	97.2	68.8	49.5	14.4	46.71	20.52	28.14	58.49	39.03	2.05
[K].LVNELTEFAK.[T]	1163.63		79.18	0	0.00245361	0	295	0	3.79	High	0	4.2e-05	157.7	152.5	122.5	79.1	54.3	34	34.27	9.59	23.55	18.46	7.1	11.9
[K].LVNELTEFAKTCVADESHAGCEK.[S]	2608.2	2xCarbamidomethyl [C12; C21]	81.99	1	9.69269e-06	0	5	0	4.7	High	0	1.703e-09	375.3	162.9		61.8			25.14	24.5
[K].LVTDLTK.[V]	789.472		54.62	0	0.10427	0.00195131	39	0	2.26	High	0.0001836	0.008582	201.2	131.6	98.6	87.8	52.2	28.6	6.86	12.81	13.85	9.64	8.81	2.57
[K].LVVSTQTALA.[-]	1002.58		73.52	0	0.0357043	0	15	0	2.78	High	0.004999	0.1238	185.9	125.7	86.4	111	55.5	35.5	17.34	10.31	38.73	21.98	44.01	3.74
[K].QEPERNECFLSHK.[D]	1673.77	1xCarbamidomethyl [C8]	47.44	1	0.00416208	0	61	0	3.08	High	0	0.001502	260.8	143.6	97.4	56	26.4	15.9	17.24	13.68	3.89	2.96	18.33	6.61
[K].QEPERNECFLSHKDDSPDLPK.[L]	2541.17	1xCarbamidomethyl [C8]	57.31	2	8.78439e-05	0	73	0	4.9	High	0	3.858e-07	186.4	141.9	101.5	98	46.2	26.1	15.85	14.03	40.09	26.16	26.42	10.84
[K].QTALVELLK.[H]	1014.62		87.54	0	0.0336298	0	102	0	2.17	High	0	0.00278	194.8	138.5	112.5	70	55.6	28.6	7.69	21.04	1.72	27.52	14.97	9.36
[K].SHCIAEVEK.[D]	1072.51	1xCarbamidomethyl [C3]	42.93	0	0.046121	0	3	0	2.65	High	0	0.002081	199.6	62.3	91.8		246.3		27.39
[K].SHCIAEVEKDAIPENLPPLTADFAEDK.[D]	3009.45	1xCarbamidomethyl [C3]	90.12	1	3.2192e-07	0	25	0	5.31	High	0	1.419e-11	270.2	158	90.8	57.7	19.9	3.5	35.66	7.95	9.62	48.15	42.49
[K].SHCIAEVEKDAIPENLPPLTADFAEDKDVCK.[N]	3511.67	2xCarbamidomethyl [C3; C30]	86.12	2	1.9915e-07	0	112	0	6.63	High	0	2.83e-12	168.3	131.4	126	90.3	51.9	32	16.31	14.31	4	36.07	22.51	40.25
[K].SLHTLFGDELCK.[V]	1419.69	1xCarbamidomethyl [C11]	77.76	0	5.36784e-05	0	284	0	5	High	0	6.966e-06	196.2	151.1	107.4	61.5	57.9	25.8	30.92	13.17	9.21	26.07	15.74	35.63
[K].SLHTLFGDELCKVASLR.[E]	1946.02	1xCarbamidomethyl [C11]	94.94	1	1.75042e-05	0	6	0	4.22	High	0	2.096e-08	332.3	188		38.2	41.5		25.49			0.69
[K].TCVADESHAGCEK.[S]	1463.59	2xCarbamidomethyl [C2; C11]	38.25	0	0.000140257	0	8	0	4.21	High	0	6.003e-07	174.8	120.6	132.1	124	48.5		15.85	26.28	11.76	62.38	65.17
[K].TVMENFVAFVDK.[C]	1415.69	1xOxidation [M3]	86.93	0	0.000495481	0	138	0	4.1	High	0	7.602e-06	235.7	133.1	93	74	45.8	18.3	24.14	6.03	0.21	5.86	25.67	8.76
[K].TVMENFVAFVDK.[C]	1399.69		100.63	0	0.000326008	0	169	0	4.29	High	0	3.645e-06	171.3	151.4	116.7	78.6	56.2	25.8	52.14	30.16	7.99	19.63	35.68	4.06
[K].TVMENFVAFVDKCCAADDKEACFAVEGPK.[L]	3308.47	3xCarbamidomethyl [C13; C14; C22]	98.25	2	2.95412e-05	0	4	0	2.41	High	0	1.077e-08	267.7	116.2	150.2	65.9			87.43	121.05	100.26	6.33
[K].VHKECCHGDLLECADDR.[A]	2113.88	3xCarbamidomethyl [C5; C6; C13]	49.3	1	3.77859e-06	0	33	0	6.21	High	0	1.015e-09	147.7	202.9	121.2	64.1	52.4	11.7	39.15	27.72	23.27	80.17	48.92	15.59
[K].VHKECCHGDLLECADDRADLAK.[Y]	2612.17	3xCarbamidomethyl [C5; C6; C13]	56.28	2	3.10287e-06	0	41	0	5.24	High	0	4.529e-10	175.8	190.9	121.3	59.6	38.1	14.3	49.25	39.84	36.09	71.22	35.2	6.42
[K].VPQVSTPTLVEVSR.[S]	1511.84		76.76	0	0.000124774	0	44	0	4.01	High	0	1.15e-07	231.1	156	110.9	52.4	33.7	15.9	11.74	6.13	3.79	10.28	9.81	6.37
[K].VTKCCTESLVNR.[R]	1466.71	2xCarbamidomethyl [C4; C5]	46.74	1	0.00120949	0	5	0	3.35	High	0	0.0001341	352.4	135.8	71.2	26.1	14.5		6.74	35.07	53.01	0.38
[K].YICDNQDTISSK.[L]	1443.64	1xCarbamidomethyl [C3]	48.29	0	0.000180531	0	152	0	4.37	High	0	6.885e-07	210.9	140.4	113.6	75	39	21.1	14.06	9.07	3.26	8.18	9.2	9.99
[K].YICDNQDTISSKLK.[E]	1684.82	1xCarbamidomethyl [C3]	56.1	1	0.000202933	0	6	0	4.54	High	0	2.564e-07	343.6	256.4					17.21	12.59
[K].YLYEIAR.[R]	927.493		67.42	0	0.0277481	0	211	0	2.57	High	0.0008417	0.02328	229.9	157.7	79.7	59.4	41.8	31.5	23.73	3.41	6.82	13.01	3.6	9.74
[K].YNGVFQECCQAEDK.[G]	1747.71	2xCarbamidomethyl [C8; C9]	59.61	0	1.01196e-05	0	77	0	5.17	High	0	2.684e-08	211	148.7	107.3	74.5	37	21.6	1.09	10.29	9.85	3.04	25.21	11.35
[K].YNGVFQECCQAEDKGACLLPK.[I]	2487.11	3xCarbamidomethyl [C8; C9; C17]	75.77	1	8.46581e-05	0	20	0	4.39	High	0	5.371e-06	152.6	232.1	99.6	76.9	31	7.8	59.38	50.91	38.35	65.48	41.99	20.47
[R].CCTKPESER.[M]	1166.49	2xCarbamidomethyl [C1; C2]	50.64	0	0.109045	0.00274372	2	0	1.77	High	0.000273	0.009261	416.2	183.8					25.85	32.61
[R].CCTKPESERMPCTEDYLSLILNR.[L]	2872.31	3xCarbamidomethyl [C1; C2; C12]	96.66	1	2.56406e-05	0	1	0	4.29	High	0	8.472e-09	457	143
[R].ETYGDMADCCEK.[Q]	1478.52	2xCarbamidomethyl [C9; C10]	49.74	0	0.000254848	0	37	0	3.71	High	0	4.927e-06	217.7	148.7	109.9	64.6	38.5	20.7	5.4	6.91	0.1	3.09	47.82	4.27
[R].ETYGDMADCCEK.[Q]	1494.52	2xCarbamidomethyl [C9; C10]; 1xOxidation [M6]	41.04	0	0.000504716	0	44	0	3.83	High	0	1.465e-05	271.1	114	93.6	66	33.7	21.6	12.02	33.35	5.4	19.17	25.58	3.46
[R].ETYGDMADCCEKQEPER.[N]	2117.82	2xCarbamidomethyl [C9; C10]	50.25	1	0.000121738	0	11	0	3.29	High	0	1.813e-06	176.1	214.8	78	93.8	37.3		55.58	51.61	71.54	66.24
[R].ETYGDMADCCEKQEPER.[N]	2133.82	2xCarbamidomethyl [C9; C10]; 1xOxidation [M6]	42.33	1	0.00108936	0	20	0	3.11	High	0	0.001649	173.3	219.1	102.3	66.7	38.5		51.25	51.88	61.13	63.27	25.53
[R].ETYGDMADCCEKQEPERNECFLSHK.[D]	3149.27	3xCarbamidomethyl [C9; C10; C20]; 1xOxidation [M6]	53.75	2	0.0156074	0	4	0	2.44	High	0	0.002114	99.6	189.6	87.4	153.9	69.5		64.81	45.85	52.36
[R].ETYGDMADCCEKQEPERNECFLSHK.[D]	3133.28	3xCarbamidomethyl [C9; C10; C20]	59.73	2	0.0303685	0	3	0	1.88	High	0.001754	0.04497	204	178.7	110	107.3				98.78	37.1	114.77
[R].FKDLGEEHFK.[G]	1249.62		53.21	1	9.51639e-05	0	187	0	4.32	High	0	5.01e-06	220.2	141.9	103.7	75.8	36.2	22.3	11.06	13.61	7.07	18.67	11.44	4.32
[R].HPEYAVSVLLR.[L]	1283.71		78.05	0	0.000241112	0	88	0	3.95	High	0	4.705e-06	271	139.5	92.1	54.5	26.8	16	23.69	24.68	3.46	22.27	26.97	6.63
[R].HPEYAVSVLLRLAK.[E]	1595.93		93.17	1	0.0173072	0	1	0	2.64	High	0	0.0003986	600						35.84
[R].HPYFYAPELLYYANK.[Y]	1888.93		95.85	0	4.38087e-05	0	250	0	4.63	High	0	1.804e-05	236.3	132.2	93.5	71.1	42.8	24.1	8.37	5.58	9.71	9.52	15.64	8.38
[R].KVPQVSTPTLVEVSR.[S]	1639.94		70.28	1	2.50168e-05	0	190	0	4.73	High	0	4.83e-08	183.8	151.3	87.3	95.9	54.2	27.5	7.39	12.55	9.78	5.1	24.76	11.86
[R].KVPQVSTPTLVEVSRSLGK.[V]	2025.17		80.58	2	0.000520492	0	1	0	2.43	High	0	1.219e-06	600						73.1
[R].LAKEYEATLEECCAK.[D]	1814.83	2xCarbamidomethyl [C12; C13]	58.92	1	0.0014193	0	2	0	4.14	High	0	6.391e-06	137.4	200.7	141.5	120.4			61.21	39.49
[R].LCVLHEK.[T]	898.481	1xCarbamidomethyl [C2]	48.28	0	0.0214012	0	39	0	2.33	High	0.0006956	0.02056	131.5	122.8	127	77.8	106.4	34.6	5.04	35.91	18.18	37.53	44.76	42.59
[R].LCVLHEKTPVSEK.[V]	1539.82	1xCarbamidomethyl [C2]	52.14	1	0.00421351	0	2	0	3.5	High	0	3.84e-05	314.8	139.6	85.8	59.9			26.17	28.1
[R].MPCTEDYLSLILNR.[L]	1740.83	1xCarbamidomethyl [C3]; 1xOxidation [M1]	106.38	0	1.62576e-05	0	124	0	5.22	High	0	8.081e-08	166.9	132	134.7	56.3	87.7	22.4	33.87	34.42	7.96	3.14	49.19	11.25
[R].MPCTEDYLSLILNR.[L]	1724.83	1xCarbamidomethyl [C3]	110.02	0	1.99203e-05	0	216	0	5.38	High	0	2.46e-08	262.1	144.2	74.1	56.7	40.2	22.8	19.65	90.36	27.85	20.37	73.82	31.41
[R].MPCTEDYLSLILNRLCVLHEK.[T]	2620.29	2xCarbamidomethyl [C3; C16]; 1xOxidation [M1]	116.33	1	0.0547297	0	1	0	1.94	High	0	0.002791	600						72.6
[R].NECFLSHK.[D]	1034.47	1xCarbamidomethyl [C3]	48.51	0	0.0330306	0	13	0	2.55	High	2.423e-05	0.003116	54	32.2	168	171.3	107.6	66.8	72.61	59.49	19.47	84.06	120.33	2.62
[R].NECFLSHKDDSPDLPK.[L]	1901.87	1xCarbamidomethyl [C3]	59.68	1	5.07848e-05	0	74	0	5.2	High	0	1.403e-06	203.4	141	114.5	77	37.8	26.3	2.07	7.45	5.93	12.9	11.21	16.47
[R].RHPEYAVSVLLR.[L]	1439.81		70.63	1	6.33784e-06	0	196	0	4.64	High	0	1.174e-07	207.8	167.1	88.4	72.4	41.2	23.1	24.69	16.18	6.24	11.37	37.12	6.69
[R].RHPYFYAPELLYYANK.[Y]	2045.03		88.02	1	1.82751e-05	0	107	0	5.57	High	0	2.025e-08	202.4	131.7	137	72.8	38.3	17.9	26.85	8.68	5.67	37.35	28.37	5.21
[R].RPCFSALTPDETYVPK.[A]	1880.92	1xCarbamidomethyl [C3]	73.93	0	0.000115176	0	183	0	4.38	High	0	4.965e-05	196.4	134.9	99.8	93.1	48.1	27.7	16.26	1.5	2.11	9.85	2.08	0.38
[R].RPCFSALTPDETYVPKAFDEK.[L]	2471.19	1xCarbamidomethyl [C3]	81.09	1	0.000550141	0	1	0	3.56	High	0	1.333e-06	600						109.9

## Sheet: Table S2-2
Table S2-2. List of Arabidopsis thaliana proteins identified in the experiment after protein isolation with detergent treatment
Protein FDR Confidence: Combined	Master	Accession	Description	Exp. q-value: Combined	Sum PEP Score	Coverage [%]	# Peptides	# PSMs	# Unique Peptides	# Protein Groups	# AAs	MW [kDa]	calc. pI	Score Sequest HT: Sequest HT	# Peptides (by Search Engine): Sequest HT	# Razor Peptides
High	Master Protein	O03042	Ribulose bisphosphate carboxylase large chain OS=Arabidopsis thaliana OX=3702 GN=rbcL PE=1 SV=1	0	173.168	56	28	86	28	1	479	52.9	6.29	239.65	28	0
High	Master Protein	P19366	ATP synthase subunit beta, chloroplastic OS=Arabidopsis thaliana OX=3702 GN=atpB PE=1 SV=2	0	159.272	59	23	74	22	1	498	53.9	5.5	244.81	23	1
High	Master Protein	Q9LD57	Phosphoglycerate kinase 1, chloroplastic OS=Arabidopsis thaliana OX=3702 GN=PGK1 PE=1 SV=1	0	95.578	46	18	52	10	1	481	50.1	6.24	137.26	18	8
High	Master Protein	Q9C5A9	ATP synthase subunit beta-3, mitochondrial OS=Arabidopsis thaliana OX=3702 GN=At5g08680 PE=1 SV=1	0	89.891	36	15	36	14	1	559	59.8	6.49	126.68	15	0
High	Master Protein Candidate	P83483	ATP synthase subunit beta-1, mitochondrial OS=Arabidopsis thaliana OX=3702 GN=At5g08670 PE=1 SV=1	0	89.891	37	15	36	14	1	556	59.6	6.62	126.68	15	0
High	Master Protein Candidate	P83484	ATP synthase subunit beta-2, mitochondrial OS=Arabidopsis thaliana OX=3702 GN=At5g08690 PE=1 SV=1	0	89.891	37	15	36	14	1	556	59.7	6.62	126.68	15	0
High	Master Protein	P10896	Ribulose bisphosphate carboxylase/oxygenase activase, chloroplastic OS=Arabidopsis thaliana OX=3702 GN=RCA PE=1 SV=2	0	84.692	45	14	33	14	1	474	51.9	6.15	133.86	14	0
High	Master Protein	P56757	ATP synthase subunit alpha, chloroplastic OS=Arabidopsis thaliana OX=3702 GN=atpA PE=1 SV=1	0	80.111	30	14	36	14	1	507	55.3	5.25	120.96	14	0
High	None	F4IVZ7	Rubisco activase OS=Arabidopsis thaliana OX=3702 GN=RCA PE=1 SV=1	0	78.734	42	13	31	13	1	441	48.5	7.69	125.14	13	0
High	Master Protein	P27140	Beta carbonic anhydrase 1, chloroplastic OS=Arabidopsis thaliana OX=3702 GN=BCA1 PE=1 SV=2	0	74.826	47	12	29	6	1	347	37.4	5.99	89.26	12	7
High	Master Protein Candidate	A0A1I9LQB3	Carbonic anhydrase OS=Arabidopsis thaliana OX=3702 GN=CA1 PE=1 SV=1	0	74.826	63	12	29	6	1	259	28.2	5.4	89.26	12	0
High	Master Protein	P46422	Glutathione S-transferase F2 OS=Arabidopsis thaliana OX=3702 GN=GSTF2 PE=1 SV=3	0	70.403	64	12	38	10	1	212	24.1	6.35	113.05	12	2
High	Master Protein	Q9XF89	Chlorophyll a-b binding protein CP26, chloroplastic OS=Arabidopsis thaliana OX=3702 GN=LHCB5 PE=1 SV=1	0	67.617	46	10	31	10	1	280	30.1	6.37	87.74	10	0
High	Master Protein	Q9LJG3	GDSL esterase/lipase ESM1 OS=Arabidopsis thaliana OX=3702 GN=ESM1 PE=1 SV=1	0	63.018	38	10	29	10	1	392	44	7.72	104.79	10	0
High	Master Protein	P42737	Beta carbonic anhydrase 2, chloroplastic OS=Arabidopsis thaliana OX=3702 GN=BCA2 PE=1 SV=3	0	60.508	36	9	24	3	1	331	36.6	7.4	78.83	9	0
High	Master Protein	P38418	Lipoxygenase 2, chloroplastic OS=Arabidopsis thaliana OX=3702 GN=LOX2 PE=1 SV=1	0	59.886	20	14	28	14	1	896	102	5.62	92.48	14	0
High	Master Protein	P25858	Glyceraldehyde-3-phosphate dehydrogenase GAPC1, cytosolic OS=Arabidopsis thaliana OX=3702 GN=GAPC1 PE=1 SV=2	0	59.607	45	11	26	11	1	338	36.9	7.12	74.21	11	0
High	Master Protein Candidate	Q9FX54	Glyceraldehyde-3-phosphate dehydrogenase GAPC2, cytosolic OS=Arabidopsis thaliana OX=3702 GN=GAPC2 PE=1 SV=1	0	59.607	45	11	26	11	1	338	36.9	7.18	74.21	11	0
High	Master Protein	P17745	Elongation factor Tu, chloroplastic OS=Arabidopsis thaliana OX=3702 GN=TUFA PE=1 SV=1	0	56.413	32	10	20	9	1	476	51.6	6.19	65.63	10	1
High	Master Protein	B3H5S2	Ribulose bisphosphate carboxylase small chain OS=Arabidopsis thaliana OX=3702 GN=RBCS3B PE=3 SV=1	0	55.973	43	9	26	4	1	186	20.8	8.29	67.3	9	5
High	Master Protein Candidate	P10797	Ribulose bisphosphate carboxylase small chain 2B, chloroplastic OS=Arabidopsis thaliana OX=3702 GN=RBCS-2B PE=2 SV=2	0	55.973	44	9	26	4	1	181	20.3	7.71	67.3	9	0
High	Master Protein Candidate	P10798	Ribulose bisphosphate carboxylase small chain 3B, chloroplastic OS=Arabidopsis thaliana OX=3702 GN=RBCS-3B PE=2 SV=2	0	55.973	44	9	26	4	1	181	20.3	8.05	67.3	9	0
High	Master Protein Candidate	F4KA76	Ribulose bisphosphate carboxylase small chain OS=Arabidopsis thaliana OX=3702 GN=RBCS3B PE=3 SV=1	0	55.973	46	9	26	4	1	174	19.4	8.03	67.3	9	0
High	Master Protein	P25856	Glyceraldehyde-3-phosphate dehydrogenase GAPA1, chloroplastic OS=Arabidopsis thaliana OX=3702 GN=GAPA1 PE=1 SV=3	0	55.776	34	12	24	4	1	396	42.5	7.75	86.22	12	8
High	Master Protein	P10795	Ribulose bisphosphate carboxylase small chain 1A, chloroplastic OS=Arabidopsis thaliana OX=3702 GN=RBCS-1A PE=1 SV=2	0	53.713	44	9	27	5	1	180	20.2	7.71	75.19	9	0
High	None	F4HQT1	Glyceraldehyde-3-phosphate dehydrogenase C2 OS=Arabidopsis thaliana OX=3702 GN=GAPC2 PE=1 SV=1	0	52.736	38	9	23	9	1	310	33.9	7.21	71.19	9	0
High	None	F4K873	Carbonic anhydrase OS=Arabidopsis thaliana OX=3702 GN=CA2 PE=1 SV=1	0	50.966	31	8	22	3	1	330	36.5	7.64	71.91	8	0
High	None	A8MQY4	Carbonic anhydrase OS=Arabidopsis thaliana OX=3702 GN=CA2 PE=1 SV=1	0	50.966	33	8	22	3	1	310	34.4	7.9	71.91	8	0
High	None	F4K875	Carbonic anhydrase OS=Arabidopsis thaliana OX=3702 GN=CA2 PE=1 SV=1	0	50.966	31	8	22	3	1	330	36.5	7.64	71.91	8	0
High	None	A0A1I9LPH1	Lipoxygenase OS=Arabidopsis thaliana OX=3702 GN=LOX2 PE=3 SV=1	0	50.259	19	11	22	11	1	754	85.9	5.5	74.07	11	0
High	Master Protein Candidate	Q9STX5	Endoplasmin homolog OS=Arabidopsis thaliana OX=3702 GN=HSP90-7 PE=1 SV=1	0	49.861	13	9	21	9	1	823	94.1	5.03	57.37	9	0
High	Master Protein	F4JQ55	Chaperone protein htpG family protein OS=Arabidopsis thaliana OX=3702 GN=SHD PE=1 SV=1	0	49.861	13	9	21	9	1	823	94.1	5.01	57.37	9	0
High	Master Protein	Q8RWV0	Transketolase-1, chloroplastic OS=Arabidopsis thaliana OX=3702 GN=TKL-1 PE=1 SV=1	0	49.853	19	10	19	10	1	741	79.9	6.37	63.05	10	0
High	Master Protein Candidate	F4JBY2	Transketolase OS=Arabidopsis thaliana OX=3702 GN=AtTKL1 PE=1 SV=1	0	49.853	19	10	19	10	1	740	79.8	6.43	63.05	10	0
High	None	A0A1I9LQL1	GDSL-like lipase/acylhydrolase superfamily protein OS=Arabidopsis thaliana OX=3702 GN=ESM1 PE=4 SV=1	0	49.266	42	8	23	8	1	264	30.3	8.54	79.8	8	0
High	Master Protein	P25857	Glyceraldehyde-3-phosphate dehydrogenase GAPB, chloroplastic OS=Arabidopsis thaliana OX=3702 GN=GAPB PE=1 SV=2	0	48.968	27	11	21	10	1	447	47.6	6.8	66.75	11	0
High	Master Protein Candidate	F4I3L1	Phosphoglycerate kinase OS=Arabidopsis thaliana OX=3702 GN=At1g56190 PE=1 SV=1	0	48.629	38	12	24	2	1	405	42.6	5.54	66.64	12	0
High	Master Protein	P50318	Phosphoglycerate kinase 2, chloroplastic OS=Arabidopsis thaliana OX=3702 GN=At1g56190 PE=1 SV=3	0	48.629	32	12	24	2	1	478	49.9	8.27	66.64	12	2
High	Master Protein	A0A1P8AWT7	Catalase 3 OS=Arabidopsis thaliana OX=3702 GN=CAT3 PE=1 SV=1	0	48.337	26	11	29	8	1	551	63.5	8.9	79.15	11	3
High	Master Protein Candidate	Q42547	Catalase-3 OS=Arabidopsis thaliana OX=3702 GN=CAT3 PE=1 SV=3	0	48.337	29	11	29	8	1	492	56.7	7.64	79.15	11	0
High	Master Protein Candidate	B9DG18	AT1G20620 protein OS=Arabidopsis thaliana OX=3702 GN=CAT3 PE=1 SV=1	0	48.337	30	11	29	8	1	485	55.9	7.64	79.15	11	0
High	Master Protein	Q9XFT3	Oxygen-evolving enhancer protein 3-1, chloroplastic OS=Arabidopsis thaliana OX=3702 GN=PSBQ1 PE=1 SV=3	0	47.956	41	12	28	10	1	224	23.9	9.64	72.99	12	2
High	Master Protein	O50008	5-methyltetrahydropteroyltriglutamate--homocysteine methyltransferase 1 OS=Arabidopsis thaliana OX=3702 GN=MS1 PE=1 SV=1	0	47.767	15	9	21	2	1	765	84.3	6.51	73.89	9	7
High	Master Protein	Q944G9	Fructose-bisphosphate aldolase 2, chloroplastic OS=Arabidopsis thaliana OX=3702 GN=FBA2 PE=1 SV=2	0	44.386	26	8	16	5	1	398	43	7.24	63.68	8	0
High	Master Protein	O23654	V-type proton ATPase catalytic subunit A OS=Arabidopsis thaliana OX=3702 GN=VHA-A PE=1 SV=1	0	44.164	22	12	23	12	1	623	68.8	5.24	71.51	12	0
High	Master Protein	Q9ZP06	Malate dehydrogenase 1, mitochondrial OS=Arabidopsis thaliana OX=3702 GN=At1g53240 PE=1 SV=1	0	44	35	7	12	6	1	341	35.8	8.35	49	7	1
High	Master Protein	A0A1P8APR6	Glyceraldehyde-3-phosphate dehydrogenase OS=Arabidopsis thaliana OX=3702 GN=GAPA-2 PE=3 SV=1	0	43.837	22	9	19	1	1	441	47.6	8.25	66.59	9	0
High	Master Protein Candidate	Q9LPW0	Glyceraldehyde-3-phosphate dehydrogenase GAPA2, chloroplastic OS=Arabidopsis thaliana OX=3702 GN=GAPA2 PE=2 SV=1	0	43.837	25	9	19	1	1	399	42.8	8.05	66.59	9	0
High	Master Protein Candidate	F4KCE5	Heat shock cognate protein 70-1 OS=Arabidopsis thaliana OX=3702 GN=HSC70-1 PE=1 SV=1	0	43.708	25	10	19	2	1	521	57.2	5.1	61.86	10	0
High	Master Protein	P22953	Probable mediator of RNA polymerase II transcription subunit 37e OS=Arabidopsis thaliana OX=3702 GN=MED37E PE=1 SV=3	0	43.708	20	10	19	2	1	651	71.3	5.12	61.86	10	8
High	Master Protein Candidate	B3H4B8	Aldolase-type TIM barrel family protein OS=Arabidopsis thaliana OX=3702 GN=GOX1 PE=3 SV=1	0	43.681	35	11	23	6	1	366	40.3	9.35	58.01	11	0
High	Master Protein	Q2V3V9	Aldolase-type TIM barrel family protein OS=Arabidopsis thaliana OX=3702 GN=GOX1 PE=3 SV=2	0	43.681	35	11	23	6	1	367	40.3	8.76	58.01	11	4
High	Master Protein Candidate	A8MS37	Aldolase-type TIM barrel family protein OS=Arabidopsis thaliana OX=3702 GN=GOX1 PE=3 SV=1	0	43.681	36	11	23	6	1	360	39.4	9.5	58.01	11	0
High	Master Protein Candidate	Q9LRR9	(S)-2-hydroxy-acid oxidase GLO1 OS=Arabidopsis thaliana OX=3702 GN=GLO1 PE=1 SV=1	0	43.681	35	11	23	6	1	367	40.3	9.13	58.01	11	0
High	None	F4HUL6	Catalase 3 OS=Arabidopsis thaliana OX=3702 GN=CAT3 PE=1 SV=1	0	43.271	30	9	25	7	1	427	48.9	6.8	67.77	9	0
High	Master Protein	Q9SY97	Photosystem I chlorophyll a/b-binding protein 3-1, chloroplastic OS=Arabidopsis thaliana OX=3702 GN=LHCA3 PE=1 SV=1	0	41.656	23	5	14	5	1	273	29.2	8.68	48.91	5	0
High	Master Protein	O65719	Heat shock 70 kDa protein 3 OS=Arabidopsis thaliana OX=3702 GN=HSP70-3 PE=1 SV=1	0	41.655	20	10	18	2	1	649	71.1	5.07	56.82	10	0
High	Master Protein	P25697	Phosphoribulokinase, chloroplastic OS=Arabidopsis thaliana OX=3702 GN=At1g32060 PE=1 SV=1	0	41.487	32	9	22	9	1	395	44.4	6.05	64.93	9	0
High	Master Protein	P10796	Ribulose bisphosphate carboxylase small chain 1B, chloroplastic OS=Arabidopsis thaliana OX=3702 GN=RBCS-1B PE=1 SV=1	0	41.308	44	9	21	4	1	181	20.3	7.71	53.61	9	0
High	Master Protein	P37702	Myrosinase 1 OS=Arabidopsis thaliana OX=3702 GN=TGG1 PE=1 SV=1	0	40.902	27	12	23	12	1	541	61.1	5.92	67.09	12	0
High	Master Protein	Q9SJU4	Fructose-bisphosphate aldolase 1, chloroplastic OS=Arabidopsis thaliana OX=3702 GN=FBA1 PE=1 SV=2	0	40.567	29	9	17	6	1	399	42.9	6.58	47.5	9	3
High	Master Protein Candidate	F4IGL5	Fructose-bisphosphate aldolase OS=Arabidopsis thaliana OX=3702 GN=FBA1 PE=3 SV=1	0	40.567	30	9	17	6	1	389	41.8	6.28	47.5	9	0
High	Master Protein	Q9SUR6	Cystine lyase CORI3 OS=Arabidopsis thaliana OX=3702 GN=CORI3 PE=1 SV=1	0	40.485	28	10	17	10	1	422	47	6.28	54.57	10	0
High	Master Protein	Q9XF88	Chlorophyll a-b binding protein CP29.2, chloroplastic OS=Arabidopsis thaliana OX=3702 GN=LHCB4.2 PE=1 SV=1	0	40.166	25	7	18	5	1	287	31.2	6.24	53.46	7	2
High	Master Protein	Q9SRV5	5-methyltetrahydropteroyltriglutamate--homocysteine methyltransferase 2 OS=Arabidopsis thaliana OX=3702 GN=MS2 PE=1 SV=1	0	39.942	15	9	19	2	1	765	84.5	6.51	64.55	9	0
High	Master Protein	Q9SAJ4	Phosphoglycerate kinase 3, cytosolic OS=Arabidopsis thaliana OX=3702 GN=PGK3 PE=1 SV=1	0	39.656	21	7	16	4	1	401	42.1	5.68	47.55	7	0
High	Master Protein Candidate	P82281	Thylakoid lumenal 29 kDa protein, chloroplastic OS=Arabidopsis thaliana OX=3702 GN=TL29 PE=1 SV=2	0	39.612	30	8	19	8	1	349	37.9	8.46	54.89	8	0
High	Master Protein Candidate	A0A1P8B8W6	Ascorbate peroxidase 4 OS=Arabidopsis thaliana OX=3702 GN=TL29 PE=1 SV=1	0	39.612	36	8	19	8	1	284	31	6.83	54.89	8	0
High	Master Protein	A0A1P8B8Y3	Ascorbate peroxidase 4 OS=Arabidopsis thaliana OX=3702 GN=TL29 PE=1 SV=1	0	39.612	26	8	19	8	1	396	43.4	7.84	54.89	8	0
High	None	F4JUJ5	Fructose-bisphosphate aldolase OS=Arabidopsis thaliana OX=3702 GN=FBA2 PE=1 SV=1	0	39.252	22	7	14	4	1	381	41.3	8.94	55.19	7	0
High	Master Protein	Q9C5C2	Myrosinase 2 OS=Arabidopsis thaliana OX=3702 GN=TGG2 PE=1 SV=1	0	38.525	14	7	15	7	1	547	62.7	7.44	40.16	7	0
High	None	F4HRR5	Ribulose bisphosphate carboxylase small chain OS=Arabidopsis thaliana OX=3702 GN=RBCS1A PE=1 SV=1	0	38.33	19	4	15	3	1	136	14.5	6.02	48.04	4	0
High	Master Protein	Q42029	Oxygen-evolving enhancer protein 2-1, chloroplastic OS=Arabidopsis thaliana OX=3702 GN=PSBP1 PE=1 SV=2	0	38.207	38	6	14	6	1	263	28.1	7.39	51.94	6	0
High	Master Protein	B3H560	Malate dehydrogenase OS=Arabidopsis thaliana OX=3702 GN=PMDH2 PE=3 SV=1	0	38.096	22	5	13	5	1	363	38.7	8.95	48.3	5	0
High	Master Protein Candidate	A8MRP1	Malate dehydrogenase OS=Arabidopsis thaliana OX=3702 GN=PMDH2 PE=3 SV=1	0	38.096	23	5	13	5	1	342	36.3	8.84	48.3	5	0
High	Master Protein Candidate	F4KDZ4	Malate dehydrogenase OS=Arabidopsis thaliana OX=3702 GN=PMDH2 PE=3 SV=1	0	38.096	24	5	13	5	1	333	35	7.66	48.3	5	0
High	Master Protein Candidate	Q9ZP05	Malate dehydrogenase 2, peroxisomal OS=Arabidopsis thaliana OX=3702 GN=PMDH2 PE=1 SV=1	0	38.096	23	5	13	5	1	354	37.3	7.99	48.3	5	0
High	None	F4IGL7	Fructose-bisphosphate aldolase OS=Arabidopsis thaliana OX=3702 GN=FBA1 PE=3 SV=1	0	37.815	34	8	15	5	1	311	33.3	6.8	41.8	8	0
High	None	Q2V4M4	Catalase 3 OS=Arabidopsis thaliana OX=3702 GN=CAT3 PE=1 SV=3	0	37.597	32	9	24	7	1	377	43.9	7.61	63.17	9	0
High	None	F4HNZ6	Glyceraldehyde 3-phosphate dehydrogenase A subunit 2 OS=Arabidopsis thaliana OX=3702 GN=GAPA-2 PE=4 SV=1	0	37.372	26	8	17	0	2	317	34.3	6.64	57.18	8	0
High	Master Protein Candidate	F4HR88	Leucine-rich repeat (LRR) family protein OS=Arabidopsis thaliana OX=3702 GN=At1g33590 PE=4 SV=1	0	36.225	21	7	13	7	1	477	51.7	8.91	43.31	7	0
High	Master Protein Candidate	Q9FW47	Leucine-rich repeat (LRR) family protein OS=Arabidopsis thaliana OX=3702 GN=At1g33590 PE=4 SV=1	0	36.225	20	7	13	7	1	512	55.5	8.91	43.31	7	0
High	Master Protein	A0A1P8AWX3	Leucine-rich repeat (LRR) family protein OS=Arabidopsis thaliana OX=3702 GN=At1g33590 PE=4 SV=1	0	36.225	20	7	13	7	1	514	55.8	8.91	43.31	7	0
High	Master Protein Candidate Rejected	Q9LHA8	Probable mediator of RNA polymerase II transcription subunit 37c OS=Arabidopsis thaliana OX=3702 GN=MED37C PE=1 SV=1	0	36.178	18	9	17	0	0	650	71.1	5.25	53.93	9	0
High	Master Protein Rejected	P22954	Probable mediator of RNA polymerase II transcription subunit 37c OS=Arabidopsis thaliana OX=3702 GN=MED37D PE=1 SV=2	0	36.178	18	9	17	0	0	653	71.3	5.12	53.93	9	0
High	Master Protein	Q41932	Oxygen-evolving enhancer protein 3-2, chloroplastic OS=Arabidopsis thaliana OX=3702 GN=PSBQ2 PE=1 SV=2	0	35.234	40	8	16	6	1	230	24.6	9.72	53.69	8	0
High	Master Protein	Q9LW57	Plastid-lipid-associated protein 6, chloroplastic OS=Arabidopsis thaliana OX=3702 GN=PAP6 PE=1 SV=1	0	35.148	44	9	19	9	1	284	30.4	6.13	47.61	9	0
High	Master Protein	Q9LRS0	(S)-2-hydroxy-acid oxidase GLO2 OS=Arabidopsis thaliana OX=3702 GN=GLO2 PE=1 SV=1	0	34.985	25	7	14	2	1	367	40.3	8.97	42.93	7	0
High	Master Protein	P28493	Pathogenesis-related protein 5 OS=Arabidopsis thaliana OX=3702 GN=At1g75040 PE=1 SV=1	0	34.46	42	7	14	7	1	239	25.2	4.98	43.81	7	0
High	Master Protein	Q9SMU8	Peroxidase 34 OS=Arabidopsis thaliana OX=3702 GN=PER34 PE=1 SV=1	0	34.406	25	7	15	4	1	353	38.8	7.64	52.14	7	3
High	Master Protein	Q9SJQ9	Fructose-bisphosphate aldolase 6, cytosolic OS=Arabidopsis thaliana OX=3702 GN=FBA6 PE=1 SV=1	0	34.336	32	8	14	4	1	358	38.4	7.39	42.88	8	4
High	Master Protein	O80852	Glutathione S-transferase F9 OS=Arabidopsis thaliana OX=3702 GN=GSTF9 PE=1 SV=1	0	34.215	33	7	20	7	1	215	24.1	6.65	49.65	7	0
High	Master Protein	Q9SSS9	ATP synthase subunit delta, chloroplastic OS=Arabidopsis thaliana OX=3702 GN=ATPD PE=1 SV=1	0	34.133	43	9	14	9	1	234	25.7	9.06	46.44	9	0
High	Master Protein	Q9LKR3	Mediator of RNA polymerase II transcription subunit 37a OS=Arabidopsis thaliana OX=3702 GN=MED37A PE=1 SV=1	0	33.585	16	8	13	1	1	669	73.6	5.17	42.77	8	0
High	Master Protein	P56777	Photosystem II CP47 reaction center protein OS=Arabidopsis thaliana OX=3702 GN=psbB PE=1 SV=1	0	33.563	17	8	12	8	1	508	56	6.89	44.53	8	0
High	Master Protein Candidate	Q39043	Mediator of RNA polymerase II transcription subunit 37f OS=Arabidopsis thaliana OX=3702 GN=MED37F PE=1 SV=2	0	33.536	16	8	13	1	1	668	73.5	5.21	42.59	8	0
High	Master Protein Candidate	F4K007	Heat shock protein 70 (Hsp 70) family protein OS=Arabidopsis thaliana OX=3702 GN=BIP2 PE=1 SV=1	0	33.536	18	8	13	1	1	613	67.4	5.29	42.59	8	0
High	Master Protein	A0A1P8BF32	Heat shock protein 70 (Hsp 70) family protein OS=Arabidopsis thaliana OX=3702 GN=BIP2 PE=1 SV=1	0	33.536	16	8	13	1	1	673	74.3	5.19	42.59	8	5
High	None	Q9C7X7	Heat shock 70 kDa protein 18 OS=Arabidopsis thaliana OX=3702 GN=HSP70-18 PE=2 SV=1	0	33.529	18	8	15	0	0	617	68.3	5.35	47.81	8	0
High	Master Protein	P23321	Oxygen-evolving enhancer protein 1-1, chloroplastic OS=Arabidopsis thaliana OX=3702 GN=PSBO1 PE=1 SV=2	0	32.993	34	10	20	4	1	332	35.1	5.66	55.15	10	6
High	Master Protein	Q9XF91	Photosystem II 22 kDa protein, chloroplastic OS=Arabidopsis thaliana OX=3702 GN=PSBS PE=2 SV=1	0	32.97	22	5	13	5	1	265	28	9.26	48.38	5	0
High	Master Protein	Q9LF98	Fructose-bisphosphate aldolase 8, cytosolic OS=Arabidopsis thaliana OX=3702 GN=FBA8 PE=1 SV=1	0	32.776	26	7	15	3	1	358	38.5	6.46	36.88	7	0
High	Master Protein	F4JBC9	Thioredoxin superfamily protein OS=Arabidopsis thaliana OX=3702 GN=PRXQ PE=4 SV=1	0	32.162	30	5	11	5	1	217	23.8	9.51	42.74	5	0
High	Master Protein Candidate	A0A1I9LR27	Thioredoxin superfamily protein OS=Arabidopsis thaliana OX=3702 GN=PRXQ PE=4 SV=1	0	32.162	43	5	11	5	1	154	17	9.14	42.74	5	0
High	Master Protein Candidate	Q9LU86	Peroxiredoxin Q, chloroplastic OS=Arabidopsis thaliana OX=3702 GN=PRXQ PE=1 SV=1	0	32.162	31	5	11	5	1	216	23.7	9.51	42.74	5	0
High	Master Protein	A0A1P8ATL2	Chloroplast RNA binding protein OS=Arabidopsis thaliana OX=3702 GN=CRB PE=4 SV=1	0	31.505	23	7	18	7	1	379	43.2	7.12	48.91	7	0
High	Master Protein Candidate	Q9SA52	Chloroplast stem-loop binding protein of 41 kDa b, chloroplastic OS=Arabidopsis thaliana OX=3702 GN=CSP41B PE=1 SV=1	0	31.505	23	7	18	7	1	378	42.6	8.16	48.91	7	0
High	None	F4IEG8	Chlorophyll A-B binding family protein OS=Arabidopsis thaliana OX=3702 GN=NPQ4 PE=4 SV=1	0	31.394	23	4	11	4	1	205	22	9.61	44.26	4	0
High	Master Protein Candidate	A0A1P8B9L1	Formate dehydrogenase, mitochondrial OS=Arabidopsis thaliana OX=3702 GN=FDH PE=3 SV=1	0	31.255	27	9	17	9	1	370	41	6.62	35.88	9	0
High	Master Protein	Q9S7E4	Formate dehydrogenase, chloroplastic/mitochondrial OS=Arabidopsis thaliana OX=3702 GN=FDH1 PE=1 SV=1	0	31.255	26	9	17	9	1	384	42.4	7.5	35.88	9	0
High	Master Protein Candidate	A0A1P8B9N1	Formate dehydrogenase, mitochondrial OS=Arabidopsis thaliana OX=3702 GN=FDH PE=3 SV=1	0	31.255	28	9	17	9	1	358	39.6	6.62	35.88	9	0
High	Master Protein	P09468	ATP synthase epsilon chain, chloroplastic OS=Arabidopsis thaliana OX=3702 GN=atpE PE=1 SV=2	0	31.21	42	5	14	5	1	132	14.5	6.1	53.25	5	0
High	Master Protein	Q9SHE8	Photosystem I reaction center subunit III, chloroplastic OS=Arabidopsis thaliana OX=3702 GN=PSAF PE=1 SV=1	0	31.059	36	6	13	6	1	221	24.2	9.54	40.99	6	0
High	Master Protein Candidate	P33157	Glucan endo-1,3-beta-glucosidase, acidic isoform OS=Arabidopsis thaliana OX=3702 GN=BG2 PE=1 SV=2	0	30.969	22	5	10	5	1	339	37.3	4.98	33.84	5	0
High	Master Protein	A0A1I9LMG6	Beta-1,3-glucanase 2 OS=Arabidopsis thaliana OX=3702 GN=BGL2 PE=3 SV=1	0	30.969	21	5	10	5	1	355	39.4	5.71	33.84	5	0
High	Master Protein	Q9S714	Photosystem I reaction center subunit IV B, chloroplastic OS=Arabidopsis thaliana OX=3702 GN=PSAE2 PE=2 SV=1	0	30.231	43	4	9	3	1	145	15.2	9.95	41.87	4	1
High	None	Q9SLM6	Glutathione S-transferase F3 OS=Arabidopsis thaliana OX=3702 GN=GSTF3 PE=2 SV=1	0	30.139	28	7	23	5	1	212	24.1	6.74	54.8	7	0
High	None	F4JP99	Tyrosine transaminase family protein OS=Arabidopsis thaliana OX=3702 GN=CORI3 PE=4 SV=1	0	29.856	27	8	13	8	1	380	42.2	5.74	39.66	8	0
High	None	F4JFV6	Aldolase-type TIM barrel family protein OS=Arabidopsis thaliana OX=3702 GN=GOX2 PE=3 SV=1	0	29.44	20	6	13	2	1	373	40.9	8.76	38.95	6	0
High	Master Protein	P47998	Cysteine synthase 1 OS=Arabidopsis thaliana OX=3702 GN=OASA1 PE=1 SV=2	0	29.215	33	6	9	6	1	322	33.8	6.14	29.14	6	0
High	None	Q9LKA3	Malate dehydrogenase 2, mitochondrial OS=Arabidopsis thaliana OX=3702 GN=At3g15020 PE=1 SV=1	0	29.095	25	5	7	4	1	341	35.9	8.19	28.87	5	0
High	Master Protein Candidate	P42643	14-3-3-like protein GF14 chi OS=Arabidopsis thaliana OX=3702 GN=GRF1 PE=1 SV=3	0	28.846	31	7	15	1	1	267	29.9	4.81	41.54	7	0
High	Master Protein	F4JJ94	General regulatory factor 1 OS=Arabidopsis thaliana OX=3702 GN=GRF1 PE=1 SV=1	0	28.846	26	7	15	1	1	318	35.8	4.77	41.54	7	6
High	Master Protein	Q07473	Chlorophyll a-b binding protein CP29.1, chloroplastic OS=Arabidopsis thaliana OX=3702 GN=LHCB4.1 PE=1 SV=1	0	28.46	20	5	13	3	1	290	31.1	6.14	43.76	5	0
High	None	A0A1P8BBQ0	Peroxisomal NAD-malate dehydrogenase 2 OS=Arabidopsis thaliana OX=3702 GN=PMDH2 PE=3 SV=1	0	28.323	19	4	9	4	1	353	37.2	7.99	35.69	4	0
High	Master Protein	Q9ASR1	Elongation factor 2 OS=Arabidopsis thaliana OX=3702 GN=LOS1 PE=1 SV=1	0	28.299	13	9	14	9	1	843	93.8	6.25	30.88	9	0
High	None	A0A1P8AWR0	Catalase 3 OS=Arabidopsis thaliana OX=3702 GN=CAT3 PE=1 SV=1	0	28.241	30	6	18	5	1	310	35.9	6.3	46.1	6	0
High	Master Protein	P27521	Chlorophyll a-b binding protein 4, chloroplastic OS=Arabidopsis thaliana OX=3702 GN=LHCA4 PE=1 SV=1	0	27.5	26	4	18	4	1	251	27.7	6.7	61.53	4	0
High	Master Protein	Q9SKP6	Triosephosphate isomerase, chloroplastic OS=Arabidopsis thaliana OX=3702 GN=TIM PE=1 SV=1	0	27.408	21	6	14	6	1	315	33.3	7.83	37.83	6	0
High	Master Protein Candidate	A8MRE8	Triosephosphate isomerase OS=Arabidopsis thaliana OX=3702 GN=TIM PE=1 SV=1	0	27.408	22	6	14	6	1	306	32.3	7.49	37.83	6	0
High	Master Protein	Q9S841	Oxygen-evolving enhancer protein 1-2, chloroplastic OS=Arabidopsis thaliana OX=3702 GN=PSBO2 PE=1 SV=1	0	27.244	32	8	14	2	1	331	35	6.16	48.68	8	0
High	Master Protein	Q05431	L-ascorbate peroxidase 1, cytosolic OS=Arabidopsis thaliana OX=3702 GN=APX1 PE=1 SV=2	0	27.116	27	5	10	5	1	250	27.5	6.13	19.15	5	0
High	Master Protein Candidate	F4HU93	Ascorbate peroxidase 1 OS=Arabidopsis thaliana OX=3702 GN=APX1 PE=1 SV=1	0	27.116	27	5	10	5	1	249	27.5	6.29	19.15	5	0
High	Master Protein	O49629	Probable plastid-lipid-associated protein 2, chloroplastic OS=Arabidopsis thaliana OX=3702 GN=PAP2 PE=1 SV=1	0	27.08	32	7	13	6	1	310	33.6	5.83	41.75	7	1
High	Master Protein	Q96262	Plasma membrane-associated cation-binding protein 1 OS=Arabidopsis thaliana OX=3702 GN=PCAP1 PE=1 SV=1	0	27.037	50	7	15	7	1	225	24.6	4.96	44.82	7	0
High	Master Protein	Q9FN48	Calcium sensing receptor, chloroplastic OS=Arabidopsis thaliana OX=3702 GN=CAS PE=1 SV=1	0	26.681	24	7	10	7	1	387	41.3	9.39	31.63	7	0
High	Master Protein	F4HWQ5	GF14 protein phi chain OS=Arabidopsis thaliana OX=3702 GN=GF14 PHI PE=1 SV=1	0	26.67	27	7	15	1	1	295	33.3	4.81	40.35	7	0
High	Master Protein Candidate	P46077	14-3-3-like protein GF14 phi OS=Arabidopsis thaliana OX=3702 GN=GRF4 PE=1 SV=2	0	26.67	30	7	15	1	1	267	30.2	4.87	40.35	7	0
High	Master Protein	Q9LMQ2	Chlorophyll a-b binding protein, chloroplastic OS=Arabidopsis thaliana OX=3702 GN=CHLOROPHYLL PROTEIN 24 PE=1 SV=1	0	26.651	20	6	17	6	1	258	27.5	7.4	39.17	6	0
High	Master Protein	P93819	Malate dehydrogenase 1, cytoplasmic OS=Arabidopsis thaliana OX=3702 GN=MDH1 PE=1 SV=2	0	26.291	24	7	16	7	1	332	35.5	6.55	35.86	7	0
High	Master Protein	P56771	Cytochrome f OS=Arabidopsis thaliana OX=3702 GN=petA PE=3 SV=1	0	26.237	32	8	12	8	1	320	35.3	8.29	34.8	8	0
High	Master Protein	Q96300	14-3-3-like protein GF14 nu OS=Arabidopsis thaliana OX=3702 GN=GRF7 PE=1 SV=1	0	25.957	28	7	14	1	1	265	29.8	4.82	34.79	7	1
High	Master Protein	P24101	Peroxidase 33 OS=Arabidopsis thaliana OX=3702 GN=PER33 PE=1 SV=1	0	25.811	18	4	9	1	1	354	38.9	6.87	33.88	4	0
High	Master Protein	Q43127	Glutamine synthetase, chloroplastic/mitochondrial OS=Arabidopsis thaliana OX=3702 GN=GLN2 PE=1 SV=1	0	25.378	13	4	13	4	1	430	47.4	6.87	41.02	4	0
High	Master Protein	P46283	Sedoheptulose-1,7-bisphosphatase, chloroplastic OS=Arabidopsis thaliana OX=3702 GN=At3g55800 PE=2 SV=1	0	25.3	18	6	10	6	1	393	42.4	6.57	33.32	6	0
High	None	A8MQK3	Malate dehydrogenase OS=Arabidopsis thaliana OX=3702 GN=mMDH2 PE=3 SV=1	0	25.241	22	4	6	3	1	316	33.1	9.45	23.82	4	0
High	Master Protein	Q01908	ATP synthase gamma chain 1, chloroplastic OS=Arabidopsis thaliana OX=3702 GN=ATPC1 PE=1 SV=1	0	25.165	20	6	14	6	1	373	40.9	8	41.41	6	0
High	Master Protein	Q9STW6	Heat shock 70 kDa protein 6, chloroplastic OS=Arabidopsis thaliana OX=3702 GN=HSP70-6 PE=1 SV=1	0	24.89	12	6	9	2	1	718	76.5	5.2	28.8	6	4
High	Master Protein	Q9FI56	Chaperone protein ClpC1, chloroplastic OS=Arabidopsis thaliana OX=3702 GN=CLPC1 PE=1 SV=1	0	24.673	8	7	14	7	1	929	103.4	6.77	38.26	7	0
High	Master Protein	Q9SIB9	Aconitate hydratase 3, mitochondrial OS=Arabidopsis thaliana OX=3702 GN=ACO3 PE=1 SV=2	0	24.412	8	6	10	5	1	990	108.1	7.17	25.72	6	1
High	Master Protein Candidate	Q94JQ4	Reactive Intermediate Deaminase A, chloroplastic OS=Arabidopsis thaliana OX=3702 GN=RIDA PE=1 SV=1	0	24.382	39	5	10	5	1	187	19.8	8.4	34.9	5	0
High	Master Protein	A0A1I9LS34	Endoribonuclease L-PSP family protein OS=Arabidopsis thaliana OX=3702 GN=RidA PE=4 SV=1	0	24.382	28	5	10	5	1	255	27.8	9.07	34.9	5	0
High	None	P93292	Putative uncharacterized mitochondrial protein AtMg00280 OS=Arabidopsis thaliana OX=3702 GN=AtMg00280 PE=5 SV=1	0	24.371	15	2	11	2	1	110	12.7	8.95	37.44	2	0
High	Master Protein	Q9FXA1	AT1G49750 protein OS=Arabidopsis thaliana OX=3702 GN=At1g49750 PE=2 SV=1	0	24.294	12	5	14	5	1	494	54.4	8.1	38.38	5	0
High	Master Protein	P56759	ATP synthase subunit b, chloroplastic OS=Arabidopsis thaliana OX=3702 GN=atpF PE=3 SV=1	0	24.149	35	7	13	7	1	184	21	8.13	39.59	7	0
High	None	A0A1I9LQU5	Plastid-lipid associated protein PAP / fibrillin family protein OS=Arabidopsis thaliana OX=3702 GN=FIB4 PE=1 SV=1	0	23.889	38	7	16	7	1	221	23.5	6.21	28.75	7	0
High	Master Protein	Q96291	2-Cys peroxiredoxin BAS1, chloroplastic OS=Arabidopsis thaliana OX=3702 GN=BAS1 PE=1 SV=2	0	23.438	31	7	12	3	1	266	29.1	7.44	33.33	7	4
High	Master Protein	Q9ZNZ7	Ferredoxin-dependent glutamate synthase 1, chloroplastic/mitochondrial OS=Arabidopsis thaliana OX=3702 GN=GLU1 PE=1 SV=3	0	23.359	5	5	8	5	1	1622	176.6	6.32	22.61	5	0
High	Master Protein	Q42139	AT4g32260/F10M6_100 OS=Arabidopsis thaliana OX=3702 GN=PDE334 PE=1 SV=2	0	23.253	22	4	9	4	1	219	23.9	5.86	24.96	4	0
High	None	Q01525	14-3-3-like protein GF14 omega OS=Arabidopsis thaliana OX=3702 GN=GRF2 PE=2 SV=2	0	22.365	25	6	13	0	2	259	29.1	4.79	34.26	6	0
High	Master Protein	Q9SRY5	Glutathione S-transferase F7 OS=Arabidopsis thaliana OX=3702 GN=GSTF7 PE=2 SV=3	0	22.294	30	6	15	1	1	209	23.6	6.62	33.99	6	0
High	Master Protein	P56761	Photosystem II D2 protein OS=Arabidopsis thaliana OX=3702 GN=psbD PE=1 SV=3	0	22.147	20	5	9	5	1	353	39.5	5.74	34.55	5	0
High	Master Protein	P0DH99	Elongation factor 1-alpha 1 OS=Arabidopsis thaliana OX=3702 GN=A1 PE=1 SV=1	0	22.089	17	5	10	5	1	449	49.5	9.11	34.34	5	0
High	Master Protein	P42760	Glutathione S-transferase F6 OS=Arabidopsis thaliana OX=3702 GN=GSTF6 PE=2 SV=2	0	22.023	26	6	14	1	1	208	23.5	6.23	31.76	6	3
High	Master Protein	P25696	Bifunctional enolase 2/transcriptional activator OS=Arabidopsis thaliana OX=3702 GN=ENO2 PE=1 SV=1	0	21.995	20	6	10	6	1	444	47.7	5.77	29.33	6	0
High	Master Protein Candidate	A0A1P8B1N1	Enolase OS=Arabidopsis thaliana OX=3702 GN=LOS2 PE=1 SV=1	0	21.995	21	6	10	6	1	433	46.5	5.53	29.33	6	0
High	Master Protein	Q9SYT0	Annexin D1 OS=Arabidopsis thaliana OX=3702 GN=ANN1 PE=1 SV=1	0	21.943	29	7	12	7	1	317	36.2	5.38	25.39	7	0
High	Master Protein	Q08682	40S ribosomal protein Sa-1 OS=Arabidopsis thaliana OX=3702 GN=RPSaA PE=1 SV=3	0	21.739	28	6	11	6	1	298	32.3	5.15	27.53	6	0
High	Master Protein Candidate	B9DG17	40S ribosomal protein SA OS=Arabidopsis thaliana OX=3702 GN=P40 PE=1 SV=1	0	21.739	28	6	11	6	1	294	32	5.15	27.53	6	0
High	Master Protein	Q9SZJ5	Serine hydroxymethyltransferase 1, mitochondrial OS=Arabidopsis thaliana OX=3702 GN=SHM1 PE=1 SV=1	0	21.715	16	6	11	6	1	517	57.4	8.13	31.8	6	0
High	None	A0A1P8BCX7	Calcium sensing receptor OS=Arabidopsis thaliana OX=3702 GN=CaS PE=1 SV=1	0	21.702	24	6	9	6	1	310	32.9	9.06	27.6	6	0
High	Master Protein Candidate	F4I576	Monodehydroascorbate reductase 6 OS=Arabidopsis thaliana OX=3702 GN=MDAR6 PE=4 SV=1	0	21.627	10	3	7	3	1	482	52.1	7.75	21.28	3	0
High	Master Protein	P92947	Monodehydroascorbate reductase, chloroplastic/mitochondrial OS=Arabidopsis thaliana OX=3702 GN=MDAR5 PE=1 SV=3	0	21.627	10	3	7	3	1	493	53.3	8.02	21.28	3	0
High	Master Protein	P31168	Dehydrin COR47 OS=Arabidopsis thaliana OX=3702 GN=COR47 PE=1 SV=2	0	21.604	25	6	14	5	1	265	29.9	4.77	17.96	6	1
High	None	A0A1I9LQU3	Plastid-lipid associated protein PAP / fibrillin family protein OS=Arabidopsis thaliana OX=3702 GN=FIB4 PE=1 SV=1	0	21.488	33	6	14	6	1	212	22.5	7.96	22.35	6	0
High	None	Q9SXJ7	Chaperone protein ClpC2, chloroplastic OS=Arabidopsis thaliana OX=3702 GN=CLPC2 PE=1 SV=1	0	21.199	8	6	12	6	1	952	105.7	6.42	38.26	6	0
High	None	F4JF64	Clp ATPase OS=Arabidopsis thaliana OX=3702 GN=HSP93-III PE=3 SV=1	0	21.199	8	6	12	6	1	921	102.2	6.21	38.26	6	0
High	Master Protein	Q9SN86	Malate dehydrogenase, chloroplastic OS=Arabidopsis thaliana OX=3702 GN=At3g47520 PE=1 SV=1	0	21.199	15	4	6	3	1	403	42.4	8.51	25.23	4	0
High	Master Protein	Q9S757	Bifunctional L-3-cyanoalanine synthase/cysteine synthase C1, mitochondrial OS=Arabidopsis thaliana OX=3702 GN=CYSC1 PE=1 SV=1	0	21.044	20	5	6	5	1	368	39.9	8.54	16.99	5	0
High	None	P57106	Malate dehydrogenase 2, cytoplasmic OS=Arabidopsis thaliana OX=3702 GN=MDH2 PE=1 SV=1	0	20.977	20	6	12	6	1	332	35.7	6.79	23.64	6	0
High	Master Protein	Q9LR30	Glutamate--glyoxylate aminotransferase 1 OS=Arabidopsis thaliana OX=3702 GN=GGAT1 PE=1 SV=1	0	20.799	17	5	8	5	1	481	53.3	6.89	25.22	5	0
High	Master Protein	P34788	40S ribosomal protein S18 OS=Arabidopsis thaliana OX=3702 GN=RPS18A PE=1 SV=1	0	20.789	32	4	9	4	1	152	17.5	10.54	30.97	4	0
High	Master Protein	P49107	Photosystem I reaction center subunit N, chloroplastic OS=Arabidopsis thaliana OX=3702 GN=PSAN PE=1 SV=2	0	20.591	24	5	9	5	1	171	18.4	8.92	27.6	5	0
High	Master Protein	F4IX26	Rotamase CYP 4 OS=Arabidopsis thaliana OX=3702 GN=ROC4 PE=4 SV=1	0	20.59	19	4	10	4	1	313	34.3	9.1	31.7	4	0
High	Master Protein Candidate	F4IX28	Peptidyl-prolyl cis-trans isomerase OS=Arabidopsis thaliana OX=3702 GN=ROC4 PE=3 SV=1	0	20.59	23	4	10	4	1	259	28.1	8.75	31.7	4	0
High	Master Protein Candidate	P34791	Peptidyl-prolyl cis-trans isomerase CYP20-3, chloroplastic OS=Arabidopsis thaliana OX=3702 GN=CYP20-3 PE=1 SV=1	0	20.59	23	4	10	4	1	260	28.2	8.59	31.7	4	0
High	Master Protein	P48347	14-3-3-like protein GF14 epsilon OS=Arabidopsis thaliana OX=3702 GN=GRF10 PE=1 SV=1	0	20.353	25	4	11	3	1	254	28.9	4.81	30.48	4	0
High	Master Protein Candidate	F4I1C1	General regulatory factor 10 OS=Arabidopsis thaliana OX=3702 GN=GRF10 PE=3 SV=1	0	20.353	25	4	11	3	1	251	28.6	4.92	30.48	4	0
High	Master Protein	Q9STF2	Protein PLASTID TRANSCRIPTIONALLY ACTIVE 16, chloroplastic OS=Arabidopsis thaliana OX=3702 GN=PTAC16 PE=1 SV=1	0	20.351	17	6	10	6	1	510	54.3	8.91	32.89	6	0
High	Master Protein Candidate	F4IVN6	Calmodulin 5 OS=Arabidopsis thaliana OX=3702 GN=CAM5 PE=3 SV=1	0	20.309	27	5	9	5	1	181	20.6	4.82	28.45	5	0
High	Master Protein Candidate	A0A1I9LPJ1	Calmodulin 7 OS=Arabidopsis thaliana OX=3702 GN=CAM7 PE=3 SV=1	0	20.309	43	5	9	5	1	113	12.9	4.32	28.45	5	0
High	Master Protein Candidate	P0DH97	Calmodulin-2 OS=Arabidopsis thaliana OX=3702 GN=CAM2 PE=1 SV=1	0	20.309	33	5	9	5	1	149	16.8	4.27	28.45	5	0
High	Master Protein Candidate	Q03509	Calmodulin-6 OS=Arabidopsis thaliana OX=3702 GN=CAM6 PE=1 SV=2	0	20.309	33	5	9	5	1	149	16.8	4.27	28.45	5	0
High	Master Protein Candidate	F4K8M3	Calmodulin 1 OS=Arabidopsis thaliana OX=3702 GN=CAM1 PE=3 SV=1	0	20.309	30	5	9	5	1	164	18.5	4.31	28.45	5	0
High	Master Protein Candidate	A0A1P8BAP4	Calmodulin 1 OS=Arabidopsis thaliana OX=3702 GN=CAM1 PE=3 SV=1	0	20.309	36	5	9	5	1	136	15.4	4.41	28.45	5	0
High	Master Protein Candidate	F4K8M2	Calmodulin 1 OS=Arabidopsis thaliana OX=3702 GN=CAM1 PE=3 SV=1	0	20.309	28	5	9	5	1	175	19.8	4.32	28.45	5	0
High	Master Protein	A0A1I9LPJ2	Calmodulin 7 OS=Arabidopsis thaliana OX=3702 GN=CAM7 PE=3 SV=1	0	20.309	23	5	9	5	1	214	24.5	5.91	28.45	5	0
High	Master Protein Candidate	F4IJ46	Calmodulin 2 OS=Arabidopsis thaliana OX=3702 GN=CAM2 PE=3 SV=1	0	20.309	30	5	9	5	1	161	18.1	4.31	28.45	5	0
High	Master Protein Candidate	P59220	Calmodulin-7 OS=Arabidopsis thaliana OX=3702 GN=CAM7 PE=1 SV=2	0	20.309	33	5	9	5	1	149	16.8	4.27	28.45	5	0
High	Master Protein Candidate	P0DH95	Calmodulin-1 OS=Arabidopsis thaliana OX=3702 GN=CAM1 PE=1 SV=1	0	20.309	33	5	9	5	1	149	16.9	4.27	28.45	5	0
High	Master Protein Candidate	A0A1P8ANC4	Calmodulin 4 OS=Arabidopsis thaliana OX=3702 GN=CAM4 PE=3 SV=1	0	20.309	43	5	9	5	1	113	12.9	4.32	28.45	5	0
High	Master Protein Candidate	F4IEU4	Calmodulin 4 OS=Arabidopsis thaliana OX=3702 GN=CAM4 PE=3 SV=1	0	20.309	31	5	9	5	1	159	17.8	4.22	28.45	5	0
High	Master Protein	O81439	Probable plastid-lipid-associated protein 1, chloroplastic OS=Arabidopsis thaliana OX=3702 GN=PAP1 PE=1 SV=1	0	20.194	24	5	9	4	1	318	34.9	5.6	27.87	5	0
High	None	F4JUT9	Plasma-membrane associated cation-binding protein 1 OS=Arabidopsis thaliana OX=3702 GN=PCAP1 PE=1 SV=1	0	20.189	42	5	12	5	1	167	19	9.88	33.76	5	0
High	Master Protein	O65581	Fructose-bisphosphate aldolase 5, cytosolic OS=Arabidopsis thaliana OX=3702 GN=FBA5 PE=1 SV=1	0	20.007	12	4	10	2	1	358	38.3	5.81	28.55	4	0
High	Master Protein	Q9ZR03	Cytochrome b6-f complex iron-sulfur subunit, chloroplastic OS=Arabidopsis thaliana OX=3702 GN=petC PE=1 SV=1	0	19.955	25	4	11	4	1	229	24.4	8.54	30.38	4	0
High	None	P42645	14-3-3-like protein GF14 upsilon OS=Arabidopsis thaliana OX=3702 GN=GRF5 PE=1 SV=2	0	19.857	24	6	11	1	1	268	30.2	4.81	31.5	6	0
High	Master Protein Candidate	Q9S7J7	Chlorophyll a-b binding protein 2.2, chloroplastic OS=Arabidopsis thaliana OX=3702 GN=LHCB2.2 PE=1 SV=1	0	19.659	18	4	20	2	1	265	28.6	5.43	39.99	4	0
High	Master Protein Candidate	Q9XF87	Chlorophyll a-b binding protein 2.4, chloroplastic OS=Arabidopsis thaliana OX=3702 GN=LHCB2.4 PE=1 SV=1	0	19.659	18	4	20	2	1	266	28.8	5.9	39.99	4	0
High	Master Protein Candidate	Q9SHR7	Chlorophyll a-b binding protein 2.1, chloroplastic OS=Arabidopsis thaliana OX=3702 GN=LHCB2.1 PE=1 SV=1	0	19.659	18	4	20	2	1	265	28.6	5.43	39.99	4	0
High	Master Protein	A0A1P8AZ91	Chlorophyll a-b binding protein, chloroplastic OS=Arabidopsis thaliana OX=3702 GN=LHCB2.1 PE=3 SV=1	0	19.659	15	4	20	2	1	317	35.1	7.02	39.99	4	3
High	Master Protein Candidate	A0A1I9LMB4	Chlorophyll a-b binding protein, chloroplastic OS=Arabidopsis thaliana OX=3702 GN=LHCB2.3 PE=3 SV=1	0	19.659	16	4	20	2	1	298	32.6	6.23	39.99	4	0
High	Master Protein Candidate	P51818	Heat shock protein 90-3 OS=Arabidopsis thaliana OX=3702 GN=HSP90-3 PE=1 SV=2	0	19.609	11	6	9	6	1	699	80	5.05	23.33	6	0
High	Master Protein Candidate	P55737	Heat shock protein 90-2 OS=Arabidopsis thaliana OX=3702 GN=HSP90-2 PE=1 SV=1	0	19.609	11	6	9	6	1	699	80	5.05	23.33	6	0
High	Master Protein Candidate	O03986	Heat shock protein 90-4 OS=Arabidopsis thaliana OX=3702 GN=HSP90-4 PE=1 SV=1	0	19.609	11	6	9	6	1	699	80.1	5.05	23.33	6	0
High	Master Protein	F4K6B6	Heat shock protein 81-2 OS=Arabidopsis thaliana OX=3702 GN=HSP81-2 PE=1 SV=1	0	19.609	10	6	9	6	1	728	83.1	5.03	23.33	6	0
High	Master Protein	Q9MBH2	Protein AIG2 B OS=Arabidopsis thaliana OX=3702 GN=AIG2B PE=2 SV=1	0	19.521	29	4	6	4	1	169	19.5	5.07	15.52	4	0
High	Master Protein	Q9LJR2	Lectin-like protein LEC OS=Arabidopsis thaliana OX=3702 GN=LEC PE=1 SV=1	0	19.481	22	4	7	4	1	271	29.7	8.87	28.33	4	0
High	Master Protein Candidate	P25819	Catalase-2 OS=Arabidopsis thaliana OX=3702 GN=CAT2 PE=1 SV=3	0	19.286	13	5	8	2	1	492	56.9	7.12	25.12	5	0
High	Master Protein	A0A1P8B564	Catalase OS=Arabidopsis thaliana OX=3702 GN=CAT2 PE=3 SV=1	0	19.286	13	5	8	2	1	492	56.9	7.12	25.12	5	0
High	Master Protein	F4K7D6	S-(hydroxymethyl)glutathione dehydrogenase OS=Arabidopsis thaliana OX=3702 GN=HOT5 PE=1 SV=1	0	19.263	11	3	6	3	1	391	42	6.95	21.04	3	0
High	Master Protein Candidate	Q96533	Alcohol dehydrogenase class-3 OS=Arabidopsis thaliana OX=3702 GN=ADH2 PE=1 SV=2	0	19.263	11	3	6	3	1	379	40.7	6.95	21.04	3	0
High	Master Protein	P49227	60S ribosomal protein L5-2 OS=Arabidopsis thaliana OX=3702 GN=RPL5B PE=2 SV=3	0	19.074	18	4	10	4	1	301	34.4	9.17	30.01	4	0
High	Master Protein	Q39258	V-type proton ATPase subunit E1 OS=Arabidopsis thaliana OX=3702 GN=VHA-E1 PE=1 SV=2	0	19.058	29	6	11	6	1	230	26	6.4	25.41	6	0
High	Master Protein	P42763	Dehydrin ERD14 OS=Arabidopsis thaliana OX=3702 GN=ERD14 PE=1 SV=1	0	19.027	24	4	11	3	1	185	20.8	5.48	30.27	4	0
High	Master Protein	P42644	14-3-3-like protein GF14 psi OS=Arabidopsis thaliana OX=3702 GN=GRF3 PE=1 SV=2	0	19.017	23	6	11	1	1	255	28.6	4.79	33.05	6	0
High	None	F4JUT8	Plasma-membrane associated cation-binding protein 1 OS=Arabidopsis thaliana OX=3702 GN=PCAP1 PE=1 SV=1	0	18.717	36	4	10	4	1	166	18.1	6.86	28.55	4	0
High	Master Protein	Q9LYG3	NADP-dependent malic enzyme 2 OS=Arabidopsis thaliana OX=3702 GN=NADP-ME2 PE=1 SV=1	0	18.716	13	5	9	5	1	588	64.4	6.42	32.47	5	0
High	Master Protein	P32961	Nitrilase 1 OS=Arabidopsis thaliana OX=3702 GN=NIT1 PE=1 SV=2	0	18.715	21	4	7	4	1	346	38.1	6.28	17.75	4	0
High	Master Protein	Q01667	Chlorophyll a-b binding protein 6, chloroplastic OS=Arabidopsis thaliana OX=3702 GN=LHCA1 PE=1 SV=1	0	18.675	10	3	11	3	1	241	26	6.68	28.67	3	0
High	Master Protein Candidate	A8MS75	Chlorophyll a-b binding protein, chloroplastic OS=Arabidopsis thaliana OX=3702 GN=LHCA1 PE=3 SV=1	0	18.675	11	3	11	3	1	213	23.2	7.43	28.67	3	0
High	Master Protein	Q9LTX9	Heat shock 70 kDa protein 7, chloroplastic OS=Arabidopsis thaliana OX=3702 GN=HSP70-7 PE=2 SV=1	0	18.66	10	5	7	1	1	718	77	5.3	21.92	5	0
High	Master Protein	Q9C5R8	2-Cys peroxiredoxin BAS1-like, chloroplastic OS=Arabidopsis thaliana OX=3702 GN=At5g06290 PE=2 SV=3	0	18.49	24	5	10	1	1	273	29.8	5.74	29.58	5	0
High	Master Protein Candidate	A0A1P8BD74	2-cysteine peroxiredoxin B OS=Arabidopsis thaliana OX=3702 GN=2-Cys Prx B PE=4 SV=1	0	18.49	27	5	10	1	1	245	26.7	8.38	29.58	5	0
High	Master Protein Candidate	O65396	Aminomethyltransferase, mitochondrial OS=Arabidopsis thaliana OX=3702 GN=GDCST PE=2 SV=1	0	18.413	15	5	8	5	1	408	44.4	8.37	26.61	5	0
High	Master Protein	A0A2H1ZEA9	Aminomethyltransferase OS=Arabidopsis thaliana OX=3702 GN=At1g11860 PE=3 SV=1	0	18.413	14	5	8	5	1	423	46.3	8.75	26.61	5	0
High	Master Protein	Q93VG5	40S ribosomal protein S8-1 OS=Arabidopsis thaliana OX=3702 GN=RPS8A PE=1 SV=1	0	18.142	17	4	6	4	1	222	25	10.32	17.85	4	0
High	Master Protein	P36210	50S ribosomal protein L12-1, chloroplastic OS=Arabidopsis thaliana OX=3702 GN=RPL12A PE=2 SV=1	0	18.028	24	4	10	4	1	191	20.1	5.64	30.5	4	0
High	Master Protein Candidate	P36212	50S ribosomal protein L12-3, chloroplastic OS=Arabidopsis thaliana OX=3702 GN=RPL12C PE=2 SV=2	0	18.028	25	4	10	4	1	187	19.7	5.64	30.5	4	0
High	Master Protein	P39207	Nucleoside diphosphate kinase 1 OS=Arabidopsis thaliana OX=3702 GN=NDK1 PE=1 SV=1	0	17.821	23	4	8	4	1	149	16.5	6.79	26.73	4	0
High	Master Protein	Q9S726	Probable ribose-5-phosphate isomerase 3, chloroplastic OS=Arabidopsis thaliana OX=3702 GN=RPI3 PE=1 SV=1	0	17.769	28	4	8	4	1	276	29.3	6.02	17.34	4	0
High	None	F4JM86	Catalase OS=Arabidopsis thaliana OX=3702 GN=CAT2 PE=3 SV=1	0	17.767	12	4	6	2	1	474	55	6.83	20.42	4	0
High	Master Protein	Q94BS2	Protein MET1, chloroplastic OS=Arabidopsis thaliana OX=3702 GN=MET1 PE=1 SV=1	0	17.76	8	2	5	2	1	335	37.4	8.12	21.8	2	0
High	Master Protein Candidate	Q9ZUT9	40S ribosomal protein S5-1 OS=Arabidopsis thaliana OX=3702 GN=RPS5A PE=1 SV=1	0	17.693	19	5	10	5	1	207	23	9.67	27.88	5	0
High	Master Protein	P51427	40S ribosomal protein S5-2 OS=Arabidopsis thaliana OX=3702 GN=RPS5B PE=1 SV=2	0	17.693	19	5	10	5	1	207	22.9	9.63	27.88	5	0
High	Master Protein	P19171	Basic endochitinase B OS=Arabidopsis thaliana OX=3702 GN=CHI-B PE=1 SV=3	0	17.421	11	2	5	2	1	335	36.2	7.61	17.94	2	0
High	Master Protein	Q9FNH6	NDR1/HIN1-like protein 3 OS=Arabidopsis thaliana OX=3702 GN=NHL3 PE=1 SV=1	0	17.34	17	4	7	4	1	231	25.9	9.2	21.54	4	0
High	Master Protein	P42761	Glutathione S-transferase F10 OS=Arabidopsis thaliana OX=3702 GN=GSTF10 PE=1 SV=3	0	17.325	25	5	9	5	1	215	24.2	5.67	27.09	5	0
High	Master Protein	Q9SE50	Beta-D-glucopyranosyl abscisate beta-glucosidase OS=Arabidopsis thaliana OX=3702 GN=BGLU18 PE=1 SV=2	0	17.293	10	5	11	5	1	528	60.4	7.21	26.79	5	0
High	Master Protein	O48549	40S ribosomal protein S6-1 OS=Arabidopsis thaliana OX=3702 GN=RPS6A PE=1 SV=2	0	17.216	27	5	8	5	1	250	28.4	10.61	24.49	5	0
High	Master Protein	Q56WD9	3-ketoacyl-CoA thiolase 2, peroxisomal OS=Arabidopsis thaliana OX=3702 GN=PED1 PE=1 SV=2	0	17.146	12	3	5	3	1	462	48.5	8.34	19.32	3	0
High	Master Protein	P94072	Germin-like protein subfamily 3 member 3 OS=Arabidopsis thaliana OX=3702 GN=GER3 PE=1 SV=1	0	17.038	11	1	4	1	1	211	21.8	6.76	20.11	1	0
High	Master Protein	P30184	Leucine aminopeptidase 1 OS=Arabidopsis thaliana OX=3702 GN=LAP1 PE=1 SV=1	0	17.008	12	4	7	2	1	520	54.5	5.92	24.18	4	2
High	Master Protein	Q39102	ATP-dependent zinc metalloprotease FTSH 1, chloroplastic OS=Arabidopsis thaliana OX=3702 GN=FTSH1 PE=1 SV=2	0	16.912	10	5	6	5	1	716	76.7	5.83	18.17	5	0
High	Master Protein Candidate	Q9FH02	ATP-dependent zinc metalloprotease FTSH 5, chloroplastic OS=Arabidopsis thaliana OX=3702 GN=FTSH5 PE=1 SV=1	0	16.912	10	5	6	5	1	704	75.2	5.49	18.17	5	0
High	Master Protein Candidate	A8MQA1	60S ribosomal protein L13 OS=Arabidopsis thaliana OX=3702 GN=BBC1 PE=1 SV=1	0	16.832	27	4	6	4	1	204	23.5	11	18.16	4	0
High	Master Protein	P41127	60S ribosomal protein L13-1 OS=Arabidopsis thaliana OX=3702 GN=RPL13B PE=1 SV=1	0	16.832	27	4	6	4	1	206	23.8	11.02	18.16	4	0
High	Master Protein	Q9S831	Photosystem I reaction center subunit IV A, chloroplastic OS=Arabidopsis thaliana OX=3702 GN=PSAE1 PE=1 SV=1	0	16.764	41	3	8	2	1	143	15	9.92	19.68	3	0
High	Master Protein	P56773	Cytochrome b6 OS=Arabidopsis thaliana OX=3702 GN=petB PE=1 SV=1	0	16.763	16	2	6	2	1	215	24.1	8.76	24.49	2	0
High	Master Protein	Q9SSA5	Peptidyl-prolyl cis-trans isomerase CYP38, chloroplastic OS=Arabidopsis thaliana OX=3702 GN=CYP38 PE=1 SV=1	0	16.675	15	4	4	4	1	437	48	5.16	14.72	4	0
High	Master Protein Candidate	Q39141	Chlorophyll a-b binding protein, chloroplastic OS=Arabidopsis thaliana OX=3702 GN=Lhb1B2 PE=2 SV=1	0	16.621	13	3	15	1	1	265	28	5.44	32.73	3	0
High	Master Protein Candidate	Q8VZ87	Chlorophyll a-b binding protein 3, chloroplastic OS=Arabidopsis thaliana OX=3702 GN=LHCB1.2 PE=1 SV=2	0	16.621	13	3	15	1	1	267	28.2	5.43	32.73	3	0
High	Master Protein Candidate	Q39142	Chlorophyll a-b binding protein, chloroplastic OS=Arabidopsis thaliana OX=3702 GN=Lhb1B1 PE=1 SV=1	0	16.621	13	3	15	1	1	266	28.2	5.27	32.73	3	0
High	Master Protein	P04778	Chlorophyll a-b binding protein 1, chloroplastic OS=Arabidopsis thaliana OX=3702 GN=LHCB1.3 PE=1 SV=1	0	16.621	13	3	15	1	1	267	28.2	5.66	32.73	3	0
High	Master Protein Candidate	F4JZ46	Ferredoxin--NADP reductase, chloroplastic OS=Arabidopsis thaliana OX=3702 GN=FNR1 PE=1 SV=1	0	16.616	26	5	10	4	1	262	29.7	6.15	32.27	5	0
High	Master Protein	Q9FKW6	Ferredoxin--NADP reductase, leaf isozyme 1, chloroplastic OS=Arabidopsis thaliana OX=3702 GN=LFNR1 PE=1 SV=1	0	16.616	19	5	10	4	1	360	40.3	8.13	32.27	5	1
High	Master Protein	P48491	Triosephosphate isomerase, cytosolic OS=Arabidopsis thaliana OX=3702 GN=CTIMC PE=1 SV=2	0	16.389	20	4	10	4	1	254	27.2	5.5	19.45	4	0
High	Master Protein	P60040	60S ribosomal protein L7-2 OS=Arabidopsis thaliana OX=3702 GN=RPL7B PE=1 SV=1	0	16.37	24	7	12	2	1	242	28.2	9.94	21.18	7	5
High	None	F4HUA0	GTP binding Elongation factor Tu family protein OS=Arabidopsis thaliana OX=3702 GN=At1g07930 PE=1 SV=1	0	16.361	14	4	8	4	1	372	41.3	9.23	24.41	4	0
High	Master Protein	P59259	Histone H4 OS=Arabidopsis thaliana OX=3702 GN=At1g07660 PE=1 SV=2	0	16.193	42	5	11	5	1	103	11.4	11.47	27.94	5	0
High	Master Protein	Q8VZJ2	Probable glucan endo-1,3-beta-glucosidase At4g16260 OS=Arabidopsis thaliana OX=3702 GN=At4g16260 PE=1 SV=1	0	16.08	22	5	8	5	1	344	37.7	6.84	27.68	5	0
High	Master Protein Candidate	A0A1P8B3U2	Glycosyl hydrolase superfamily protein OS=Arabidopsis thaliana OX=3702 GN=At4g16260 PE=3 SV=1	0	16.08	23	5	8	5	1	315	34.6	8.25	27.68	5	0
High	None	B3H6D7	Fructose-bisphosphate aldolase OS=Arabidopsis thaliana OX=3702 GN=FBA6 PE=3 SV=1	0	16.065	21	3	4	2	1	267	28.7	8.28	17.83	3	0
High	None	Q9S9N1	Heat shock 70 kDa protein 5 OS=Arabidopsis thaliana OX=3702 GN=HSP70-5 PE=2 SV=1	0	16.038	7	4	7	0	2	646	70.9	5.41	18.27	4	0
High	Master Protein	F4K5B9	Eukaryotic aspartyl protease family protein OS=Arabidopsis thaliana OX=3702 GN=MOJ9.20 PE=3 SV=1	0	15.926	8	3	8	3	1	455	48.7	9.64	24.01	3	0
High	Master Protein Candidate	A0A1P8AQY3	SHV3-like 2 OS=Arabidopsis thaliana OX=3702 GN=SVL2 PE=4 SV=1	0	15.916	11	5	7	5	1	569	62.2	5.08	17.2	5	0
High	Master Protein	F4HQ30	SHV3-like 2 OS=Arabidopsis thaliana OX=3702 GN=SVL2 PE=4 SV=1	0	15.916	8	5	7	5	1	785	86.3	5.22	17.2	5	0
High	Master Protein Candidate	Q7Y208	Glycerophosphodiester phosphodiesterase GDPDL1 OS=Arabidopsis thaliana OX=3702 GN=GDPDL1 PE=1 SV=2	0	15.916	8	5	7	5	1	763	83.7	5.17	17.2	5	0
High	Master Protein	P56778	Photosystem II CP43 reaction center protein OS=Arabidopsis thaliana OX=3702 GN=psbC PE=1 SV=3	0	15.908	11	4	7	4	1	473	51.8	7.2	25.05	4	0
High	Master Protein	O80934	Uncharacterized protein At2g37660, chloroplastic OS=Arabidopsis thaliana OX=3702 GN=At2g37660 PE=1 SV=2	0	15.458	20	3	7	3	1	325	34.9	8.31	22.56	3	0
High	Master Protein	Q9S7H1	Photosystem I reaction center subunit II-1, chloroplastic OS=Arabidopsis thaliana OX=3702 GN=psaD1 PE=1 SV=1	0	15.387	25	3	7	3	1	208	22.6	9.77	29.06	3	0
High	Master Protein Candidate	Q9SA56	Photosystem I reaction center subunit II-2, chloroplastic OS=Arabidopsis thaliana OX=3702 GN=PSAD2 PE=1 SV=1	0	15.387	25	3	7	3	1	204	22.3	9.77	29.06	3	0
High	Master Protein	O82662	Succinate--CoA ligase [ADP-forming] subunit beta, mitochondrial OS=Arabidopsis thaliana OX=3702 GN=At2g20420 PE=1 SV=1	0	15.337	11	4	7	4	1	421	45.3	6.71	19.23	4	0
High	Master Protein	Q96250	ATP synthase subunit gamma, mitochondrial OS=Arabidopsis thaliana OX=3702 GN=ATPC PE=1 SV=1	0	15.329	12	2	5	2	1	325	35.4	8.9	18.46	2	0
High	Master Protein	O04616	Protein CURVATURE THYLAKOID 1A, chloroplastic OS=Arabidopsis thaliana OX=3702 GN=CURT1A PE=1 SV=1	0	15.085	7	3	8	3	1	164	17.7	9.17	19.01	3	0
High	Master Protein	P25851	Fructose-1,6-bisphosphatase 1, chloroplastic OS=Arabidopsis thaliana OX=3702 GN=CFBP1 PE=1 SV=2	0	15.048	17	5	8	5	1	417	45.1	5.4	16.99	5	0
High	None	Q8LBI1	60S ribosomal protein L5-1 OS=Arabidopsis thaliana OX=3702 GN=ATL5 PE=1 SV=2	0	15.045	14	3	8	3	1	301	34.3	9.31	23.57	3	0
High	Master Protein Candidate	Q9LJE4	Chaperonin 60 subunit beta 2, chloroplastic OS=Arabidopsis thaliana OX=3702 GN=CPN60B2 PE=1 SV=1	0	15.035	10	4	6	2	1	596	63.3	5.73	22.28	4	0
High	Master Protein	P21240	Chaperonin 60 subunit beta 1, chloroplastic OS=Arabidopsis thaliana OX=3702 GN=CPN60B1 PE=1 SV=3	0	15.035	10	4	6	2	1	600	63.8	6.51	22.28	4	2
High	Master Protein	Q96292	Actin-2 OS=Arabidopsis thaliana OX=3702 GN=ACT2 PE=1 SV=1	0	14.628	15	4	7	3	1	377	41.9	5.58	16.23	4	1
High	Master Protein Candidate	Q96293	Actin-8 OS=Arabidopsis thaliana OX=3702 GN=ACT8 PE=1 SV=2	0	14.628	15	4	7	3	1	377	41.8	5.58	16.23	4	0
High	None	Q42560	Aconitate hydratase 1 OS=Arabidopsis thaliana OX=3702 GN=ACO1 PE=1 SV=2	0	14.589	4	3	7	2	1	898	98.1	6.4	16.7	3	0
High	Master Protein	A0A1P8ASL8	GDSL-like Lipase/Acylhydrolase superfamily protein OS=Arabidopsis thaliana OX=3702 GN=At1g29670 PE=3 SV=1	0	14.451	8	2	4	2	1	431	47.7	9.17	13.56	2	0
High	Master Protein Candidate	Q9C7N4	GDSL esterase/lipase At1g29670 OS=Arabidopsis thaliana OX=3702 GN=At1g29670 PE=2 SV=1	0	14.451	9	2	4	2	1	363	39.8	8.54	13.56	2	0
High	Master Protein Candidate	P51407	60S acidic ribosomal protein P2-1 OS=Arabidopsis thaliana OX=3702 GN=RPP2A PE=3 SV=2	0	14.45	39	2	5	2	1	115	11.4	4.61	18.41	2	0
High	Master Protein Candidate	A0A1P8B2C7	60S acidic ribosomal protein family OS=Arabidopsis thaliana OX=3702 GN=At2g27720 PE=3 SV=1	0	14.45	49	2	5	2	1	91	9.2	4.41	18.41	2	0
High	Master Protein	F4IGR4	60S acidic ribosomal protein family OS=Arabidopsis thaliana OX=3702 GN=At2g27720 PE=3 SV=1	0	14.45	35	2	5	2	1	130	13	4.53	18.41	2	0
High	Master Protein Candidate	F4IGR5	60S acidic ribosomal protein family OS=Arabidopsis thaliana OX=3702 GN=At2g27720 PE=3 SV=1	0	14.45	35	2	5	2	1	127	12.7	4.56	18.41	2	0
High	None	Q9S7E9	Glutamate--glyoxylate aminotransferase 2 OS=Arabidopsis thaliana OX=3702 GN=GGAT2 PE=1 SV=1	0	14.401	12	3	5	3	1	481	53.4	6.58	15.19	3	0
High	Master Protein Candidate	P92549	ATP synthase subunit alpha, mitochondrial OS=Arabidopsis thaliana OX=3702 GN=ATPA PE=1 SV=2	0	14.367	11	5	9	5	1	507	55	6.61	22.35	5	0
High	Master Protein	A0A2P2CLF9	ATP synthase subunit alpha OS=Arabidopsis thaliana OX=3702 GN=atp1 PE=3 SV=1	0	14.367	11	5	9	5	1	507	55.1	6.33	22.35	5	0
High	Master Protein	F4IT48	Ribosomal protein L30/L7 family protein OS=Arabidopsis thaliana OX=3702 GN=At2g44120 PE=4 SV=1	0	14.277	20	6	11	1	1	247	28.5	9.88	18.03	6	0
High	Master Protein Candidate	P60039	60S ribosomal protein L7-3 OS=Arabidopsis thaliana OX=3702 GN=RPL7C PE=2 SV=1	0	14.277	20	6	11	1	1	242	27.9	9.94	18.03	6	0
High	Master Protein	Q96520	Peroxidase 12 OS=Arabidopsis thaliana OX=3702 GN=PER12 PE=1 SV=1	0	14.211	15	4	6	4	1	358	39.5	8.28	18.06	4	0
High	Master Protein Candidate	Q9C9C6	60S ribosomal protein L6-2 OS=Arabidopsis thaliana OX=3702 GN=RPL6B PE=2 SV=1	0	14.207	13	3	8	3	1	233	26	10.17	23.95	3	0
High	Master Protein	Q9C9C5	60S ribosomal protein L6-3 OS=Arabidopsis thaliana OX=3702 GN=RPL6C PE=2 SV=1	0	14.207	13	3	8	3	1	233	26.1	10.17	23.95	3	0
High	Master Protein Candidate	Q9FZ76	60S ribosomal protein L6-1 OS=Arabidopsis thaliana OX=3702 GN=RPL6A PE=2 SV=1	0	14.207	13	3	8	3	1	233	26.1	10.1	23.95	3	0
High	Master Protein	O82291	Probable plastid-lipid-associated protein 3, chloroplastic OS=Arabidopsis thaliana OX=3702 GN=PAP3 PE=1 SV=1	0	14.103	15	4	8	4	1	376	40.5	4.55	21.95	4	0
High	Master Protein	Q9ZVL6	UPF0603 protein At1g54780, chloroplastic OS=Arabidopsis thaliana OX=3702 GN=At1g54780 PE=1 SV=1	0	14.026	16	4	7	4	1	285	31.1	8.84	24.65	4	0
High	Master Protein Candidate	P11574	V-type proton ATPase subunit B1 OS=Arabidopsis thaliana OX=3702 GN=VHA-B1 PE=2 SV=2	0	13.722	9	4	7	4	1	486	54.1	5.1	21.52	4	0
High	Master Protein	Q8W4E2	V-type proton ATPase subunit B3 OS=Arabidopsis thaliana OX=3702 GN=VHA-B3 PE=2 SV=1	0	13.722	9	4	7	4	1	487	54.3	5.1	21.52	4	0
High	Master Protein Candidate	F4K5C7	40S ribosomal protein S4 OS=Arabidopsis thaliana OX=3702 GN=At5g07090 PE=3 SV=1	0	13.62	22	5	7	5	1	244	27.7	9.99	18.33	5	0
High	Master Protein Candidate	Q8VYK6	40S ribosomal protein S4-3 OS=Arabidopsis thaliana OX=3702 GN=RPS4D PE=2 SV=2	0	13.62	21	5	7	5	1	262	29.8	10.21	18.33	5	0
High	Master Protein Candidate	Q93VH9	40S ribosomal protein S4-1 OS=Arabidopsis thaliana OX=3702 GN=RPS4A PE=2 SV=1	0	13.62	21	5	7	5	1	261	29.8	10.17	18.33	5	0
High	Master Protein	P49204	40S ribosomal protein S4-2 OS=Arabidopsis thaliana OX=3702 GN=RPS4B PE=2 SV=4	0	13.62	21	5	7	5	1	262	29.9	10.17	18.33	5	0
High	Master Protein	Q94A28	Aconitate hydratase 2, mitochondrial OS=Arabidopsis thaliana OX=3702 GN=ACO2 PE=1 SV=3	0	13.535	3	2	4	1	1	995	108.4	7.15	14.14	2	0
High	Master Protein	Q940G5	Glucose-6-phosphate 1-epimerase OS=Arabidopsis thaliana OX=3702 GN=At4g25900 PE=2 SV=1	0	13.452	18	6	8	6	1	318	36.2	9.66	15.19	6	0
High	None	F4I577	Monodehydroascorbate reductase 6 OS=Arabidopsis thaliana OX=3702 GN=MDAR6 PE=4 SV=1	0	13.289	7	2	4	2	1	416	45	8.59	12.43	2	0
High	Master Protein Candidate	P48349	14-3-3-like protein GF14 lambda OS=Arabidopsis thaliana OX=3702 GN=GRF6 PE=1 SV=1	0	13.221	22	4	8	2	1	248	28	4.84	20.94	4	0
High	Master Protein Candidate	F4KGV2	G-box regulating factor 6 OS=Arabidopsis thaliana OX=3702 GN=GRF6 PE=3 SV=1	0	13.221	22	4	8	2	1	246	27.7	4.89	20.94	4	0
High	Master Protein	F4KGV5	G-box regulating factor 6 OS=Arabidopsis thaliana OX=3702 GN=GRF6 PE=3 SV=1	0	13.221	21	4	8	2	1	258	29.1	5	20.94	4	0
High	Master Protein	Q56WK6	Patellin-1 OS=Arabidopsis thaliana OX=3702 GN=PATL1 PE=1 SV=2	0	13.218	11	5	10	3	1	573	64	4.83	12.28	5	2
High	Master Protein	O49006	Pectinesterase/pectinesterase inhibitor 3 OS=Arabidopsis thaliana OX=3702 GN=PME3 PE=1 SV=2	0	12.992	7	2	4	2	1	592	64.2	8.87	8.49	2	0
High	Master Protein	P53492	Actin-7 OS=Arabidopsis thaliana OX=3702 GN=ACT7 PE=1 SV=1	0	12.897	12	3	6	2	1	377	41.7	5.49	14.03	3	0
High	Master Protein	Q9T076	Early nodulin-like protein 2 OS=Arabidopsis thaliana OX=3702 GN=At4g27520 PE=1 SV=1	0	12.874	12	3	5	3	1	349	35	9.32	20.14	3	0
High	Master Protein Candidate	Q9M339	40S ribosomal protein S3-2 OS=Arabidopsis thaliana OX=3702 GN=RPS3B PE=1 SV=1	0	12.793	16	3	5	3	1	249	27.3	9.54	13.25	3	0
High	Master Protein	Q9SIP7	40S ribosomal protein S3-1 OS=Arabidopsis thaliana OX=3702 GN=RPS3A PE=1 SV=1	0	12.793	16	3	5	3	1	250	27.5	9.54	13.25	3	0
High	Master Protein	Q96266	Glutathione S-transferase F8, chloroplastic OS=Arabidopsis thaliana OX=3702 GN=GSTF8 PE=1 SV=3	0	12.736	17	3	6	3	1	263	29.2	8.5	19.25	3	0
High	Master Protein	P31167	ADP,ATP carrier protein 1, mitochondrial OS=Arabidopsis thaliana OX=3702 GN=AAC1 PE=1 SV=2	0	12.71	11	4	7	4	1	381	41.4	9.83	19.54	4	0
High	Master Protein	P27202	Photosystem II 10 kDa polypeptide, chloroplastic OS=Arabidopsis thaliana OX=3702 GN=PSBR PE=1 SV=1	0	12.551	11	2	5	2	1	140	14.6	9.63	13.36	2	0
High	Master Protein	Q38946	Glutamate dehydrogenase 2 OS=Arabidopsis thaliana OX=3702 GN=GDH2 PE=1 SV=1	0	12.442	10	4	5	3	1	411	44.7	6.54	11.97	4	1
High	Master Protein	Q944P7	Leucine aminopeptidase 2, chloroplastic OS=Arabidopsis thaliana OX=3702 GN=LAP2 PE=2 SV=2	0	12.357	8	3	5	1	1	583	61.3	7.08	14.4	3	0
High	Master Protein	P33154	Pathogenesis-related protein 1 OS=Arabidopsis thaliana OX=3702 GN=At2g14610 PE=1 SV=1	0	12.309	17	2	6	2	1	161	17.7	8.84	20.75	2	0
High	Master Protein	Q42403	Thioredoxin H3 OS=Arabidopsis thaliana OX=3702 GN=TRX3 PE=1 SV=1	0	12.265	31	3	6	3	1	118	13.1	5.14	21.49	3	0
High	Master Protein	Q9ZVA2	EP1-like glycoprotein 2 OS=Arabidopsis thaliana OX=3702 GN=At1g78830 PE=1 SV=1	0	12.258	17	5	6	5	1	455	50.3	8.47	14.56	5	0
High	Master Protein Candidate	O04204	60S acidic ribosomal protein P0-1 OS=Arabidopsis thaliana OX=3702 GN=RPP0A PE=1 SV=1	0	12.055	8	2	6	2	1	317	33.6	5.29	17.04	2	0
High	Master Protein Candidate	A8MQR4	60S acidic ribosomal protein P0 OS=Arabidopsis thaliana OX=3702 GN=At3g09200 PE=1 SV=1	0	12.055	9	2	6	2	1	287	30.6	4.84	17.04	2	0
High	Master Protein	P57691	60S acidic ribosomal protein P0-3 OS=Arabidopsis thaliana OX=3702 GN=RPP0C PE=1 SV=1	0	12.055	8	2	6	2	1	323	34.4	5.15	17.04	2	0
High	Master Protein Candidate	Q42112	60S acidic ribosomal protein P0-2 OS=Arabidopsis thaliana OX=3702 GN=RPP0B PE=1 SV=2	0	12.055	8	2	6	2	1	320	34.1	5.07	17.04	2	0
High	None	A0A1I9LTP2	Cysteine synthase C1 OS=Arabidopsis thaliana OX=3702 GN=CYSC1 PE=4 SV=1	0	12.051	13	3	4	3	1	333	36.3	8.28	12.9	3	0
High	Master Protein	A0A1P8AVY3	Triacylglycerol lipase-like 1 OS=Arabidopsis thaliana OX=3702 GN=TLL1 PE=4 SV=1	0	12.017	9	4	6	4	1	504	57.7	9.16	15.74	4	0
High	Master Protein Candidate	Q8L7S1	At1g45200 OS=Arabidopsis thaliana OX=3702 GN=TLL1 PE=2 SV=1	0	12.017	9	4	6	4	1	479	54.7	8.98	15.74	4	0
High	Master Protein Candidate	F4HRB4	Triacylglycerol lipase-like 1 OS=Arabidopsis thaliana OX=3702 GN=TLL1 PE=4 SV=1	0	12.017	11	4	6	4	1	387	44.1	9.03	15.74	4	0
High	Master Protein	P49209	60S ribosomal protein L9-1 OS=Arabidopsis thaliana OX=3702 GN=RPL9B PE=1 SV=3	0	12.009	15	2	3	2	1	194	22	9.45	10.15	2	0
High	Master Protein	Q9ZST4	Nitrogen regulatory protein P-II homolog OS=Arabidopsis thaliana OX=3702 GN=GLB1 PE=1 SV=1	0	11.902	20	3	4	3	1	196	21.3	9.06	13.38	3	0
High	None	O49344	Putative oxygen-evolving enhancer protein 2-2 OS=Arabidopsis thaliana OX=3702 GN=PSBP2 PE=5 SV=3	0	11.803	17	1	4	1	1	125	13.4	6.07	15.33	1	0
High	Master Protein	Q9FVT2	Probable elongation factor 1-gamma 2 OS=Arabidopsis thaliana OX=3702 GN=At1g57720 PE=1 SV=1	0	11.779	5	2	4	2	1	413	46.4	5.71	14.61	2	0
High	Master Protein	Q9ZRW8	Glutathione S-transferase U19 OS=Arabidopsis thaliana OX=3702 GN=GSTU19 PE=1 SV=1	0	11.747	21	4	7	4	1	219	25.6	6.04	16.3	4	0
High	Master Protein	Q9ZT91	Elongation factor Tu, mitochondrial OS=Arabidopsis thaliana OX=3702 GN=TUFA PE=1 SV=1	0	11.681	7	2	5	1	1	454	49.4	6.7	13.75	2	0
High	None	A8MS03	Ribosomal protein S6 OS=Arabidopsis thaliana OX=3702 GN=RPS6 PE=1 SV=1	0	11.652	22	3	5	3	1	188	21.4	11.46	15.96	3	0
High	Master Protein	Q9FWR4	Glutathione S-transferase DHAR1, mitochondrial OS=Arabidopsis thaliana OX=3702 GN=DHAR1 PE=1 SV=1	0	11.615	22	4	8	4	1	213	23.6	5.91	21.74	4	0
High	Master Protein	Q9FPF0	Protein DJ-1 homolog A OS=Arabidopsis thaliana OX=3702 GN=DJ1A PE=1 SV=1	0	11.488	10	3	4	3	1	392	41.8	5.41	12.72	3	0
High	Master Protein	A0A1P8AV08	Aspartic proteinase A1 OS=Arabidopsis thaliana OX=3702 GN=APA1 PE=3 SV=1	0	11.421	8	3	4	3	1	517	56	5.67	11.14	3	0
High	Master Protein Candidate	O65390	Aspartic proteinase A1 OS=Arabidopsis thaliana OX=3702 GN=APA1 PE=1 SV=1	0	11.421	8	3	4	3	1	506	54.6	5.54	11.14	3	0
High	Master Protein Candidate	C0Z2A8	Ferredoxin--NADP reductase, chloroplastic OS=Arabidopsis thaliana OX=3702 GN=FNR2 PE=2 SV=1	0	11.294	12	2	6	1	1	255	28.7	6.02	19.61	2	0
High	Master Protein	Q8W493	Ferredoxin--NADP reductase, leaf isozyme 2, chloroplastic OS=Arabidopsis thaliana OX=3702 GN=LFNR2 PE=1 SV=1	0	11.294	8	2	6	1	1	369	41.1	8.31	19.61	2	0
High	Master Protein	Q9S7W1	Chlorophyll a-b binding protein CP29.3, chloroplastic OS=Arabidopsis thaliana OX=3702 GN=LHCB4.3 PE=2 SV=1	0	11.223	14	3	8	2	1	276	30.2	5.36	16.57	3	0
High	Master Protein	Q949U7	Peroxiredoxin-2E, chloroplastic OS=Arabidopsis thaliana OX=3702 GN=PRXIIE PE=1 SV=2	0	11.089	13	2	3	2	1	234	24.7	9.03	11.83	2	0
High	Master Protein	O24603	Endochitinase CHI OS=Arabidopsis thaliana OX=3702 GN=CHI PE=2 SV=1	0	11.006	15	3	6	3	1	277	29.8	6.05	19.27	3	0
High	Master Protein	P55229	Glucose-1-phosphate adenylyltransferase large subunit 1, chloroplastic OS=Arabidopsis thaliana OX=3702 GN=ADG2 PE=1 SV=3	0	10.977	8	3	4	3	1	522	57.6	7.91	9.87	3	0
High	Master Protein	Q9M5K3	Dihydrolipoyl dehydrogenase 1, mitochondrial OS=Arabidopsis thaliana OX=3702 GN=LPD1 PE=1 SV=2	0	10.884	8	3	4	3	1	507	54	7.4	11.79	3	0
High	Master Protein	Q39241	Thioredoxin H5 OS=Arabidopsis thaliana OX=3702 GN=TRX5 PE=1 SV=1	0	10.879	31	3	6	3	1	118	13.1	5.27	19.03	3	0
High	Master Protein	A0A1P8B5H3	Chloroplast thylakoid lumen protein OS=Arabidopsis thaliana OX=3702 GN=At4g02530 PE=4 SV=1	0	10.856	17	2	4	2	1	266	29.7	9.35	19.37	2	0
High	Master Protein Candidate	O22773	Thylakoid lumenal 16.5 kDa protein, chloroplastic OS=Arabidopsis thaliana OX=3702 GN=At4g02530 PE=1 SV=3	0	10.856	21	2	4	2	1	216	23.6	8.51	19.37	2	0
High	Master Protein	Q9SEH3	Ras-related protein RABD2c OS=Arabidopsis thaliana OX=3702 GN=RABD2C PE=1 SV=1	0	10.827	22	3	5	1	1	202	22.3	5.43	15.43	3	0
High	Master Protein	Q9M7T0	Peroxiredoxin-2F, mitochondrial OS=Arabidopsis thaliana OX=3702 GN=PRXIIF PE=1 SV=2	0	10.813	20	3	5	3	1	201	21.4	8.9	15.39	3	0
High	None	F4IMB5	ATPase, F1 complex, alpha subunit protein OS=Arabidopsis thaliana OX=3702 GN=At2g07698 PE=3 SV=1	0	10.805	4	3	6	3	1	777	85.9	5.57	16.74	3	0
High	None	F4KGU2	Ribosomal protein S6e OS=Arabidopsis thaliana OX=3702 GN=EMB3010 PE=1 SV=1	0	10.761	26	4	6	4	1	197	22.1	10.84	15.07	4	0
High	None	P51430	40S ribosomal protein S6-2 OS=Arabidopsis thaliana OX=3702 GN=RPS6B PE=1 SV=3	0	10.761	20	4	6	4	1	249	28.1	10.83	15.07	4	0
High	Master Protein	Q9STT3	Aldose 1-epimerase OS=Arabidopsis thaliana OX=3702 GN=T23J7.130 PE=2 SV=1	0	10.712	6	1	4	1	1	358	39.7	9.07	16.11	1	0
High	Master Protein	Q9ZVA4	EP1-like glycoprotein 3 OS=Arabidopsis thaliana OX=3702 GN=At1g78850 PE=1 SV=1	0	10.647	9	3	5	3	1	441	49	7.65	16.2	3	0
High	Master Protein Candidate	Q9FF52	60S ribosomal protein L12-3 OS=Arabidopsis thaliana OX=3702 GN=RPL12C PE=2 SV=1	0	10.586	22	3	6	3	1	166	17.8	8.92	18.12	3	0
High	Master Protein Candidate	Q9LFH5	60S ribosomal protein L12-2 OS=Arabidopsis thaliana OX=3702 GN=RPL12B PE=1 SV=1	0	10.586	22	3	6	3	1	166	18	8.97	18.12	3	0
High	Master Protein	P50883	60S ribosomal protein L12-1 OS=Arabidopsis thaliana OX=3702 GN=RPL12A PE=2 SV=2	0	10.586	22	3	6	3	1	166	17.9	8.97	18.12	3	0
High	None	F4KGQ0	Fructose-bisphosphate aldolase 4, cytosolic OS=Arabidopsis thaliana OX=3702 GN=FBA4 PE=2 SV=1	0	10.544	4	2	6	0	3	393	42.9	8.91	14.14	2	0
High	None	F4J8V9	Actin 2 OS=Arabidopsis thaliana OX=3702 GN=ACT2 PE=1 SV=1	0	10.534	11	3	5	2	1	371	41.2	5.69	11.77	3	0
High	Master Protein	Q9SRH6	Hypersensitive-induced response protein 3 OS=Arabidopsis thaliana OX=3702 GN=HIR3 PE=1 SV=1	0	10.511	12	3	5	3	1	285	31.3	5.85	16.04	3	0
High	Master Protein	O48737	Thioredoxin M1, chloroplastic OS=Arabidopsis thaliana OX=3702 GN=At1g03680 PE=2 SV=1	0	10.486	16	2	4	2	1	179	19.7	8.95	15.62	2	0
High	Master Protein Candidate	A0A1I9LMX6	Beta glucosidase 43 OS=Arabidopsis thaliana OX=3702 GN=BGLU43 PE=3 SV=1	0	10.472	8	4	5	4	1	495	56.5	6.64	11.99	4	0
High	Master Protein Candidate	Q9LV34	Beta-glucosidase 43 OS=Arabidopsis thaliana OX=3702 GN=BGLU43 PE=2 SV=2	0	10.472	8	4	5	4	1	501	57.2	7.25	11.99	4	0
High	Master Protein	Q9LV33	Beta-glucosidase 44 OS=Arabidopsis thaliana OX=3702 GN=BGLU44 PE=2 SV=1	0	10.472	8	4	5	4	1	512	58.9	9.42	11.99	4	0
High	Master Protein	Q9M2U7	AT3g54400/T12E18_90 OS=Arabidopsis thaliana OX=3702 GN=T12E18_90 PE=2 SV=1	0	10.472	8	3	6	3	1	425	45.4	9.09	16.6	3	0
High	None	F4INR3	Cytosol aminopeptidase family protein OS=Arabidopsis thaliana OX=3702 GN=LAP1 PE=1 SV=1	0	10.447	9	3	5	1	1	484	50.6	6.05	16.49	3	0
High	Master Protein	Q9ASV6	30S ribosomal protein S20, chloroplastic OS=Arabidopsis thaliana OX=3702 GN=RPS20 PE=2 SV=1	0	10.427	17	3	5	3	1	202	21.8	10.13	14.19	3	0
High	Master Protein	P83755	Photosystem II protein D1 OS=Arabidopsis thaliana OX=3702 GN=psbA PE=1 SV=2	0	10.387	8	2	3	2	1	353	38.9	5.25	10.16	2	0
High	Master Protein Candidate	O80860	ATP-dependent zinc metalloprotease FTSH 2, chloroplastic OS=Arabidopsis thaliana OX=3702 GN=FTSH2 PE=1 SV=1	0	10.373	7	4	7	4	1	695	74.1	6.35	12.41	4	0
High	Master Protein	A0A1P8AXC1	FtsH extracellular protease family OS=Arabidopsis thaliana OX=3702 GN=VAR2 PE=3 SV=1	0	10.373	7	4	7	4	1	699	74.6	6.35	12.41	4	0
High	Master Protein	Q06738	Low-temperature-induced 78 kDa protein OS=Arabidopsis thaliana OX=3702 GN=RD29A PE=1 SV=2	0	10.371	7	3	5	3	1	710	77.8	4.54	5.99	3	0
High	Master Protein	C0Z361	Chaperonin 60 subunit beta 3, chloroplastic OS=Arabidopsis thaliana OX=3702 GN=CPN60B3 PE=1 SV=1	0	10.347	6	3	4	1	1	597	63.3	5.87	13.41	3	0
High	None	A8MRV1	Histone H4 OS=Arabidopsis thaliana OX=3702 GN=At1g07660 PE=1 SV=1	0	10.343	36	4	7	4	1	86	9.4	11.21	16.67	4	0
High	Master Protein	Q9LSV0	Glyoxylate/succinic semialdehyde reductase 1 OS=Arabidopsis thaliana OX=3702 GN=GLYR1 PE=1 SV=1	0	10.263	13	2	3	2	1	289	30.7	6.13	9.64	2	0
High	Master Protein Candidate	O81742	Beta-adaptin-like protein C OS=Arabidopsis thaliana OX=3702 GN=BETAC-AD PE=1 SV=2	0	10.112	4	2	3	2	1	893	99	5.02	10.52	2	0
High	Master Protein Candidate	Q9SUS3	Beta-adaptin-like protein B OS=Arabidopsis thaliana OX=3702 GN=BETAB-AD PE=1 SV=1	0	10.112	4	2	3	2	1	894	99.3	5.05	10.52	2	0
High	Master Protein	F4JNZ8	Beta-adaptin-like protein OS=Arabidopsis thaliana OX=3702 GN=At4g11380 PE=1 SV=1	0	10.112	4	2	3	2	1	916	101.9	5.03	10.52	2	0
High	Master Protein	Q8H0U5	Protein TIC 62, chloroplastic OS=Arabidopsis thaliana OX=3702 GN=TIC62 PE=1 SV=1	0	10.065	8	2	4	2	1	641	68.3	8.1	4.98	2	0
High	Master Protein	Q9LXC9	Soluble inorganic pyrophosphatase 6, chloroplastic OS=Arabidopsis thaliana OX=3702 GN=PPA6 PE=1 SV=1	0	10.052	11	3	5	3	1	300	33.4	6.01	14.06	3	0
High	Master Protein	P94014	Germin-like protein subfamily 2 member 1 OS=Arabidopsis thaliana OX=3702 GN=GLP4 PE=2 SV=2	0	10.048	11	2	5	2	1	219	22.9	8.44	9.34	2	0
High	Master Protein	O22527	Chlorophyllase-1 OS=Arabidopsis thaliana OX=3702 GN=CLH1 PE=1 SV=1	0	9.973	11	2	5	2	1	324	34.8	5.74	15.65	2	0
High	Master Protein	P56779	Cytochrome b559 subunit alpha OS=Arabidopsis thaliana OX=3702 GN=psbE PE=1 SV=4	0	9.891	37	3	6	3	1	83	9.4	4.94	15.97	3	0
High	Master Protein	O82514	Adenylate kinase 4 OS=Arabidopsis thaliana OX=3702 GN=ADK1 PE=1 SV=2	0	9.881	19	3	4	3	1	246	26.9	7.36	8.64	3	0
High	Master Protein Candidate	A0A1P8APU0	Thylakoidal ascorbate peroxidase OS=Arabidopsis thaliana OX=3702 GN=TAPX PE=3 SV=1	0	9.814	9	2	4	2	1	421	45.6	7.84	13.12	2	0
High	Master Protein	Q42593	L-ascorbate peroxidase T, chloroplastic OS=Arabidopsis thaliana OX=3702 GN=APXT PE=2 SV=2	0	9.814	9	2	4	2	1	426	46.1	7.28	13.12	2	0
High	Master Protein	Q07488	Blue copper protein OS=Arabidopsis thaliana OX=3702 GN=BCB PE=2 SV=2	0	9.741	13	2	4	2	1	196	20	4.82	8.6	2	0
High	Master Protein	Q9LDN9	Peroxidase 37 OS=Arabidopsis thaliana OX=3702 GN=PER37 PE=2 SV=1	0	9.7	11	2	4	2	1	346	38.2	7.64	13.84	2	0
High	Master Protein Candidate	A0A219HZH3	Glucose-6-phosphate/phosphate translocator-like protein OS=Arabidopsis thaliana OX=3702 GN=APE2 PE=1 SV=1	0	9.678	5	2	5	2	1	399	43.5	9.79	13.42	2	0
High	Master Protein	A0A219I0W9	Glucose-6-phosphate/phosphate translocator-like protein OS=Arabidopsis thaliana OX=3702 GN=APE2 PE=1 SV=1	0	9.678	5	2	5	2	1	415	45.2	9.66	13.42	2	0
High	Master Protein Candidate	Q9ZSR7	Triose phosphate/phosphate translocator TPT, chloroplastic OS=Arabidopsis thaliana OX=3702 GN=TPT PE=1 SV=1	0	9.678	5	2	5	2	1	410	44.6	9.74	13.42	2	0
High	Master Protein Candidate	A0A219HYB6	Glucose-6-phosphate/phosphate translocator-like protein OS=Arabidopsis thaliana OX=3702 GN=APE2 PE=4 SV=1	0	9.678	7	2	5	2	1	297	32.7	9.45	13.42	2	0
High	Master Protein	O23708	Proteasome subunit alpha type-2-A OS=Arabidopsis thaliana OX=3702 GN=PAB1 PE=1 SV=1	0	9.656	20	3	5	3	1	235	25.7	5.69	14.84	3	0
High	Master Protein Candidate	Q8L4A7	Proteasome subunit alpha type-2-B OS=Arabidopsis thaliana OX=3702 GN=PAB2 PE=1 SV=1	0	9.656	20	3	5	3	1	235	25.7	5.69	14.84	3	0
High	Master Protein Candidate	B3H778	Arginosuccinate synthase family OS=Arabidopsis thaliana OX=3702 GN=At4g24830 PE=1 SV=1	0	9.628	7	2	5	2	1	450	49	7.72	16.36	2	0
High	Master Protein	Q9SZX3	Argininosuccinate synthase, chloroplastic OS=Arabidopsis thaliana OX=3702 GN=At4g24830 PE=1 SV=3	0	9.628	6	2	5	2	1	494	53.8	6.67	16.36	2	0
High	Master Protein	B9DG21	Aspartate aminotransferase OS=Arabidopsis thaliana OX=3702 GN=ASP5 PE=1 SV=1	0	9.602	6	2	5	2	1	462	50.9	7.53	11.3	2	0
High	Master Protein Candidate	P46248	Aspartate aminotransferase, chloroplastic OS=Arabidopsis thaliana OX=3702 GN=ASP5 PE=1 SV=2	0	9.602	6	2	5	2	1	453	49.8	8.15	11.3	2	0
High	Master Protein Candidate	F4JTH0	Aspartate aminotransferase OS=Arabidopsis thaliana OX=3702 GN=ASP5 PE=1 SV=1	0	9.602	6	2	5	2	1	448	49.3	7.87	11.3	2	0
High	Master Protein	Q9LK72	Lectin-like protein At3g16530 OS=Arabidopsis thaliana OX=3702 GN=At3g16530 PE=1 SV=1	0	9.595	13	3	4	3	1	276	30.5	7.55	10.47	3	0
High	Master Protein	Q9FPJ4	Ras-related protein RABD2b OS=Arabidopsis thaliana OX=3702 GN=RABD2B PE=2 SV=1	0	9.575	22	3	4	1	1	202	22.3	5.43	12.21	3	2
High	Master Protein	O22126	Fasciclin-like arabinogalactan protein 8 OS=Arabidopsis thaliana OX=3702 GN=FLA8 PE=2 SV=1	0	9.571	8	3	5	3	1	420	43	5.68	14.9	3	0
High	None	P40941	ADP,ATP carrier protein 2, mitochondrial OS=Arabidopsis thaliana OX=3702 GN=AAC2 PE=1 SV=2	0	9.561	8	3	5	3	1	385	41.7	9.79	14.4	3	0
High	Master Protein	Q38900	Peptidyl-prolyl cis-trans isomerase CYP19-1 OS=Arabidopsis thaliana OX=3702 GN=CYP19-1 PE=2 SV=1	0	9.547	22	3	7	2	1	173	18.5	8.43	22.74	3	0
High	Master Protein	Q9M9W1	60S ribosomal protein L22-2 OS=Arabidopsis thaliana OX=3702 GN=RPL22B PE=2 SV=1	0	9.538	19	3	4	1	1	124	14	9.55	9.92	3	0
High	Master Protein	P0DKC4	Phosphoglycolate phosphatase 1B, chloroplastic OS=Arabidopsis thaliana OX=3702 GN=PGLP1B PE=1 SV=1	0	9.51	12	3	5	3	1	362	39.7	7.25	11.34	3	0
High	None	Q9T0P4	Ferredoxin-dependent glutamate synthase 2, chloroplastic OS=Arabidopsis thaliana OX=3702 GN=GLU2 PE=1 SV=2	0	9.447	1	1	2	1	1	1629	177.6	7.01	6.41	1	0
High	Master Protein	Q56WN1	Glutamine synthetase cytosolic isozyme 1-1 OS=Arabidopsis thaliana OX=3702 GN=GLN1-1 PE=1 SV=2	0	9.355	8	2	5	2	1	356	39.1	5.47	11.46	2	0
High	Master Protein	O04496	Aspartyl protease AED3 OS=Arabidopsis thaliana OX=3702 GN=AED3 PE=1 SV=1	0	9.235	6	2	3	2	1	449	47.6	7.52	12.42	2	0
High	None	Q0WNZ5	5-methyltetrahydropteroyltriglutamate--homocysteine methyltransferase 3, chloroplastic OS=Arabidopsis thaliana OX=3702 GN=MS3 PE=1 SV=1	0	9.235	3	2	4	0	2	812	90.5	8.05	11.93	2	0
High	Master Protein	F4JLV7	Bifunctional inhibitor/lipid-transfer protein/seed storage 2S albumin superfamily protein OS=Arabidopsis thaliana OX=3702 GN=At4g22505 PE=4 SV=1	0	9.231	5	2	3	2	1	530	55.2	12.4	11.33	2	0
High	None	F4J4W3	40S ribosomal protein SA OS=Arabidopsis thaliana OX=3702 GN=RPSAb PE=1 SV=1	0	9.161	8	2	4	2	1	332	37.3	9.63	11.7	2	0
High	None	Q8H173	40S ribosomal protein Sa-2 OS=Arabidopsis thaliana OX=3702 GN=RPSaB PE=1 SV=2	0	9.161	9	2	4	2	1	280	30.6	5.15	11.7	2	0
High	None	F4JTQ0	Vacuolar proton pump subunit B OS=Arabidopsis thaliana OX=3702 GN=VAB2 PE=1 SV=1	0	9.13	6	3	5	3	1	494	55.1	5.25	14.25	3	0
High	None	Q9SZN1	V-type proton ATPase subunit B2 OS=Arabidopsis thaliana OX=3702 GN=VHA-B2 PE=1 SV=1	0	9.13	7	3	5	3	1	487	54.3	5.15	14.25	3	0
High	Master Protein Candidate	Q9SIJ8	Adenine nucleotide alpha hydrolases-like superfamily protein OS=Arabidopsis thaliana OX=3702 GN=RD2 PE=1 SV=2	0	9.11	16	2	5	2	1	187	20.6	5.62	9	2	0
High	Master Protein	Q94II5	Adenine nucleotide alpha hydrolases-like superfamily protein OS=Arabidopsis thaliana OX=3702 GN=RD2 PE=1 SV=1	0	9.11	15	2	5	2	1	193	21.2	5.62	9	2	0
High	Master Protein	Q9FLQ4	Dihydrolipoyllysine-residue succinyltransferase component of 2-oxoglutarate dehydrogenase complex 1, mitochondrial OS=Arabidopsis thaliana OX=3702 GN=At5g55070 PE=1 SV=1	0	9.053	11	4	6	2	1	464	50.1	9.14	8.08	4	0
High	Master Protein	Q8VZ57	Alpha/beta-Hydrolases superfamily protein OS=Arabidopsis thaliana OX=3702 GN=At1g52510 PE=2 SV=1	0	9.036	10	2	3	2	1	380	41.8	7.05	12.6	2	0
High	Master Protein Candidate	F4ICZ4	Alpha/beta-Hydrolases superfamily protein OS=Arabidopsis thaliana OX=3702 GN=At1g52510 PE=4 SV=2	0	9.036	16	2	3	2	1	236	26.2	5.44	12.6	2	0
High	Master Protein	Q9S7M0	Chlorophyll a-b binding protein 3, chloroplastic OS=Arabidopsis thaliana OX=3702 GN=LHCB3 PE=1 SV=1	0	9.033	4	1	6	1	1	265	28.7	5.12	15.55	1	0
High	Master Protein Rejected	Q3E8E5	Putative myrosinase 3 OS=Arabidopsis thaliana OX=3702 GN=TGG3 PE=5 SV=1	0	8.992	5	2	4	0	0	439	50.7	7.93	10.28	2	0
High	None	O49506	Peroxisomal (S)-2-hydroxy-acid oxidase GLO5 OS=Arabidopsis thaliana OX=3702 GN=GLO5 PE=1 SV=1	0	8.983	8	3	6	1	1	368	40.5	8.31	16.41	3	0
High	Master Protein	O48646	Probable phospholipid hydroperoxide glutathione peroxidase 6, mitochondrial OS=Arabidopsis thaliana OX=3702 GN=GPX6 PE=2 SV=2	0	8.98	14	3	6	3	1	232	25.6	9.35	9.46	3	0
High	Master Protein	Q9LY66	50S ribosomal protein L1, chloroplastic OS=Arabidopsis thaliana OX=3702 GN=RPL1 PE=1 SV=1	0	8.948	16	3	4	3	1	346	37.6	9.26	10.01	3	0
High	Master Protein	Q42290	Probable mitochondrial-processing peptidase subunit beta, mitochondrial OS=Arabidopsis thaliana OX=3702 GN=At3g02090 PE=1 SV=2	0	8.936	5	2	4	2	1	531	59.1	6.79	16.1	2	0
High	Master Protein	P32962	Nitrilase 2 OS=Arabidopsis thaliana OX=3702 GN=NIT2 PE=1 SV=1	0	8.931	5	1	3	1	1	339	37.1	5.55	9.27	1	0
High	Master Protein	Q9SKT0	Protein THYLAKOID FORMATION 1, chloroplastic OS=Arabidopsis thaliana OX=3702 GN=THF1 PE=1 SV=1	0	8.916	11	3	5	3	1	300	33.8	9.13	15.81	3	0
High	None	F4IW47	Transketolase-2, chloroplastic OS=Arabidopsis thaliana OX=3702 GN=TKL-2 PE=1 SV=1	0	8.888	4	3	5	3	1	741	79.9	6.58	13.17	3	0
High	Master Protein Candidate	A0A1P8BGQ0	Ribosomal protein L18e/L15 superfamily protein OS=Arabidopsis thaliana OX=3702 GN=At5g27850 PE=4 SV=1	0	8.883	18	2	4	2	1	134	14.9	10.86	12.42	2	0
High	Master Protein Candidate	Q940B0	60S ribosomal protein L18-3 OS=Arabidopsis thaliana OX=3702 GN=RPL18C PE=2 SV=1	0	8.883	13	2	4	2	1	187	21	10.96	12.42	2	0
High	Master Protein	P42791	60S ribosomal protein L18-2 OS=Arabidopsis thaliana OX=3702 GN=RPL18B PE=1 SV=2	0	8.883	13	2	4	2	1	187	20.9	10.98	12.42	2	0
High	Master Protein Candidate	A0A1I9LT16	Ribosomal protein L18 OS=Arabidopsis thaliana OX=3702 GN=RPL18 PE=4 SV=1	0	8.883	18	2	4	2	1	134	14.8	10.86	12.42	2	0
High	Master Protein	Q93YR3	FAM10 family protein At4g22670 OS=Arabidopsis thaliana OX=3702 GN=At4g22670 PE=1 SV=1	0	8.862	8	2	3	2	1	441	46.6	4.93	10.11	2	0
High	Master Protein Candidate	F4J504	Superoxide dismutase OS=Arabidopsis thaliana OX=3702 GN=MSD1 PE=1 SV=1	0	8.841	7	2	4	2	1	230	25.3	8.48	14.74	2	0
High	Master Protein	O81235	Superoxide dismutase [Mn] 1, mitochondrial OS=Arabidopsis thaliana OX=3702 GN=MSD1 PE=1 SV=2	0	8.841	7	2	4	2	1	231	25.4	8.48	14.74	2	0
High	Master Protein	Q9SH69	6-phosphogluconate dehydrogenase, decarboxylating 1, chloroplastic OS=Arabidopsis thaliana OX=3702 GN=PGD1 PE=1 SV=1	0	8.497	6	2	3	2	1	487	53.3	5.45	10.1	2	0
High	Master Protein Candidate	Q9FWA3	6-phosphogluconate dehydrogenase, decarboxylating 2 OS=Arabidopsis thaliana OX=3702 GN=PGD2 PE=1 SV=1	0	8.497	6	2	3	2	1	486	53.5	7.42	10.1	2	0
High	None	F4K6P9	Glutamate dehydrogenase 2 OS=Arabidopsis thaliana OX=3702 GN=GDH2 PE=3 SV=1	0	8.486	11	3	3	3	1	309	33.2	6.8	5.22	3	0
High	None	F4IWP7	Breast basic conserved 1 OS=Arabidopsis thaliana OX=3702 GN=BBC1 PE=1 SV=1	0	8.456	21	2	3	2	1	153	17.7	10.55	8.35	2	0
High	Master Protein	O49299	Probable phosphoglucomutase, cytoplasmic 1 OS=Arabidopsis thaliana OX=3702 GN=At1g23190 PE=2 SV=2	0	8.401	5	2	3	2	1	583	63.1	6.3	10.24	2	0
High	None	Q8W585	ATP-dependent zinc metalloprotease FTSH 8, chloroplastic OS=Arabidopsis thaliana OX=3702 GN=FTSH8 PE=1 SV=1	0	8.39	5	3	5	3	1	685	73.2	5.95	7.7	3	0
High	Master Protein Candidate	A0A2H1ZE37	HARMLESS TO OZONE LAYER 1 OS=Arabidopsis thaliana OX=3702 GN=HOL1 PE=1 SV=1	0	8.389	7	2	5	2	1	217	24.1	4.58	0	2	0
High	Master Protein	Q0WP12	Thiocyanate methyltransferase 1 OS=Arabidopsis thaliana OX=3702 GN=HOL1 PE=1 SV=2	0	8.389	7	2	5	2	1	227	25.3	4.82	0	2	0
High	Master Protein	Q9ZU25	Probable mitochondrial-processing peptidase subunit alpha-1, mitochondrial OS=Arabidopsis thaliana OX=3702 GN=At1g51980 PE=1 SV=1	0	8.386	3	1	2	1	1	503	54.4	6.33	5.07	1	0
High	Master Protein Candidate	O04308	Probable mitochondrial-processing peptidase subunit alpha-2, chloroplastic/mitochondrial OS=Arabidopsis thaliana OX=3702 GN=MPPA2 PE=1 SV=1	0	8.386	3	1	2	1	1	499	54	6.48	5.07	1	0
High	Master Protein Candidate	A8MQE5	Insulinase (Peptidase family M16) protein OS=Arabidopsis thaliana OX=3702 GN=At1g51980 PE=3 SV=1	0	8.386	3	1	2	1	1	451	48.6	6	5.07	1	0
High	Master Protein Candidate	F4JEL4	Eukaryotic translation initiation factor 4A1 OS=Arabidopsis thaliana OX=3702 GN=EIF4A1 PE=1 SV=1	0	8.384	6	2	3	2	1	415	46.9	6.35	11.21	2	0
High	Master Protein Candidate	F4HV96	Eif4a-2 OS=Arabidopsis thaliana OX=3702 GN=EIF4A-2 PE=1 SV=1	0	8.384	6	2	3	2	1	407	46.2	5.68	11.21	2	0
High	Master Protein Candidate	A8MRZ7	Eukaryotic translation initiation factor 4A1 OS=Arabidopsis thaliana OX=3702 GN=EIF4A1 PE=3 SV=1	0	8.384	6	2	3	2	1	402	45.7	6.28	11.21	2	0
High	Master Protein Candidate	F4JEL5	Eukaryotic translation initiation factor 4A1 OS=Arabidopsis thaliana OX=3702 GN=EIF4A1 PE=1 SV=1	0	8.384	6	2	3	2	1	407	46.1	5.68	11.21	2	0
High	Master Protein Candidate	P41376	Eukaryotic initiation factor 4A-1 OS=Arabidopsis thaliana OX=3702 GN=EIF4A1 PE=1 SV=1	0	8.384	6	2	3	2	1	412	46.7	5.68	11.21	2	0
High	Master Protein Candidate	P41377	Eukaryotic initiation factor 4A-2 OS=Arabidopsis thaliana OX=3702 GN=TIF4A-2 PE=1 SV=1	0	8.384	6	2	3	2	1	412	46.7	5.68	11.21	2	0
High	Master Protein	A0A1I9LSZ7	Eukaryotic translation initiation factor 4A1 OS=Arabidopsis thaliana OX=3702 GN=EIF4A1 PE=1 SV=1	0	8.384	6	2	3	2	1	419	47.4	5.99	11.21	2	0
High	Master Protein Candidate	Q9CAI7	Eukaryotic initiation factor 4A-3 OS=Arabidopsis thaliana OX=3702 GN=TIF4A-3 PE=1 SV=1	0	8.384	6	2	3	2	1	414	46.7	5.33	11.21	2	0
High	Master Protein	Q9SEU8	Thioredoxin M2, chloroplastic OS=Arabidopsis thaliana OX=3702 GN=TRXM2 PE=1 SV=2	0	8.344	22	3	5	3	1	186	20.3	9.22	16.52	3	0
High	Master Protein Candidate	F4JG94	Thioredoxin superfamily protein OS=Arabidopsis thaliana OX=3702 GN=ATHM2 PE=4 SV=1	0	8.344	57	3	5	3	1	72	7.9	8.46	16.52	3	0
High	Master Protein	P21238	Chaperonin 60 subunit alpha 1, chloroplastic OS=Arabidopsis thaliana OX=3702 GN=CPN60A1 PE=1 SV=2	0	8.301	6	3	5	3	1	586	62	5.19	10.06	3	0
High	Master Protein	Q42406	Peptidyl-prolyl cis-trans isomerase CYP18-4 OS=Arabidopsis thaliana OX=3702 GN=CYP18-4 PE=1 SV=1	0	8.234	19	3	8	2	1	172	18.4	8.69	21.8	3	1
High	Master Protein	P52032	Phospholipid hydroperoxide glutathione peroxidase 1, chloroplastic OS=Arabidopsis thaliana OX=3702 GN=GPX1 PE=2 SV=2	0	8.225	18	2	3	2	1	236	26	9.38	10.88	2	0
High	None	F4J296	Ribosomal protein OS=Arabidopsis thaliana OX=3702 GN=EMB3126 PE=1 SV=1	0	8.214	13	2	3	2	1	291	31.6	9.63	10.01	2	0
High	None	P0CAN7	V-type proton ATPase subunit E3 OS=Arabidopsis thaliana OX=3702 GN=VHA-E3 PE=2 SV=1	0	8.195	11	2	3	2	1	237	27.1	6.19	10.26	2	0
High	None	A0A1P8ANX8	Vacuolar H+-ATPase subunit E isoform 3 OS=Arabidopsis thaliana OX=3702 GN=VHA-E3 PE=3 SV=1	0	8.195	11	2	3	2	1	237	27.2	6.02	10.26	2	0
High	None	A0A1P8ANV6	Vacuolar H+-ATPase subunit E isoform 3 OS=Arabidopsis thaliana OX=3702 GN=VHA-E3 PE=4 SV=1	0	8.195	14	2	3	2	1	192	22.4	5.66	10.26	2	0
High	Master Protein Candidate	A0A1P8ANK1	PATELLIN 2 OS=Arabidopsis thaliana OX=3702 GN=PATL2 PE=1 SV=1	0	8.187	5	3	5	1	1	649	72.3	4.97	10.62	3	0
High	Master Protein	Q56ZI2	Patellin-2 OS=Arabidopsis thaliana OX=3702 GN=PATL2 PE=1 SV=2	0	8.187	5	3	5	1	1	683	76	4.92	10.62	3	0
High	None	Q9XGZ0	NADP-dependent malic enzyme 3 OS=Arabidopsis thaliana OX=3702 GN=NADP-ME3 PE=1 SV=1	0	8.187	6	2	4	2	1	588	64.6	6.99	14.93	2	0
High	None	A0A1P8BDG6	Malic enzyme OS=Arabidopsis thaliana OX=3702 GN=NADP-ME3 PE=3 SV=1	0	8.187	6	2	4	2	1	560	61.3	6.48	14.93	2	0
High	None	A0A1P8BDF1	Malic enzyme OS=Arabidopsis thaliana OX=3702 GN=NADP-ME3 PE=3 SV=1	0	8.187	6	2	4	2	1	530	58.7	7.24	14.93	2	0
High	Master Protein	Q96251	ATP synthase subunit O, mitochondrial OS=Arabidopsis thaliana OX=3702 GN=At5g13450 PE=1 SV=2	0	8.168	15	3	5	3	1	238	26.3	9.23	14.37	3	0
High	Master Protein	P42699	Plastocyanin major isoform, chloroplastic OS=Arabidopsis thaliana OX=3702 GN=DRT112 PE=1 SV=2	0	8.162	14	1	2	1	1	167	17	5.2	11.54	1	0
High	Master Protein	F4J270	Probable glucan endo-1,3-beta-glucosidase BG3 OS=Arabidopsis thaliana OX=3702 GN=BG3 PE=2 SV=1	0	8.158	7	2	3	2	1	341	37.6	8.35	8.71	2	0
High	None	F4IGY6	Chlorophyll a-b binding protein, chloroplastic OS=Arabidopsis thaliana OX=3702 GN=LHCB4.3 PE=3 SV=1	0	8.157	9	2	6	1	1	185	20.2	6.8	16.57	2	0
High	Master Protein	Q9FZ47	ACT domain-containing protein ACR11 OS=Arabidopsis thaliana OX=3702 GN=ACR11 PE=1 SV=1	0	8.149	11	3	5	3	1	290	31.3	5.14	12.11	3	0
High	Master Protein Candidate	F4I613	Uridylyltransferase-like protein OS=Arabidopsis thaliana OX=3702 GN=ACR11 PE=4 SV=1	0	8.149	15	3	5	3	1	213	22.7	5.41	12.11	3	0
High	None	F4JE43	Chlorophyll a-b binding protein, chloroplastic OS=Arabidopsis thaliana OX=3702 GN=LHCA1 PE=3 SV=1	0	8.129	5	1	5	1	1	207	22.1	6.15	8.27	1	0
High	None	F4JE46	Chlorophyll a-b binding protein, chloroplastic OS=Arabidopsis thaliana OX=3702 GN=LHCA1 PE=3 SV=1	0	8.129	6	1	5	1	1	164	17.5	8.02	8.27	1	0
High	Master Protein	Q96242	Allene oxide synthase, chloroplastic OS=Arabidopsis thaliana OX=3702 GN=CYP74A PE=1 SV=3	0	8.123	6	2	4	2	1	518	58.2	8.66	14.15	2	0
High	Master Protein	O65660	PLAT domain-containing protein 1 OS=Arabidopsis thaliana OX=3702 GN=PLAT1 PE=1 SV=1	0	8.12	7	1	4	1	1	181	20.1	5.19	12.07	1	0
High	Master Protein	Q9SJ12	Probable ATP synthase 24 kDa subunit, mitochondrial OS=Arabidopsis thaliana OX=3702 GN=At2g21870 PE=1 SV=1	0	8.083	18	3	5	3	1	240	27.6	6.67	13.53	3	0
High	None	Q96528	Catalase-1 OS=Arabidopsis thaliana OX=3702 GN=CAT1 PE=1 SV=3	0	8.076	6	2	6	1	1	492	56.7	7.42	19.09	2	0
High	Master Protein	Q9SRZ6	Cytosolic isocitrate dehydrogenase [NADP] OS=Arabidopsis thaliana OX=3702 GN=CICDH PE=1 SV=1	0	8.007	7	2	4	2	1	410	45.7	6.57	13.22	2	0
High	Master Protein	Q9LQU2	Protein PLANT CADMIUM RESISTANCE 1 OS=Arabidopsis thaliana OX=3702 GN=PCR1 PE=1 SV=1	0	7.98	13	1	2	1	1	151	16.5	7.62	7.35	1	0
High	Master Protein	P49200	40S ribosomal protein S20-1 OS=Arabidopsis thaliana OX=3702 GN=RPS20A PE=2 SV=2	0	7.955	19	2	4	2	1	124	13.9	9.72	11.18	2	0
High	Master Protein	Q94EG6	Uncharacterized protein At5g02240 OS=Arabidopsis thaliana OX=3702 GN=At5g02240 PE=1 SV=1	0	7.907	14	2	4	2	1	253	27.1	6.62	9.82	2	0
High	None	A0A1I9LMY0	Beta glucosidase 43 OS=Arabidopsis thaliana OX=3702 GN=BGLU43 PE=3 SV=1	0	7.887	9	3	3	3	1	384	43.5	6.8	6.46	3	0
High	Master Protein	Q9MAP3	50S ribosomal protein L11, chloroplastic OS=Arabidopsis thaliana OX=3702 GN=RPL11 PE=2 SV=1	0	7.877	16	3	5	3	1	222	23.1	9.66	13.56	3	0
High	None	A0A1I9LMX8	Beta glucosidase 43 OS=Arabidopsis thaliana OX=3702 GN=BGLU43 PE=3 SV=1	0	7.796	8	2	3	2	1	312	35.9	7.11	9.89	2	0
High	None	Q9ZVA5	EP1-like glycoprotein 4 OS=Arabidopsis thaliana OX=3702 GN=At1g78860 PE=3 SV=1	0	7.786	7	2	3	2	1	443	49.2	6.28	9.3	2	0
High	Master Protein	P56767	Photosystem I P700 chlorophyll a apoprotein A2 OS=Arabidopsis thaliana OX=3702 GN=psaB PE=3 SV=1	0	7.776	3	3	6	3	1	734	82.4	7.4	12.36	3	0
High	Master Protein Candidate	F4JTV4	Adenosylhomocysteinase OS=Arabidopsis thaliana OX=3702 GN=HOG1 PE=3 SV=1	0	7.758	5	2	3	2	1	440	48.4	6.84	9.77	2	0
High	Master Protein	O23255	Adenosylhomocysteinase 1 OS=Arabidopsis thaliana OX=3702 GN=SAHH1 PE=1 SV=1	0	7.758	5	2	3	2	1	485	53.3	5.97	9.77	2	0
High	Master Protein Candidate	F4JTV5	S-adenosyl-L-homocysteine hydrolase OS=Arabidopsis thaliana OX=3702 GN=HOG1 PE=4 SV=1	0	7.758	6	2	3	2	1	364	40	6.46	9.77	2	0
High	Master Protein	Q8LD46	60S ribosomal protein L23a-1 OS=Arabidopsis thaliana OX=3702 GN=RPL23AA PE=2 SV=2	0	7.748	15	2	5	2	1	154	17.4	10.2	15.6	2	0
High	Master Protein Candidate	A8MS83	Ribosomal protein L23AB OS=Arabidopsis thaliana OX=3702 GN=RPL23AB PE=3 SV=1	0	7.748	16	2	5	2	1	148	16.7	10.17	15.6	2	0
High	Master Protein Candidate	Q9M3C3	60S ribosomal protein L23a-2 OS=Arabidopsis thaliana OX=3702 GN=RPL23AB PE=2 SV=1	0	7.748	15	2	5	2	1	154	17.4	10.23	15.6	2	0
High	Master Protein	Q9SUU5	Cytochrome b-c1 complex subunit 7-1 OS=Arabidopsis thaliana OX=3702 GN=QCR7-1 PE=1 SV=1	0	7.745	28	3	6	3	1	122	14.5	9.73	10.83	3	0
High	None	F4KHY7	General regulatory factor 8 OS=Arabidopsis thaliana OX=3702 GN=GRF8 PE=3 SV=1	0	7.742	14	3	6	1	1	260	29.5	5.39	15.63	3	0
High	None	P48348	14-3-3-like protein GF14 kappa OS=Arabidopsis thaliana OX=3702 GN=GRF8 PE=1 SV=2	0	7.742	15	3	6	1	1	248	28	4.89	15.63	3	0
High	Master Protein	Q9FFS8	40S ribosomal protein S10-2 OS=Arabidopsis thaliana OX=3702 GN=RPS10B PE=2 SV=1	0	7.735	15	2	3	2	1	180	19.7	9.73	11.57	2	0
High	Master Protein Candidate	A8MRV0	RNA binding Plectin/S10 domain-containing protein OS=Arabidopsis thaliana OX=3702 GN=RPS10B PE=4 SV=1	0	7.735	20	2	3	2	1	134	14.3	9.74	11.57	2	0
High	Master Protein	Q9SRH5	Mitochondrial outer membrane protein porin 1 OS=Arabidopsis thaliana OX=3702 GN=VDAC1 PE=1 SV=3	0	7.697	7	1	2	1	1	276	29.4	8.73	7.56	1	0
High	None	A0A1I9LRF4	Peroxiredoxin IIF OS=Arabidopsis thaliana OX=3702 GN=PRXIIF PE=1 SV=1	0	7.652	16	2	3	2	1	184	20	9.36	8.77	2	0
High	None	Q9SLF7	60S acidic ribosomal protein P2-2 OS=Arabidopsis thaliana OX=3702 GN=RPP2B PE=1 SV=1	0	7.634	10	1	4	1	1	115	11.4	4.68	13.36	1	0
High	None	F4IGR3	60S acidic ribosomal protein family OS=Arabidopsis thaliana OX=3702 GN=At2g27710 PE=3 SV=1	0	7.634	12	1	4	1	1	98	10.2	4.68	13.36	1	0
High	Master Protein	P25864	50S ribosomal protein L9, chloroplastic OS=Arabidopsis thaliana OX=3702 GN=RPL9 PE=2 SV=1	0	7.63	14	2	3	2	1	197	22.1	9.67	8.25	2	0
High	Master Protein	Q9XGM1	V-type proton ATPase subunit D OS=Arabidopsis thaliana OX=3702 GN=VHA-D PE=1 SV=2	0	7.613	5	2	4	2	1	261	29	9.51	12.58	2	0
High	Master Protein Candidate	Q9SUI4	Photosystem I reaction center subunit XI, chloroplastic OS=Arabidopsis thaliana OX=3702 GN=PSAL PE=1 SV=2	0	7.605	14	2	4	2	1	219	23	9.85	14.58	2	0
High	Master Protein	A0A1P8B6D0	Photosystem I subunit l OS=Arabidopsis thaliana OX=3702 GN=PSAL PE=4 SV=1	0	7.605	11	2	4	2	1	281	30.4	10.14	14.58	2	0
High	Master Protein	Q8LDQ8	At5g24165 OS=Arabidopsis thaliana OX=3702 GN=At5g24165 PE=2 SV=1	0	7.574	25	2	3	2	1	75	7.8	10.37	3.66	2	0
High	Master Protein	Q9LYJ3	ADP-ribosylation factor A1B OS=Arabidopsis thaliana OX=3702 GN=ADP-ribosylation factor A1B PE=3 SV=1	0	7.551	19	3	5	3	1	188	21.5	6.95	10.77	3	0
High	Master Protein Candidate	P36397	ADP-ribosylation factor 1 OS=Arabidopsis thaliana OX=3702 GN=ARF1 PE=1 SV=2	0	7.551	20	3	5	3	1	181	20.6	6.95	10.77	3	0
High	Master Protein Candidate	Q9LQC8	ADP-ribosylation factor 2-A OS=Arabidopsis thaliana OX=3702 GN=ARF2-A PE=2 SV=2	0	7.551	20	3	5	3	1	181	20.6	6.95	10.77	3	0
High	Master Protein Candidate	A0A1P8BDK6	ADP-ribosylation factor A1B OS=Arabidopsis thaliana OX=3702 GN=ARFA1B PE=3 SV=1	0	7.551	20	3	5	3	1	181	20.7	6.95	10.77	3	0
High	Master Protein Candidate	Q6ID97	ADP-ribosylation factor A1F OS=Arabidopsis thaliana OX=3702 GN=ARFA1F PE=2 SV=1	0	7.551	20	3	5	3	1	181	20.6	6.95	10.77	3	0
High	Master Protein Candidate	Q9M1P5	ADP-ribosylation factor A1E OS=Arabidopsis thaliana OX=3702 GN=T17J13.250 PE=2 SV=1	0	7.551	20	3	5	3	1	181	20.6	6.95	10.77	3	0
High	None	Q9S6Z7	Bifunctional L-3-cyanoalanine synthase/cysteine synthase D1 OS=Arabidopsis thaliana OX=3702 GN=CYSD1 PE=1 SV=1	0	7.539	6	1	1	1	1	324	34.3	5.34	4.18	1	0
High	None	F4K5T1	Cysteine synthase D2 OS=Arabidopsis thaliana OX=3702 GN=CYSD2 PE=4 SV=1	0	7.539	8	1	1	1	1	237	25.1	6.35	4.18	1	0
High	None	Q9SXS7	Bifunctional L-3-cyanoalanine synthase/cysteine synthase D2 OS=Arabidopsis thaliana OX=3702 GN=CYSD2 PE=1 SV=1	0	7.539	6	1	1	1	1	323	34.3	5.59	4.18	1	0
High	Master Protein	Q8LCA1	Protein CURVATURE THYLAKOID 1B, chloroplastic OS=Arabidopsis thaliana OX=3702 GN=CURT1B PE=1 SV=2	0	7.508	14	1	1	1	1	174	18.5	7.94	4.02	1	0
High	Master Protein	Q9FE58	60S ribosomal protein L22-3 OS=Arabidopsis thaliana OX=3702 GN=RPL22C PE=2 SV=1	0	7.465	19	3	4	1	1	124	14	9.55	9.09	3	2
High	None	A0A1I9LMX9	Beta glucosidase 43 OS=Arabidopsis thaliana OX=3702 GN=BGLU43 PE=3 SV=1	0	7.429	8	2	2	2	1	345	39.1	7.01	6.46	2	0
High	Master Protein Candidate	F4IL52	Thioredoxin family protein OS=Arabidopsis thaliana OX=3702 GN=UNE5 PE=3 SV=1	0	7.421	7	2	4	2	1	323	35.6	6	12.64	2	0
High	Master Protein Candidate	A8MSC5	AT2G47470 protein OS=Arabidopsis thaliana OX=3702 GN=UNE5 PE=2 SV=1	0	7.421	7	2	4	2	1	335	36.5	5.67	12.64	2	0
High	Master Protein	O22263	Protein disulfide-isomerase like 2-1 OS=Arabidopsis thaliana OX=3702 GN=PDIL2-1 PE=2 SV=1	0	7.421	6	2	4	2	1	361	39.5	6.06	12.64	2	0
High	Master Protein	Q9SUR3	Reticulon-like protein B1 OS=Arabidopsis thaliana OX=3702 GN=RTNLB1 PE=1 SV=1	0	7.41	9	2	3	2	1	275	30.5	8.29	8.2	2	0
High	None	Q9FJA6	40S ribosomal protein S3-3 OS=Arabidopsis thaliana OX=3702 GN=RPS3C PE=1 SV=1	0	7.385	11	2	4	2	1	248	27.4	9.54	8.94	2	0
High	None	F4III4	MALE GAMETOPHYTE DEFECTIVE 1 OS=Arabidopsis thaliana OX=3702 GN=MGP1 PE=4 SV=1	0	7.27	13	2	4	2	1	220	25.1	9.01	11.44	2	0
High	Master Protein	P56780	Photosystem II reaction center protein H OS=Arabidopsis thaliana OX=3702 GN=psbH PE=1 SV=2	0	7.264	15	1	4	1	1	73	7.7	6.55	10.72	1	0
High	Master Protein	Q9SDS7	V-type proton ATPase subunit C OS=Arabidopsis thaliana OX=3702 GN=VHA-C PE=1 SV=1	0	7.264	7	2	3	2	1	375	42.6	5.54	9.62	2	0
High	Master Protein	Q9SVD1	At3g52500 OS=Arabidopsis thaliana OX=3702 GN=F22O6_120 PE=2 SV=1	0	7.242	7	3	6	3	1	469	51	8.21	15.35	3	0
High	None	Q9M263	Germin-like protein subfamily 2 member 4 OS=Arabidopsis thaliana OX=3702 GN=GLP10 PE=2 SV=1	0	7.233	7	1	3	1	1	220	23.5	8.79	3.28	1	0
High	None	Q9FZ27	Germin-like protein subfamily 2 member 2 OS=Arabidopsis thaliana OX=3702 GN=At1g02335 PE=2 SV=1	0	7.233	7	1	3	1	1	219	23.4	8.56	3.28	1	0
High	None	Q3EAG0	Germin-like protein OS=Arabidopsis thaliana OX=3702 GN=GLP10 PE=3 SV=1	0	7.233	8	1	3	1	1	191	20.3	9.42	3.28	1	0
High	Master Protein Candidate	F4J447	Alpha/beta-Hydrolases superfamily protein OS=Arabidopsis thaliana OX=3702 GN=At3g23600 PE=4 SV=1	0	7.214	13	2	3	2	1	236	25.5	5.2	9.87	2	0
High	Master Protein	Q9LUG8	AT3g23600/MDB19_9 OS=Arabidopsis thaliana OX=3702 GN=At3g23600 PE=2 SV=1	0	7.214	13	2	3	2	1	239	25.8	5.31	9.87	2	0
High	Master Protein	Q9MAK9	26S proteasome regulatory subunit S10B homolog B OS=Arabidopsis thaliana OX=3702 GN=RPT4B PE=1 SV=1	0	7.211	7	2	4	1	1	399	44.7	8.19	11.06	2	0
High	Master Protein Candidate	B3H533	AAA-type ATPase family protein OS=Arabidopsis thaliana OX=3702 GN=At1g45000 PE=4 SV=1	0	7.211	8	2	4	1	1	335	37.5	8.21	11.06	2	0
High	Master Protein Candidate	Q9SEI3	26S proteasome regulatory subunit 10B homolog A OS=Arabidopsis thaliana OX=3702 GN=RPT4A PE=1 SV=1	0	7.211	7	2	4	1	1	399	44.8	8.19	11.06	2	0
High	Master Protein	F4HSX1	Adenine phosphoribosyl transferase 1 OS=Arabidopsis thaliana OX=3702 GN=APT1 PE=1 SV=1	0	7.205	12	2	3	2	1	284	31	7.96	8.68	2	0
High	Master Protein Candidate	P31166	Adenine phosphoribosyltransferase 1, chloroplastic OS=Arabidopsis thaliana OX=3702 GN=APT1 PE=1 SV=2	0	7.205	14	2	3	2	1	243	26.4	8.44	8.68	2	0
High	Master Protein	Q9FEC1	Light-harvesting complex-like protein OHP2, chloroplastic OS=Arabidopsis thaliana OX=3702 GN=OHP2 PE=1 SV=1	0	7.203	20	2	3	2	1	172	18.7	9.35	7.87	2	0
High	Master Protein	Q9LZ06	Glutathione S-transferase L3 OS=Arabidopsis thaliana OX=3702 GN=GSTL3 PE=2 SV=1	0	7.17	15	3	3	3	1	235	27.1	5.2	7.69	3	0
High	Master Protein	Q9SEU6	Thioredoxin M4, chloroplastic OS=Arabidopsis thaliana OX=3702 GN=At3g15360 PE=2 SV=2	0	7.14	15	3	6	3	1	193	21.2	9.57	9.03	3	0
High	Master Protein	Q8H107	Dihydrolipoyllysine-residue succinyltransferase component of 2-oxoglutarate dehydrogenase complex 2, mitochondrial OS=Arabidopsis thaliana OX=3702 GN=At4g26910 PE=1 SV=2	0	7.102	8	4	5	2	1	464	50	9.09	7.03	4	2
High	None	O49447	ADP,ATP carrier protein 3, mitochondrial OS=Arabidopsis thaliana OX=3702 GN=AAC3 PE=1 SV=1	0	7.079	6	2	4	2	1	379	40.7	9.77	12.4	2	0
High	Master Protein	Q9CA67	Geranylgeranyl diphosphate reductase, chloroplastic OS=Arabidopsis thaliana OX=3702 GN=CHLP PE=1 SV=1	0	7.074	9	2	2	2	1	467	51.8	8.91	6.99	2	0
High	Master Protein	Q9SMX3	Mitochondrial outer membrane protein porin 3 OS=Arabidopsis thaliana OX=3702 GN=VDAC3 PE=1 SV=3	0	7.033	9	2	3	2	1	274	29.2	8.21	10.17	2	0
High	Master Protein	Q9FNC4	HAD superfamily, subfamily IIIB acid phosphatase OS=Arabidopsis thaliana OX=3702 GN=MRH10.13 PE=2 SV=1	0	7.015	11	3	6	2	1	272	31	7.91	14.33	3	1
High	None	Q9LZX4	Fasciclin-like arabinogalactan protein 10 OS=Arabidopsis thaliana OX=3702 GN=FLA10 PE=2 SV=1	0	6.963	6	2	3	2	1	422	43.6	5.82	10.41	2	0
High	Master Protein Candidate	P38666	60S ribosomal protein L24-2 OS=Arabidopsis thaliana OX=3702 GN=RPL24B PE=1 SV=2	0	6.875	15	2	4	2	1	163	18.6	10.78	14.55	2	0
High	Master Protein	Q42347	60S ribosomal protein L24-1 OS=Arabidopsis thaliana OX=3702 GN=RPL24A PE=1 SV=2	0	6.875	15	2	4	2	1	164	18.8	10.7	14.55	2	0
High	Master Protein	P29402	Calnexin homolog 1 OS=Arabidopsis thaliana OX=3702 GN=CNX1 PE=1 SV=1	0	6.764	7	3	4	3	1	530	60.4	4.91	9.68	3	0
High	None	Q8H1B3	Probable mediator of RNA polymerase II transcription subunit 37b OS=Arabidopsis thaliana OX=3702 GN=MED37B PE=1 SV=1	0	6.759	3	1	2	1	1	675	75.1	5.05	8.99	1	0
High	Master Protein	P49692	60S ribosomal protein L7a-1 OS=Arabidopsis thaliana OX=3702 GN=RPL7AA PE=2 SV=2	0	6.643	15	3	7	3	1	257	29.1	10.13	10.71	3	0
High	Master Protein Candidate	Q3EDH2	Ribosomal protein L4 OS=Arabidopsis thaliana OX=3702 GN=RPL4 PE=3 SV=1	0	6.616	8	2	4	2	1	280	30.4	8.94	11.25	2	0
High	Master Protein	O50061	50S ribosomal protein L4, chloroplastic OS=Arabidopsis thaliana OX=3702 GN=RPL4 PE=2 SV=2	0	6.616	7	2	4	2	1	282	30.5	8.94	11.25	2	0
High	Master Protein Candidate	Q2V4Q4	AT1G07320 protein OS=Arabidopsis thaliana OX=3702 GN=RPL4 PE=2 SV=1	0	6.616	8	2	4	2	1	278	30.1	9.26	11.25	2	0
High	Master Protein	Q94BT2	Auxin-induced in root cultures protein 12 OS=Arabidopsis thaliana OX=3702 GN=AIR12 PE=1 SV=3	0	6.559	11	3	6	3	1	252	25.6	7.9	11.97	3	0
High	Master Protein	Q9SD79	Wiskott-aldrich syndrome family protein, putative (DUF1118) OS=Arabidopsis thaliana OX=3702 GN=F13G24.250 PE=1 SV=1	0	6.559	12	2	4	2	1	158	16.6	9.28	12.41	2	0
High	None	Q9LN39	F18O14.31 OS=Arabidopsis thaliana OX=3702 GN=At1g19550 PE=4 SV=1	0	6.552	14	2	4	2	1	153	17.1	5.95	13.26	2	0
High	Master Protein	F4K0D0	Flavodoxin-like quinone reductase 1 OS=Arabidopsis thaliana OX=3702 GN=FQR1 PE=4 SV=1	0	6.54	10	1	2	1	1	244	26.9	7.56	6.76	1	0
High	Master Protein Candidate	Q9LSQ5	NAD(P)H dehydrogenase (quinone) FQR1 OS=Arabidopsis thaliana OX=3702 GN=FQR1 PE=1 SV=1	0	6.54	12	1	2	1	1	204	21.8	6.38	6.76	1	0
High	None	F4JB05	Ribosomal protein S5/Elongation factor G/III/V family protein OS=Arabidopsis thaliana OX=3702 GN=MGH6.2 PE=4 SV=1	0	6.533	4	3	4	3	1	820	90.9	6.1	3.57	3	0
High	None	F4JNE0	Nucleotide-sugar transporter family protein OS=Arabidopsis thaliana OX=3702 GN=NRPD4 PE=4 SV=1	0	6.533	4	3	4	3	1	844	93.3	6.19	3.57	3	0
High	Master Protein	Q42449	Profilin-1 OS=Arabidopsis thaliana OX=3702 GN=PRO1 PE=1 SV=1	0	6.533	15	1	2	1	1	131	14.3	4.82	7.02	1	0
High	Master Protein	Q96255	Phosphoserine aminotransferase 1, chloroplastic OS=Arabidopsis thaliana OX=3702 GN=PSAT1 PE=1 SV=1	0	6.532	4	1	2	1	1	430	47.3	8.06	8.64	1	0
High	None	Q9LHP1	60S ribosomal protein L7-4 OS=Arabidopsis thaliana OX=3702 GN=RPL7D PE=2 SV=1	0	6.519	10	3	5	0	2	244	28.4	9.95	10.02	3	0
High	Master Protein Candidate	O82660	Photosystem II stability/assembly factor HCF136, chloroplastic OS=Arabidopsis thaliana OX=3702 GN=HCF136 PE=1 SV=1	0	6.484	5	2	3	2	1	403	44.1	7.34	8.96	2	0
High	Master Protein	A0A1P8BG37	Photosystem II stability/assembly factor, chloroplast (HCF136) OS=Arabidopsis thaliana OX=3702 GN=HCF136 PE=4 SV=1	0	6.484	5	2	3	2	1	426	46.9	8.03	8.96	2	0
High	None	Q9SUT9	Reticulon-like protein B2 OS=Arabidopsis thaliana OX=3702 GN=RTNLB2 PE=1 SV=1	0	6.456	7	1	1	1	1	271	30.3	8.54	4.59	1	0
High	Master Protein	Q38882	Phospholipase D alpha 1 OS=Arabidopsis thaliana OX=3702 GN=PLDALPHA1 PE=1 SV=2	0	6.444	2	1	3	1	1	810	91.8	5.87	4.58	1	0
High	Master Protein	A0A1P8AV66	Translation elongation factor EF1B/ribosomal protein S6 family protein OS=Arabidopsis thaliana OX=3702 GN=At1g64510 PE=3 SV=1	0	6.357	12	2	2	2	1	231	25.4	6.55	0	2	0
High	Master Protein Candidate	Q8VY91	30S ribosomal protein S6 alpha, chloroplastic OS=Arabidopsis thaliana OX=3702 GN=RPS6 PE=2 SV=1	0	6.357	13	2	2	2	1	207	22.7	6.2	0	2	0
High	Master Protein	Q9SU83	Alkaline-phosphatase-like family protein OS=Arabidopsis thaliana OX=3702 GN=At4g29680 PE=2 SV=1	0	6.352	4	2	3	2	1	496	54.6	5.88	7.24	2	0
High	Master Protein	P49690	60S ribosomal protein L23 OS=Arabidopsis thaliana OX=3702 GN=RPL23A PE=2 SV=3	0	6.349	24	3	4	3	1	140	15	10.48	7.06	3	0
High	Master Protein Candidate	F4J3P1	Ribosomal protein L14p/L23e family protein OS=Arabidopsis thaliana OX=3702 GN=emb2171 PE=3 SV=1	0	6.349	27	3	4	3	1	125	13.4	10.05	7.06	3	0
High	Master Protein	Q9LFR3	Gibberellin-regulated protein 14 OS=Arabidopsis thaliana OX=3702 GN=GASA14 PE=1 SV=1	0	6.346	4	2	3	2	1	275	29.1	9.94	7.62	2	0
High	Master Protein Candidate	F4IVR2	Heat shock protein 60-2 OS=Arabidopsis thaliana OX=3702 GN=HSP60-2 PE=1 SV=1	0	6.272	6	2	3	2	1	580	61.4	6.33	10.91	2	0
High	Master Protein	Q8L7B5	Chaperonin CPN60-like 1, mitochondrial OS=Arabidopsis thaliana OX=3702 GN=At2g33210 PE=1 SV=1	0	6.272	6	2	3	2	1	585	61.9	6.68	10.91	2	0
High	None	F4IMI7	Ribosomal protein S4 (RPS4A) family protein OS=Arabidopsis thaliana OX=3702 GN=At2g17360 PE=4 SV=1	0	6.257	18	3	4	3	1	184	21.4	9.96	7.61	3	0
High	Master Protein	Q9LVJ1	Subtilisin-like protease SBT1.4 OS=Arabidopsis thaliana OX=3702 GN=SBT1.4 PE=2 SV=1	0	6.202	4	2	2	2	1	777	81.8	6.77	3.06	2	0
High	Master Protein	Q42472	Glutamate decarboxylase 2 OS=Arabidopsis thaliana OX=3702 GN=GAD2 PE=1 SV=1	0	6.192	8	3	4	3	1	494	56.1	5.4	9.13	3	0
High	None	Q8LCE1	Glutamine synthetase cytosolic isozyme 1-2 OS=Arabidopsis thaliana OX=3702 GN=GLN1-2 PE=1 SV=2	0	6.184	4	1	3	1	1	356	39.2	5.27	9.84	1	0
High	None	F4ID91	Glutamine synthetase OS=Arabidopsis thaliana OX=3702 GN=GSR2 PE=1 SV=1	0	6.184	4	1	3	1	1	365	40.4	5.29	9.84	1	0
High	Master Protein Candidate	Q9FMT1	3-isopropylmalate dehydrogenase 1, chloroplastic OS=Arabidopsis thaliana OX=3702 GN=IMDH1 PE=1 SV=1	0	6.122	4	1	2	1	1	409	44.1	6.01	6.4	1	0
High	Master Protein Candidate	Q9SA14	3-isopropylmalate dehydrogenase 3, chloroplastic OS=Arabidopsis thaliana OX=3702 GN=IMDH3 PE=1 SV=2	0	6.122	4	1	2	1	1	404	43.8	5.82	6.4	1	0
High	Master Protein Candidate	P93832	3-isopropylmalate dehydrogenase 2, chloroplastic OS=Arabidopsis thaliana OX=3702 GN=IMDH2 PE=1 SV=1	0	6.122	4	1	2	1	1	405	43.3	6.06	6.4	1	0
High	Master Protein Candidate	B9DHH9	3-isopropylmalate dehydrogenase OS=Arabidopsis thaliana OX=3702 GN=IMD1 PE=1 SV=1	0	6.122	4	1	2	1	1	388	41.9	6	6.4	1	0
High	Master Protein	A0A1P8AUM8	3-isopropylmalate dehydrogenase OS=Arabidopsis thaliana OX=3702 GN=IMD3 PE=3 SV=1	0	6.122	4	1	2	1	1	419	45.7	6.46	6.4	1	0
High	Master Protein Candidate	F4I472	Cytosolic ribosomal protein S15 OS=Arabidopsis thaliana OX=3702 GN=RPS15 PE=3 SV=1	0	6.111	11	1	3	1	1	151	17	10.35	8.97	1	0
High	Master Protein Candidate	Q9FY64	40S ribosomal protein S15-4 OS=Arabidopsis thaliana OX=3702 GN=RPS15D PE=2 SV=1	0	6.111	11	1	3	1	1	152	17.1	10.35	8.97	1	0
High	Master Protein Candidate	Q9FY65	40S ribosomal protein S15-3 OS=Arabidopsis thaliana OX=3702 GN=RPS15C PE=2 SV=1	0	6.111	11	1	3	1	1	150	16.7	10.52	8.97	1	0
High	Master Protein	Q08112	40S ribosomal protein S15-1 OS=Arabidopsis thaliana OX=3702 GN=RPS15A PE=2 SV=1	0	6.111	11	1	3	1	1	152	17.1	10.35	8.97	1	0
High	Master Protein	Q94B60	ATP-dependent Clp protease proteolytic subunit 4, chloroplastic OS=Arabidopsis thaliana OX=3702 GN=CLPP4 PE=1 SV=1	0	6.103	8	2	4	2	1	292	31.5	5.55	7.91	2	0
High	Master Protein	Q94AD1	Putative DNA-binding protein At1g48610 OS=Arabidopsis thaliana OX=3702 GN=At1g48610 PE=1 SV=1	0	6.083	13	1	2	1	1	212	21.7	11.41	7.49	1	0
High	Master Protein Candidate	Q3ECU3	AT hook motif-containing protein OS=Arabidopsis thaliana OX=3702 GN=At1g48610 PE=1 SV=1	0	6.083	14	1	2	1	1	198	20.2	11.6	7.49	1	0
High	Master Protein	P43297	Cysteine proteinase RD21A OS=Arabidopsis thaliana OX=3702 GN=RD21A PE=1 SV=1	0	6.059	8	2	3	2	1	462	50.9	5.41	4.28	2	0
High	Master Protein	Q9SF40	60S ribosomal protein L4-1 OS=Arabidopsis thaliana OX=3702 GN=RPL4A PE=1 SV=1	0	6.026	10	3	4	3	1	406	44.7	10.35	0	3	0
High	Master Protein	Q9FKK1	Protein transport protein Sec61 subunit beta OS=Arabidopsis thaliana OX=3702 GN=MUF9.9 PE=2 SV=1	0	6.016	22	1	1	1	1	109	10.9	11.56	4.76	1	0
High	Master Protein Candidate	B3H5Y8	Glycine cleavage system P protein OS=Arabidopsis thaliana OX=3702 GN=GLDP1 PE=3 SV=1	0	6.008	2	1	2	1	1	976	106.2	6.99	8.03	1	0
High	Master Protein	Q94B78	Glycine dehydrogenase (decarboxylating) 1, mitochondrial OS=Arabidopsis thaliana OX=3702 GN=GLDP1 PE=1 SV=2	0	6.008	2	1	2	1	1	1037	112.9	6.98	8.03	1	0
High	Master Protein	Q9SYW8	Photosystem I chlorophyll a/b-binding protein 2, chloroplastic OS=Arabidopsis thaliana OX=3702 GN=LHCA2 PE=1 SV=1	0	6.004	8	1	2	1	1	257	27.7	7.44	10.02	1	0
High	Master Protein	Q9SRG3	Protein disulfide isomerase-like 1-2 OS=Arabidopsis thaliana OX=3702 GN=PDIL1-2 PE=2 SV=1	0	5.996	6	2	3	1	1	508	56.3	5	7.26	2	0
High	Master Protein	Q8L8T2	Glutaredoxin-C1 OS=Arabidopsis thaliana OX=3702 GN=GRXC1 PE=2 SV=2	0	5.966	14	1	2	1	1	125	13.6	5.48	6.27	1	0
High	Master Protein Candidate	A0A1P8AT46	GATA type zinc finger transcription factor family protein OS=Arabidopsis thaliana OX=3702 GN=WLIM1 PE=4 SV=1	0	5.929	11	1	3	1	1	148	16.3	8.68	2.49	1	0
High	Master Protein	Q94JX5	LIM domain-containing protein WLIM1 OS=Arabidopsis thaliana OX=3702 GN=WLIM1 PE=1 SV=1	0	5.929	9	1	3	1	1	190	21	8.84	2.49	1	0
High	Master Protein	Q8W4S4	V-type proton ATPase subunit a3 OS=Arabidopsis thaliana OX=3702 GN=VHA-a3 PE=1 SV=1	0	5.9	2	1	1	1	1	821	92.8	5.94	4.82	1	0
High	None	B9DGP8	AT5G13450 protein OS=Arabidopsis thaliana OX=3702 GN=ATP5 PE=1 SV=1	0	5.893	13	2	3	2	1	190	21.1	9.7	9.56	2	0
High	Master Protein Candidate	P59226	Histone H3.2 OS=Arabidopsis thaliana OX=3702 GN=HTR2 PE=1 SV=2	0	5.893	7	1	4	1	1	136	15.3	11.3	9.08	1	0
High	Master Protein Candidate	Q9FX60	Histone H3-like 1 OS=Arabidopsis thaliana OX=3702 GN=At1g13370 PE=2 SV=3	0	5.893	7	1	4	1	1	136	15.3	11.17	9.08	1	0
High	Master Protein Candidate	Q9FXI7	Histone H3-like 2 OS=Arabidopsis thaliana OX=3702 GN=MGH3 PE=2 SV=3	0	5.893	7	1	4	1	1	137	15.7	11.44	9.08	1	0
High	Master Protein	Q9FKQ3	Histone H3-like 5 OS=Arabidopsis thaliana OX=3702 GN=At5g65350 PE=2 SV=3	0	5.893	6	1	4	1	1	139	15.6	11.25	9.08	1	0
High	Master Protein	Q9LXG1	40S ribosomal protein S9-1 OS=Arabidopsis thaliana OX=3702 GN=RPS9B PE=1 SV=1	0	5.89	14	3	5	3	1	198	23	10.17	12.13	3	0
High	Master Protein	P46645	Aspartate aminotransferase, cytoplasmic isozyme 1 OS=Arabidopsis thaliana OX=3702 GN=ASP2 PE=1 SV=2	0	5.865	3	1	1	1	1	405	44.2	7.28	3.54	1	0
High	Master Protein Candidate	F4JIM7	Dolichyl-diphosphooligosaccharide--protein glycosyltransferase subunit 2 OS=Arabidopsis thaliana OX=3702 GN=HAP6 PE=1 SV=2	0	5.862	2	1	1	1	1	679	73.4	7.09	4.66	1	0
High	Master Protein	Q93Z16	Dolichyl-diphosphooligosaccharide--protein glycosyltransferase subunit 2 OS=Arabidopsis thaliana OX=3702 GN=RPN2 PE=1 SV=1	0	5.862	2	1	1	1	1	691	74.6	7.53	4.66	1	0
High	None	F4J912	Ribosomal protein L5 OS=Arabidopsis thaliana OX=3702 GN=ATL5 PE=1 SV=1	0	5.857	13	2	4	2	1	190	21.5	5.86	5.78	2	0
High	Master Protein	P51419	60S ribosomal protein L27-3 OS=Arabidopsis thaliana OX=3702 GN=RPL27C PE=2 SV=2	0	5.844	16	2	3	2	1	135	15.6	10.26	2.22	2	0
High	Master Protein Candidate	A8MS28	Ribosomal L27e protein family OS=Arabidopsis thaliana OX=3702 GN=At4g15000 PE=4 SV=1	0	5.844	17	2	3	2	1	131	15	10.15	2.22	2	0
High	None	Q9FJU0	Malate dehydrogenase 3, cytoplasmic OS=Arabidopsis thaliana OX=3702 GN=MDH3 PE=2 SV=1	0	5.835	5	1	2	1	1	339	36.8	6.1	8.63	1	0
High	None	A0A178UAN5	Malate dehydrogenase OS=Arabidopsis thaliana OX=3702 GN=c-NAD-MDH3 PE=3 SV=1	0	5.835	4	1	2	1	1	372	40.8	5.91	8.63	1	0
High	Master Protein	Q9SUR0	AT4G23670 protein OS=Arabidopsis thaliana OX=3702 GN=At4g23670 PE=2 SV=1	0	5.827	16	2	3	2	1	151	17.5	6.37	5.2	2	0
High	Master Protein	Q9SCY0	Phosphoglucomutase, chloroplastic OS=Arabidopsis thaliana OX=3702 GN=PGMP PE=1 SV=2	0	5.792	3	1	1	1	1	623	67.9	5.74	3.29	1	0
High	Master Protein	Q945K7	Isocitrate dehydrogenase [NAD] catalytic subunit 5, mitochondrial OS=Arabidopsis thaliana OX=3702 GN=IDH5 PE=1 SV=1	0	5.756	5	1	2	1	1	374	40.6	6.79	5.77	1	0
High	Master Protein	Q9LUE6	Probable UDP-arabinopyranose mutase 4 OS=Arabidopsis thaliana OX=3702 GN=RGP4 PE=1 SV=1	0	5.693	5	2	4	2	1	364	41.8	7.03	9.95	2	0
High	Master Protein Candidate	O22666	UDP-arabinopyranose mutase 3 OS=Arabidopsis thaliana OX=3702 GN=RGP3 PE=1 SV=2	0	5.693	5	2	4	2	1	362	41.3	5.6	9.95	2	0
High	Master Protein Candidate	Q9SRT9	UDP-arabinopyranose mutase 1 OS=Arabidopsis thaliana OX=3702 GN=RGP1 PE=1 SV=1	0	5.693	5	2	4	2	1	357	40.6	5.92	9.95	2	0
High	Master Protein Candidate	Q9LFW1	UDP-arabinopyranose mutase 2 OS=Arabidopsis thaliana OX=3702 GN=RGP2 PE=1 SV=1	0	5.693	5	2	4	2	1	360	40.9	6.13	9.95	2	0
High	Master Protein	P34790	Peptidyl-prolyl cis-trans isomerase CYP18-3 OS=Arabidopsis thaliana OX=3702 GN=CYP18-3 PE=1 SV=1	0	5.657	19	2	4	2	1	172	18.4	7.81	2.33	2	0
High	Master Protein	O49485	D-3-phosphoglycerate dehydrogenase 1, chloroplastic OS=Arabidopsis thaliana OX=3702 GN=PGDH1 PE=1 SV=1	0	5.639	6	2	3	2	1	603	63.3	6.58	9.3	2	0
High	Master Protein	O65398	Lactoylglutathione lyase GLX1 OS=Arabidopsis thaliana OX=3702 GN=GLX1 PE=1 SV=1	0	5.623	8	2	2	2	1	283	31.9	5.27	5.5	2	0
High	Master Protein	Q8RXU5	60S ribosomal protein L37a-2 OS=Arabidopsis thaliana OX=3702 GN=RPL37AC PE=3 SV=1	0	5.611	17	1	2	1	1	92	10.2	10.23	8.97	1	0
High	Master Protein Candidate	Q9SRK6	Putative 60S ribosomal protein L37a-1 OS=Arabidopsis thaliana OX=3702 GN=RPL37AB PE=3 SV=1	0	5.611	17	1	2	1	1	92	10.4	10.32	8.97	1	0
High	None	A0A1P8B993	Aldolase-type TIM barrel family protein OS=Arabidopsis thaliana OX=3702 GN=GOX3 PE=1 SV=1	0	5.601	7	2	4	0	2	259	29	8.65	11.51	2	0
High	Master Protein	P59223	40S ribosomal protein S13-1 OS=Arabidopsis thaliana OX=3702 GN=RPS13A PE=2 SV=1	0	5.566	15	2	4	2	1	151	17.1	10.39	10.12	2	0
High	Master Protein Candidate	P59224	40S ribosomal protein S13-2 OS=Arabidopsis thaliana OX=3702 GN=RPS13B PE=2 SV=1	0	5.566	15	2	4	2	1	151	17.1	10.39	10.12	2	0
High	Master Protein Candidate	Q8LFC0	Isocitrate dehydrogenase [NAD] regulatory subunit 1, mitochondrial OS=Arabidopsis thaliana OX=3702 GN=IDH1 PE=1 SV=2	0	5.565	4	1	2	1	1	367	39.6	8.13	5.85	1	0
High	Master Protein	O81796	Isocitrate dehydrogenase [NAD] regulatory subunit 3, mitochondrial OS=Arabidopsis thaliana OX=3702 GN=IDH3 PE=1 SV=1	0	5.565	4	1	2	1	1	368	39.9	7.44	5.85	1	0
High	Master Protein	Q9FL44	Protein MAINTENANCE OF PSII UNDER HIGH LIGHT 1 OS=Arabidopsis thaliana OX=3702 GN=MPH1 PE=1 SV=1	0	5.546	6	1	2	1	1	235	24.4	4.75	9.45	1	0
High	Master Protein Candidate	P29511	Tubulin alpha-6 chain OS=Arabidopsis thaliana OX=3702 GN=TUBA6 PE=1 SV=1	0	5.512	3	1	2	1	1	450	49.5	5.06	8.17	1	0
High	Master Protein	B9DGT7	Tubulin alpha-2 chain OS=Arabidopsis thaliana OX=3702 GN=TUBA2 PE=2 SV=2	0	5.512	3	1	2	1	1	450	49.5	5.06	8.17	1	0
High	Master Protein Candidate	B9DFF8	Tubulin alpha chain OS=Arabidopsis thaliana OX=3702 GN=TUA6 PE=2 SV=1	0	5.512	4	1	2	1	1	427	47.2	8.09	8.17	1	0
High	Master Protein Candidate	B9DHQ0	Tubulin alpha-5 chain OS=Arabidopsis thaliana OX=3702 GN=TUBA5 PE=1 SV=2	0	5.512	3	1	2	1	1	450	49.6	5.1	8.17	1	0
High	None	A0A1P8B5G9	Chloroplast thylakoid lumen protein OS=Arabidopsis thaliana OX=3702 GN=At4g02530 PE=4 SV=1	0	5.468	8	1	2	1	1	249	28	9.42	10.04	1	0
High	Master Protein	O04603	50S ribosomal protein L5, chloroplastic OS=Arabidopsis thaliana OX=3702 GN=RPL5 PE=2 SV=1	0	5.462	16	4	6	4	1	262	28.3	9.99	13.86	4	0
High	None	F4KC80	Photosystem I reaction center subunit PSI-N, chloroplast, putative / PSI-N, putative (PSAN) OS=Arabidopsis thaliana OX=3702 GN=PSAN PE=1 SV=1	0	5.46	13	2	3	2	1	181	19.3	9.32	10.28	2	0
High	Master Protein	Q8L7K9	NAD-dependent malic enzyme 2, mitochondrial OS=Arabidopsis thaliana OX=3702 GN=NAD-ME2 PE=1 SV=1	0	5.423	3	1	1	1	1	607	66.6	7.06	3.71	1	0
High	None	Q9LK36	Adenosylhomocysteinase 2 OS=Arabidopsis thaliana OX=3702 GN=SAHH2 PE=2 SV=1	0	5.422	3	1	2	1	1	485	53.1	5.74	7.25	1	0
High	None	A8MQP1	S-adenosyl-L-homocysteine hydrolase OS=Arabidopsis thaliana OX=3702 GN=HOG1 PE=4 SV=1	0	5.422	4	1	2	1	1	325	35.5	5.16	7.25	1	0
High	Master Protein	Q9XI93	At1g13930/F16A14.27 OS=Arabidopsis thaliana OX=3702 GN=F7A19.2 PE=1 SV=1	0	5.422	9	1	2	1	1	155	16.2	4.92	7.07	1	0
High	Master Protein	O23138	Cytochrome c-1 OS=Arabidopsis thaliana OX=3702 GN=CYTC-1 PE=1 SV=1	0	5.379	17	2	3	2	1	114	12.4	9.31	7.44	2	0
High	Master Protein Candidate	Q9T0G2	Cytochrome c-2 OS=Arabidopsis thaliana OX=3702 GN=CYTC-2 PE=1 SV=1	0	5.379	17	2	3	2	1	112	12.2	9.32	7.44	2	0
High	Master Protein	Q9M2D8	Uncharacterized protein At3g61260 OS=Arabidopsis thaliana OX=3702 GN=At3g61260 PE=1 SV=1	0	5.367	7	1	2	1	1	212	23.1	5.64	8.64	1	0
High	Master Protein	Q8H1E2	Malate dehydrogenase [NADP], chloroplastic OS=Arabidopsis thaliana OX=3702 GN=At5g58330 PE=2 SV=1	0	5.366	3	1	1	1	1	443	48.3	6.16	3.65	1	0
High	Master Protein Candidate	F4KEX3	Malate dehydrogenase OS=Arabidopsis thaliana OX=3702 GN=MCK7.20 PE=3 SV=1	0	5.366	4	1	1	1	1	334	36.4	5.07	3.65	1	0
High	Master Protein	P93014	30S ribosomal protein S5, chloroplastic OS=Arabidopsis thaliana OX=3702 GN=rps5 PE=2 SV=1	0	5.36	11	2	3	2	1	303	32.6	8.97	10.38	2	0
High	Master Protein	Q9FWS4	50S ribosomal protein L31, chloroplastic OS=Arabidopsis thaliana OX=3702 GN=RPL31 PE=2 SV=1	0	5.35	10	1	2	1	1	144	16	9.8	7.7	1	0
High	Master Protein	O04309	Jacalin-related lectin 35 OS=Arabidopsis thaliana OX=3702 GN=JAL35 PE=1 SV=1	0	5.342	5	2	3	2	1	451	48.5	5.26	9.04	2	0
High	Master Protein Candidate	A0A1I9LQM9	Mannose-binding lectin superfamily protein OS=Arabidopsis thaliana OX=3702 GN=JR1 PE=4 SV=1	0	5.342	8	2	3	2	1	297	32	5.55	9.04	2	0
High	Master Protein Candidate	F4HZN9	Protein disulfide-isomerase OS=Arabidopsis thaliana OX=3702 GN=PDIL1-1 PE=3 SV=1	0	5.32	4	2	4	1	1	487	54.1	5.08	8.8	2	0
High	Master Protein	Q9XI01	Protein disulfide isomerase-like 1-1 OS=Arabidopsis thaliana OX=3702 GN=PDIL1-1 PE=1 SV=1	0	5.32	4	2	4	1	1	501	55.6	4.92	8.8	2	1
High	Master Protein	Q9SUX0	Bifunctional inhibitor/lipid-transfer protein/seed storage 2S albumin superfamily protein OS=Arabidopsis thaliana OX=3702 GN=At4g22490 PE=2 SV=1	0	5.318	17	2	4	2	1	120	12.8	7.88	11.37	2	0
High	Master Protein	Q9SAU2	D-ribulose-5-phosphate-3-epimerase OS=Arabidopsis thaliana OX=3702 GN=RPE PE=2 SV=1	0	5.317	6	1	2	1	1	281	30	8.07	8.52	1	0
High	None	A0A1P8B3B6	Beta-adaptin-like protein OS=Arabidopsis thaliana OX=3702 GN=At4g23460 PE=3 SV=1	0	5.306	3	1	1	1	1	799	88.4	4.87	3.59	1	0
High	Master Protein	O48832	Protein EARLY-RESPONSIVE TO DEHYDRATION 7, chloroplastic OS=Arabidopsis thaliana OX=3702 GN=ERD7 PE=1 SV=1	0	5.305	3	1	2	1	1	452	49	5.41	7.08	1	0
High	Master Protein Candidate	A0A1P8AYB1	Senescence/dehydration-associated protein-like protein OS=Arabidopsis thaliana OX=3702 GN=ERD7 PE=1 SV=1	0	5.305	4	1	2	1	1	394	43	5	7.08	1	0
High	Master Protein Candidate	B3H4N7	60S acidic ribosomal protein family OS=Arabidopsis thaliana OX=3702 GN=MJB24.10 PE=3 SV=1	0	5.304	15	1	2	1	1	119	11.8	4.51	5.65	1	0
High	Master Protein Candidate	F4KAM0	60S acidic ribosomal protein family OS=Arabidopsis thaliana OX=3702 GN=MJB24.10 PE=4 SV=1	0	5.304	20	1	2	1	1	89	8.9	5.29	5.65	1	0
High	Master Protein	Q9LVC9	60S acidic ribosomal protein P3-2 OS=Arabidopsis thaliana OX=3702 GN=RPP3B PE=2 SV=1	0	5.304	15	1	2	1	1	120	11.9	4.51	5.65	1	0
High	Master Protein	Q9SCT5	AT3g51730/T18N14_110 OS=Arabidopsis thaliana OX=3702 GN=T18N14.110 PE=2 SV=1	0	5.297	8	1	1	1	1	213	24.1	5.11	4.49	1	0
High	Master Protein	Q9ZPY5	At2g46540/F11C10.23 OS=Arabidopsis thaliana OX=3702 GN=At2g46540 PE=2 SV=2	0	5.267	22	1	1	1	1	65	6.8	8.92	3.94	1	0
High	Master Protein	O65355	Gamma-glutamyl hydrolase 2 OS=Arabidopsis thaliana OX=3702 GN=GGH2 PE=1 SV=2	0	5.263	5	1	1	1	1	347	38.6	7.14	3.54	1	0
High	Master Protein Candidate	F4IBT7	Folate gamma-glutamyl hydrolase OS=Arabidopsis thaliana OX=3702 GN=GGH2 PE=4 SV=1	0	5.263	5	1	1	1	1	333	36.9	7.14	3.54	1	0
High	Master Protein	P43082	Hevein-like preproprotein OS=Arabidopsis thaliana OX=3702 GN=HEL PE=1 SV=1	0	5.24	8	1	2	1	1	212	22.9	7.65	7.65	1	0
High	Master Protein Candidate	Q9CAV0	40S ribosomal protein S3a-1 OS=Arabidopsis thaliana OX=3702 GN=RPS3AA PE=1 SV=3	0	5.239	8	2	4	2	1	262	29.8	9.76	8.63	2	0
High	Master Protein	Q42262	40S ribosomal protein S3a-2 OS=Arabidopsis thaliana OX=3702 GN=RPS3AB PE=2 SV=3	0	5.239	8	2	4	2	1	262	29.8	9.74	8.63	2	0
High	Master Protein Candidate	F4JVC0	Cold, circadian rhythm, and RNA binding 1 OS=Arabidopsis thaliana OX=3702 GN=CCR1 PE=4 SV=1	0	5.224	25	2	3	2	1	92	10.2	4.79	8.91	2	0
High	Master Protein Candidate	F4JVC1	Cold, circadian rhythm, and RNA binding 1 OS=Arabidopsis thaliana OX=3702 GN=CCR1 PE=4 SV=1	0	5.224	18	2	3	2	1	126	12.8	5.07	8.91	2	0
High	Master Protein Candidate	F4JVB9	Cold, circadian rhythm, and RNA binding 1 OS=Arabidopsis thaliana OX=3702 GN=CCR1 PE=4 SV=1	0	5.224	22	2	3	2	1	105	10.9	4.88	8.91	2	0
High	Master Protein	Q03251	Glycine-rich RNA-binding protein 8 OS=Arabidopsis thaliana OX=3702 GN=RBG8 PE=1 SV=1	0	5.224	14	2	3	2	1	169	16.6	5.68	8.91	2	0
High	None	A0A1I9LMX7	Beta glucosidase 43 OS=Arabidopsis thaliana OX=3702 GN=BGLU43 PE=3 SV=1	0	5.211	7	1	1	1	1	233	26.7	6.42	4.36	1	0
High	Master Protein	Q501F7	At1g21440 OS=Arabidopsis thaliana OX=3702 GN=At1g21440 PE=2 SV=1	0	5.2	4	1	2	1	1	336	36.3	7.15	6.85	1	0
High	Master Protein	Q8LAS8	S-formylglutathione hydrolase OS=Arabidopsis thaliana OX=3702 GN=SFGH PE=1 SV=2	0	5.195	5	1	2	1	1	284	31.6	6.37	8.07	1	0
High	None	A8MRH4	AT2G01250 protein OS=Arabidopsis thaliana OX=3702 GN=At2g01250 PE=1 SV=1	0	5.171	12	4	7	0	2	184	21.5	10.1	3.59	4	0
High	Master Protein	O49203	Nucleoside diphosphate kinase III, chloroplastic/mitochondrial OS=Arabidopsis thaliana OX=3702 GN=NDPK3 PE=1 SV=1	0	5.132	17	3	7	3	1	238	25.7	9.23	7.16	3	0
High	Master Protein	Q9XFH9	Thioredoxin F2, chloroplastic OS=Arabidopsis thaliana OX=3702 GN=At5g16400 PE=2 SV=1	0	5.111	6	1	1	1	1	185	20	8.82	4.1	1	0
High	Master Protein	Q9LY74	2-methyl-6-phytyl-1,4-hydroquinone methyltransferase, chloroplastic OS=Arabidopsis thaliana OX=3702 GN=VTE3 PE=1 SV=1	0	5.076	5	1	1	1	1	338	37.9	9.1	4.62	1	0
High	Master Protein Candidate	Q9LZF6	Cell division control protein 48 homolog E OS=Arabidopsis thaliana OX=3702 GN=CDC48E PE=2 SV=2	0	5.069	2	1	2	1	1	810	89.9	5.2	7.59	1	0
High	Master Protein Candidate	P54609	Cell division control protein 48 homolog A OS=Arabidopsis thaliana OX=3702 GN=CDC48A PE=1 SV=1	0	5.069	2	1	2	1	1	809	89.3	5.25	7.59	1	0
High	Master Protein	Q9SCN8	Cell division control protein 48 homolog D OS=Arabidopsis thaliana OX=3702 GN=CDC48D PE=1 SV=1	0	5.069	2	1	2	1	1	815	90.3	5.16	7.59	1	0
High	Master Protein	Q9S834	ATP-dependent Clp protease proteolytic subunit 5, chloroplastic OS=Arabidopsis thaliana OX=3702 GN=CLPP5 PE=1 SV=1	0	5.016	5	1	1	1	1	298	32.3	8.24	3.59	1	0
High	Master Protein	Q9SD45	AT3g51000/F24M12_40 OS=Arabidopsis thaliana OX=3702 GN=F24M12.40 PE=2 SV=1	0	4.999	4	1	1	1	1	323	36.7	5.63	4.44	1	0
High	Master Protein	Q9C891	Dirigent protein 20 OS=Arabidopsis thaliana OX=3702 GN=DIR20 PE=2 SV=1	0	4.992	13	2	4	2	1	187	20.6	9.42	11.27	2	0
High	Master Protein	Q38799	Pyruvate dehydrogenase E1 component subunit beta-1, mitochondrial OS=Arabidopsis thaliana OX=3702 GN=PDH2 PE=1 SV=2	0	4.947	4	1	1	1	1	363	39.2	5.83	3.88	1	0
High	Master Protein	Q9SU81	Alkaline-phosphatase-like family protein OS=Arabidopsis thaliana OX=3702 GN=At4g29700 PE=2 SV=1	0	4.933	3	1	1	1	1	461	51.6	7.78	2.7	1	0
High	Master Protein Candidate	P42795	60S ribosomal protein L11-1 OS=Arabidopsis thaliana OX=3702 GN=RPL11A PE=2 SV=2	0	4.927	8	1	2	1	1	182	20.8	9.92	6.28	1	0
High	Master Protein	P42794	60S ribosomal protein L11-2 OS=Arabidopsis thaliana OX=3702 GN=RPL11B PE=2 SV=2	0	4.927	8	1	2	1	1	182	20.8	9.92	6.28	1	0
High	Master Protein	A0A1I9LT02	UTP--glucose-1-phosphate uridylyltransferase OS=Arabidopsis thaliana OX=3702 GN=UGP1 PE=1 SV=1	0	4.911	4	2	3	2	1	478	52.8	6.24	8.42	2	0
High	Master Protein Candidate	Q9M9P3	UTP--glucose-1-phosphate uridylyltransferase 2 OS=Arabidopsis thaliana OX=3702 GN=UGP2 PE=1 SV=1	0	4.911	4	2	3	2	1	469	51.7	6.13	8.42	2	0
High	Master Protein Candidate	A0A1I9LT03	UTP--glucose-1-phosphate uridylyltransferase OS=Arabidopsis thaliana OX=3702 GN=UGP1 PE=1 SV=1	0	4.911	5	2	3	2	1	463	51.1	6.48	8.42	2	0
High	None	Q94C74	Serine hydroxymethyltransferase 2, mitochondrial OS=Arabidopsis thaliana OX=3702 GN=SHM2 PE=1 SV=2	0	4.871	3	2	4	2	1	517	57.3	8.75	10.2	2	0
High	Master Protein	O23016	Probable voltage-gated potassium channel subunit beta OS=Arabidopsis thaliana OX=3702 GN=KAB1 PE=1 SV=1	0	4.856	7	2	3	2	1	328	36.5	7.42	8.38	2	0
High	Master Protein	O23523	RGG repeats nuclear RNA binding protein A OS=Arabidopsis thaliana OX=3702 GN=RGGA PE=1 SV=1	0	4.83	4	1	2	1	1	355	37.4	8.06	7.21	1	0
High	Master Protein	Q9SKI0	At2g10940/F15K19.1 OS=Arabidopsis thaliana OX=3702 GN=At2g10940 PE=2 SV=1	0	4.823	4	1	2	1	1	291	29.6	9.39	7.53	1	0
High	None	B3H7J6	Ribosomal protein S4 OS=Arabidopsis thaliana OX=3702 GN=At5g15200 PE=1 SV=1	0	4.812	11	2	3	2	1	156	18.8	9.8	8.11	2	0
High	Master Protein	Q9XJ35	ATP-dependent Clp protease proteolytic subunit-related protein 1, chloroplastic OS=Arabidopsis thaliana OX=3702 GN=CLPR1 PE=1 SV=1	0	4.791	8	2	4	2	1	387	42.6	8.63	7.07	2	0
High	Master Protein	Q9LV60	Cysteine-rich repeat secretory protein 55 OS=Arabidopsis thaliana OX=3702 GN=CRRSP55 PE=2 SV=1	0	4.787	5	1	2	1	1	263	29	8.57	7.26	1	0
High	Master Protein	Q43314	Glutamate dehydrogenase 1 OS=Arabidopsis thaliana OX=3702 GN=GDH1 PE=2 SV=1	0	4.785	4	2	4	1	1	411	44.5	6.86	6.75	2	0
High	None	P27323	Heat shock protein 90-1 OS=Arabidopsis thaliana OX=3702 GN=HSP90-1 PE=1 SV=3	0	4.784	3	2	4	2	1	700	80.6	5.05	6.25	2	0
High	Master Protein	P56766	Photosystem I P700 chlorophyll a apoprotein A1 OS=Arabidopsis thaliana OX=3702 GN=psaA PE=2 SV=1	0	4.757	2	2	6	2	1	750	83.2	7.11	9.67	2	0
High	Master Protein	P55228	Glucose-1-phosphate adenylyltransferase small subunit, chloroplastic OS=Arabidopsis thaliana OX=3702 GN=APS1 PE=2 SV=2	0	4.751	2	1	2	1	1	520	56.6	6.57	6.03	1	0
High	Master Protein	O80837	Remorin OS=Arabidopsis thaliana OX=3702 GN=DBP PE=1 SV=1	0	4.733	7	1	2	1	1	190	21	8.54	6.46	1	0
High	None	F4KAP2	Adenylate kinase 1 OS=Arabidopsis thaliana OX=3702 GN=ADK1 PE=1 SV=1	0	4.721	17	2	3	2	1	190	20.8	6.79	4.14	2	0
High	Master Protein	P42732	30S ribosomal protein S13, chloroplastic OS=Arabidopsis thaliana OX=3702 GN=RPS13 PE=2 SV=1	0	4.707	16	2	3	2	1	169	19.1	10.26	5.66	2	0
High	Master Protein Candidate	B3H631	Ribosomal protein S13/S18 family OS=Arabidopsis thaliana OX=3702 GN=EMB3137 PE=3 SV=1	0	4.707	21	2	3	2	1	128	14.4	8.06	5.66	2	0
High	None	F4JB06	Ribosomal protein S5/Elongation factor G/III/V family protein OS=Arabidopsis thaliana OX=3702 GN=MGH6.2 PE=4 SV=2	0	4.701	3	2	2	2	1	788	87.8	5.94	0	2	0
High	Master Protein Candidate	B9DFC0	AT4G08870 protein OS=Arabidopsis thaliana OX=3702 GN=ARGAH2 PE=2 SV=1	0	4.642	5	1	2	1	1	263	29.3	7.12	8.09	1	0
High	Master Protein	Q9ZPF5	Arginase 2, chloroplastic/mitochondrial OS=Arabidopsis thaliana OX=3702 GN=ARGAH2 PE=1 SV=1	0	4.642	4	1	2	1	1	344	38	6.32	8.09	1	0
High	Master Protein	Q42529	Tryptophan synthase alpha chain, chloroplastic OS=Arabidopsis thaliana OX=3702 GN=TSA1 PE=1 SV=1	0	4.639	7	1	1	1	1	312	33.2	7.28	3.82	1	0
High	Master Protein	Q94F10	Transmembrane protein, putative (DUF1118) OS=Arabidopsis thaliana OX=3702 GN=At1g74730 PE=1 SV=1	0	4.594	7	1	2	1	1	198	20.7	9.31	6.28	1	0
High	Master Protein	P56774	Cytochrome b6-f complex subunit 4 OS=Arabidopsis thaliana OX=3702 GN=petD PE=3 SV=1	0	4.588	6	1	4	1	1	160	17.4	7.18	10.83	1	0
High	Master Protein Candidate	Q9M158	Rhodanese-like domain-containing protein 4, chloroplastic OS=Arabidopsis thaliana OX=3702 GN=STR4 PE=1 SV=2	0	4.56	3	1	2	1	1	466	49.4	5.3	8.38	1	0
High	Master Protein	A0A1P8B8J7	Thylakoid rhodanese-like protein OS=Arabidopsis thaliana OX=3702 GN=TROL PE=4 SV=1	0	4.56	3	1	2	1	1	507	54.4	5.16	8.38	1	0
High	Master Protein	Q9C7S3	Inner membrane localized protein OS=Arabidopsis thaliana OX=3702 GN=At1g42960 PE=2 SV=1	0	4.558	10	1	1	1	1	168	17.8	8.43	4.27	1	0
High	Master Protein	Q9XFH8	Thioredoxin F1, chloroplastic OS=Arabidopsis thaliana OX=3702 GN=At3g02730 PE=1 SV=2	0	4.55	7	1	2	1	1	178	19.3	8.92	6.6	1	0
High	Master Protein Candidate	O04019	26S proteasome regulatory subunit 6A homolog B OS=Arabidopsis thaliana OX=3702 GN=RPT5B PE=1 SV=3	0	4.544	6	2	3	1	1	423	47	5.02	8.53	2	0
High	Master Protein	Q9SEI2	26S proteasome regulatory subunit 6A homolog A OS=Arabidopsis thaliana OX=3702 GN=RPT5A PE=1 SV=1	0	4.544	6	2	3	1	1	424	47.5	5.03	8.53	2	1
High	Master Protein Candidate	Q04613	ATP synthase protein MI25 OS=Arabidopsis thaliana OX=3702 GN=AtMg00640 PE=1 SV=2	0	4.534	6	1	2	1	1	192	21.7	9.39	6.1	1	0
High	Master Protein	A0A2P2CLH9	ATPase subunit 4 OS=Arabidopsis thaliana OX=3702 GN=atp4 PE=4 SV=1	0	4.534	6	1	2	1	1	192	21.7	9.54	6.1	1	0
High	Master Protein Candidate	Q9LZT0	Histone H2B.7 OS=Arabidopsis thaliana OX=3702 GN=At3g46030 PE=1 SV=3	0	4.478	17	2	4	2	1	145	15.9	10.02	11.08	2	0
High	Master Protein Candidate	O23629	Histone H2B.6 OS=Arabidopsis thaliana OX=3702 GN=H2B PE=1 SV=3	0	4.478	16	2	4	2	1	150	16.4	10.02	11.08	2	0
High	Master Protein	Q9SI96	Histone H2B.3 OS=Arabidopsis thaliana OX=3702 GN=At2g28720 PE=1 SV=3	0	4.478	16	2	4	2	1	151	16.5	9.99	11.08	2	0
High	Master Protein Candidate	Q9FFC0	Histone H2B.10 OS=Arabidopsis thaliana OX=3702 GN=At5g22880 PE=1 SV=3	0	4.478	17	2	4	2	1	145	15.7	10.05	11.08	2	0
High	Master Protein Candidate	P40283	Histone H2B.11 OS=Arabidopsis thaliana OX=3702 GN=At5g59910 PE=1 SV=5	0	4.478	16	2	4	2	1	150	16.4	9.99	11.08	2	0
High	Master Protein Candidate	Q9LZ45	Histone H2B.9 OS=Arabidopsis thaliana OX=3702 GN=At5g02570 PE=1 SV=3	0	4.478	18	2	4	2	1	132	14.5	10.07	11.08	2	0
High	Master Protein Candidate	Q9LQQ4	Histone H2B.1 OS=Arabidopsis thaliana OX=3702 GN=At1g07790 PE=1 SV=3	0	4.478	16	2	4	2	1	148	16.4	10.05	11.08	2	0
High	Master Protein Candidate	Q9ZUS0	Histone H2B.4 OS=Arabidopsis thaliana OX=3702 GN=At2g37470 PE=1 SV=3	0	4.478	17	2	4	2	1	138	15.1	10.05	11.08	2	0
High	Master Protein	Q9LS03	Allene oxide cyclase 1, chloroplastic OS=Arabidopsis thaliana OX=3702 GN=AOC1 PE=1 SV=1	0	4.472	5	1	2	1	1	254	27.8	9.09	6.13	1	0
High	Master Protein Candidate	F4K2P2	Plastid-lipid associated protein PAP / fibrillin family protein OS=Arabidopsis thaliana OX=3702 GN=At5g19940 PE=1 SV=1	0	4.439	6	1	1	1	1	235	26	9.33	2.66	1	0
High	Master Protein	Q941D3	Probable plastid-lipid-associated protein 8, chloroplastic OS=Arabidopsis thaliana OX=3702 GN=PAP8 PE=1 SV=1	0	4.439	5	1	1	1	1	239	26.5	9.47	2.66	1	0
High	Master Protein	P32746	Dihydroorotate dehydrogenase (quinone), mitochondrial OS=Arabidopsis thaliana OX=3702 GN=PYRD PE=1 SV=2	0	4.437	5	1	2	1	1	460	48.5	9.2	6.2	1	0
High	Master Protein	Q39101	Ferritin-1, chloroplastic OS=Arabidopsis thaliana OX=3702 GN=FER1 PE=2 SV=1	0	4.41	11	1	1	1	1	255	28.2	6.11	4.03	1	0
High	Master Protein	Q42044	At2g45180 OS=Arabidopsis thaliana OX=3702 GN=At2g45180 PE=2 SV=2	0	4.396	11	2	3	2	1	134	13.9	9	8.23	2	0
High	Master Protein Candidate	Q8W1X2	Pyridoxal kinase OS=Arabidopsis thaliana OX=3702 GN=PK PE=1 SV=2	0	4.377	5	1	1	1	1	309	34	5.83	3.56	1	0
High	Master Protein	F4K8N1	PfkB-like carbohydrate kinase family protein OS=Arabidopsis thaliana OX=3702 GN=SOS4 PE=1 SV=1	0	4.377	4	1	1	1	1	315	35	7.06	3.56	1	0
High	Master Protein Candidate	Q39195	Photosystem II 5 kDa protein, chloroplastic OS=Arabidopsis thaliana OX=3702 GN=PSBT PE=3 SV=2	0	4.372	12	1	2	1	1	103	11	9.48	6.8	1	0
High	Master Protein	A0A1I9LS90	Photosystem II subunit T OS=Arabidopsis thaliana OX=3702 GN=PSBTN PE=4 SV=1	0	4.372	8	1	2	1	1	143	15.6	9.63	6.8	1	0
High	None	A0A1I9LPQ6	Glyoxylate reductase 1 OS=Arabidopsis thaliana OX=3702 GN=GLYR1 PE=1 SV=1	0	4.343	7	1	2	1	1	207	22	5.44	4.95	1	0
High	None	A0A1I9LRM3	Auxin-induced in root cultures-like protein OS=Arabidopsis thaliana OX=3702 GN=AIR12 PE=1 SV=1	0	4.336	7	1	2	1	1	164	17.4	8.69	7.18	1	0
High	Master Protein	Q9SV68	Chloroplast envelope quinone oxidoreductase homolog OS=Arabidopsis thaliana OX=3702 GN=CEQORH PE=1 SV=1	0	4.334	12	2	2	2	1	329	34.4	8.95	3.39	2	0
High	Master Protein	Q9SHG8	At1g17100 OS=Arabidopsis thaliana OX=3702 GN=AtHBP1 PE=2 SV=1	0	4.33	7	1	2	1	1	232	25.4	4.92	7.46	1	0
High	Master Protein	B3H604	Glutaredoxin family protein OS=Arabidopsis thaliana OX=3702 GN=GRXC2 PE=4 SV=1	0	4.318	10	1	2	1	1	136	14.9	5.87	7.83	1	0
High	Master Protein Candidate	Q9FNE2	Glutaredoxin-C2 OS=Arabidopsis thaliana OX=3702 GN=GRXC2 PE=3 SV=1	0	4.318	13	1	2	1	1	111	11.7	7.24	7.83	1	0
High	Master Protein	P82538	PsbP-like protein 1, chloroplastic OS=Arabidopsis thaliana OX=3702 GN=PPL1 PE=1 SV=1	0	4.311	13	2	3	2	1	230	25.6	9.35	4.39	2	0
High	None	F4JWS8	Cytochrome b-c1 complex subunit 7-2 OS=Arabidopsis thaliana OX=3702 GN=QCR7-2 PE=1 SV=1	0	4.301	9	1	2	1	1	122	14.6	9.83	5.87	1	0
High	None	F4JWS9	Cytochrome b-c1 complex subunit 7 OS=Arabidopsis thaliana OX=3702 GN=At5g25450 PE=3 SV=1	0	4.301	10	1	2	1	1	106	12.8	9.91	5.87	1	0
High	None	Q9LZH9	60S ribosomal protein L7a-2 OS=Arabidopsis thaliana OX=3702 GN=RPL7AB PE=2 SV=1	0	4.266	7	2	4	2	1	256	29	10.15	8.4	2	0
High	Master Protein	Q9ZWC4	At1g04040/F21M11_2 OS=Arabidopsis thaliana OX=3702 GN=F21M11.2 PE=2 SV=1	0	4.259	6	2	3	1	1	271	31.1	9.11	1.81	2	0
High	Master Protein Candidate	F4JA10	Presequence protease 1 OS=Arabidopsis thaliana OX=3702 GN=PREP1 PE=1 SV=1	0	4.253	1	1	1	1	1	1069	119.7	5.63	3.48	1	0
High	Master Protein	Q9LJL3	Presequence protease 1, chloroplastic/mitochondrial OS=Arabidopsis thaliana OX=3702 GN=PREP1 PE=1 SV=2	0	4.253	1	1	1	1	1	1080	120.9	5.68	3.48	1	0
High	Master Protein	Q41963	Aquaporin TIP1-2 OS=Arabidopsis thaliana OX=3702 GN=TIP1-2 PE=1 SV=2	0	4.249	7	1	2	1	1	253	25.8	5.06	0	1	0
High	Master Protein Candidate	F4IG85	SIN3 associated polypeptide P18 OS=Arabidopsis thaliana OX=3702 GN=SAP18 PE=4 SV=1	0	4.211	12	2	2	2	1	149	16.8	9.17	2.76	2	0
High	Master Protein	O64644	Histone deacetylase complex subunit SAP18 OS=Arabidopsis thaliana OX=3702 GN=At2g45640 PE=1 SV=1	0	4.211	12	2	2	2	1	152	17.2	9.17	2.76	2	0
High	Master Protein Candidate	Q8LD27	Proteasome subunit beta type-6 OS=Arabidopsis thaliana OX=3702 GN=PBA1 PE=1 SV=2	0	4.192	5	1	1	1	1	233	25.1	5.55	2.95	1	0
High	Master Protein	F4JRY2	Proteasome subunit beta OS=Arabidopsis thaliana OX=3702 GN=PBA1 PE=3 SV=1	0	4.192	5	1	1	1	1	234	25.3	5.55	2.95	1	0
High	Master Protein	O65282	20 kDa chaperonin, chloroplastic OS=Arabidopsis thaliana OX=3702 GN=CPN20 PE=1 SV=2	0	4.186	5	1	2	1	1	253	26.8	8.88	6.4	1	0
High	Master Protein	O65686	30S ribosomal protein S16-1, chloroplastic OS=Arabidopsis thaliana OX=3702 GN=RPS16-1 PE=2 SV=1	0	4.168	12	1	2	1	1	113	12.7	9.8	7.65	1	0
High	Master Protein Candidate	P47999	Cysteine synthase, chloroplastic/chromoplastic OS=Arabidopsis thaliana OX=3702 GN=OASB PE=1 SV=2	0	4.135	3	1	2	1	1	392	41.6	8.02	6.64	1	0
High	Master Protein Candidate	Q43725	Cysteine synthase, mitochondrial OS=Arabidopsis thaliana OX=3702 GN=OASC PE=1 SV=3	0	4.135	3	1	2	1	1	430	45.8	8.18	6.64	1	0
High	Master Protein	B9DFR6	Cysteine synthase OS=Arabidopsis thaliana OX=3702 GN=OASC PE=2 SV=1	0	4.135	3	1	2	1	1	433	46.1	8.37	6.64	1	0
High	Master Protein	P34789	40S ribosomal protein S28-2 OS=Arabidopsis thaliana OX=3702 GN=RPS28C PE=3 SV=1	0	4.126	19	1	2	1	1	64	7.3	11.17	5.83	1	0
High	None	P42762	Chaperone protein ClpD, chloroplastic OS=Arabidopsis thaliana OX=3702 GN=CLPD PE=1 SV=1	0	4.123	1	1	2	1	1	945	103.2	6.23	7.14	1	0
High	None	Q9SGC1	Probable phosphoglucomutase, cytoplasmic 2 OS=Arabidopsis thaliana OX=3702 GN=At1g70730 PE=1 SV=1	0	4.12	2	1	2	1	1	585	63.4	5.82	6.62	1	0
High	None	F4I6W3	Phosphoglucomutase/phosphomannomutase family protein OS=Arabidopsis thaliana OX=3702 GN=PGM2 PE=1 SV=1	0	4.12	2	1	2	1	1	605	65.5	5.72	6.62	1	0
High	None	F4I6W4	Phosphoglucomutase/phosphomannomutase family protein OS=Arabidopsis thaliana OX=3702 GN=PGM2 PE=1 SV=1	0	4.12	2	1	2	1	1	662	72.5	7.12	6.62	1	0
High	Master Protein	Q8VZC3	Delta-1-pyrroline-5-carboxylate dehydrogenase 12A1, mitochondrial OS=Arabidopsis thaliana OX=3702 GN=ALDH12A1 PE=2 SV=1	0	4.11	2	1	2	1	1	556	61.7	6.73	7.27	1	0
High	Master Protein	Q9FLC0	Peroxidase 52 OS=Arabidopsis thaliana OX=3702 GN=PER52 PE=2 SV=1	0	4.1	5	1	1	1	1	324	34.2	8.31	2.88	1	0
High	Master Protein	P24806	Xyloglucan endotransglucosylase/hydrolase protein 24 OS=Arabidopsis thaliana OX=3702 GN=XTH24 PE=1 SV=2	0	4.084	4	1	2	1	1	269	30.7	8.31	6.01	1	0
High	Master Protein	O48723	Patatin-like protein 2 OS=Arabidopsis thaliana OX=3702 GN=PLP2 PE=1 SV=1	0	4.073	4	1	1	1	1	407	44.2	5.91	3.37	1	0
High	Master Protein	Q8VYI4	Aspartate-semialdehyde dehydrogenase, putative OS=Arabidopsis thaliana OX=3702 GN=At1g14810 PE=2 SV=1	0	4.055	7	2	2	2	1	375	40.7	7.01	5.54	2	0
High	None	Q8RX72	Leucine aminopeptidase 3, chloroplastic OS=Arabidopsis thaliana OX=3702 GN=LAP3 PE=2 SV=1	0	4	2	1	2	0	2	581	61.3	6.7	5.78	1	0
High	None	A0A1P8B582	Cytosol aminopeptidase family protein OS=Arabidopsis thaliana OX=3702 GN=At4g30910 PE=3 SV=1	0	4	2	1	2	0	2	604	63.8	7.12	5.78	1	0
High	None	F4JFN3	Heat shock protein 90-6, mitochondrial OS=Arabidopsis thaliana OX=3702 GN=HSP90-6 PE=1 SV=1	0	3.992	2	1	2	1	1	799	90.5	5.39	5.87	1	0
High	Master Protein	P93032	Isocitrate dehydrogenase [NAD] regulatory subunit 2, mitochondrial OS=Arabidopsis thaliana OX=3702 GN=IDH2 PE=1 SV=2	0	3.988	4	1	2	1	1	367	39.6	6.55	2.76	1	0
High	Master Protein	P49205	40S ribosomal protein S17-1 OS=Arabidopsis thaliana OX=3702 GN=RPS17A PE=2 SV=3	0	3.968	9	1	2	1	1	141	16	10.04	4.54	1	0
High	Master Protein Candidate	Q9LZ17	40S ribosomal protein S17-4 OS=Arabidopsis thaliana OX=3702 GN=RPS17D PE=2 SV=3	0	3.968	9	1	2	1	1	141	16	10.04	4.54	1	0
High	Master Protein Candidate	Q9SJ36	40S ribosomal protein S17-2 OS=Arabidopsis thaliana OX=3702 GN=RPS17B PE=2 SV=3	0	3.968	9	1	2	1	1	140	15.9	10.04	4.54	1	0
High	Master Protein Candidate	Q9SQZ1	40S ribosomal protein S17-3 OS=Arabidopsis thaliana OX=3702 GN=RPS17C PE=2 SV=3	0	3.968	9	1	2	1	1	140	16	10.04	4.54	1	0
High	Master Protein	Q9LVT8	RGG repeats nuclear RNA binding protein C OS=Arabidopsis thaliana OX=3702 GN=RGGC PE=1 SV=1	0	3.965	4	1	2	1	1	357	38	8.78	7.45	1	0
High	None	P46010	Nitrilase 3 OS=Arabidopsis thaliana OX=3702 GN=NIT3 PE=1 SV=1	0	3.962	6	1	2	1	1	346	38	5.95	6.38	1	0
High	Master Protein	Q9S7N7	Photosystem I reaction center subunit V, chloroplastic OS=Arabidopsis thaliana OX=3702 GN=PSAG PE=1 SV=1	0	3.956	6	2	6	2	1	160	17.1	9.57	7.75	2	0
High	Master Protein Candidate	Q9ZVQ3	Glutathione S-transferase Z1 OS=Arabidopsis thaliana OX=3702 GN=GSTZ1 PE=1 SV=1	0	3.943	6	1	2	1	1	221	24.9	5.85	7.21	1	0
High	Master Protein	Q9ZVQ4	Glutathione S-transferase Z2 OS=Arabidopsis thaliana OX=3702 GN=GSTZ2 PE=3 SV=1	0	3.943	6	1	2	1	1	223	25.3	5.85	7.21	1	0
High	Master Protein Candidate	F4IQD1	Glutathione S-transferase zeta 1 OS=Arabidopsis thaliana OX=3702 GN=GSTZ1 PE=3 SV=1	0	3.943	7	1	2	1	1	191	21.6	6.68	7.21	1	0
High	Master Protein Candidate	Q9SVR0	60S ribosomal protein L13a-3 OS=Arabidopsis thaliana OX=3702 GN=RPL13AC PE=2 SV=1	0	3.942	6	1	3	1	1	206	23.6	10.39	3.01	1	0
High	Master Protein Candidate	Q9FKC0	60S ribosomal protein L13a-4 OS=Arabidopsis thaliana OX=3702 GN=RPL13AD PE=2 SV=1	0	3.942	6	1	3	1	1	206	23.6	10.37	3.01	1	0
High	Master Protein Candidate	Q9SFU1	60S ribosomal protein L13a-1 OS=Arabidopsis thaliana OX=3702 GN=RPL13AA PE=2 SV=1	0	3.942	6	1	3	1	1	206	23.5	10.4	3.01	1	0
High	Master Protein	F4JD96	Ribosomal protein L13 family protein OS=Arabidopsis thaliana OX=3702 GN=At3g07110 PE=3 SV=1	0	3.942	6	1	3	1	1	207	23.6	10.4	3.01	1	0
High	Master Protein Candidate	Q9LRX8	60S ribosomal protein L13a-2 OS=Arabidopsis thaliana OX=3702 GN=RPL13AB PE=2 SV=1	0	3.942	6	1	3	1	1	206	23.4	10.35	3.01	1	0
High	None	Q9FFR3	6-phosphogluconate dehydrogenase, decarboxylating 3, chloroplastic OS=Arabidopsis thaliana OX=3702 GN=PGD3 PE=1 SV=1	0	3.915	2	1	2	1	1	487	53.3	5.8	6.95	1	0
High	None	Q9M5K2	Dihydrolipoyl dehydrogenase 2, mitochondrial OS=Arabidopsis thaliana OX=3702 GN=LPD2 PE=1 SV=1	0	3.91	4	2	3	2	1	507	54	7.03	6.64	2	0
High	Master Protein	O80774	AT2G34250 protein OS=Arabidopsis thaliana OX=3702 GN=At2g34250 PE=2 SV=1	0	3.903	5	1	1	1	1	475	52.1	9	3.97	1	0
High	Master Protein Candidate	Q8RWJ5	SecY protein transport family protein OS=Arabidopsis thaliana OX=3702 GN=At1g29310 PE=2 SV=1	0	3.903	5	1	1	1	1	475	52	9	3.97	1	0
High	Master Protein	Q9C9I7	Rieske (2Fe-2S) domain-containing protein OS=Arabidopsis thaliana OX=3702 GN=PSB33 PE=2 SV=1	0	3.889	5	1	2	1	1	287	31.7	8.73	6.76	1	0
High	Master Protein	O22788	Probable peroxygenase 3 OS=Arabidopsis thaliana OX=3702 GN=PXG3 PE=1 SV=1	0	3.881	5	1	2	1	1	236	26.6	5.34	3.69	1	0
High	Master Protein	F4I3J0	Obg-like ATPase 1 OS=Arabidopsis thaliana OX=3702 GN=At1g56050 PE=3 SV=1	0	3.876	4	1	1	1	1	421	45.6	5.97	3.52	1	0
High	Master Protein Candidate	A0A1P8B108	N-acetyl-gamma-glutamyl-phosphate reductase OS=Arabidopsis thaliana OX=3702 GN=At2g19940 PE=3 SV=1	0	3.873	3	1	1	1	1	389	42.8	7.85	2.85	1	0
High	Master Protein	Q93Z70	Probable N-acetyl-gamma-glutamyl-phosphate reductase, chloroplastic OS=Arabidopsis thaliana OX=3702 GN=At2g19940 PE=1 SV=2	0	3.873	3	1	1	1	1	401	44.1	8.29	2.85	1	0
High	Master Protein	P43333	U2 small nuclear ribonucleoprotein A' OS=Arabidopsis thaliana OX=3702 GN=At1g09760 PE=2 SV=2	0	3.857	6	1	2	1	1	249	28	6.05	8.31	1	0
High	Master Protein	F4JBK4	Chitinase family protein OS=Arabidopsis thaliana OX=3702 GN=At3g47540 PE=4 SV=1	0	3.855	5	1	2	1	1	283	31.2	9.36	4.8	1	0
High	Master Protein Candidate	Q9SN84	At3g47540 OS=Arabidopsis thaliana OX=3702 GN=F1P2.90 PE=2 SV=1	0	3.855	7	1	2	1	1	214	23.3	9.04	4.8	1	0
High	Master Protein Candidate	O24658	Endochitinase At2g43590 OS=Arabidopsis thaliana OX=3702 GN=At2g43590 PE=2 SV=1	0	3.855	5	1	2	1	1	264	28.3	8.05	4.8	1	0
High	Master Protein	Q8L7C9	Glutathione S-transferase U20 OS=Arabidopsis thaliana OX=3702 GN=GSTU20 PE=1 SV=1	0	3.851	6	1	2	1	1	217	25	5.78	6.88	1	0
High	Master Protein	Q8W593	Probable lactoylglutathione lyase, chloroplastic OS=Arabidopsis thaliana OX=3702 GN=At1g67280 PE=1 SV=1	0	3.84	4	1	2	1	1	350	39.1	7.37	6.2	1	0
High	Master Protein Rejected	P53496	Actin-11 OS=Arabidopsis thaliana OX=3702 GN=ACT11 PE=1 SV=1	0	3.83	7	2	4	0	0	377	41.6	5.39	5.16	2	0
High	Master Protein	Q9ZW18	Senescence-associated protein 13 OS=Arabidopsis thaliana OX=3702 GN=SAG13 PE=1 SV=1	0	3.812	6	1	1	1	1	269	28.8	5.9	3.68	1	0
High	Master Protein Candidate	P29516	Tubulin beta-8 chain OS=Arabidopsis thaliana OX=3702 GN=TUBB8 PE=2 SV=2	0	3.812	2	1	2	1	1	449	50.6	4.83	7.3	1	0
High	Master Protein Candidate	P29515	Tubulin beta-7 chain OS=Arabidopsis thaliana OX=3702 GN=TUBB7 PE=2 SV=1	0	3.812	2	1	2	1	1	449	50.7	4.83	7.3	1	0
High	Master Protein Candidate	P29513	Tubulin beta-5 chain OS=Arabidopsis thaliana OX=3702 GN=TUBB5 PE=2 SV=1	0	3.812	2	1	2	1	1	449	50.3	4.77	7.3	1	0
High	Master Protein Candidate	P24636	Tubulin beta-4 chain OS=Arabidopsis thaliana OX=3702 GN=TUBB4 PE=2 SV=2	0	3.812	2	1	2	1	1	444	49.8	4.86	7.3	1	0
High	Master Protein Candidate	P12411	Tubulin beta-1 chain OS=Arabidopsis thaliana OX=3702 GN=TUBB1 PE=2 SV=1	0	3.812	2	1	2	1	1	447	50.2	4.79	7.3	1	0
High	Master Protein Candidate	P29514	Tubulin beta-6 chain OS=Arabidopsis thaliana OX=3702 GN=TUBB6 PE=2 SV=1	0	3.812	2	1	2	1	1	449	50.6	4.82	7.3	1	0
High	Master Protein	Q56YW9	Tubulin beta-2 chain OS=Arabidopsis thaliana OX=3702 GN=TUBB2 PE=2 SV=2	0	3.812	2	1	2	1	1	450	50.7	4.81	7.3	1	0
High	Master Protein Candidate	P29517	Tubulin beta-9 chain OS=Arabidopsis thaliana OX=3702 GN=TUBB9 PE=1 SV=1	0	3.812	2	1	2	1	1	444	49.6	4.78	7.3	1	0
High	Master Protein	Q9LXA8	Probable beta-D-xylosidase 6 OS=Arabidopsis thaliana OX=3702 GN=BXL6 PE=2 SV=1	0.001	3.793	2	1	1	1	1	792	87.1	6.38	3.23	1	0
High	Master Protein	Q9ZVS5	Eukaryotic aspartyl protease family protein OS=Arabidopsis thaliana OX=3702 GN=At1g03230 PE=2 SV=1	0.001	3.784	3	1	2	1	1	434	46.1	9.14	6.62	1	0
High	Master Protein Candidate	Q9ZVS4	Eukaryotic aspartyl protease family protein OS=Arabidopsis thaliana OX=3702 GN=F15K9.17 PE=2 SV=1	0.001	3.784	3	1	2	1	1	433	45.7	8.66	6.62	1	0
High	Master Protein	O81153	Proteasome subunit beta type-3-B OS=Arabidopsis thaliana OX=3702 GN=PBC2 PE=1 SV=1	0.001	3.779	9	1	1	1	1	204	22.7	5.9	3.14	1	0
High	Master Protein Candidate	Q9XI05	Proteasome subunit beta type-3-A OS=Arabidopsis thaliana OX=3702 GN=PBC1 PE=1 SV=2	0.001	3.779	9	1	1	1	1	204	22.8	5.47	3.14	1	0
High	Master Protein Candidate	Q9SD68	Beta-D-glucan exohydrolase-like protein OS=Arabidopsis thaliana OX=3702 GN=F13I12.100 PE=4 SV=1	0.001	3.761	2	1	2	1	1	612	67.2	5.43	6.75	1	0
High	Master Protein	A0A1P8BG25	Glycosyl hydrolase family protein OS=Arabidopsis thaliana OX=3702 GN=At5g20950 PE=1 SV=1	0.001	3.761	1	1	2	1	1	702	77.1	9.32	6.75	1	0
High	Master Protein Candidate	Q8W112	Beta-D-glucan exohydrolase-like protein OS=Arabidopsis thaliana OX=3702 GN=At5g20950 PE=1 SV=1	0.001	3.761	2	1	2	1	1	624	67.9	9.13	6.75	1	0
High	Master Protein Candidate	Q9SD73	At3g47000 OS=Arabidopsis thaliana OX=3702 GN=F13I12.50 PE=1 SV=1	0.001	3.761	2	1	2	1	1	608	66.3	5.35	6.75	1	0
High	Master Protein Candidate	A0A1I9LR68	Glycosyl hydrolase family protein OS=Arabidopsis thaliana OX=3702 GN=At3g47000 PE=1 SV=1	0.001	3.761	2	1	2	1	1	449	49.2	6.4	6.75	1	0
High	Master Protein Candidate	F4JAB9	Glycosyl hydrolase family protein OS=Arabidopsis thaliana OX=3702 GN=At3g47050 PE=4 SV=2	0.001	3.761	3	1	2	1	1	389	42.9	7.42	6.75	1	0
High	Master Protein	Q9M9K1	Probable 2,3-bisphosphoglycerate-independent phosphoglycerate mutase 2 OS=Arabidopsis thaliana OX=3702 GN=At3g08590 PE=1 SV=1	0.001	3.759	2	1	1	1	1	560	60.7	5.85	2.18	1	0
High	Master Protein	A8MRQ5	Bifunctional inhibitor/lipid-transfer protein/seed storage 2S albumin superfamily protein OS=Arabidopsis thaliana OX=3702 GN=At4g22485 PE=4 SV=2	0.001	3.748	1	1	1	1	1	656	68.2	4.58	3.22	1	0
High	None	Q9STY6	40S ribosomal protein S20-2 OS=Arabidopsis thaliana OX=3702 GN=RPS20B PE=2 SV=1	0.001	3.742	10	1	2	1	1	122	13.7	9.72	5.7	1	0
High	Master Protein	Q9LT39	Leucine-rich repeat (LRR) family protein OS=Arabidopsis thaliana OX=3702 GN=At3g20820 PE=2 SV=1	0.001	3.741	3	1	2	1	1	365	39.8	8.41	6.59	1	0
High	Master Protein	Q9LR64	Photosystem II repair protein PSB27-H1, chloroplastic OS=Arabidopsis thaliana OX=3702 GN=PSB27-1 PE=1 SV=1	0.001	3.738	7	1	2	1	1	174	18.8	9.88	6.45	1	0
High	Master Protein	Q2HIQ2	At1g01170 OS=Arabidopsis thaliana OX=3702 GN=At1g01170 PE=2 SV=1	0.001	3.735	16	1	2	1	1	83	9.1	9.7	5.84	1	0
High	Master Protein Candidate	Q9SUI7	Photosystem I reaction center subunit VI-1, chloroplastic OS=Arabidopsis thaliana OX=3702 GN=PSAH1 PE=2 SV=1	0.001	3.728	8	1	2	1	1	145	15.2	9.95	7.23	1	0
High	Master Protein	Q9SUI6	Photosystem I reaction center subunit VI-2, chloroplastic OS=Arabidopsis thaliana OX=3702 GN=PSAH2 PE=2 SV=1	0.001	3.728	8	1	2	1	1	145	15.3	9.91	7.23	1	0
High	Master Protein Candidate	A0A1P8B3J3	Protein phosphatase 2C family protein OS=Arabidopsis thaliana OX=3702 GN=At4g28400 PE=4 SV=1	0.001	3.727	5	1	1	1	1	253	27.8	8.05	3.1	1	0
High	Master Protein Candidate	A0A1P8B3K8	Protein phosphatase 2C family protein OS=Arabidopsis thaliana OX=3702 GN=At4g28400 PE=4 SV=1	0.001	3.727	5	1	1	1	1	261	28.8	7.44	3.1	1	0
High	Master Protein	Q9SIU8	Probable protein phosphatase 2C 20 OS=Arabidopsis thaliana OX=3702 GN=PPC3-1.2 PE=1 SV=3	0.001	3.727	4	1	1	1	1	290	31.8	6.3	3.1	1	0
High	Master Protein Candidate	Q93YW5	Probable protein phosphatase 2C 58 OS=Arabidopsis thaliana OX=3702 GN=At4g28400 PE=2 SV=1	0.001	3.727	4	1	1	1	1	283	31	7.97	3.1	1	0
High	Master Protein	Q38842	AT0ZI1 protein OS=Arabidopsis thaliana OX=3702 GN=ATOZI1 PE=2 SV=1	0.001	3.708	16	1	2	1	1	80	8.6	8.87	5.94	1	0
High	Master Protein	Q9LE22	Probable calcium-binding protein CML27 OS=Arabidopsis thaliana OX=3702 GN=CML27 PE=1 SV=1	0.001	3.7	6	1	2	1	1	170	18.3	4.35	5.63	1	0
High	Master Protein	Q9SJ62	Protein WVD2-like 4 OS=Arabidopsis thaliana OX=3702 GN=WDL4 PE=1 SV=2	0.001	3.665	8	2	2	2	1	432	46.7	9.7	3.07	2	0
High	Master Protein	Q9C5M0	Mitochondrial dicarboxylate/tricarboxylate transporter DTC OS=Arabidopsis thaliana OX=3702 GN=DTC PE=1 SV=1	0.001	3.663	5	1	2	1	1	298	31.9	9.23	4.7	1	0
High	None	Q9FLF0	40S ribosomal protein S9-2 OS=Arabidopsis thaliana OX=3702 GN=RPS9C PE=1 SV=1	0.001	3.656	10	2	4	2	1	197	23.1	10.35	10.37	2	0
High	Master Protein Candidate	P0DH92	V-type proton ATPase subunit c1 OS=Arabidopsis thaliana OX=3702 GN=VHA-c1 PE=2 SV=1	0.001	3.65	11	1	2	1	1	164	16.6	8.46	4.92	1	0
High	Master Protein Candidate	A0A1P8B937	V-type proton ATPase proteolipid subunit OS=Arabidopsis thaliana OX=3702 GN=VHA-C3 PE=3 SV=1	0.001	3.65	13	1	2	1	1	138	13.9	9.38	4.92	1	0
High	Master Protein	F4HZ57	V-type proton ATPase proteolipid subunit OS=Arabidopsis thaliana OX=3702 GN=AVA-P4 PE=3 SV=1	0.001	3.65	9	1	2	1	1	200	20.5	7.84	4.92	1	0
High	Master Protein Candidate	P59229	V-type proton ATPase subunit c4 OS=Arabidopsis thaliana OX=3702 GN=VHA-c4 PE=1 SV=1	0.001	3.65	11	1	2	1	1	166	16.7	8.46	4.92	1	0
High	Master Protein Candidate	A0A1P8B7X4	V-type proton ATPase proteolipid subunit OS=Arabidopsis thaliana OX=3702 GN=AVA-P1 PE=3 SV=1	0.001	3.65	13	1	2	1	1	142	14.4	9.38	4.92	1	0
High	Master Protein Candidate	A0A1P8AQP0	V-type proton ATPase proteolipid subunit OS=Arabidopsis thaliana OX=3702 GN=AVA-P2 PE=3 SV=1	0.001	3.65	15	1	2	1	1	122	12.1	7.97	4.92	1	0
High	Master Protein Candidate	P59228	V-type proton ATPase subunit c2 OS=Arabidopsis thaliana OX=3702 GN=VHA-c2 PE=2 SV=1	0.001	3.65	11	1	2	1	1	165	16.6	8.46	4.92	1	0
High	Master Protein Candidate	Q9SI20	Elongation factor 1-delta 2 OS=Arabidopsis thaliana OX=3702 GN=At2g18110 PE=1 SV=1	0.001	3.613	8	2	3	2	1	231	25.3	4.6	3	2	0
High	Master Protein	A8MRC4	Translation elongation factor EF1B/ribosomal protein S6 family protein OS=Arabidopsis thaliana OX=3702 GN=eEF-1Bb1 PE=1 SV=1	0.001	3.613	7	2	3	2	1	260	28.8	4.74	3	2	0
High	Master Protein Candidate	P48006	Elongation factor 1-delta 1 OS=Arabidopsis thaliana OX=3702 GN=At1g30230 PE=1 SV=2	0.001	3.613	8	2	3	2	1	231	25.1	4.56	3	2	0
High	Master Protein	Q8LB10	ATP-dependent Clp protease proteolytic subunit-related protein 4, chloroplastic OS=Arabidopsis thaliana OX=3702 GN=CLPR4 PE=1 SV=1	0.001	3.601	4	1	1	1	1	305	33.4	9.31	2.22	1	0
High	Master Protein	Q96253	ATP synthase subunit epsilon, mitochondrial OS=Arabidopsis thaliana OX=3702 GN=At1g51650 PE=1 SV=3	0.001	3.593	37	2	2	2	1	70	7.8	9.29	2.05	2	0
High	Master Protein	F4KDA6	Protein LOW PSII ACCUMULATION 2, chloroplastic OS=Arabidopsis thaliana OX=3702 GN=LPA2 PE=1 SV=1	0.001	3.589	9	1	1	1	1	185	20.2	9.29	2.96	1	0
High	Master Protein	P93017	Dormancy-associated protein homolog 1 OS=Arabidopsis thaliana OX=3702 GN=DRMH1 PE=1 SV=1	0.001	3.583	18	1	1	1	1	108	11.6	9.7	3.22	1	0
High	Master Protein	Q9SGA6	40S ribosomal protein S19-1 OS=Arabidopsis thaliana OX=3702 GN=RPS19A PE=2 SV=1	0.001	3.58	8	1	1	1	1	143	15.8	10.08	2.54	1	0
High	Master Protein	Q9C9W5	Glycerate dehydrogenase HPR, peroxisomal OS=Arabidopsis thaliana OX=3702 GN=HPR PE=1 SV=1	0.001	3.569	5	1	2	1	1	386	42.2	7.15	8.11	1	0
High	Master Protein Candidate	A0A1P8ANC0	Hydroxypyruvate reductase OS=Arabidopsis thaliana OX=3702 GN=HPR PE=3 SV=1	0.001	3.569	6	1	2	1	1	360	39.7	8.03	8.11	1	0
High	Master Protein Candidate	Q9M8X9	40S ribosomal protein S16-2 OS=Arabidopsis thaliana OX=3702 GN=RPS16B PE=1 SV=1	0.001	3.565	7	1	2	1	1	146	16.6	10.18	5.97	1	0
High	Master Protein Candidate	A8MRX2	Ribosomal protein S5 domain 2-like superfamily protein OS=Arabidopsis thaliana OX=3702 GN=At5g18380 PE=3 SV=1	0.001	3.565	7	1	2	1	1	144	16.5	9.76	5.97	1	0
High	Master Protein Candidate	F4JWM1	Ribosomal protein S5 domain 2-like superfamily protein OS=Arabidopsis thaliana OX=3702 GN=At5g18380 PE=3 SV=1	0.001	3.565	7	1	2	1	1	139	16	9.86	5.97	1	0
High	Master Protein	Q42340	40S ribosomal protein S16-3 OS=Arabidopsis thaliana OX=3702 GN=RPS16C PE=2 SV=1	0.001	3.565	7	1	2	1	1	146	16.6	10.2	5.97	1	0
High	Master Protein	Q56YA5	Serine--glyoxylate aminotransferase OS=Arabidopsis thaliana OX=3702 GN=AGT1 PE=1 SV=2	0.001	3.562	4	1	1	1	1	401	44.2	7.83	3.12	1	0
High	Master Protein	Q9SR73	40S ribosomal protein S28-1 OS=Arabidopsis thaliana OX=3702 GN=RPS28A PE=3 SV=1	0.001	3.532	19	1	2	1	1	64	7.4	10.83	6.87	1	0
High	Master Protein	O64903	Nucleoside diphosphate kinase II, chloroplastic OS=Arabidopsis thaliana OX=3702 GN=NDPK2 PE=1 SV=2	0.001	3.531	5	1	2	1	1	231	25.5	8.95	6.07	1	0
High	Master Protein Candidate	Q9SAE4	Cytochrome P450 71B29 OS=Arabidopsis thaliana OX=3702 GN=CYP71B29 PE=3 SV=1	0.001	3.526	3	1	2	1	1	490	56	7.99	7.95	1	0
High	Master Protein Candidate	Q9LTM0	Cytochrome P450 71B23 OS=Arabidopsis thaliana OX=3702 GN=CYP71B23 PE=2 SV=1	0.001	3.526	3	1	2	1	1	501	56.9	6.74	7.95	1	0
High	Master Protein	Q96514	Cytochrome P450 71B7 OS=Arabidopsis thaliana OX=3702 GN=CYP71B7 PE=1 SV=1	0.001	3.526	3	1	2	1	1	504	57.2	8.22	7.95	1	0
High	Master Protein Candidate	Q9ZU07	Cytochrome P450 71B12 OS=Arabidopsis thaliana OX=3702 GN=CYP71B12 PE=2 SV=1	0.001	3.526	3	1	2	1	1	496	56.7	9.04	7.95	1	0
High	Master Protein Candidate	P58050	Cytochrome P450 71B13 OS=Arabidopsis thaliana OX=3702 GN=CYP71B13 PE=2 SV=1	0.001	3.526	3	1	2	1	1	496	56.4	8.62	7.95	1	0
High	Master Protein Candidate	Q9SAE3	Cytochrome P450 71B28 OS=Arabidopsis thaliana OX=3702 GN=CYP71B28 PE=2 SV=1	0.001	3.526	3	1	2	1	1	490	56.5	7.03	7.95	1	0
High	Master Protein	Q56ZQ3	Vacuolar-sorting receptor 4 OS=Arabidopsis thaliana OX=3702 GN=VSR4 PE=2 SV=2	0.001	3.515	3	1	1	1	1	628	69.8	5.48	2.4	1	0
High	Master Protein	Q8LE52	Glutathione S-transferase DHAR3, chloroplastic OS=Arabidopsis thaliana OX=3702 GN=DHAR3 PE=1 SV=1	0.001	3.501	4	1	2	1	1	258	28.5	7.74	6.71	1	0
High	Master Protein	Q944I4	D-glycerate 3-kinase, chloroplastic OS=Arabidopsis thaliana OX=3702 GN=GLYK PE=1 SV=2	0.001	3.478	2	1	2	1	1	456	51	7.14	4.95	1	0
High	Master Protein Candidate	A0A1P8AMB3	p-loop containing nucleoside triphosphate hydrolases superfamily protein OS=Arabidopsis thaliana OX=3702 GN=At1g80380 PE=4 SV=1	0.001	3.478	3	1	2	1	1	390	44	5.8	4.95	1	0
High	Master Protein Candidate	A0A1P8AMB5	p-loop containing nucleoside triphosphate hydrolases superfamily protein OS=Arabidopsis thaliana OX=3702 GN=At1g80380 PE=4 SV=1	0.001	3.478	3	1	2	1	1	323	36.3	6.57	4.95	1	0
High	Master Protein Candidate	F4HS63	p-loop containing nucleoside triphosphate hydrolases superfamily protein OS=Arabidopsis thaliana OX=3702 GN=At1g80380 PE=4 SV=1	0.001	3.478	2	1	2	1	1	450	50.2	6.73	4.95	1	0
High	Master Protein Candidate	C0Z2X8	AT1G80380 protein OS=Arabidopsis thaliana OX=3702 GN=At1g80380 PE=2 SV=1	0.001	3.478	3	1	2	1	1	325	36.8	8.5	4.95	1	0
High	Master Protein	O82204	60S ribosomal protein L28-1 OS=Arabidopsis thaliana OX=3702 GN=RPL28A PE=1 SV=1	0.001	3.465	11	1	2	1	1	143	15.9	10.58	4.9	1	0
High	None	P29197	Chaperonin CPN60, mitochondrial OS=Arabidopsis thaliana OX=3702 GN=CPN60 PE=1 SV=2	0.001	3.459	2	1	2	1	1	577	61.2	5.78	6.57	1	0
High	None	F4JPD8	Nucleoside diphosphate kinase OS=Arabidopsis thaliana OX=3702 GN=At4g23895 PE=3 SV=1	0.001	3.449	6	2	5	2	1	467	52	6.24	7.16	2	0
High	None	Q8LAH8	Nucleoside diphosphate kinase IV, chloroplastic/mitochondrial OS=Arabidopsis thaliana OX=3702 GN=NDK4 PE=1 SV=2	0.001	3.449	12	2	5	2	1	237	25.8	9.41	7.16	2	0
High	Master Protein Candidate	Q2V3Q0	Proteasome subunit alpha type OS=Arabidopsis thaliana OX=3702 GN=PAD1 PE=3 SV=1	0.001	3.448	6	1	1	1	1	243	26.6	7.37	3.91	1	0
High	Master Protein Candidate	P30186	Proteasome subunit alpha type-7-A OS=Arabidopsis thaliana OX=3702 GN=PAD1 PE=1 SV=1	0.001	3.448	6	1	1	1	1	250	27.3	7.37	3.91	1	0
High	Master Protein	O24616	Proteasome subunit alpha type-7-B OS=Arabidopsis thaliana OX=3702 GN=PAD2 PE=1 SV=2	0.001	3.448	6	1	1	1	1	250	27.3	8.63	3.91	1	0
High	None	F4JUC2	Cytochrome b-c1 complex subunit 7 OS=Arabidopsis thaliana OX=3702 GN=At4g32470 PE=1 SV=1	0.001	3.444	23	2	4	2	1	101	12	9.82	4.96	2	0
High	Master Protein Candidate	F4JEN1	CTC-interacting domain 4 OS=Arabidopsis thaliana OX=3702 GN=CID4 PE=4 SV=1	0.001	3.437	3	1	2	1	1	549	60.2	6.7	5.41	1	0
High	Master Protein Candidate	Q94AM9	Polyadenylate-binding protein-interacting protein 4 OS=Arabidopsis thaliana OX=3702 GN=CID4 PE=2 SV=1	0.001	3.437	3	1	2	1	1	595	65.7	6.92	5.41	1	0
High	Master Protein	A0A1I9LLC0	CTC-interacting domain 4 OS=Arabidopsis thaliana OX=3702 GN=CID4 PE=4 SV=1	0.001	3.437	2	1	2	1	1	603	66.5	6.92	5.41	1	0
High	Master Protein	Q9FR37	Amidase 1 OS=Arabidopsis thaliana OX=3702 GN=AMI1 PE=1 SV=1	0.001	3.429	3	1	1	1	1	425	45	6.27	3.04	1	0
High	Master Protein	P41088	Chalcone--flavonone isomerase 1 OS=Arabidopsis thaliana OX=3702 GN=CHI1 PE=1 SV=2	0.001	3.391	5	1	1	1	1	246	26.6	5.5	3.29	1	0
High	Master Protein Candidate	Q9LF30	40S ribosomal protein S19-2 OS=Arabidopsis thaliana OX=3702 GN=RPS19B PE=2 SV=1	0.001	3.391	8	1	2	1	1	143	15.8	10.14	5.55	1	0
High	Master Protein	Q9FNP8	40S ribosomal protein S19-3 OS=Arabidopsis thaliana OX=3702 GN=RPS19C PE=2 SV=1	0.001	3.391	8	1	2	1	1	143	15.7	10.21	5.55	1	0
High	Master Protein	Q8VZH2	Aminopeptidase M1 OS=Arabidopsis thaliana OX=3702 GN=APM1 PE=1 SV=1	0.001	3.384	2	1	1	1	1	879	98.1	5.5	2.96	1	0
High	Master Protein	Q8L4N1	Universal stress protein PHOS34 OS=Arabidopsis thaliana OX=3702 GN=PHOS34 PE=1 SV=1	0.001	3.382	7	1	1	1	1	260	28.1	6.25	2.35	1	0
High	None	Q8VYL3	Aspartic proteinase A2 OS=Arabidopsis thaliana OX=3702 GN=APA2 PE=2 SV=1	0.001	3.373	2	1	2	1	1	513	55.7	6.34	3.94	1	0
High	None	A0A1P8AVA7	Saposin-like aspartyl protease family protein OS=Arabidopsis thaliana OX=3702 GN=At1g62290 PE=3 SV=1	0.001	3.373	2	1	2	1	1	486	52.7	6.95	3.94	1	0
High	None	F4IT14	HARMLESS TO OZONE LAYER 1 OS=Arabidopsis thaliana OX=3702 GN=HOL1 PE=4 SV=1	0.001	3.313	9	1	2	1	1	163	18.5	4.78	0	1	0
High	Master Protein	Q9FIJ5	AT5g47860/MCA23_20 OS=Arabidopsis thaliana OX=3702 GN=MCA23.20 PE=2 SV=1	0.001	3.299	3	1	3	1	1	431	47.8	8.06	6.25	1	0
High	None	Q9FIF3	40S ribosomal protein S8-2 OS=Arabidopsis thaliana OX=3702 GN=RPS8B PE=2 SV=1	0.001	3.271	6	1	1	1	1	210	23.8	10.49	3.17	1	0
High	Master Protein Rejected	Q9LT85	Leucine-rich repeat (LRR) family protein OS=Arabidopsis thaliana OX=3702 GN=At3g19320 PE=4 SV=1	0.001	3.246	2	1	2	0	0	493	54.9	8.13	6.21	1	0
High	Master Protein	P31265	Translationally-controlled tumor protein 1 OS=Arabidopsis thaliana OX=3702 GN=TCTP1 PE=1 SV=2	0.001	3.244	5	1	2	1	1	168	18.9	4.64	5.27	1	0
High	None	A0A1P8B6N4	Adenine phosphoribosyl transferase 3 OS=Arabidopsis thaliana OX=3702 GN=APT3 PE=4 SV=1	0.001	3.244	14	1	2	1	1	105	11.8	9.61	5.41	1	0
High	None	A0A1P8AN73	Adenine phosphoribosyl transferase 2 OS=Arabidopsis thaliana OX=3702 GN=APT2 PE=3 SV=1	0.001	3.244	9	1	2	1	1	160	17.5	5.38	5.41	1	0
High	None	Q42563	Adenine phosphoribosyltransferase 2 OS=Arabidopsis thaliana OX=3702 GN=APT2 PE=1 SV=1	0.001	3.244	8	1	2	1	1	192	21	5.95	5.41	1	0
High	None	Q9SUW2	Adenine phosphoribosyltransferase 3 OS=Arabidopsis thaliana OX=3702 GN=APT3 PE=1 SV=1	0.001	3.244	8	1	2	1	1	183	20.3	6.09	5.41	1	0
High	Master Protein Candidate	Q0WLB5	Clathrin heavy chain 2 OS=Arabidopsis thaliana OX=3702 GN=CHC2 PE=1 SV=1	0.001	3.225	1	1	1	1	1	1703	193.1	5.38	3.22	1	0
High	Master Protein	Q0WNJ6	Clathrin heavy chain 1 OS=Arabidopsis thaliana OX=3702 GN=CHC1 PE=1 SV=1	0.001	3.225	1	1	1	1	1	1705	193.1	5.4	3.22	1	0
High	Master Protein	Q9LYR4	Aldolase-type TIM barrel family protein OS=Arabidopsis thaliana OX=3702 GN=TRA2 PE=2 SV=1	0.001	3.217	3	1	1	1	1	438	47.7	6.43	3.23	1	0
High	Master Protein Candidate	A0A1P8AQS2	Pyruvate dehydrogenase E1 component subunit alpha OS=Arabidopsis thaliana OX=3702 GN=E1 ALPHA PE=1 SV=1	0.001	3.217	4	1	1	1	1	378	41.9	7.3	3.59	1	0
High	Master Protein	P52901	Pyruvate dehydrogenase E1 component subunit alpha-1, mitochondrial OS=Arabidopsis thaliana OX=3702 GN=E1 ALPHA PE=1 SV=2	0.001	3.217	4	1	1	1	1	389	43	7.49	3.59	1	0
High	Master Protein	Q9SIW5	40S ribosomal protein S25-1 OS=Arabidopsis thaliana OX=3702 GN=RPS25A PE=3 SV=3	0.001	3.216	9	1	2	1	1	109	12.1	10.58	5.12	1	0
High	Master Protein Candidate	F4IHJ8	Ribosomal protein S25 family protein OS=Arabidopsis thaliana OX=3702 GN=At2g21580 PE=4 SV=1	0.001	3.216	9	1	2	1	1	107	11.9	10.68	5.12	1	0
High	Master Protein Candidate	Q9T029	40S ribosomal protein S25-4 OS=Arabidopsis thaliana OX=3702 GN=RPS25E PE=3 SV=1	0.001	3.216	9	1	2	1	1	108	12	10.7	5.12	1	0
High	Master Protein Candidate	B3H4B6	Ribosomal protein S25 family protein OS=Arabidopsis thaliana OX=3702 GN=At4g39200 PE=4 SV=1	0.001	3.216	9	1	2	1	1	107	11.9	10.68	5.12	1	0
High	Master Protein Candidate	Q9SIK2	40S ribosomal protein S25-2 OS=Arabidopsis thaliana OX=3702 GN=RPS25B PE=3 SV=1	0.001	3.216	9	1	2	1	1	108	12.1	10.7	5.12	1	0
High	Master Protein Candidate	Q8GYL5	40S ribosomal protein S25-3 OS=Arabidopsis thaliana OX=3702 GN=RPS25D PE=3 SV=2	0.001	3.216	9	1	2	1	1	108	12	10.7	5.12	1	0
High	Master Protein	Q945Q5	At2g30700/T11J7.9 OS=Arabidopsis thaliana OX=3702 GN=At2g30695 PE=2 SV=1	0.001	3.209	6	1	2	1	1	199	22.2	6.79	5.07	1	0
High	None	F4IP53	General regulatory factor 9 OS=Arabidopsis thaliana OX=3702 GN=GRF9 PE=3 SV=1	0.001	3.18	4	1	2	0	6	262	29.4	4.91	5.53	1	0
High	None	F4IP55	General regulatory factor 9 OS=Arabidopsis thaliana OX=3702 GN=GRF9 PE=1 SV=1	0.001	3.18	4	1	2	0	6	276	30.9	5.03	5.53	1	0
High	None	Q9S9Z8	14-3-3-like protein GF14 omicron OS=Arabidopsis thaliana OX=3702 GN=GRF11 PE=2 SV=2	0.001	3.18	4	1	2	0	6	252	28.8	5.01	5.53	1	0
High	None	Q9C5W6	14-3-3-like protein GF14 iota OS=Arabidopsis thaliana OX=3702 GN=GRF12 PE=2 SV=1	0.001	3.18	4	1	2	0	6	268	30.5	4.88	5.53	1	0
High	None	Q96299	14-3-3-like protein GF14 mu OS=Arabidopsis thaliana OX=3702 GN=GRF9 PE=1 SV=2	0.001	3.18	4	1	2	0	6	263	29.5	4.91	5.53	1	0
High	None	Q9FMD9	Glutamine synthetase cytosolic isozyme 1-4 OS=Arabidopsis thaliana OX=3702 GN=GLN1-4 PE=1 SV=1	0.001	3.171	4	1	2	1	1	356	39	5.29	1.62	1	0
High	None	A0A1P8BF22	Glutamine synthetase 14 OS=Arabidopsis thaliana OX=3702 GN=GLN1:4 PE=3 SV=1	0.001	3.171	6	1	2	1	1	249	27.2	4.84	1.62	1	0
High	None	A0A1P8BCJ5	Regulatory particle triple-A ATPase 6A OS=Arabidopsis thaliana OX=3702 GN=RPT6A PE=3 SV=1	0.001	3.154	3	1	2	0	2	361	40.7	8.29	5.53	1	0
High	None	Q9T090	26S proteasome regulatory particle chain RPT6-like protein OS=Arabidopsis thaliana OX=3702 GN=At4g27680 PE=2 SV=1	0.001	3.154	3	1	2	0	2	398	44.2	6.16	5.53	1	0
High	None	Q9C5U3	26S proteasome regulatory subunit 8 homolog A OS=Arabidopsis thaliana OX=3702 GN=RPT6A PE=1 SV=1	0.001	3.154	3	1	2	0	2	419	47.2	8.88	5.53	1	0
High	None	Q9SEI4	26S proteasome regulatory subunit 6B homolog OS=Arabidopsis thaliana OX=3702 GN=RPT3 PE=1 SV=1	0.001	3.154	3	1	2	0	2	408	45.7	5.6	5.53	1	0
High	None	Q9FJC9	26S proteasome regulatory particle chain RPT6-like protein OS=Arabidopsis thaliana OX=3702 GN=MNC6.8 PE=2 SV=1	0.001	3.154	3	1	2	0	2	403	44.8	5.9	5.53	1	0
High	None	Q94BQ2	26S proteasome regulatory subunit 8 homolog B OS=Arabidopsis thaliana OX=3702 GN=RPT6B PE=1 SV=1	0.001	3.154	3	1	2	0	2	419	47.1	8.59	5.53	1	0
High	Master Protein	P42798	40S ribosomal protein S15a-1 OS=Arabidopsis thaliana OX=3702 GN=RPS15AA PE=2 SV=2	0.001	3.154	7	1	2	1	1	130	14.8	9.89	4.54	1	0
High	Master Protein	Q8LDU4	Red chlorophyll catabolite reductase, chloroplastic OS=Arabidopsis thaliana OX=3702 GN=RCCR PE=1 SV=2	0.001	3.154	4	1	1	1	1	319	36.4	6.04	3.05	1	0
High	Master Protein	Q8VYW6	Glutathione hydrolase 1 OS=Arabidopsis thaliana OX=3702 GN=GGT1 PE=2 SV=1	0.001	3.153	2	1	1	1	1	572	61.2	9.51	2.6	1	0
High	Master Protein	Q9C7N5	GDSL esterase/lipase At1g29660 OS=Arabidopsis thaliana OX=3702 GN=At1g29660 PE=1 SV=1	0.001	3.151	4	1	1	1	1	364	40.1	5.36	3.62	1	0
High	Master Protein	Q9SZ30	Imidazole glycerol phosphate synthase hisHF, chloroplastic OS=Arabidopsis thaliana OX=3702 GN=HISN4 PE=2 SV=1	0.001	3.142	3	1	1	1	1	592	64.2	6.76	3.02	1	0
High	Master Protein	Q9SL05	Protein PROTON GRADIENT REGULATION 5, chloroplastic OS=Arabidopsis thaliana OX=3702 GN=PGR5 PE=1 SV=1	0.001	3.131	8	1	2	1	1	133	14.3	10.65	6.09	1	0
High	Master Protein	Q42589	Non-specific lipid-transfer protein 1 OS=Arabidopsis thaliana OX=3702 GN=LTP1 PE=2 SV=1	0.001	3.115	8	1	2	1	1	118	11.7	8.95	4.82	1	0
High	Master Protein	Q94K71	CBBY-like protein OS=Arabidopsis thaliana OX=3702 GN=CBBY PE=1 SV=1	0.001	3.108	3	1	2	1	1	319	34.2	8.06	4.44	1	0
High	Master Protein	Q9ZRA2	Homogentisate 1,2-dioxygenase OS=Arabidopsis thaliana OX=3702 GN=HGO PE=2 SV=2	0.001	3.106	3	1	1	1	1	461	51.4	6.18	0	1	0
High	Master Protein	Q8H103	Glucose-6-phosphate isomerase 1, chloroplastic OS=Arabidopsis thaliana OX=3702 GN=PGI1 PE=1 SV=1	0.001	3.1	3	1	1	1	1	613	67	5.69	3.02	1	0
High	Master Protein	Q9SCL7	Acetylglutamate kinase, chloroplastic OS=Arabidopsis thaliana OX=3702 GN=NAGK PE=1 SV=1	0.001	3.098	10	2	2	2	1	347	36.6	8.92	3.02	2	0
High	None	Q9C9Z8	V-type proton ATPase subunit E2 OS=Arabidopsis thaliana OX=3702 GN=VHA-E2 PE=2 SV=1	0.001	3.086	4	1	2	1	1	235	26.8	9.13	5.62	1	0
High	Master Protein	P61841	30S ribosomal protein S7, chloroplastic OS=Arabidopsis thaliana OX=3702 GN=rps7-A PE=1 SV=1	0.001	3.08	6	1	2	1	1	155	17.3	11.28	5.94	1	0
High	Master Protein	Q93WL3	ATP-dependent Clp protease ATP-binding subunit CLPT1, chloroplastic OS=Arabidopsis thaliana OX=3702 GN=CLPT1 PE=1 SV=1	0.001	3.073	10	1	1	1	1	238	26	9.19	3.49	1	0
High	Master Protein	P25855	Glycine cleavage system H protein 1, mitochondrial OS=Arabidopsis thaliana OX=3702 GN=GDH1 PE=1 SV=1	0.001	3.067	10	1	1	1	1	165	17.9	5.34	3.59	1	0
High	Master Protein	Q9SK22	40S ribosomal protein S16-1 OS=Arabidopsis thaliana OX=3702 GN=RPS16A PE=2 SV=1	0.001	3.054	7	1	2	1	1	146	16.6	10.2	4.6	1	0
High	None	F4IL53	Thioredoxin family protein OS=Arabidopsis thaliana OX=3702 GN=UNE5 PE=3 SV=1	0.001	3.053	4	1	2	1	1	266	29.2	5.76	6.33	1	0
High	None	Q9FIW4	Beta-glucosidase 42 OS=Arabidopsis thaliana OX=3702 GN=BGLU42 PE=2 SV=1	0.001	3.043	3	2	3	2	1	490	56	5.63	5.53	2	0
High	Master Protein	Q9XEX2	Peroxiredoxin-2B OS=Arabidopsis thaliana OX=3702 GN=PRXIIB PE=1 SV=1	0.001	3.028	6	1	1	1	1	162	17.4	5.36	2.44	1	0
High	None	Q66GI2	Dirigent protein 22 OS=Arabidopsis thaliana OX=3702 GN=DIR22 PE=2 SV=1	0.001	3.02	10	1	2	1	1	125	13.6	9.33	6.61	1	0
High	Master Protein Candidate	A8MR50	Ribosomal protein L34e superfamily protein OS=Arabidopsis thaliana OX=3702 GN=At1g26880 PE=4 SV=1	0.001	2.988	13	1	2	1	1	96	11	11.84	5.41	1	0
High	Master Protein Candidate	Q9FE65	60S ribosomal protein L34-2 OS=Arabidopsis thaliana OX=3702 GN=RPL34B PE=3 SV=1	0.001	2.988	10	1	2	1	1	119	13.6	11.59	5.41	1	0
High	Master Protein	Q42351	60S ribosomal protein L34-1 OS=Arabidopsis thaliana OX=3702 GN=RPL34A PE=2 SV=1	0.001	2.988	10	1	2	1	1	120	13.7	11.59	5.41	1	0
High	Master Protein	Q9SU93	Nucleophosmin OS=Arabidopsis thaliana OX=3702 GN=At4g29520 PE=4 SV=1	0.001	2.976	5	1	1	1	1	306	34.3	7.83	2.11	1	0
High	None	Q9LFF6	Histone H2B.8 OS=Arabidopsis thaliana OX=3702 GN=At3g53650 PE=1 SV=3	0.001	2.961	11	1	2	1	1	138	15.2	10.08	7.24	1	0
High	Master Protein	Q9SLA8	Enoyl-[acyl-carrier-protein] reductase [NADH], chloroplastic OS=Arabidopsis thaliana OX=3702 GN=MOD1 PE=1 SV=1	0.001	2.933	3	1	2	1	1	390	41.2	9	5.2	1	0
High	Master Protein	P25818	Aquaporin TIP1-1 OS=Arabidopsis thaliana OX=3702 GN=TIP1-1 PE=1 SV=1	0.001	2.909	7	1	2	1	1	251	25.6	6.51	4.2	1	0
High	Master Protein	P51414	60S ribosomal protein L26-1 OS=Arabidopsis thaliana OX=3702 GN=RPL26A PE=2 SV=2	0.001	2.901	10	1	2	1	1	146	16.9	10.78	0	1	0
High	Master Protein Candidate	Q9FH82	Pectin acetylesterase 11 OS=Arabidopsis thaliana OX=3702 GN=PAE11 PE=2 SV=1	0.001	2.893	3	1	2	1	1	391	42	8.66	5.97	1	0
High	Master Protein	F4JT64	Pectin acetylesterase OS=Arabidopsis thaliana OX=3702 GN=PAE7 PE=3 SV=1	0.001	2.893	2	1	2	1	1	517	55.8	9.04	5.97	1	0
High	Master Protein Candidate	Q940J8	Pectin acetylesterase 7 OS=Arabidopsis thaliana OX=3702 GN=PAE7 PE=2 SV=1	0.001	2.893	3	1	2	1	1	391	42.1	9.11	5.97	1	0
High	Master Protein	Q9LR75	Coproporphyrinogen-III oxidase 1, chloroplastic OS=Arabidopsis thaliana OX=3702 GN=CPX1 PE=2 SV=1	0.001	2.883	3	1	1	1	1	386	43.8	6.7	3.16	1	0
High	Master Protein Candidate	A0A1I9LQ22	Cyclophilin-like peptidyl-prolyl cis-trans isomerase family protein OS=Arabidopsis thaliana OX=3702 GN=At3g15520 PE=4 SV=1	0.001	2.871	4	1	1	1	1	366	39.5	9	2.27	1	0
High	Master Protein Candidate	A0A1I9LQ23	Cyclophilin-like peptidyl-prolyl cis-trans isomerase family protein OS=Arabidopsis thaliana OX=3702 GN=At3g15520 PE=4 SV=1	0.001	2.871	4	1	1	1	1	326	35	5.01	2.27	1	0
High	Master Protein	P82869	Peptidyl-prolyl cis-trans isomerase CYP37, chloroplastic OS=Arabidopsis thaliana OX=3702 GN=CYP37 PE=1 SV=3	0.001	2.871	3	1	1	1	1	466	50.5	7.06	2.27	1	0
High	Master Protein	Q8LDL0	Protein HHL1, chloroplastic OS=Arabidopsis thaliana OX=3702 GN=HHL1 PE=1 SV=1	0.001	2.864	8	1	1	1	1	231	26.1	9.57	2.2	1	0
High	None	F4IHK9	Cold, circadian rhythm, and rna binding 2 OS=Arabidopsis thaliana OX=3702 GN=GRP7 PE=1 SV=1	0.001	2.83	7	1	1	1	1	159	15.5	5.6	3	1	0
High	None	Q03250	Glycine-rich RNA-binding protein 7 OS=Arabidopsis thaliana OX=3702 GN=RBG7 PE=1 SV=1	0.001	2.83	6	1	1	1	1	176	16.9	6.15	3	1	0
High	Master Protein	Q9LEX1	At3g61050 OS=Arabidopsis thaliana OX=3702 GN=T27I15_140 PE=1 SV=1	0.001	2.814	4	1	2	1	1	510	55.1	8.21	0	1	0
High	Master Protein	Q8L7S9	Thioredoxin Y2, chloroplastic OS=Arabidopsis thaliana OX=3702 GN=At1g43560 PE=2 SV=1	0.001	2.809	8	1	1	1	1	167	18.6	8.27	3.01	1	0
High	Master Protein Candidate	Q9SG91	At3g10860 OS=Arabidopsis thaliana OX=3702 GN=T7M13.6 PE=2 SV=1	0.001	2.77	17	1	2	1	1	72	8.5	9.48	6.35	1	0
High	Master Protein	Q9FLB7	At5g05370 OS=Arabidopsis thaliana OX=3702 GN=At5g05370 PE=2 SV=1	0.001	2.77	17	1	2	1	1	72	8.4	9.48	6.35	1	0
High	Master Protein	P56801	30S ribosomal protein S8, chloroplastic OS=Arabidopsis thaliana OX=3702 GN=rps8 PE=3 SV=1	0.001	2.764	9	1	1	1	1	134	15.5	10.93	3.31	1	0
High	Master Protein	Q9SYL9	50S ribosomal protein L13, chloroplastic OS=Arabidopsis thaliana OX=3702 GN=RPL13 PE=2 SV=1	0.001	2.763	4	1	1	1	1	241	26.8	9.92	0	1	0
High	Master Protein	Q9SYE2	At1g51400/F5D21_10 OS=Arabidopsis thaliana OX=3702 GN=F11M15.26 PE=2 SV=1	0.001	2.755	11	1	2	1	1	106	11.4	9.77	5.56	1	0
High	Master Protein Candidate	Q9FJE8	Probable histone H2A.7 OS=Arabidopsis thaliana OX=3702 GN=At5g59870 PE=1 SV=1	0.001	2.749	6	1	2	1	1	150	16	10.55	4.98	1	0
High	Master Protein Candidate	O04848	Probable histone H2AXa OS=Arabidopsis thaliana OX=3702 GN=At1g08880 PE=1 SV=1	0.001	2.749	6	1	2	1	1	142	14.8	10.32	4.98	1	0
High	Master Protein Candidate	Q9C944	Probable histone H2A variant 3 OS=Arabidopsis thaliana OX=3702 GN=At1g52740 PE=1 SV=1	0.001	2.749	7	1	2	1	1	134	14.3	10.29	4.98	1	0
High	Master Protein	Q8LDV3	Uncharacterized protein At4g13200, chloroplastic OS=Arabidopsis thaliana OX=3702 GN=At4g13200 PE=1 SV=2	0.001	2.749	5	1	2	1	1	185	20.4	5.3	4.41	1	0
High	Master Protein Candidate	Q9LHQ5	Probable histone H2A.2 OS=Arabidopsis thaliana OX=3702 GN=At3g20670 PE=1 SV=1	0.001	2.749	7	1	2	1	1	132	13.8	10.15	4.98	1	0
High	Master Protein Candidate	Q9S9K7	Probable histone H2AXb OS=Arabidopsis thaliana OX=3702 GN=At1g54690 PE=1 SV=1	0.001	2.749	6	1	2	1	1	142	14.8	10.32	4.98	1	0
High	Master Protein Candidate	O23628	Histone H2A variant 1 OS=Arabidopsis thaliana OX=3702 GN=H2AV PE=1 SV=1	0.001	2.749	7	1	2	1	1	136	14.5	10.32	4.98	1	0
High	Master Protein Candidate	Q9LD28	Histone H2A.6 OS=Arabidopsis thaliana OX=3702 GN=RAT5 PE=1 SV=1	0.001	2.749	7	1	2	1	1	130	13.6	10.15	4.98	1	0
High	Master Protein Candidate	O81826	Probable histone H2A.3 OS=Arabidopsis thaliana OX=3702 GN=At4g27230 PE=1 SV=1	0.001	2.749	7	1	2	1	1	131	13.8	10.05	4.98	1	0
High	Master Protein Candidate	Q9SII0	Probable histone H2A variant 2 OS=Arabidopsis thaliana OX=3702 GN=At2g38810 PE=2 SV=1	0.001	2.749	7	1	2	1	1	136	14.4	10.48	4.98	1	0
High	Master Protein	Q94F49	Probable histone H2A.5 OS=Arabidopsis thaliana OX=3702 GN=At5g27670 PE=1 SV=1	0.001	2.749	6	1	2	1	1	150	15.9	10.46	4.98	1	0
High	Master Protein Candidate	Q9C681	Probable histone H2A.1 OS=Arabidopsis thaliana OX=3702 GN=At1g51060 PE=1 SV=1	0.001	2.749	7	1	2	1	1	132	13.9	10.1	4.98	1	0
High	Master Protein Candidate	A0A2H1ZEB8	Ribosomal protein L16p/L10e family protein OS=Arabidopsis thaliana OX=3702 GN=SAC52 PE=4 SV=1	0.001	2.732	10	1	1	1	1	126	14.4	10.05	2.64	1	0
High	Master Protein Candidate	A0A1P8AUU3	Ribosomal protein L16p/L10e family protein OS=Arabidopsis thaliana OX=3702 GN=RPL10B PE=4 SV=1	0.001	2.732	7	1	1	1	1	184	20.5	10.35	2.64	1	0
High	Master Protein Candidate	Q93W22	60S ribosomal protein L10-3 OS=Arabidopsis thaliana OX=3702 GN=RPL10C PE=2 SV=1	0.001	2.732	5	1	1	1	1	221	24.9	10.56	2.64	1	0
High	Master Protein Candidate	Q93VT9	60S ribosomal protein L10-1 OS=Arabidopsis thaliana OX=3702 GN=RPL10A PE=1 SV=1	0.001	2.732	5	1	1	1	1	220	24.9	10.49	2.64	1	0
High	Master Protein	Q08770	60S ribosomal protein L10-2 OS=Arabidopsis thaliana OX=3702 GN=RPL10B PE=2 SV=2	0.001	2.732	5	1	1	1	1	221	24.9	10.43	2.64	1	0
High	None	B3H4Y9	CYTOCHROME C-1 OS=Arabidopsis thaliana OX=3702 GN=CYTC-1 PE=1 SV=1	0.001	2.731	11	1	1	1	1	102	11.1	8.87	1.88	1	0
High	Master Protein	Q9LHA7	Peroxidase 31 OS=Arabidopsis thaliana OX=3702 GN=PER31 PE=2 SV=1	0.001	2.729	5	1	2	1	1	316	35.3	9.06	5.12	1	0
High	Master Protein	Q9ZUC1	NADPH-dependent alkenal/one oxidoreductase, chloroplastic OS=Arabidopsis thaliana OX=3702 GN=AOR PE=1 SV=2	0.001	2.709	3	1	2	1	1	386	41	8.35	7.03	1	0
High	None	Q8LCL3	60S ribosomal protein L27-2 OS=Arabidopsis thaliana OX=3702 GN=RPL27B PE=2 SV=2	0.001	2.7	8	1	2	1	1	135	15.6	10.27	0	1	0
High	Master Protein Candidate	A0A1I9LSH2	Carbohydrate-binding-like fold OS=Arabidopsis thaliana OX=3702 GN=At3g62360 PE=4 SV=1	0.001	2.69	1	1	1	1	1	1197	129.4	6.15	2.07	1	0
High	Master Protein	Q9LZQ4	Carbohydrate-binding-like fold OS=Arabidopsis thaliana OX=3702 GN=T12C14_60 PE=4 SV=1	0.001	2.69	1	1	1	1	1	1227	132.9	6.42	2.07	1	0
High	Master Protein	P49201	40S ribosomal protein S23-2 OS=Arabidopsis thaliana OX=3702 GN=RPS23B PE=2 SV=2	0.001	2.684	8	1	1	1	1	142	15.7	10.37	3.04	1	0
High	Master Protein Candidate	Q9SF35	40S ribosomal protein S23-1 OS=Arabidopsis thaliana OX=3702 GN=RPS23A PE=2 SV=2	0.001	2.684	8	1	1	1	1	142	15.8	10.29	3.04	1	0
High	Master Protein Candidate	F4KD16	Germin-like protein OS=Arabidopsis thaliana OX=3702 GN=At5g39160 PE=3 SV=1	0.002	2.66	8	1	3	1	1	200	21.3	6.37	2.07	1	0
High	Master Protein	P92996	Germin-like protein subfamily 1 member 20 OS=Arabidopsis thaliana OX=3702 GN=GLP5A PE=1 SV=1	0.002	2.66	7	1	3	1	1	222	23.9	7.03	2.07	1	0
High	Master Protein Candidate	P92999	Germin-like protein subfamily 1 member 18 OS=Arabidopsis thaliana OX=3702 GN=GLP2A PE=2 SV=2	0.002	2.66	7	1	3	1	1	222	23.9	7.03	2.07	1	0
High	Master Protein Candidate	Q9FIC8	Germin-like protein subfamily 1 member 16 OS=Arabidopsis thaliana OX=3702 GN=At5g39130 PE=2 SV=1	0.002	2.66	7	1	3	1	1	222	24	6.38	2.07	1	0
High	Master Protein Candidate	B3H5Q0	Germin-like protein OS=Arabidopsis thaliana OX=3702 GN=GER2 PE=3 SV=1	0.002	2.66	8	1	3	1	1	200	21.3	6.37	2.07	1	0
High	Master Protein Candidate	F4KD18	Germin-like protein OS=Arabidopsis thaliana OX=3702 GN=At5g39160 PE=3 SV=1	0.002	2.66	7	1	3	1	1	218	23.4	6.68	2.07	1	0
High	Master Protein	Q9FZA2	Non-classical arabinogalactan protein 31 OS=Arabidopsis thaliana OX=3702 GN=AGP31 PE=1 SV=1	0.002	2.659	4	1	2	1	1	359	38.5	10.17	0	1	0
High	Master Protein Candidate	Q8LFT2	Dynamin-related protein 3B OS=Arabidopsis thaliana OX=3702 GN=DRP3B PE=1 SV=2	0.002	2.626	2	1	2	1	1	780	86.6	6.32	4.49	1	0
High	Master Protein Candidate	A0A1P8AX46	Dynamin related protein OS=Arabidopsis thaliana OX=3702 GN=DRP3B PE=1 SV=1	0.002	2.626	2	1	2	1	1	737	81.7	6.4	4.49	1	0
High	Master Protein	F4IFG2	Dynamin related protein OS=Arabidopsis thaliana OX=3702 GN=DRP3B PE=1 SV=1	0.002	2.626	2	1	2	1	1	809	89.8	6.42	4.49	1	0
High	Master Protein Candidate	Q8S944	Dynamin-related protein 3A OS=Arabidopsis thaliana OX=3702 GN=DRP3A PE=1 SV=2	0.002	2.626	2	1	2	1	1	808	89.6	6.44	4.49	1	0
High	Master Protein Candidate	F4IFG1	Dynamin related protein OS=Arabidopsis thaliana OX=3702 GN=DRP3B PE=1 SV=1	0.002	2.626	2	1	2	1	1	780	86.6	6.32	4.49	1	0
High	Master Protein Candidate	F4JJ15	Dynamin-related protein 3A OS=Arabidopsis thaliana OX=3702 GN=DRP3A PE=3 SV=1	0.002	2.626	2	1	2	1	1	809	89.7	6.44	4.49	1	0
High	None	Q2V3X4	Ribosomal protein L4/L1 family OS=Arabidopsis thaliana OX=3702 GN=At3g09630 PE=1 SV=1	0.002	2.622	7	2	3	2	1	405	44.5	10.37	0	2	0
High	Master Protein	A8MS55	Nuclear transport factor 2B OS=Arabidopsis thaliana OX=3702 GN=NTF2B PE=1 SV=1	0.002	2.62	14	1	1	1	1	134	15	6.35	3.17	1	0
High	Master Protein Candidate	Q9C7F5	Nuclear transport factor 2B OS=Arabidopsis thaliana OX=3702 GN=NTF2B PE=1 SV=1	0.002	2.62	15	1	1	1	1	126	14	6.35	3.17	1	0
High	Master Protein	O48963	Phototropin-1 OS=Arabidopsis thaliana OX=3702 GN=PHOT1 PE=1 SV=1	0.003	2.598	2	1	1	1	1	996	111.6	7.65	0	1	0
High	Master Protein Candidate	F4HST2	Dehydrin family protein OS=Arabidopsis thaliana OX=3702 GN=ERD10 PE=1 SV=1	0.003	2.553	8	1	1	1	1	259	29.4	5.47	4.47	1	0
High	Master Protein	P42759	Dehydrin ERD10 OS=Arabidopsis thaliana OX=3702 GN=ERD10 PE=1 SV=1	0.003	2.553	8	1	1	1	1	260	29.5	5.17	4.47	1	0
High	Master Protein	P17094	60S ribosomal protein L3-1 OS=Arabidopsis thaliana OX=3702 GN=ARP1 PE=1 SV=5	0.003	2.54	4	1	1	1	1	389	44.5	10.17	2.5	1	0
High	Master Protein Candidate	A8MQQ1	Ribosomal protein 1 OS=Arabidopsis thaliana OX=3702 GN=RP1 PE=1 SV=1	0.003	2.54	6	1	1	1	1	306	35	10.13	2.5	1	0
High	None	A0A1I9LP95	RAB GTPase homolog C2B OS=Arabidopsis thaliana OX=3702 GN=RABC2b PE=4 SV=1	0.003	2.527	6	1	1	0	2	195	21.9	7.77	2.65	1	0
High	None	P28188	Ras-related protein RABD2a OS=Arabidopsis thaliana OX=3702 GN=RABD2A PE=1 SV=3	0.003	2.527	5	1	1	0	2	203	22.6	5.16	2.65	1	0
High	None	Q9LZD4	Ras-related protein RABE1d OS=Arabidopsis thaliana OX=3702 GN=RABE1D PE=1 SV=1	0.003	2.527	5	1	1	0	2	216	24	7.81	2.65	1	0
High	None	Q948K6	Ras-related protein RABG1 OS=Arabidopsis thaliana OX=3702 GN=RABG1 PE=2 SV=1	0.003	2.527	5	1	1	0	2	204	23.5	7.96	2.65	1	0
High	None	O49841	Ras-related protein RABC2a OS=Arabidopsis thaliana OX=3702 GN=RABC2A PE=1 SV=1	0.003	2.527	5	1	1	0	2	210	23.3	6.23	2.65	1	0
High	None	Q9SF91	Ras-related protein RABE1e OS=Arabidopsis thaliana OX=3702 GN=RABE1E PE=1 SV=1	0.003	2.527	5	1	1	0	2	218	24.3	8.21	2.65	1	0
High	None	P28186	Ras-related protein RABE1c OS=Arabidopsis thaliana OX=3702 GN=RABE1C PE=1 SV=1	0.003	2.527	5	1	1	0	2	216	23.8	7.83	2.65	1	0
High	None	O24466	Ras-related protein RABE1a OS=Arabidopsis thaliana OX=3702 GN=RABE1A PE=1 SV=1	0.003	2.527	5	1	1	0	2	216	23.9	8.22	2.65	1	0
High	None	Q9SF92	Ras-related protein RABC2b OS=Arabidopsis thaliana OX=3702 GN=RABC2B PE=2 SV=1	0.003	2.527	5	1	1	0	2	205	22.9	8.22	2.65	1	0
High	None	Q9FJF1	Putative GTP-binding protein ara-3 OS=Arabidopsis thaliana OX=3702 GN=MMN10.12 PE=2 SV=1	0.003	2.527	5	1	1	0	2	216	23.8	8.22	2.65	1	0
High	Master Protein	P55826	Protoporphyrinogen oxidase 1, chloroplastic OS=Arabidopsis thaliana OX=3702 GN=PPOX1 PE=1 SV=1	0.003	2.526	3	1	1	1	1	537	57.7	9.03	2.5	1	0
High	Master Protein	Q9T0K5	Leucine-rich repeat extensin-like protein 3 OS=Arabidopsis thaliana OX=3702 GN=LRX3 PE=1 SV=1	0.003	2.525	1	1	1	1	1	760	82.2	6.96	2.42	1	0
High	Master Protein Candidate	Q9LHF1	Leucine-rich repeat extensin-like protein 4 OS=Arabidopsis thaliana OX=3702 GN=LRX4 PE=1 SV=1	0.003	2.525	2	1	1	1	1	494	54.7	6.93	2.42	1	0
High	Master Protein	Q9M8L4	Glycerol kinase OS=Arabidopsis thaliana OX=3702 GN=GLPK PE=1 SV=1	0.003	2.517	2	1	1	1	1	522	56.4	6.28	0	1	0
High	Master Protein Candidate	F4HS76	Actin-like ATPase superfamily protein OS=Arabidopsis thaliana OX=3702 GN=NHO1 PE=4 SV=1	0.003	2.517	2	1	1	1	1	482	52.5	6.55	0	1	0
High	None	Q9LNN3	Lectin-like protein At1g53080 OS=Arabidopsis thaliana OX=3702 GN=At1g53080 PE=2 SV=1	0.003	2.513	4	1	1	1	1	283	31.8	9.26	2.83	1	0
High	Master Protein Candidate	Q8VYP7	Putative Sar1 GTP binding protein OS=Arabidopsis thaliana OX=3702 GN=At3g62560 PE=2 SV=1	0.003	2.504	7	1	1	1	1	193	21.9	7.05	2.7	1	0
High	Master Protein	O04834	GTP-binding protein SAR1A OS=Arabidopsis thaliana OX=3702 GN=SAR1A PE=2 SV=1	0.003	2.504	7	1	1	1	1	193	22	7.53	2.7	1	0
High	Master Protein Candidate	Q3E6Q3	Ras-related small GTP-binding family protein OS=Arabidopsis thaliana OX=3702 GN=At1g02620 PE=4 SV=1	0.003	2.504	11	1	1	1	1	122	13.8	5.07	2.7	1	0
High	Master Protein Candidate	Q01474	GTP-binding protein SAR1B OS=Arabidopsis thaliana OX=3702 GN=SAR1B PE=1 SV=1	0.003	2.504	7	1	1	1	1	193	22	7.05	2.7	1	0
High	Master Protein	Q9LPZ1	Multiple organellar RNA editing factor 9, chloroplastic OS=Arabidopsis thaliana OX=3702 GN=MORF9 PE=1 SV=1	0.003	2.427	10	1	1	1	1	232	26.2	8.88	2.15	1	0
High	Master Protein	Q9FK60	Superoxide dismutase [Cu-Zn] 3 OS=Arabidopsis thaliana OX=3702 GN=CSD3 PE=1 SV=1	0.003	2.417	8	1	2	1	1	164	16.9	7.64	0	1	0
High	Master Protein Candidate	P24704	Superoxide dismutase [Cu-Zn] 1 OS=Arabidopsis thaliana OX=3702 GN=CSD1 PE=1 SV=2	0.003	2.417	9	1	2	1	1	152	15.1	5.6	0	1	0
High	Master Protein Candidate	Q3E7I4	Cyclin delta-3 OS=Arabidopsis thaliana OX=3702 GN=At4g34090 PE=4 SV=3	0.003	2.405	4	1	2	1	1	235	26.3	7.66	4.25	1	0
High	Master Protein	F4JJY7	Cyclin delta-3 OS=Arabidopsis thaliana OX=3702 GN=At4g34090 PE=4 SV=1	0.003	2.405	3	1	2	1	1	390	43.9	5.9	4.25	1	0
High	Master Protein Candidate	Q94JY0	Protein IN CHLOROPLAST ATPASE BIOGENESIS, chloroplastic OS=Arabidopsis thaliana OX=3702 GN=PAB PE=1 SV=1	0.003	2.405	3	1	2	1	1	330	36.9	6	4.25	1	0
High	Master Protein Candidate	F4HRW5	Ribosomal protein L22p/L17e family protein OS=Arabidopsis thaliana OX=3702 GN=At1g67430 PE=3 SV=1	0.003	2.348	8	1	2	1	1	131	14.8	10.04	6.13	1	0
High	Master Protein Candidate	P51413	60S ribosomal protein L17-2 OS=Arabidopsis thaliana OX=3702 GN=RPL17B PE=2 SV=2	0.003	2.348	6	1	2	1	1	175	19.8	10.11	6.13	1	0
High	Master Protein	Q93VI3	60S ribosomal protein L17-1 OS=Arabidopsis thaliana OX=3702 GN=RPL17A PE=2 SV=1	0.003	2.348	6	1	2	1	1	176	19.9	10.11	6.13	1	0
High	Master Protein	Q9SD66	Thylakoid soluble phosphoprotein OS=Arabidopsis thaliana OX=3702 GN=F13I12.120 PE=1 SV=1	0.003	2.31	12	1	1	1	1	100	10.5	9.74	3.6	1	0
High	None	P53497	Actin-12 OS=Arabidopsis thaliana OX=3702 GN=ACT12 PE=1 SV=1	0.003	2.307	5	1	2	1	1	377	41.8	5.58	5.16	1	0
High	None	A0A1P8AY15	Actin family protein OS=Arabidopsis thaliana OX=3702 GN=At2g42170 PE=3 SV=1	0.003	2.307	6	1	2	1	1	319	35.8	5.06	5.16	1	0
High	None	P53494	Actin-4 OS=Arabidopsis thaliana OX=3702 GN=ACT4 PE=1 SV=1	0.003	2.307	5	1	2	1	1	377	41.8	5.58	5.16	1	0
High	None	Q8GWA5	Actin family protein OS=Arabidopsis thaliana OX=3702 GN=At2g42170 PE=2 SV=1	0.003	2.307	5	1	2	1	1	329	37.1	5.03	5.16	1	0
High	Master Protein	Q9FY50	50S ribosomal protein L10, chloroplastic OS=Arabidopsis thaliana OX=3702 GN=RPL10 PE=2 SV=1	0.003	2.294	4	1	2	1	1	220	24.7	9.32	4.02	1	0
High	Master Protein	P37107	Signal recognition particle 54 kDa protein, chloroplastic OS=Arabidopsis thaliana OX=3702 GN=FFC PE=1 SV=1	0.003	2.294	2	1	1	1	1	564	61.2	9.44	2.05	1	0
High	Master Protein	Q02166	Anthranilate phosphoribosyltransferase, chloroplastic OS=Arabidopsis thaliana OX=3702 GN=PAT1 PE=2 SV=1	0.003	2.253	3	1	1	1	1	444	46.5	7.27	2.67	1	0
High	Master Protein	Q9FFH6	Fasciclin-like arabinogalactan protein 13 OS=Arabidopsis thaliana OX=3702 GN=FLA13 PE=1 SV=1	0.003	2.222	6	1	1	1	1	247	26.2	5.67	2.46	1	0
High	Master Protein	Q9SIE7	PLAT domain-containing protein 2 OS=Arabidopsis thaliana OX=3702 GN=PLAT2 PE=2 SV=1	0.003	2.214	4	1	1	1	1	183	20.1	5.31	2.8	1	0
High	Master Protein	Q9M5J9	Polygalacturonase inhibitor 1 OS=Arabidopsis thaliana OX=3702 GN=PGIP1 PE=1 SV=1	0.003	2.204	4	1	1	1	1	330	36.7	7.96	3.05	1	0
High	None	O04130	D-3-phosphoglycerate dehydrogenase 2, chloroplastic OS=Arabidopsis thaliana OX=3702 GN=PGDH2 PE=1 SV=2	0.003	2.182	2	1	2	1	1	624	66.4	6.13	5.59	1	0
High	Master Protein	P94040	Germin-like protein subfamily 3 member 1 OS=Arabidopsis thaliana OX=3702 GN=GLP1 PE=1 SV=1	0.003	2.172	8	1	3	1	1	208	21.5	9.2	0	1	0
High	Master Protein	Q9FMU6	Mitochondrial phosphate carrier protein 3, mitochondrial OS=Arabidopsis thaliana OX=3702 GN=MPT3 PE=1 SV=1	0.003	2.156	3	1	1	1	1	375	40.1	9.2	2.47	1	0
High	Master Protein Candidate	A1L4Y1	At3g10350 OS=Arabidopsis thaliana OX=3702 GN=At3g10350 PE=1 SV=1	0.003	2.149	3	1	1	1	1	411	44.7	7.78	1.95	1	0
High	Master Protein	F4J3Q8	P-loop containing nucleoside triphosphate hydrolases superfamily protein OS=Arabidopsis thaliana OX=3702 GN=At3g10350 PE=1 SV=1	0.003	2.149	3	1	1	1	1	433	47.2	6.93	1.95	1	0
High	Master Protein	O80576	At2g44060 OS=Arabidopsis thaliana OX=3702 GN=late embryogenesis abundant 26 PE=2 SV=1	0.003	2.141	3	1	2	1	1	325	36	4.84	5.5	1	0
High	Master Protein	Q9LDZ0	Heat shock 70 kDa protein 10, mitochondrial OS=Arabidopsis thaliana OX=3702 GN=HSP70-10 PE=1 SV=1	0.003	2.125	2	1	2	1	1	682	72.9	5.78	5.6	1	0
High	Master Protein	Q9SK50	Protein TIC 55, chloroplastic OS=Arabidopsis thaliana OX=3702 GN=TIC55 PE=1 SV=1	0.003	2.121	3	1	1	1	1	539	60.6	8.69	0	1	0
High	Master Protein Candidate	Q9LR33	60S ribosomal protein L27a-2 OS=Arabidopsis thaliana OX=3702 GN=RPL27AB PE=2 SV=1	0.003	2.119	8	1	1	1	1	146	16.3	10.51	2.64	1	0
High	Master Protein	P49637	60S ribosomal protein L27a-3 OS=Arabidopsis thaliana OX=3702 GN=RPL27AC PE=2 SV=2	0.003	2.119	8	1	1	1	1	146	16.4	10.59	2.64	1	0
High	Master Protein	Q9SKX4	50S ribosomal protein L3-1, chloroplastic OS=Arabidopsis thaliana OX=3702 GN=RPL3A PE=2 SV=1	0.003	2.084	3	1	1	1	1	271	29.3	10.43	2.15	1	0
High	Master Protein	Q9SK66	NADH dehydrogenase [ubiquinone] 1 alpha subcomplex subunit 9, mitochondrial OS=Arabidopsis thaliana OX=3702 GN=At2g20360 PE=1 SV=2	0.003	2.072	2	1	2	1	1	402	43.9	9.23	3.68	1	0
High	Master Protein	Q0WR25	Evolutionarily conserved C-terminal region 5 OS=Arabidopsis thaliana OX=3702 GN=ECT5 PE=1 SV=1	0.003	2.059	3	1	1	1	1	634	69.4	5.58	2.24	1	0
High	Master Protein Candidate	F4JB30	Evolutionarily conserved C-terminal region 5 OS=Arabidopsis thaliana OX=3702 GN=ECT5 PE=1 SV=1	0.003	2.059	3	1	1	1	1	551	60.5	6.1	2.24	1	0
High	Master Protein Candidate	A0A1I9LTL9	Evolutionarily conserved C-terminal region 5 OS=Arabidopsis thaliana OX=3702 GN=ECT5 PE=4 SV=1	0.003	2.059	3	1	1	1	1	612	67.1	5.86	2.24	1	0
High	Master Protein Candidate	A0A1I9LTL7	Evolutionarily conserved C-terminal region 5 OS=Arabidopsis thaliana OX=3702 GN=ECT5 PE=4 SV=1	0.003	2.059	3	1	1	1	1	624	68.4	5.58	2.24	1	0
High	Master Protein	P20649	ATPase 1, plasma membrane-type OS=Arabidopsis thaliana OX=3702 GN=AHA1 PE=1 SV=3	0.003	2.048	2	1	1	1	1	949	104.2	6.7	0	1	0
High	Master Protein Candidate	A0A1P8AYX4	Plasma membrane ATPase OS=Arabidopsis thaliana OX=3702 GN=HA1 PE=1 SV=1	0.003	2.048	2	1	1	1	1	885	96.8	7.12	0	1	0
High	Master Protein	Q9C5C8	Peptide methionine sulfoxide reductase B2, chloroplastic OS=Arabidopsis thaliana OX=3702 GN=MSRB2 PE=1 SV=1	0.003	2.037	4	1	1	1	1	202	22	8.56	1.96	1	0
High	Master Protein Candidate	Q84JT6	Peptide methionine sulfoxide reductase B9 OS=Arabidopsis thaliana OX=3702 GN=MSRB9 PE=2 SV=1	0.003	2.037	6	1	1	1	1	143	15.4	7.24	1.96	1	0
High	Master Protein Candidate	Q9M0Z6	Peptide methionine sulfoxide reductase B3 OS=Arabidopsis thaliana OX=3702 GN=MSRB3 PE=2 SV=2	0.003	2.037	5	1	1	1	1	176	18.8	6.29	1.96	1	0
High	Master Protein	O23049	50S ribosomal protein L6, chloroplastic OS=Arabidopsis thaliana OX=3702 GN=RPL6 PE=2 SV=1	0.003	2.034	5	1	1	1	1	223	24.7	9.89	2.69	1	0
High	Master Protein Candidate	P46286	60S ribosomal protein L8-1 OS=Arabidopsis thaliana OX=3702 GN=RPL8A PE=1 SV=2	0.004	1.994	10	1	1	1	1	258	27.8	10.9	0	1	0
High	Master Protein Candidate	Q42064	60S ribosomal protein L8-3 OS=Arabidopsis thaliana OX=3702 GN=RPL8C PE=2 SV=2	0.004	1.994	10	1	1	1	1	258	27.9	10.83	0	1	0
High	Master Protein	Q4PSL7	60S ribosomal protein L8-2 OS=Arabidopsis thaliana OX=3702 GN=RPL8B PE=2 SV=3	0.004	1.994	10	1	1	1	1	260	28	10.54	0	1	0
High	Master Protein	Q9LHH7	Bifunctional protein FolD 2 OS=Arabidopsis thaliana OX=3702 GN=FOLD2 PE=2 SV=1	0.004	1.993	5	1	2	1	1	299	31.6	8.16	5.42	1	0
High	None	A0A1P8ANY1	Semialdehyde dehydrogenase family protein OS=Arabidopsis thaliana OX=3702 GN=At1g14810 PE=4 SV=1	0.004	1.986	4	1	1	1	1	306	33.2	7.58	2.18	1	0
High	Master Protein	O48529	Rhodanese-like domain-containing protein 9, chloroplastic OS=Arabidopsis thaliana OX=3702 GN=STR9 PE=2 SV=1	0.004	1.982	4	1	1	1	1	234	25.5	8.66	2.46	1	0
High	Master Protein	Q9CAX6	40S ribosomal protein S14-2 OS=Arabidopsis thaliana OX=3702 GN=RPS14B PE=1 SV=1	0.004	1.97	7	1	1	1	1	150	16.3	10.59	2.88	1	0
High	Master Protein	O49304	At1g23130/T26J12_10 OS=Arabidopsis thaliana OX=3702 GN=At1g23130 PE=2 SV=1	0.004	1.969	4	1	2	1	1	160	17.8	6.21	3.46	1	0
High	Master Protein	Q39161	Ferredoxin--nitrite reductase, chloroplastic OS=Arabidopsis thaliana OX=3702 GN=NIR1 PE=1 SV=1	0.004	1.938	2	1	1	1	1	586	65.5	6.28	2.99	1	0
High	Master Protein	Q9FK81	Stress-response A/B barrel domain-containing protein At5g22580 OS=Arabidopsis thaliana OX=3702 GN=At5g22580 PE=1 SV=1	0.004	1.937	12	1	2	1	1	111	12.3	5.73	4.61	1	0
High	Master Protein	Q8H112	PGR5-like protein 1A, chloroplastic OS=Arabidopsis thaliana OX=3702 GN=PGRL1A PE=1 SV=1	0.004	1.936	3	1	1	1	1	324	35.7	5.29	1.94	1	0
High	Master Protein	Q9LZF5	Lectin-like protein OS=Arabidopsis thaliana OX=3702 GN=LLP PE=1 SV=1	0.004	1.928	4	1	2	1	1	274	30.1	9.38	4.45	1	0
High	Master Protein	O48528	Outer envelope pore protein 16-3, chloroplastic/mitochondrial OS=Arabidopsis thaliana OX=3702 GN=OEP163 PE=1 SV=1	0.004	1.907	6	1	1	1	1	159	17	8.37	1.64	1	0
High	Master Protein	P59230	60S ribosomal protein L10a-2 OS=Arabidopsis thaliana OX=3702 GN=RPL10AB PE=1 SV=1	0.004	1.9	4	1	2	1	1	216	24.4	9.88	0	1	0
High	Master Protein Candidate	Q8VZB9	60S ribosomal protein L10a-1 OS=Arabidopsis thaliana OX=3702 GN=RPL10AA PE=1 SV=1	0.004	1.9	4	1	2	1	1	216	24.5	9.88	0	1	0
High	Master Protein Candidate	Q9LFA3	Monodehydroascorbate reductase 1, peroxisomal OS=Arabidopsis thaliana OX=3702 GN=MDAR1 PE=1 SV=1	0.004	1.897	3	1	1	1	1	434	46.5	6.83	0	1	0
High	Master Protein	F4J849	Monodehydroascorbate reductase 1 OS=Arabidopsis thaliana OX=3702 GN=MDAR1 PE=1 SV=1	0.004	1.897	3	1	1	1	1	466	50.1	8.16	0	1	0
High	None	A0A2H1ZED6	Beta glucosidase 36 OS=Arabidopsis thaliana OX=3702 GN=BGLU36 PE=3 SV=1	0.004	1.892	2	1	2	1	1	412	47.3	9.48	3.99	1	0
High	None	Q9C8K1	Putative myrosinase 6 OS=Arabidopsis thaliana OX=3702 GN=TGG6 PE=5 SV=2	0.004	1.892	1	1	2	1	1	484	55.5	9.16	3.99	1	0
High	None	P49691	60S ribosomal protein L4-2 OS=Arabidopsis thaliana OX=3702 GN=RPL4D PE=1 SV=2	0.004	1.887	3	1	1	1	1	407	44.7	10.3	0	1	0
High	None	F4KDU5	Ribosomal protein L4/L1 family OS=Arabidopsis thaliana OX=3702 GN=At5g02870 PE=1 SV=1	0.004	1.887	3	1	1	1	1	406	44.6	10.35	0	1	0
High	Master Protein Candidate Rejected	Q9FKS4	Serine/threonine-protein kinase ATR OS=Arabidopsis thaliana OX=3702 GN=ATR PE=2 SV=2	0.004	1.868	1	1	1	0	0	2702	302.2	7.05	0	1	0
High	Master Protein Rejected	A0A1R7T394	Ataxia telangiectasia-mutated and RAD3-like protein OS=Arabidopsis thaliana OX=3702 GN=ATR PE=3 SV=1	0.004	1.868	1	1	1	0	0	2703	302.2	7.05	0	1	0
High	Master Protein	Q9LD55	Eukaryotic translation initiation factor 3 subunit A OS=Arabidopsis thaliana OX=3702 GN=TIF3A1 PE=1 SV=1	0.004	1.854	2	1	1	1	1	987	114.2	9.17	2.2	1	0
High	Master Protein	Q9C514	40S ribosomal protein S7-1 OS=Arabidopsis thaliana OX=3702 GN=RPS7A PE=2 SV=1	0.004	1.844	6	1	2	1	1	191	21.9	9.8	5.24	1	0
High	Master Protein	O80439	30S ribosomal protein S31, chloroplastic OS=Arabidopsis thaliana OX=3702 GN=RPS31 PE=1 SV=1	0.004	1.813	8	1	1	1	1	118	12.8	10.15	0	1	0
High	Master Protein	Q9CAT7	Nascent polypeptide-associated complex subunit beta OS=Arabidopsis thaliana OX=3702 GN=At1g73230 PE=2 SV=1	0.004	1.812	13	1	1	1	1	165	18	6.21	0	1	0
High	Master Protein Candidate	Q9LK29	Cytochrome c1 1, heme protein, mitochondrial OS=Arabidopsis thaliana OX=3702 GN=CYC11 PE=1 SV=1	0.004	1.806	4	1	1	1	1	307	33.6	6.13	3.13	1	0
High	Master Protein	Q9FKS5	Cytochrome c1 2, heme protein, mitochondrial OS=Arabidopsis thaliana OX=3702 GN=CYC12 PE=1 SV=1	0.004	1.806	4	1	1	1	1	307	33.7	6.18	3.13	1	0
High	Master Protein	A8MRW1	Plasma membrane intrinsic protein 1B OS=Arabidopsis thaliana OX=3702 GN=PIP1B PE=3 SV=1	0.004	1.793	3	1	2	1	1	301	32.4	8.51	5.78	1	0
High	Master Protein Candidate	B9DFR9	AT2G45960 protein OS=Arabidopsis thaliana OX=3702 GN=PIP1B PE=2 SV=1	0.004	1.793	4	1	2	1	1	274	29.1	8.85	5.78	1	0
High	Master Protein Candidate	Q06611	Aquaporin PIP1-2 OS=Arabidopsis thaliana OX=3702 GN=PIP1-2 PE=1 SV=1	0.004	1.793	3	1	2	1	1	286	30.6	9.03	5.78	1	0
High	Master Protein Candidate	O04331	Prohibitin-3, mitochondrial OS=Arabidopsis thaliana OX=3702 GN=PHB3 PE=1 SV=1	0.004	1.772	4	1	1	1	1	277	30.4	7.64	2.05	1	0
High	Master Protein	Q9LK25	Prohibitin-4, mitochondrial OS=Arabidopsis thaliana OX=3702 GN=PHB4 PE=1 SV=1	0.004	1.772	4	1	1	1	1	279	30.6	7.56	2.05	1	0
High	Master Protein	Q9LTF2	40S ribosomal protein S10-3 OS=Arabidopsis thaliana OX=3702 GN=RPS10C PE=2 SV=2	0.004	1.75	18	2	2	2	1	179	19.5	9.61	0	2	0
High	Master Protein Candidate	Q9SW09	40S ribosomal protein S10-1 OS=Arabidopsis thaliana OX=3702 GN=RPS10A PE=2 SV=1	0.004	1.75	18	2	2	2	1	177	19.4	9.67	0	2	0
High	Master Protein Candidate	F4IX01	Plant/protein OS=Arabidopsis thaliana OX=3702 GN=At3g61870 PE=4 SV=1	0.005	1.739	4	1	1	1	1	254	27.8	9.36	0	1	0
High	Master Protein	Q9M277	AT3g61870/F21F14_40 OS=Arabidopsis thaliana OX=3702 GN=F21F14.40 PE=2 SV=1	0.005	1.739	4	1	1	1	1	272	29.6	9.31	0	1	0
High	Master Protein	Q9FGI6	NADH dehydrogenase [ubiquinone] iron-sulfur protein 1, mitochondrial OS=Arabidopsis thaliana OX=3702 GN=EMB1467 PE=1 SV=2	0.005	1.724	3	1	1	1	1	748	81.5	6.64	2.45	1	0
High	Master Protein Candidate	B9DFQ9	AT5G37510 protein OS=Arabidopsis thaliana OX=3702 GN=EMB1467 PE=2 SV=1	0.005	1.724	3	1	1	1	1	745	81.1	6.64	2.45	1	0
High	Master Protein	P56808	30S ribosomal protein S19, chloroplastic OS=Arabidopsis thaliana OX=3702 GN=rps19 PE=3 SV=1	0.005	1.721	12	1	2	1	1	92	10.6	10.77	5.73	1	0
High	None	D7SFH9	Protein SUPPRESSOR OF NPR1-1 CONSTITUTIVE 4 OS=Arabidopsis thaliana OX=3702 GN=LRK10L-2.6 PE=1 SV=1	0.005	1.721	1	1	2	1	1	1118	123.7	6.7	1.66	1	0
High	None	A0A1P8AWC0	Suppressor of npr1-1 constitutive 4 OS=Arabidopsis thaliana OX=3702 GN=SNC4 PE=4 SV=1	0.005	1.721	1	1	2	1	1	1101	122.1	6.7	1.66	1	0
High	None	A0A1P8AWH4	Suppressor of npr1-1 constitutive 4 OS=Arabidopsis thaliana OX=3702 GN=SNC4 PE=4 SV=1	0.005	1.721	1	1	2	1	1	1145	126.8	6.51	1.66	1	0
High	Master Protein Candidate	O82326	Expressed protein OS=Arabidopsis thaliana OX=3702 GN=At2g14880 PE=1 SV=1	0.007	1.703	6	1	1	1	1	141	15.9	9.86	1.89	1	0
High	Master Protein	Q9SYZ4	SWIB/MDM2 domain superfamily protein OS=Arabidopsis thaliana OX=3702 GN=At4g34290 PE=1 SV=1	0.007	1.703	6	1	1	1	1	144	16	9.77	1.89	1	0
Medium	Master Protein	P62090	Photosystem I iron-sulfur center OS=Arabidopsis thaliana OX=3702 GN=psaC PE=3 SV=2	0.01	1.667	11	1	1	1	1	81	9	7.08	0	1	0
Medium	Master Protein	Q9FT52	ATP synthase subunit d, mitochondrial OS=Arabidopsis thaliana OX=3702 GN=At3g52300 PE=1 SV=3	0.01	1.655	7	1	1	1	1	168	19.6	5.19	2.4	1	0
Medium	Master Protein Candidate	Q2V3P9	ATP synthase D chain OS=Arabidopsis thaliana OX=3702 GN=ATPQ PE=1 SV=1	0.01	1.655	10	1	1	1	1	122	13.8	5.71	2.4	1	0
Medium	Master Protein	O24496	Hydroxyacylglutathione hydrolase cytoplasmic OS=Arabidopsis thaliana OX=3702 GN=GLX2-2 PE=1 SV=2	0.01	1.643	9	1	1	1	1	258	28.8	6.38	2.59	1	0
Medium	Master Protein	Q9C685	At1g51100 OS=Arabidopsis thaliana OX=3702 GN=CHLORORESPIRATORY REDUCTION 41 PE=2 SV=1	0.01	1.643	8	1	1	1	1	211	24.1	9.32	0	1	0
Medium	Master Protein	Q9S850	Sulfite oxidase OS=Arabidopsis thaliana OX=3702 GN=SOX PE=1 SV=1	0.011	1.63	3	1	1	1	1	393	43.3	8.68	2.17	1	0
Medium	Master Protein Candidate	F4JBZ5	Sulfite oxidase OS=Arabidopsis thaliana OX=3702 GN=SOX PE=4 SV=1	0.011	1.63	4	1	1	1	1	298	32.7	7.03	2.17	1	0
Medium	Master Protein	Q9FW48	Leucine-rich repeat (LRR) family protein OS=Arabidopsis thaliana OX=3702 GN=At1g33600 PE=4 SV=1	0.011	1.612	2	1	1	1	1	478	52.4	8.97	0	1	0
Medium	Master Protein	Q9SAC6	Alpha-glucan water dikinase 1, chloroplastic OS=Arabidopsis thaliana OX=3702 GN=GWD1 PE=1 SV=2	0.011	1.606	1	1	1	1	1	1399	156.5	5.92	2.67	1	0
Medium	Master Protein	Q9SPK5	Formate--tetrahydrofolate ligase OS=Arabidopsis thaliana OX=3702 GN=THFS PE=2 SV=1	0.011	1.599	3	1	2	1	1	634	67.8	6.71	0	1	0
Medium	Master Protein	Q9SIE3	At2g22230/T26C19.11 OS=Arabidopsis thaliana OX=3702 GN=At2g22230 PE=2 SV=2	0.011	1.594	4	1	2	1	1	220	24.2	8.48	4.62	1	0
Medium	Master Protein Candidate	Q9LX13	(3R)-hydroxymyristoyl-[acyl carrier protein] dehydratase-like protein OS=Arabidopsis thaliana OX=3702 GN=At5g10160 PE=2 SV=1	0.011	1.594	4	1	2	1	1	219	24.1	9.26	4.62	1	0
Medium	None	A0A1P8BC98	UDP-glucose pyrophosphorylase 2 OS=Arabidopsis thaliana OX=3702 GN=UGP2 PE=4 SV=1	0.011	1.581	3	1	1	1	1	385	42.9	6.46	1.76	1	0
Medium	None	P57751	UTP--glucose-1-phosphate uridylyltransferase 1 OS=Arabidopsis thaliana OX=3702 GN=UGP1 PE=2 SV=1	0.011	1.581	3	1	1	1	1	470	51.9	6.01	1.76	1	0
Medium	None	A0A1P8BC93	UDP-glucose pyrophosphorylase 2 OS=Arabidopsis thaliana OX=3702 GN=UGP2 PE=4 SV=1	0.011	1.581	4	1	1	1	1	336	37.2	7.05	1.76	1	0
Medium	None	F4KGY8	UDP-glucose pyrophosphorylase 2 OS=Arabidopsis thaliana OX=3702 GN=UGP2 PE=4 SV=1	0.011	1.581	3	1	1	1	1	390	43.7	7.84	1.76	1	0
Medium	Master Protein	Q42479	Calcium-dependent protein kinase 3 OS=Arabidopsis thaliana OX=3702 GN=CPK3 PE=1 SV=1	0.011	1.581	2	1	2	1	1	529	59.3	6.37	0	1	0
Medium	Master Protein	Q93XY5	Tetraspanin-18 OS=Arabidopsis thaliana OX=3702 GN=TOM2AH2 PE=1 SV=1	0.011	1.58	5	1	1	1	1	270	29.7	5.27	3.38	1	0
Medium	Master Protein	Q93XM7	Mitochondrial carnitine/acylcarnitine carrier-like protein OS=Arabidopsis thaliana OX=3702 GN=BOU PE=1 SV=1	0.011	1.577	5	1	1	1	1	300	31	9.52	1.67	1	0
Medium	Master Protein Candidate	P43287	Aquaporin PIP2-2 OS=Arabidopsis thaliana OX=3702 GN=PIP2-2 PE=1 SV=2	0.011	1.574	4	1	2	1	1	285	30.4	7.81	4.98	1	0
Medium	Master Protein Candidate	P43286	Aquaporin PIP2-1 OS=Arabidopsis thaliana OX=3702 GN=PIP2-1 PE=1 SV=1	0.011	1.574	3	1	2	1	1	287	30.5	8.4	4.98	1	0
Medium	Master Protein	A0A1P8AYA1	Plasma membrane intrinsic protein 2 OS=Arabidopsis thaliana OX=3702 GN=PIP2B PE=3 SV=1	0.011	1.574	3	1	2	1	1	328	35.4	8.75	4.98	1	0
Medium	Master Protein	Q94F00	Phosphatase IMPL1, chloroplastic OS=Arabidopsis thaliana OX=3702 GN=IMPL1 PE=1 SV=2	0.011	1.556	4	1	1	1	1	371	40.4	7.24	2.25	1	0
Medium	Master Protein	Q9LHI0	NADH dehydrogenase [ubiquinone] 1 alpha subcomplex subunit 6 OS=Arabidopsis thaliana OX=3702 GN=At3g12260 PE=2 SV=1	0.011	1.554	5	1	2	1	1	133	15.1	9.09	3.42	1	0
Medium	None	Q9SF55	Histone H2B.5 OS=Arabidopsis thaliana OX=3702 GN=At3g09480 PE=1 SV=3	0.019	1.517	7	1	2	1	1	126	14	10.07	3.84	1	0
Medium	Master Protein Candidate	Q9SW18	Magnesium protoporphyrin IX methyltransferase, chloroplastic OS=Arabidopsis thaliana OX=3702 GN=CHLM PE=1 SV=1	0.019	1.514	5	1	1	1	1	312	33.8	7.87	2.45	1	0
Medium	Master Protein	A0A1P8B4G1	Magnesium-protoporphyrin IX methyltransferase OS=Arabidopsis thaliana OX=3702 GN=CHLM PE=4 SV=1	0.019	1.514	5	1	1	1	1	326	35.6	6.28	2.45	1	0
Medium	Master Protein Candidate	F4JX83	Tetratricopeptide repeat (TPR)-like superfamily protein OS=Arabidopsis thaliana OX=3702 GN=MNC6.3 PE=4 SV=1	0.019	1.5	5	1	1	1	1	250	27.2	6.95	0	1	0
Medium	Master Protein	A0A1P8BAQ0	Tetratricopeptide repeat (TPR)-like superfamily protein OS=Arabidopsis thaliana OX=3702 GN=MNC6.3 PE=4 SV=1	0.019	1.5	5	1	1	1	1	259	28.2	7.56	0	1	0
Medium	Master Protein Candidate	P81760	Thylakoid lumenal 17.4 kDa protein, chloroplastic OS=Arabidopsis thaliana OX=3702 GN=TL17 PE=1 SV=2	0.019	1.5	6	1	1	1	1	236	25.6	6.21	0	1	0
Medium	Master Protein	Q9SR70	Peptidyl-prolyl cis-trans isomerase FKBP16-4, chloroplastic OS=Arabidopsis thaliana OX=3702 GN=FKBP16-4 PE=1 SV=1	0.019	1.485	6	1	1	1	1	230	24.5	9.63	0	1	0
Medium	None	Q9LYG5	Alpha/beta-Hydrolases superfamily protein OS=Arabidopsis thaliana OX=3702 GN=At5g11650 PE=2 SV=1	0.021	1.476	2	1	1	0	2	390	43.2	8.51	1.84	1	0
Medium	None	A0A1R7T386	Alpha/beta-Hydrolases superfamily protein OS=Arabidopsis thaliana OX=3702 GN=At5g11650 PE=4 SV=1	0.021	1.476	2	1	1	0	2	301	32.9	9.74	1.84	1	0
Medium	Master Protein	Q8H124	Uncharacterized protein At2g34460, chloroplastic OS=Arabidopsis thaliana OX=3702 GN=At2g34460 PE=1 SV=1	0.023	1.454	3	1	1	1	1	280	30.5	8.97	2.09	1	0
Medium	Master Protein	Q84WT8	Cysteine proteinase inhibitor 4 OS=Arabidopsis thaliana OX=3702 GN=CYS4 PE=3 SV=2	0.023	1.452	10	1	1	1	1	117	12.5	9.13	1.62	1	0
Medium	Master Protein	O49292	PsbP domain-containing protein 4, chloroplastic OS=Arabidopsis thaliana OX=3702 GN=PPD4 PE=1 SV=2	0.023	1.44	4	1	1	1	1	260	28.5	7.5	2.88	1	0
Medium	None	Q9LUB9	BTB/POZ domain-containing protein At5g48130 OS=Arabidopsis thaliana OX=3702 GN=At5g48130 PE=2 SV=1	0.023	1.429	1	1	2	0	2	625	71.3	7.83	1.76	1	0
Medium	Master Protein	Q9ASS6	Photosynthetic NDH subunit of lumenal location 5, chloroplastic OS=Arabidopsis thaliana OX=3702 GN=PNSL5 PE=1 SV=1	0.023	1.417	5	1	1	1	1	259	28.3	9.31	0	1	0
Medium	Master Protein Candidate	P47192	Vesicle-associated membrane protein 722 OS=Arabidopsis thaliana OX=3702 GN=VAMP722 PE=2 SV=2	0.023	1.416	8	1	2	1	1	221	24.9	8.9	2.49	1	0
Medium	Master Protein Candidate	A0A1P8AS81	Vesicle-associated membrane protein 721 OS=Arabidopsis thaliana OX=3702 GN=VAMP721 PE=4 SV=1	0.023	1.416	12	1	2	1	1	141	16.1	9.33	2.49	1	0
Medium	Master Protein	B9DH97	AT2G33120 protein OS=Arabidopsis thaliana OX=3702 GN=SAR1 PE=2 SV=1	0.023	1.416	7	1	2	1	1	229	25.8	8.78	2.49	1	0
Medium	Master Protein Candidate	Q9ZTW3	Vesicle-associated membrane protein 721 OS=Arabidopsis thaliana OX=3702 GN=VAMP721 PE=2 SV=1	0.023	1.416	8	1	2	1	1	219	24.7	8.75	2.49	1	0
Medium	Master Protein	P62095	Cytochrome b559 subunit beta OS=Arabidopsis thaliana OX=3702 GN=psbF PE=1 SV=1	0.022	1.415	21	1	2	1	1	39	4.4	10.74	0	1	0
Medium	Master Protein	Q9FG81	Aluminum induced protein with YGL and LRDR motifs OS=Arabidopsis thaliana OX=3702 GN=MQD19.19 PE=1 SV=1	0.022	1.405	6	1	1	1	1	251	27.5	6.87	2.51	1	0
Medium	Master Protein Candidate	P49206	40S ribosomal protein S26-1 OS=Arabidopsis thaliana OX=3702 GN=RPS26A PE=2 SV=2	0.022	1.402	7	1	1	1	1	131	14.7	11.09	1.73	1	0
Medium	Master Protein Candidate	Q9LYK9	40S ribosomal protein S26-3 OS=Arabidopsis thaliana OX=3702 GN=RPS26C PE=2 SV=1	0.022	1.402	7	1	1	1	1	130	14.6	11.09	1.73	1	0
Medium	Master Protein	Q8LPJ7	40S ribosomal protein S26-2 OS=Arabidopsis thaliana OX=3702 GN=RPS26B PE=2 SV=2	0.022	1.402	7	1	1	1	1	133	14.8	11.09	1.73	1	0
Medium	Master Protein Candidate	Q9LZQ0	Cytochrome c oxidase subunit 5C-2 OS=Arabidopsis thaliana OX=3702 GN=At3g62400 PE=3 SV=1	0.022	1.399	13	1	2	1	1	64	7	8.6	4.82	1	0
Medium	Master Protein	O22912	Probable cytochrome c oxidase subunit 5C-1 OS=Arabidopsis thaliana OX=3702 GN=At2g47380 PE=1 SV=1	0.022	1.399	13	1	2	1	1	64	7.1	8.6	4.82	1	0
Medium	None	A0A1I9LRL2	Aldolase-type TIM barrel family protein OS=Arabidopsis thaliana OX=3702 GN=HAOX1 PE=3 SV=1	0.022	1.383	2	1	2	1	1	255	27.8	8.76	3.58	1	0
Medium	None	Q9LJH5	Peroxisomal (S)-2-hydroxy-acid oxidase GLO4 OS=Arabidopsis thaliana OX=3702 GN=GLO4 PE=2 SV=1	0.022	1.383	2	1	2	1	1	363	39.9	8.12	3.58	1	0
Medium	None	A0A1I9LRL0	Aldolase-type TIM barrel family protein OS=Arabidopsis thaliana OX=3702 GN=HAOX1 PE=3 SV=1	0.022	1.383	2	1	2	1	1	319	34.7	9.09	3.58	1	0
Medium	Master Protein	P56792	50S ribosomal protein L14, chloroplastic OS=Arabidopsis thaliana OX=3702 GN=rpl14 PE=3 SV=1	0.022	1.382	8	1	2	1	1	122	13.6	9.29	1.86	1	0
Medium	Master Protein	Q9LP45	26S proteasome non-ATPase regulatory subunit 11 homolog OS=Arabidopsis thaliana OX=3702 GN=RPN6 PE=1 SV=1	0.022	1.378	3	1	1	1	1	419	46.7	6.67	2.32	1	0
Medium	Master Protein	Q94AR8	3-isopropylmalate dehydratase large subunit, chloroplastic OS=Arabidopsis thaliana OX=3702 GN=IIL1 PE=1 SV=1	0.024	1.371	3	1	1	1	1	509	55	7.84	0	1	0
Medium	Master Protein	Q9LEW3	Aspartyl protease AED1 OS=Arabidopsis thaliana OX=3702 GN=AED1 PE=2 SV=1	0.024	1.369	2	1	1	1	1	464	49.4	5.06	2.05	1	0
Medium	Master Protein	P48421	Cytochrome P450 83A1 OS=Arabidopsis thaliana OX=3702 GN=CYP83A1 PE=1 SV=2	0.024	1.34	2	1	1	1	1	502	57.4	8.48	1.74	1	0
Medium	Master Protein Candidate	Q8L9P8	Protein RALF-like 33 OS=Arabidopsis thaliana OX=3702 GN=RALFL33 PE=2 SV=1	0.025	1.333	7	1	2	1	1	116	12.8	9.19	4.63	1	0
Medium	Master Protein	Q9LUS7	Rapid alkalinization factor 23 OS=Arabidopsis thaliana OX=3702 GN=RALF23 PE=1 SV=1	0.025	1.333	6	1	2	1	1	138	15	8.51	4.63	1	0
Medium	Master Protein	A0A1P8AZ49	Pyridoxamine 5'-phosphate oxidase family protein OS=Arabidopsis thaliana OX=3702 GN=At2g04690 PE=4 SV=1	0.025	1.327	7	1	1	1	1	230	26	7.88	2.63	1	0
Medium	Master Protein Candidate	Q8RY62	At2g04690/F28I8.27 OS=Arabidopsis thaliana OX=3702 GN=At2g04690 PE=2 SV=1	0.025	1.327	8	1	1	1	1	210	23.6	7.49	2.63	1	0
Medium	Master Protein Candidate	F4IFA9	Pyridoxamine 5'-phosphate oxidase family protein OS=Arabidopsis thaliana OX=3702 GN=At2g04690 PE=4 SV=1	0.025	1.327	8	1	1	1	1	203	22.8	7.03	2.63	1	0
Medium	Master Protein	Q96529	Adenylosuccinate synthetase, chloroplastic OS=Arabidopsis thaliana OX=3702 GN=PURA PE=1 SV=1	0.026	1.275	3	1	2	1	1	490	52.9	7.14	0	1	0
Medium	Master Protein Candidate	Q9T043	60S ribosomal protein L14-2 OS=Arabidopsis thaliana OX=3702 GN=RPL14B PE=1 SV=1	0.027	1.248	11	1	1	1	1	134	15.5	10.04	0	1	0
Medium	Master Protein	Q9SIM4	60S ribosomal protein L14-1 OS=Arabidopsis thaliana OX=3702 GN=RPL14A PE=2 SV=1	0.027	1.248	11	1	1	1	1	134	15.5	10.13	0	1	0
Medium	Master Protein Rejected	Q9SD62	Putative receptor-like protein kinase At3g47110 OS=Arabidopsis thaliana OX=3702 GN=At3g47110 PE=3 SV=1	0.027	1.244	1	1	2	0	0	1025	111.5	7.3	4.59	1	0
Medium	Master Protein	O04209	Clathrin light chain 2 OS=Arabidopsis thaliana OX=3702 GN=CLC2 PE=1 SV=1	0.029	1.192	6	1	2	1	1	258	28.8	4.98	4.57	1	0
Medium	Master Protein Rejected	Q9LMI1	Ribosomal protein L1p/L10e family OS=Arabidopsis thaliana OX=3702 GN=At1g06380 PE=1 SV=1	0.029	1.176	3	1	2	0	0	254	28.7	9.45	5.5	1	0
Medium	Master Protein	Q8VX13	Protein disulfide isomerase-like 1-3 OS=Arabidopsis thaliana OX=3702 GN=PDIL1-3 PE=2 SV=1	0.029	1.17	3	1	1	1	1	579	64.2	4.83	1.86	1	0
Medium	Master Protein Candidate	A0A1P8APN5	Cyclophilin-like peptidyl-prolyl cis-trans isomerase family protein OS=Arabidopsis thaliana OX=3702 GN=At1g74070 PE=4 SV=1	0.029	1.159	4	1	2	1	1	280	30.4	9.35	0	1	0
Medium	Master Protein	F4HTT6	Peptidyl-prolyl cis-trans isomerase CYP26-2, chloroplastic OS=Arabidopsis thaliana OX=3702 GN=CYP26-2 PE=2 SV=1	0.028	1.159	4	1	2	1	1	317	34.4	9.47	0	1	0
Medium	Master Protein	Q8LLD4	Rab escort protein 1 OS=Arabidopsis thaliana OX=3702 GN=REP PE=1 SV=2	0.029	1.155	3	1	1	1	1	563	61.5	4.89	2.21	1	0
Medium	Master Protein Candidate	A0A1P8APX4	PHD finger family protein OS=Arabidopsis thaliana OX=3702 GN=At1g77800 PE=4 SV=1	0.029	1.148	1	1	1	1	1	1295	142.8	7.88	0	1	0
Medium	Master Protein Candidate	A0A1P8APU9	PHD finger family protein OS=Arabidopsis thaliana OX=3702 GN=At1g77800 PE=4 SV=1	0.029	1.148	1	1	1	1	1	1424	156.8	7.68	0	1	0
Medium	Master Protein Candidate	F4I8J4	PHD finger family protein OS=Arabidopsis thaliana OX=3702 GN=At1g77800 PE=4 SV=1	0.029	1.148	1	1	1	1	1	1374	151.5	7.65	0	1	0
Medium	Master Protein Candidate	A0A1P8APX3	PHD finger family protein OS=Arabidopsis thaliana OX=3702 GN=At1g77800 PE=4 SV=1	0.029	1.148	1	1	1	1	1	1337	147.4	7.88	0	1	0
Medium	Master Protein Candidate	F4I8J3	PHD finger family protein OS=Arabidopsis thaliana OX=3702 GN=At1g77800 PE=4 SV=1	0.029	1.148	1	1	1	1	1	1375	151.6	7.65	0	1	0
Medium	Master Protein	A0A1P8APX1	PHD finger family protein OS=Arabidopsis thaliana OX=3702 GN=At1g77800 PE=4 SV=1	0.029	1.148	1	1	1	1	1	1425	156.9	7.68	0	1	0
Medium	Master Protein Candidate	A0A1P8APX7	PHD finger family protein OS=Arabidopsis thaliana OX=3702 GN=At1g77800 PE=4 SV=1	0.029	1.148	1	1	1	1	1	1364	150.3	7.81	0	1	0
Medium	None	Q9FF90	60S ribosomal protein L13-3 OS=Arabidopsis thaliana OX=3702 GN=RPL13D PE=1 SV=1	0.029	1.138	4	1	2	1	1	206	23.5	11	3.67	1	0
Medium	None	Q9SMT4	Putative 60S ribosomal protein L13-2 OS=Arabidopsis thaliana OX=3702 GN=RPL13C PE=3 SV=1	0.029	1.138	4	1	2	1	1	206	23.5	10.55	3.67	1	0
Medium	None	Q56W28	Glutamate decarboxylase OS=Arabidopsis thaliana OX=3702 GN=GAD2 PE=2 SV=1	0.031	1.108	3	1	1	1	1	365	41.7	6.47	2.14	1	0
Medium	Master Protein Candidate	A0A1P8BD41	NADH-ubiquinone oxidoreductase-like protein OS=Arabidopsis thaliana OX=3702 GN=MXC20.6 PE=4 SV=1	0.031	1.096	8	1	1	1	1	119	13.6	6.68	0	1	0
Medium	Master Protein	Q9FLX7	Probable NADH dehydrogenase [ubiquinone] 1 alpha subcomplex subunit 5, mitochondrial OS=Arabidopsis thaliana OX=3702 GN=At5g52840 PE=1 SV=1	0.031	1.096	5	1	1	1	1	169	19.2	4.77	0	1	0
Medium	Master Protein	Q8H1F1	AP-5 complex subunit zeta-1 OS=Arabidopsis thaliana OX=3702 GN=At3g15160 PE=2 SV=1	0.031	1.094	5	1	1	1	1	562	62.4	6.76	2.41	1	0
Medium	Master Protein Candidate	A0A1I9LS84	AP-5 complex subunit zeta-1 OS=Arabidopsis thaliana OX=3702 GN=At3g15160 PE=4 SV=1	0.031	1.094	5	1	1	1	1	519	57.6	7.05	2.41	1	0
Medium	Master Protein	Q9M1X0	Ribosome-recycling factor, chloroplastic OS=Arabidopsis thaliana OX=3702 GN=RRF PE=2 SV=2	0.031	1.085	4	1	1	1	1	275	30.4	9.44	0	1	0
Medium	Master Protein	O80840	Phosphomannomutase OS=Arabidopsis thaliana OX=3702 GN=PMM PE=1 SV=1	0.032	1.013	6	1	1	1	1	246	27.7	5.54	0	1	0
Medium	Master Protein	Q9LEA7	Germin-like protein subfamily 1 member 8 OS=Arabidopsis thaliana OX=3702 GN=GLP9 PE=2 SV=2	0.038	0.923	7	1	1	1	1	222	23.6	6.77	0	1	0
Medium	Master Protein Candidate	A0A1P8B252	Peptidylprolyl isomerase OS=Arabidopsis thaliana OX=3702 GN=At2g43560 PE=4 SV=1	0.04	0.887	7	1	1	1	1	167	17.6	5.14	1.91	1	0
Medium	Master Protein	O22870	Peptidyl-prolyl cis-trans isomerase FKBP16-3, chloroplastic OS=Arabidopsis thaliana OX=3702 GN=FKBP16-3 PE=1 SV=2	0.04	0.887	5	1	1	1	1	223	23.5	8.25	1.91	1	0
Medium	Master Protein Candidate	F4K3U5	Polyketide cyclase/dehydrase/lipid transport superfamily protein OS=Arabidopsis thaliana OX=3702 GN=MHF15.4 PE=1 SV=1	0.043	0.863	3	1	1	1	1	479	55.1	5.38	0	1	0
Medium	Master Protein Candidate	A0A1P8BGX8	Polyketide cyclase/dehydrase/lipid transport superfamily protein OS=Arabidopsis thaliana OX=3702 GN=MHF15.4 PE=1 SV=1	0.043	0.863	4	1	1	1	1	390	44.7	5.16	0	1	0
Medium	Master Protein	F4K3U7	Polyketide cyclase/dehydrase/lipid transport superfamily protein OS=Arabidopsis thaliana OX=3702 GN=MHF15.4 PE=1 SV=1	0.043	0.863	3	1	1	1	1	486	55.9	5.29	0	1	0
Medium	Master Protein Candidate	Q8RWI8	Polyketide cyclase/dehydrase/lipid transport superfamily protein OS=Arabidopsis thaliana OX=3702 GN=MHF15.4 PE=1 SV=1	0.043	0.863	4	1	1	1	1	405	46.5	5.19	0	1	0
Medium	None	Q9ZVA1	EP1-like glycoprotein 1 OS=Arabidopsis thaliana OX=3702 GN=At1g78820 PE=2 SV=1	0.043	0.862	3	1	1	1	1	455	50.6	8.47	1.98	1	0
Medium	Master Protein	Q9FGC6	F-box protein, putative (DUF295) OS=Arabidopsis thaliana OX=3702 GN=At5g67040 PE=4 SV=1	0.043	0.849	10	1	1	1	1	165	18.8	6.6	2.09	1	0
Medium	None	Q9SU80	Alkaline-phosphatase-like family protein OS=Arabidopsis thaliana OX=3702 GN=At4g29710 PE=4 SV=1	0.045	0.829	5	1	2	1	1	133	15	9.92	0	1	0
Medium	None	A0A1I9LNF1	Glutamate dehydrogenase OS=Arabidopsis thaliana OX=3702 GN=GDH3 PE=3 SV=1	0.045	0.829	2	1	2	1	1	360	38.6	5.58	0	1	0
Medium	None	Q9S7A0	Probable glutamate dehydrogenase 3 OS=Arabidopsis thaliana OX=3702 GN=GSH3 PE=3 SV=1	0.045	0.829	2	1	2	1	1	411	44.5	6.13	0	1	0
Medium	Master Protein	O64517	Metacaspase-4 OS=Arabidopsis thaliana OX=3702 GN=AMC4 PE=1 SV=1	0.045	0.811	3	1	1	1	1	418	45.5	4.82	1.91	1	0
Medium	Master Protein Candidate	O64518	Metacaspase-5 OS=Arabidopsis thaliana OX=3702 GN=AMC5 PE=1 SV=1	0.045	0.811	3	1	1	1	1	410	44.8	6.61	1.91	1	0
Medium	Master Protein	Q9C564	HXXXD-type acyl-transferase family protein OS=Arabidopsis thaliana OX=3702 GN=T8E3.5 PE=4 SV=1	0.047	0.792	2	1	1	1	1	444	49.3	6.34	0	1	0
Medium	Master Protein	O81148	Proteasome subunit alpha type-4-A OS=Arabidopsis thaliana OX=3702 GN=PAC1 PE=1 SV=1	0.048	0.786	4	1	1	1	1	250	27.5	7.11	0	1	0
Low	Master Protein	Q8VZF3	Probable glutamyl endopeptidase, chloroplastic OS=Arabidopsis thaliana OX=3702 GN=GEP PE=2 SV=2	0.052	0.776	1	1	1	1	1	960	106	6.42	0	1	0
Low	Master Protein	Q9LNB6	Hsp70-Hsp90 organizing protein 1 OS=Arabidopsis thaliana OX=3702 GN=HOP1 PE=2 SV=1	0.058	0.738	3	1	1	1	1	572	64.5	6.28	2.67	1	0
Low	Master Protein Candidate	A8MQX9	Bifunctional inhibitor/lipid-transfer protein/seed storage 2S albumin superfamily protein OS=Arabidopsis thaliana OX=3702 GN=At4g22517 PE=4 SV=1	0.058	0.73	10	1	2	1	1	115	12.2	8.34	4.48	1	0
Low	Master Protein	A8MQX6	Bifunctional inhibitor/lipid-transfer protein/seed storage 2S albumin superfamily protein OS=Arabidopsis thaliana OX=3702 GN=At4g22513 PE=4 SV=1	0.058	0.73	10	1	2	1	1	115	12.1	7.88	4.48	1	0
Low	Master Protein	F4IRX7	SOUL heme-binding family protein OS=Arabidopsis thaliana OX=3702 GN=SOUL-1 PE=1 SV=2	0.058	0.725	6	1	1	1	1	246	27.3	9.2	0	1	0
Low	Master Protein	Q8GY23	E3 ubiquitin-protein ligase UPL1 OS=Arabidopsis thaliana OX=3702 GN=UPL1 PE=1 SV=3	0.058	0.71	0	1	2	1	1	3681	404.7	5.1	0	1	0
Low	Master Protein Candidate	Q8H0T4	E3 ubiquitin-protein ligase UPL2 OS=Arabidopsis thaliana OX=3702 GN=UPL2 PE=1 SV=3	0.058	0.71	0	1	2	1	1	3658	403.4	4.94	0	1	0
Low	Master Protein	Q9FJP3	50S ribosomal protein L29, chloroplastic OS=Arabidopsis thaliana OX=3702 GN=RPL29 PE=1 SV=1	0.058	0.707	6	1	1	1	1	173	19.4	10.51	0	1	0
Low	Master Protein	Q9SQQ9	Myb-related protein 2 OS=Arabidopsis thaliana OX=3702 GN=MYR2 PE=1 SV=1	0.06	0.674	4	1	1	1	1	394	44.6	7.17	2.69	1	0
Low	Master Protein	Q9FGY1	Beta-D-xylosidase 1 OS=Arabidopsis thaliana OX=3702 GN=BXL1 PE=1 SV=1	0.061	0.662	2	1	1	1	1	774	83.5	8.51	0	1	0
Low	Master Protein Candidate	Q9LNE3	Probable fructokinase-2 OS=Arabidopsis thaliana OX=3702 GN=At1g06030 PE=2 SV=1	0.061	0.653	3	1	1	1	1	329	35.9	5.03	2.46	1	0
Low	Master Protein Candidate	Q9M1B9	Probable fructokinase-4 OS=Arabidopsis thaliana OX=3702 GN=At3g59480 PE=2 SV=1	0.061	0.653	3	1	1	1	1	326	35	5.36	2.46	1	0
Low	Master Protein	Q9LNE4	Probable fructokinase-3 OS=Arabidopsis thaliana OX=3702 GN=At1g06020 PE=2 SV=1	0.061	0.653	3	1	1	1	1	345	37.6	5.76	2.46	1	0
Low	Master Protein Candidate	Q9SID0	Probable fructokinase-1 OS=Arabidopsis thaliana OX=3702 GN=At2g31390 PE=2 SV=1	0.061	0.653	3	1	1	1	1	325	35.3	5.49	2.46	1	0
Low	Master Protein Candidate	Q9FLH8	Probable fructokinase-7 OS=Arabidopsis thaliana OX=3702 GN=At5g51830 PE=1 SV=1	0.061	0.653	3	1	1	1	1	343	37	5.15	2.46	1	0
Low	Master Protein Candidate	F4IWV2	2-oxoglutarate dehydrogenase, E1 component OS=Arabidopsis thaliana OX=3702 GN=At3g55410 PE=1 SV=1	0.061	0.652	1	1	1	1	1	1017	115.1	6.93	0	1	0
Low	Master Protein	Q9FLH2	2-oxoglutarate dehydrogenase, E1 component OS=Arabidopsis thaliana OX=3702 GN=MPA24.10 PE=2 SV=1	0.061	0.652	1	1	1	1	1	1025	116.3	7.3	0	1	0
Low	Master Protein	F4JM05	Photosystem II reaction center Psb28 protein OS=Arabidopsis thaliana OX=3702 GN=PSB28 PE=3 SV=1	0.061	0.644	6	1	1	1	1	198	21.9	9.99	0	1	0
Low	Master Protein Candidate	Q8W0Y8	Photosystem II reaction center PSB28 protein, chloroplastic OS=Arabidopsis thaliana OX=3702 GN=PSB28 PE=2 SV=1	0.061	0.644	7	1	1	1	1	183	20.2	9.41	0	1	0
Low	Master Protein	Q4VCM1	Phospholipid--sterol O-acyltransferase OS=Arabidopsis thaliana OX=3702 GN=PSAT PE=2 SV=2	0.062	0.642	1	1	1	1	1	633	71.6	6.38	1.74	1	0
Low	Master Protein	Q3ECD0	RNA pseudouridine synthase 2, chloroplastic OS=Arabidopsis thaliana OX=3702 GN=At1g76050 PE=2 SV=1	0.065	0.616	5	1	1	1	1	430	46.7	7.42	0	1	0
Low	Master Protein	P56797	30S ribosomal protein S2, chloroplastic OS=Arabidopsis thaliana OX=3702 GN=rps2 PE=3 SV=1	0.065	0.602	4	1	2	1	1	236	26.9	9.66	0	1	0
Low	Master Protein Candidate	A0A1I9LN79	Auxin canalization protein (DUF828) OS=Arabidopsis thaliana OX=3702 GN=At3g22810 PE=4 SV=1	0.065	0.601	7	1	1	1	1	334	36.2	9.91	0	1	0
Low	Master Protein	Q9LUI0	Auxin canalization protein (DUF828) OS=Arabidopsis thaliana OX=3702 GN=At3g22810 PE=4 SV=1	0.065	0.601	5	1	1	1	1	472	51.2	9.09	0	1	0
Low	Master Protein	Q9FYJ1	Putative F-box protein At1g31000 OS=Arabidopsis thaliana OX=3702 GN=At1g31000 PE=4 SV=1	0.065	0.6	6	1	1	1	1	365	42.5	8.41	0	1	0
Low	Master Protein	P83291	NADH-cytochrome b5 reductase-like protein OS=Arabidopsis thaliana OX=3702 GN=CBR2 PE=1 SV=2	0.068	0.584	3	1	1	1	1	328	36	8.69	2.39	1	0
Low	Master Protein	Q9M328	AT3G53990 protein OS=Arabidopsis thaliana OX=3702 GN=F5K20_290 PE=2 SV=1	0.072	0.573	12	1	1	1	1	160	17.8	5.94	0	1	0
Low	Master Protein Candidate	Q8LC99	Adenine nucleotide alpha hydrolases-like superfamily protein OS=Arabidopsis thaliana OX=3702 GN=At3g53990 PE=2 SV=1	0.072	0.573	15	1	1	1	1	126	14.2	6.14	0	1	0
Low	Master Protein	Q9C7F7	Non-specific lipid transfer protein GPI-anchored 1 OS=Arabidopsis thaliana OX=3702 GN=LTPG1 PE=2 SV=1	0.072	0.572	7	1	1	1	1	193	19.7	7.65	0	1	0
Low	Master Protein Candidate	F4JFY4	Stromal ascorbate peroxidase OS=Arabidopsis thaliana OX=3702 GN=SAPX PE=3 SV=1	0.072	0.569	5	1	2	1	1	346	37.4	9.06	4.14	1	0
Low	Master Protein	Q42592	L-ascorbate peroxidase S, chloroplastic/mitochondrial OS=Arabidopsis thaliana OX=3702 GN=APXS PE=1 SV=2	0.072	0.569	4	1	2	1	1	372	40.4	8.28	4.14	1	0
Low	Master Protein Candidate	F4JFY5	Stromal ascorbate peroxidase OS=Arabidopsis thaliana OX=3702 GN=SAPX PE=3 SV=1	0.072	0.569	4	1	2	1	1	371	40.3	7.94	4.14	1	0
Low	None	O04922	Probable glutathione peroxidase 2 OS=Arabidopsis thaliana OX=3702 GN=GPX2 PE=1 SV=1	0.076	0.555	5	1	2	1	1	169	18.9	5.72	0	1	0
Low	Master Protein	Q5S2C4	Protein NAP1 OS=Arabidopsis thaliana OX=3702 GN=NAP1 PE=1 SV=2	0.076	0.551	1	1	1	1	1	1425	158.8	6.55	0	1	0
Low	Master Protein	Q9LIF9	Beta-glucosidase 19 OS=Arabidopsis thaliana OX=3702 GN=BGLU19 PE=2 SV=1	0.081	0.534	1	1	2	1	1	527	60	6.65	3.35	1	0
Low	Master Protein	Q9FIJ2	NADH dehydrogenase [ubiquinone] 1 alpha subcomplex subunit 2 OS=Arabidopsis thaliana OX=3702 GN=At5g47890 PE=3 SV=1	0.089	0.502	6	1	1	1	1	97	10.8	9.44	1.79	1	0
Low	None	Q9SCX3	Elongation factor 1-beta 2 OS=Arabidopsis thaliana OX=3702 GN=At5g19510 PE=1 SV=1	0.093	0.501	4	1	2	1	1	224	24.2	4.56	0	1	0
Low	None	Q84WM9	Elongation factor 1-beta 1 OS=Arabidopsis thaliana OX=3702 GN=At5g12110 PE=2 SV=2	0.093	0.501	4	1	2	1	1	228	24.8	4.69	0	1	0
Low	Master Protein	Q9LRN0	AT3g24190/MUJ8_17 OS=Arabidopsis thaliana OX=3702 GN=At3g24190 PE=2 SV=1	0.098	0.477	1	1	2	1	1	793	87.4	5.54	3.87	1	0
Low	None	Q8RXN9	Putative beta-glucosidase 5 OS=Arabidopsis thaliana OX=3702 GN=BGLU5 PE=5 SV=2	0.104	0.458	1	1	1	1	1	500	56.6	6.3	0	1	0
Low	None	A0A1I9LTV2	Beta glucosidase 8 OS=Arabidopsis thaliana OX=3702 GN=BGLU8 PE=3 SV=1	0.104	0.458	2	1	1	1	1	412	46.7	6.86	0	1	0
Low	None	A0A1P8B0I9	Beta glucosidase 17 OS=Arabidopsis thaliana OX=3702 GN=BGLU17 PE=3 SV=1	0.104	0.458	1	1	1	1	1	548	62.7	6.1	0	1	0
Low	None	Q9FLU9	Beta-glucosidase 31 OS=Arabidopsis thaliana OX=3702 GN=BGLU31 PE=2 SV=1	0.104	0.458	1	1	1	1	1	534	61.8	6.27	0	1	0
Low	None	Q9FH03	Beta-glucosidase 12 OS=Arabidopsis thaliana OX=3702 GN=BGLU12 PE=2 SV=1	0.104	0.458	1	1	1	1	1	507	56.9	8.57	0	1	0
Low	None	Q3ECW8	Beta-glucosidase 1 OS=Arabidopsis thaliana OX=3702 GN=BGLU1 PE=3 SV=2	0.104	0.458	1	1	1	1	1	517	58.5	6.8	0	1	0
Low	None	A0A2H1ZE91	Beta glucosidase 11 OS=Arabidopsis thaliana OX=3702 GN=BGLU11 PE=3 SV=1	0.104	0.458	2	1	1	1	1	435	48.1	5.62	0	1	0
Low	None	Q9SLA0	Beta-glucosidase 14 OS=Arabidopsis thaliana OX=3702 GN=BGLU14 PE=3 SV=2	0.104	0.458	1	1	1	1	1	489	55	8.48	0	1	0
Low	None	A0A1P8AWA5	Glycosyl hydrolase superfamily protein OS=Arabidopsis thaliana OX=3702 GN=BGLU1 PE=3 SV=1	0.104	0.458	2	1	1	1	1	411	46.5	6.47	0	1	0
Low	None	Q9LZJ1	Beta-glucosidase 7 OS=Arabidopsis thaliana OX=3702 GN=BGLU7 PE=2 SV=2	0.104	0.458	1	1	1	1	1	502	56.4	6.09	0	1	0
Low	None	O64882	Beta-glucosidase 17 OS=Arabidopsis thaliana OX=3702 GN=BGLU17 PE=2 SV=1	0.104	0.458	1	1	1	1	1	517	59.1	5.85	0	1	0
Low	None	O82772	Probable inactive beta-glucosidase 25 OS=Arabidopsis thaliana OX=3702 GN=BGLU25 PE=2 SV=1	0.104	0.458	1	1	1	1	1	531	59.8	6.54	0	1	0
Low	None	Q9FLU8	Beta-glucosidase 32 OS=Arabidopsis thaliana OX=3702 GN=BGLU32 PE=2 SV=2	0.104	0.458	1	1	1	1	1	534	61.6	6.35	0	1	0
Low	None	A8MSC6	Beta glucosidase 16 OS=Arabidopsis thaliana OX=3702 GN=BGLU16 PE=3 SV=1	0.103	0.458	2	1	1	1	1	451	51.1	6.48	0	1	0
Low	None	O65458	Beta-glucosidase 3 OS=Arabidopsis thaliana OX=3702 GN=BGLU3 PE=3 SV=2	0.103	0.458	1	1	1	1	1	507	57.3	6.43	0	1	0
Low	None	A0A1I9LTV6	Beta glucosidase 8 OS=Arabidopsis thaliana OX=3702 GN=BGLU8 PE=3 SV=1	0.103	0.458	1	1	1	1	1	523	59.1	6.37	0	1	0
Low	None	Q9LU02	Beta-glucosidase 13 OS=Arabidopsis thaliana OX=3702 GN=BGLU13 PE=2 SV=1	0.103	0.458	1	1	1	1	1	507	56.9	8.76	0	1	0
Low	None	A0A1P8B4J5	Beta glucosidase 10 OS=Arabidopsis thaliana OX=3702 GN=BGLU10 PE=3 SV=1	0.103	0.458	2	1	1	1	1	420	47.2	5.72	0	1	0
Low	None	Q67XN2	Beta-glucosidase 8 OS=Arabidopsis thaliana OX=3702 GN=BGLU8 PE=2 SV=1	0.103	0.458	1	1	1	1	1	497	56.1	6.25	0	1	0
Low	None	A0A1P8BA32	Beta glucosidase 41 OS=Arabidopsis thaliana OX=3702 GN=BGLU41 PE=3 SV=1	0.103	0.458	2	1	1	1	1	438	50.4	7.05	0	1	0
Low	None	A0A1P8AWB3	Glycosyl hydrolase superfamily protein OS=Arabidopsis thaliana OX=3702 GN=BGLU1 PE=3 SV=1	0.103	0.458	2	1	1	1	1	416	47	6.35	0	1	0
Low	None	A0A1I9LTV4	Beta glucosidase 8 OS=Arabidopsis thaliana OX=3702 GN=BGLU8 PE=3 SV=1	0.103	0.458	2	1	1	1	1	461	52.3	6.28	0	1	0
Low	None	Q93ZI4	Beta-glucosidase 10 OS=Arabidopsis thaliana OX=3702 GN=BGLU10 PE=2 SV=1	0.103	0.458	1	1	1	1	1	508	57	5.62	0	1	0
Low	None	B3H5Q1	Beta-glucosidase 11 OS=Arabidopsis thaliana OX=3702 GN=BGLU11 PE=2 SV=2	0.103	0.458	1	1	1	1	1	521	58	6.48	0	1	0
Low	None	A0A1P8BER6	Beta glucosidase 31 OS=Arabidopsis thaliana OX=3702 GN=BGLU31 PE=3 SV=1	0.103	0.458	2	1	1	1	1	455	52.2	5.73	0	1	0
Low	None	A0A1P8B7T6	Beta glucosidase 9 OS=Arabidopsis thaliana OX=3702 GN=BGLU9 PE=3 SV=1	0.102	0.458	2	1	1	1	1	421	47.3	5.97	0	1	0
Low	None	A0A1I9LTV7	Beta glucosidase 8 OS=Arabidopsis thaliana OX=3702 GN=BGLU8 PE=3 SV=1	0.102	0.458	2	1	1	1	1	436	49.9	6.9	0	1	0
Low	None	A0A1P8AW88	Glycosyl hydrolase superfamily protein OS=Arabidopsis thaliana OX=3702 GN=BGLU1 PE=3 SV=1	0.102	0.458	1	1	1	1	1	506	57.2	6.58	0	1	0
Low	None	A0A1P8AVJ5	Beta glucosidase 6 OS=Arabidopsis thaliana OX=3702 GN=BGLU6 PE=3 SV=1	0.102	0.458	2	1	1	1	1	292	32.8	5.33	0	1	0
Low	None	O64879	Beta-glucosidase 15 OS=Arabidopsis thaliana OX=3702 GN=BGLU15 PE=1 SV=1	0.102	0.458	1	1	1	1	1	506	56.9	7.71	0	1	0
Low	None	F4JAM3	Beta glucosidase 16 OS=Arabidopsis thaliana OX=3702 GN=BGLU16 PE=3 SV=1	0.102	0.458	2	1	1	1	1	462	52.3	6.48	0	1	0
Low	None	A0A1P8ATT2	Beta glucosidase 4 OS=Arabidopsis thaliana OX=3702 GN=BGLU4 PE=3 SV=1	0.102	0.458	1	1	1	1	1	505	57	7.05	0	1	0
Low	None	Q9FIU7	Putative beta-glucosidase 41 OS=Arabidopsis thaliana OX=3702 GN=BGLU41 PE=3 SV=2	0.102	0.458	1	1	1	1	1	535	61.4	6.39	0	1	0
Low	None	A0A1P8BA38	Beta glucosidase 41 OS=Arabidopsis thaliana OX=3702 GN=BGLU41 PE=3 SV=1	0.102	0.458	2	1	1	1	1	451	51.5	6.73	0	1	0
Low	None	Q9ZUI3	Beta-glucosidase 4 OS=Arabidopsis thaliana OX=3702 GN=BGLU4 PE=2 SV=2	0.102	0.458	1	1	1	1	1	512	57.9	6.89	0	1	0
Low	None	Q9M1C9	Beta-glucosidase 30 OS=Arabidopsis thaliana OX=3702 GN=BGLU30 PE=2 SV=1	0.102	0.458	1	1	1	1	1	577	66.9	5.94	0	1	0
Low	None	Q682B4	Putative beta-glucosidase 6 OS=Arabidopsis thaliana OX=3702 GN=BGLU6 PE=5 SV=1	0.102	0.458	2	1	1	1	1	379	42.6	5.41	0	1	0
Low	None	A0A1P8B0J0	Beta glucosidase 17 OS=Arabidopsis thaliana OX=3702 GN=BGLU17 PE=3 SV=1	0.102	0.458	2	1	1	1	1	394	45.2	8.65	0	1	0
Low	None	A0A1I9LTV8	Beta glucosidase 8 OS=Arabidopsis thaliana OX=3702 GN=BGLU8 PE=3 SV=1	0.101	0.458	2	1	1	1	1	369	41.7	5.95	0	1	0
Low	None	Q9STP4	Beta-glucosidase 9 OS=Arabidopsis thaliana OX=3702 GN=BGLU9 PE=2 SV=2	0.101	0.458	1	1	1	1	1	506	56.9	5.71	0	1	0
Low	None	A0A1I9LT24	Glycosyl hydrolase superfamily protein OS=Arabidopsis thaliana OX=3702 GN=DIN2 PE=3 SV=1	0.101	0.458	2	1	1	1	1	458	53	6.28	0	1	0
Low	None	Q9M1D0	Beta-glucosidase 16 OS=Arabidopsis thaliana OX=3702 GN=BGLU16 PE=2 SV=1	0.101	0.458	1	1	1	1	1	514	58	6.48	0	1	0
Low	None	A0A1I9LRH0	Beta glucosidase 7 OS=Arabidopsis thaliana OX=3702 GN=BGLU7 PE=3 SV=1	0.101	0.458	2	1	1	1	1	424	47.6	5.81	0	1	0
Low	Master Protein	Q9LNC5	110 kDa U5 small nuclear ribonucleoprotein component CLO OS=Arabidopsis thaliana OX=3702 GN=CLO PE=1 SV=1	0.101	0.457	3	1	1	1	1	987	110.4	5.19	0	1	0
Low	Master Protein Candidate	F4JWP9	109 kDa U5 small nuclear ribonucleoprotein component GFL OS=Arabidopsis thaliana OX=3702 GN=GFL PE=2 SV=1	0.101	0.457	3	1	1	1	1	973	108.7	5.24	0	1	0
Low	Master Protein	Q8GXX5	At4g00980 OS=Arabidopsis thaliana OX=3702 GN=A_TM018A10.1 PE=2 SV=1	0.105	0.441	3	1	1	1	1	488	55	7.87	0	1	0
Low	Master Protein	Q42601	Carbamoyl-phosphate synthase large chain, chloroplastic OS=Arabidopsis thaliana OX=3702 GN=CARB PE=1 SV=1	0.107	0.429	1	1	1	1	1	1187	129.9	5.73	0	1	0
Low	None	Q9LHB9	Peroxidase 32 OS=Arabidopsis thaliana OX=3702 GN=PER32 PE=1 SV=3	0.109	0.42	2	1	2	0	2	352	38.8	6.67	0	1	0
Low	Master Protein	Q9FIH1	F-box protein At5g42460 OS=Arabidopsis thaliana OX=3702 GN=At5g42460 PE=2 SV=2	0.109	0.418	3	1	1	1	1	388	45.3	6.32	0	1	0
Low	Master Protein Candidate	A0A2H1ZEI5	Pumilio 5 OS=Arabidopsis thaliana OX=3702 GN=PUM5 PE=4 SV=1	0.116	0.406	1	1	1	1	1	913	101.5	5.88	2.26	1	0
Low	Master Protein	Q9LJX4	Pumilio homolog 5 OS=Arabidopsis thaliana OX=3702 GN=APUM5 PE=1 SV=2	0.116	0.406	1	1	1	1	1	961	106.9	5.96	2.26	1	0
Low	Master Protein Candidate	A0A178VL84	Pumilio 5 OS=Arabidopsis thaliana OX=3702 GN=PUM5 PE=4 SV=1	0.116	0.406	1	1	1	1	1	949	105.6	6	2.26	1	0
Low	Master Protein	P56791	50S ribosomal protein L2, chloroplastic OS=Arabidopsis thaliana OX=3702 GN=rpl2-A PE=3 SV=1	0.117	0.405	6	1	1	1	1	274	29.8	10.84	0	1	0
Low	Master Protein	Q94B77	Formin-like protein 5 OS=Arabidopsis thaliana OX=3702 GN=FH5 PE=2 SV=2	0.118	0.397	2	1	1	1	1	900	98.3	8.65	0	1	0
Low	Master Protein	F4JGI8	Transmembrane protein OS=Arabidopsis thaliana OX=3702 GN=At4g06534 PE=4 SV=1	0.12	0.393	3	1	1	1	1	405	44.7	9.42	0	1	0
Low	Master Protein	Q9SAC9	AP-1 complex subunit mu-1 OS=Arabidopsis thaliana OX=3702 GN=AP1M1 PE=3 SV=1	0.123	0.386	3	1	1	1	1	428	49.2	6.64	0	1	0
Low	Master Protein	A0A1P8B510	Terpene synthase 02 OS=Arabidopsis thaliana OX=3702 GN=TPS02 PE=3 SV=1	0.123	0.385	2	1	1	1	1	493	57.9	6	0	1	0
Low	None	F4JTD3	RNA binding Plectin/S10 domain-containing protein OS=Arabidopsis thaliana OX=3702 GN=At4g25740 PE=4 SV=1	0.125	0.377	11	1	1	1	1	149	16.4	9.48	0	1	0
Low	Master Protein	P0C2F6	Putative ribonuclease H protein At1g65750 OS=Arabidopsis thaliana OX=3702 GN=At1g65750 PE=3 SV=1	0.125	0.376	2	1	1	1	1	620	70.5	9.61	0	1	0
Low	Master Protein	Q8RWB8	E3 ubiquitin-protein ligase UPL6 OS=Arabidopsis thaliana OX=3702 GN=UPL6 PE=2 SV=1	0.134	0.35	2	1	1	1	1	1029	117.6	6.83	0	1	0
Low	Master Protein Candidate	B3H5A6	Ubiquitin protein ligase 6 OS=Arabidopsis thaliana OX=3702 GN=UPL6 PE=4 SV=1	0.134	0.35	2	1	1	1	1	1015	116.1	7.39	0	1	0
Low	Master Protein	Q96327	ERBB-3 BINDING PROTEIN 1 OS=Arabidopsis thaliana OX=3702 GN=EBP1 PE=1 SV=1	0.14	0.324	3	1	1	1	1	392	43	6.8	0	1	0
Low	Master Protein Candidate	A0A1P8AQG0	Histone acetyltransferase of the CBP family 4 OS=Arabidopsis thaliana OX=3702 GN=HAC4 PE=4 SV=1	0.152	0.307	1	1	1	1	1	1456	165	8.87	0	1	0
Low	Master Protein	Q9LE42	Histone acetyltransferase HAC5 OS=Arabidopsis thaliana OX=3702 GN=HAC5 PE=2 SV=1	0.152	0.307	1	1	1	1	1	1670	188.1	8.47	0	1	0
Low	Master Protein Candidate	A0A1I9LPG3	Histone acetyltransferase of the CBP family 5 OS=Arabidopsis thaliana OX=3702 GN=HAC5 PE=4 SV=1	0.152	0.307	1	1	1	1	1	1589	179.2	8.41	0	1	0
Low	Master Protein Candidate	Q9LG11	Histone acetyltransferase HAC4 OS=Arabidopsis thaliana OX=3702 GN=HAC4 PE=2 SV=2	0.152	0.307	1	1	1	1	1	1470	166.7	8.88	0	1	0
Low	Master Protein	Q9M011	Light-inducible protein ATLS1 OS=Arabidopsis thaliana OX=3702 GN=F7A7.17 PE=2 SV=1	0.152	0.305	10	1	1	1	1	115	12.1	6.62	1.63	1	0
Low	Master Protein Candidate	A0A1I9LRK5	DnaJ (DUF3353) OS=Arabidopsis thaliana OX=3702 GN=At3g51140 PE=1 SV=1	0.155	0.299	10	1	1	1	1	229	26.1	10.73	2.43	1	0
Low	Master Protein	Q94C78	DnaJ (DUF3353) OS=Arabidopsis thaliana OX=3702 GN=At3g51140 PE=1 SV=1	0.155	0.299	8	1	1	1	1	278	31.5	10.67	2.43	1	0
Low	Master Protein	Q9LTL2	Cytochrome P450 71B25 OS=Arabidopsis thaliana OX=3702 GN=CYP71B25 PE=2 SV=1	0.156	0.294	3	1	1	1	1	501	57.5	7.97	0	1	0
Low	Master Protein	Q9M2A1	Pentatricopeptide repeat-containing protein At3g42630 OS=Arabidopsis thaliana OX=3702 GN=At3g42630 PE=2 SV=2	0.159	0.283	5	1	2	1	1	415	47.7	8.88	0	1	0
Low	Master Protein	F4IPJ1	Phosphatidylinositol 3-and 4-kinase family protein with FAT domain-containing protein OS=Arabidopsis thaliana OX=3702 GN=At2g17930 PE=3 SV=1	0.176	0.264	0	1	1	1	1	3858	436.1	7.28	0	1	0
Low	Master Protein Candidate	A0A1P8B8N3	Chromomethylase 2 OS=Arabidopsis thaliana OX=3702 GN=CMT2 PE=3 SV=1	0.182	0.261	1	1	1	1	1	1247	139.6	8	0	1	0
Low	Master Protein	Q94F87	DNA (cytosine-5)-methyltransferase CMT2 OS=Arabidopsis thaliana OX=3702 GN=CMT2 PE=2 SV=3	0.182	0.261	1	1	1	1	1	1295	144.9	8.31	0	1	0
Low	Master Protein	Q9FEE2	Probable serine/threonine-protein phosphatase 2A regulatory subunit B'' subunit TON2 OS=Arabidopsis thaliana OX=3702 GN=TON2 PE=1 SV=1	0.182	0.26	4	1	1	1	1	480	55	4.98	0	1	0
Low	Master Protein	Q8GYA8	FBD domain-containing protein At3g58975 OS=Arabidopsis thaliana OX=3702 GN=At3g58975 PE=2 SV=1	0.187	0.251	8	1	1	1	1	215	24.8	6.07	1.96	1	0
Low	Master Protein	P0DMS1	Protein NETWORKED 2A OS=Arabidopsis thaliana OX=3702 GN=NET2A PE=2 SV=1	0.187	0.25	1	1	1	1	1	947	108	5.4	0	1	0
Low	Master Protein	Q9M0G7	MDIS1-interacting receptor like kinase 1 OS=Arabidopsis thaliana OX=3702 GN=MIK1 PE=1 SV=1	0.186	0.248	1	1	1	1	1	1013	110.4	6.99	0	1	0
Low	Master Protein	A0A1I9LRC7	Methyl esterase 11 OS=Arabidopsis thaliana OX=3702 GN=MES11 PE=4 SV=1	0.192	0.227	6	1	1	1	1	279	31.3	9.57	0	1	0
Low	Master Protein	F4IYD1	C2H2 and C2HC zinc fingers superfamily protein OS=Arabidopsis thaliana OX=3702 GN=At3g01030 PE=4 SV=1	0.198	0.223	7	1	1	1	1	371	42.6	9.35	0	1	0
Low	Master Protein	Q9M143	Putative RING zinc finger protein OS=Arabidopsis thaliana OX=3702 GN=At4g01270 PE=4 SV=1	0.198	0.221	3	1	2	1	1	506	56.5	8.13	2.31	1	0
Low	Master Protein Rejected	Q56YU0	Aldehyde dehydrogenase family 2 member C4 OS=Arabidopsis thaliana OX=3702 GN=ALDH2C4 PE=1 SV=2	0.202	0.22	2	1	1	0	0	501	54.3	5.69	2.28	1	0
Low	Master Protein	Q56Y11	Dehydrodolichyl diphosphate synthase 2 OS=Arabidopsis thaliana OX=3702 GN=At5g58770 PE=2 SV=2	0.202	0.22	5	1	1	1	1	310	35.9	6.11	1.76	1	0
Low	Master Protein	Q9SYN4	F-box/LRR protein OS=Arabidopsis thaliana OX=3702 GN=T30F21.19 PE=4 SV=1	0.212	0.198	5	1	1	1	1	342	39	6.79	0	1	0
Low	Master Protein	Q9LFS2	Protein GAMETE EXPRESSED 3 OS=Arabidopsis thaliana OX=3702 GN=GEX3 PE=2 SV=1	0.218	0.193	1	1	1	1	1	641	73.3	5.53	1.76	1	0
Low	Master Protein	O22190	Indole-3-acetic acid-amido synthetase GH3.3 OS=Arabidopsis thaliana OX=3702 GN=GH3.3 PE=1 SV=1	0.219	0.186	4	1	1	1	1	595	67.5	6.32	0	1	0
Low	Master Protein Candidate	F4ISI7	Nucleosome assembly protein 12 OS=Arabidopsis thaliana OX=3702 GN=NAP1:2 PE=1 SV=1	0.227	0.174	3	1	1	1	1	372	42.8	4.4	0	1	0
Low	Master Protein	Q9ZUP3	Nucleosome assembly protein 1;2 OS=Arabidopsis thaliana OX=3702 GN=NAP1;2 PE=1 SV=1	0.227	0.174	3	1	1	1	1	379	43.5	4.44	0	1	0
Low	Master Protein Candidate	A8MRK6	Nucleosome assembly protein 12 OS=Arabidopsis thaliana OX=3702 GN=NAP1:2 PE=1 SV=1	0.227	0.174	3	1	1	1	1	373	42.9	4.41	0	1	0
Low	Master Protein	Q9M885	40S ribosomal protein S7-2 OS=Arabidopsis thaliana OX=3702 GN=RPS7B PE=2 SV=1	0.226	0.172	6	1	1	1	1	191	22.2	9.77	0	1	0
Low	Master Protein Candidate	F4IJ44	Calcium-binding EF hand family protein OS=Arabidopsis thaliana OX=3702 GN=TCH3 PE=4 SV=1	0.228	0.171	3	1	1	1	1	289	32.8	5.07	2.15	1	0
Low	Master Protein	P25071	Calmodulin-like protein 12 OS=Arabidopsis thaliana OX=3702 GN=CML12 PE=1 SV=3	0.228	0.171	3	1	1	1	1	324	36.8	5.05	2.15	1	0
Low	Master Protein Candidate	F4IJ45	Calcium-binding EF hand family protein OS=Arabidopsis thaliana OX=3702 GN=TCH3 PE=4 SV=1	0.228	0.171	5	1	1	1	1	199	22.6	4.98	2.15	1	0
Low	Master Protein Candidate	A0A1P8B183	Calcium-binding EF hand family protein OS=Arabidopsis thaliana OX=3702 GN=TCH3 PE=4 SV=1	0.228	0.171	7	1	1	1	1	145	16.3	4.91	2.15	1	0
Low	Master Protein	O82205	40S ribosomal protein S15a-2 OS=Arabidopsis thaliana OX=3702 GN=RPS15AB PE=2 SV=1	0.236	0.163	14	1	1	1	1	129	14.7	9.74	0	1	0
Low	Master Protein	O80519	F14J9.2 protein OS=Arabidopsis thaliana OX=3702 GN=At1g09360 PE=4 SV=1	0.245	0.156	7	1	1	1	1	188	21.3	6.39	0	1	0
Master Protein Candidate	A0A1P8APU9	PHD finger family protein OS=Arabidopsis thaliana OX=3702 GN=At1g77800 PE=4 SV=1	0.024	1.311	1	1	1	1	1	0
Master Protein Candidate	F4I8J3	PHD finger family protein OS=Arabidopsis thaliana OX=3702 GN=At1g77800 PE=4 SV=1	0.024	1.311	1	1	1	1	1	0
Master Protein Candidate	F4I8J4	PHD finger family protein OS=Arabidopsis thaliana OX=3702 GN=At1g77800 PE=4 SV=1	0.024	1.311	1	1	1	1	1	0
Master Protein	A0A1P8APX1	PHD finger family protein OS=Arabidopsis thaliana OX=3702 GN=At1g77800 PE=4 SV=1	0.024	1.311	1	1	1	1	1	0
Master Protein Candidate	A0A1P8APX3	PHD finger family protein OS=Arabidopsis thaliana OX=3702 GN=At1g77800 PE=4 SV=1	0.024	1.311	1	1	1	1	1	0
Master Protein Candidate	A0A1P8APX4	PHD finger family protein OS=Arabidopsis thaliana OX=3702 GN=At1g77800 PE=4 SV=1	0.024	1.311	1	1	1	1	1	0
Master Protein	O22912	Probable cytochrome c oxidase subunit 5C-1 OS=Arabidopsis thaliana OX=3702 GN=At2g47380 PE=1 SV=1	0.024	1.294	13	1	2	1	1	4.82
Master Protein Candidate	Q9LZQ0	Cytochrome c oxidase subunit 5C-2 OS=Arabidopsis thaliana OX=3702 GN=At3g62400 PE=3 SV=1	0.024	1.294	13	1	2	1	1	4.82
Master Protein	O24456	Receptor for activated C kinase 1A OS=Arabidopsis thaliana OX=3702 GN=RACK1A PE=1 SV=2	0.024	1.293	4	1	1	1	1	0
Master Protein	Q9LP45	26S proteasome non-ATPase regulatory subunit 11 homolog OS=Arabidopsis thaliana OX=3702 GN=RPN6 PE=1 SV=1	0.024	1.291	3	1	1	1	1	2.32
Master Protein Rejected	Q9FNX8	Lipoxygenase 4, chloroplastic OS=Arabidopsis thaliana OX=3702 GN=LOX4 PE=2 SV=1	0.025	1.266	1	1	1	0	0	0
None	Q9SMT4	Putative 60S ribosomal protein L13-2 OS=Arabidopsis thaliana OX=3702 GN=RPL13C PE=3 SV=1	0.026	1.234	4	1	3	1	1	3.67
None	Q9FF90	60S ribosomal protein L13-3 OS=Arabidopsis thaliana OX=3702 GN=RPL13D PE=1 SV=1	0.026	1.234	4	1	3	1	1	3.67
Master Protein	P16180	30S ribosomal protein S17, chloroplastic OS=Arabidopsis thaliana OX=3702 GN=RPS17 PE=1 SV=1	0.027	1.197	7	1	1	1	1	2.08
Master Protein	Q8S4Y1	Acetyl-CoA acetyltransferase, cytosolic 1 OS=Arabidopsis thaliana OX=3702 GN=AAT1 PE=1 SV=1	0.028	1.194	4	1	1	1	1	2.81
Master Protein	Q9SIE3	At2g22230/T26C19.11 OS=Arabidopsis thaliana OX=3702 GN=At2g22230 PE=2 SV=2	0.028	1.193	4	1	2	1	1	4.62
Master Protein Candidate	Q9LX13	(3R)-hydroxymyristoyl-[acyl carrier protein] dehydratase-like protein OS=Arabidopsis thaliana OX=3702 GN=At5g10160 PE=2 SV=1	0.028	1.193	4	1	2	1	1	4.62
None	Q42521	Glutamate decarboxylase 1 OS=Arabidopsis thaliana OX=3702 GN=GAD1 PE=1 SV=2	0.036	1.152	1	1	1	1	1	2.52
None	Q9LSH2	Glutamate decarboxylase 5 OS=Arabidopsis thaliana OX=3702 GN=GAD5 PE=2 SV=1	0.036	1.152	1	1	1	1	1	2.52
None	Q9ZPS4	Glutamate decarboxylase 3 OS=Arabidopsis thaliana OX=3702 GN=GAD3 PE=2 SV=1	0.036	1.152	1	1	1	1	1	2.52
None	Q9ZPS3	Glutamate decarboxylase 4 OS=Arabidopsis thaliana OX=3702 GN=GAD4 PE=1 SV=1	0.036	1.152	1	1	1	1	1	2.52
None	F4J6E0	Pyridoxal phosphate (PLP)-dependent transferases superfamily protein OS=Arabidopsis thaliana OX=3702 GN=At3g17720 PE=3 SV=1	0.036	1.152	4	1	1	1	1	2.52
None	A0A1P8AZ64	Glutamate decarboxylase OS=Arabidopsis thaliana OX=3702 GN=GAD4 PE=1 SV=1	0.036	1.152	1	1	1	1	1	2.52
Master Protein	Q9ASS6	Photosynthetic NDH subunit of lumenal location 5, chloroplastic OS=Arabidopsis thaliana OX=3702 GN=PNSL5 PE=1 SV=1	0.036	1.151	5	1	1	1	1	0
Master Protein Candidate	F4IX90	Phosphoinositide phospholipase C OS=Arabidopsis thaliana OX=3702 GN=PLC2 PE=1 SV=1	0.037	1.136	2	1	1	1	1	0
Master Protein	Q39033	Phosphoinositide phospholipase C 2 OS=Arabidopsis thaliana OX=3702 GN=PLC2 PE=1 SV=1	0.037	1.136	2	1	1	1	1	0
Master Protein	Q9SCX3	Elongation factor 1-beta 2 OS=Arabidopsis thaliana OX=3702 GN=At5g19510 PE=1 SV=1	0.039	1.122	8	1	1	1	1	0
Master Protein	O81148	Proteasome subunit alpha type-4-A OS=Arabidopsis thaliana OX=3702 GN=PAC1 PE=1 SV=1	0.039	1.112	4	1	2	1	1	0
Master Protein	Q9CAT7	Nascent polypeptide-associated complex subunit beta OS=Arabidopsis thaliana OX=3702 GN=At1g73230 PE=2 SV=1	0.039	1.095	13	1	1	1	1	0
Master Protein	P83291	NADH-cytochrome b5 reductase-like protein OS=Arabidopsis thaliana OX=3702 GN=CBR2 PE=1 SV=2	0.04	1.087	3	1	1	1	1	2.39
Master Protein	P56792	50S ribosomal protein L14, chloroplastic OS=Arabidopsis thaliana OX=3702 GN=rpl14 PE=3 SV=1	0.041	1.072	8	1	2	1	1	1.86
Master Protein Candidate	A8MQX9	Bifunctional inhibitor/lipid-transfer protein/seed storage 2S albumin superfamily protein OS=Arabidopsis thaliana OX=3702 GN=At4g22517 PE=4 SV=1	0.041	1.068	10	1	2	1	1	4.48
Master Protein	A8MQX6	Bifunctional inhibitor/lipid-transfer protein/seed storage 2S albumin superfamily protein OS=Arabidopsis thaliana OX=3702 GN=At4g22513 PE=4 SV=1	0.041	1.068	10	1	2	1	1	4.48
Master Protein	Q9SIM4	60S ribosomal protein L14-1 OS=Arabidopsis thaliana OX=3702 GN=RPL14A PE=2 SV=1	0.041	1.067	11	1	1	1	1	0
Master Protein Candidate	Q9T043	60S ribosomal protein L14-2 OS=Arabidopsis thaliana OX=3702 GN=RPL14B PE=1 SV=1	0.041	1.067	11	1	1	1	1	0
Master Protein	O80940	Protein trichome birefringence-like 15 OS=Arabidopsis thaliana OX=3702 GN=TBL15 PE=3 SV=1	0.045	1.044	3	1	1	1	1	1.71
Master Protein	P48421	Cytochrome P450 83A1 OS=Arabidopsis thaliana OX=3702 GN=CYP83A1 PE=1 SV=2	0.046	1.039	2	1	1	1	1	1.74
None	Q9LUW0	Linoleate 9S-lipoxygenase 5 OS=Arabidopsis thaliana OX=3702 GN=LOX5 PE=2 SV=2	0.048	1.019	1	1	1	1	1	0
Master Protein	Q9FFT9	DEAD-box ATP-dependent RNA helicase 32 OS=Arabidopsis thaliana OX=3702 GN=RH32 PE=2 SV=1	0.049	1.018	2	1	1	1	1	0
None	Q9ZVA1	EP1-like glycoprotein 1 OS=Arabidopsis thaliana OX=3702 GN=At1g78820 PE=2 SV=1	0.049	1.015	3	1	1	1	1	1.98
Master Protein	F4HTT6	Peptidyl-prolyl cis-trans isomerase CYP26-2, chloroplastic OS=Arabidopsis thaliana OX=3702 GN=CYP26-2 PE=2 SV=1	0.049	1.009	4	1	1	1	1	0
Master Protein Candidate	A0A1P8APN5	Cyclophilin-like peptidyl-prolyl cis-trans isomerase family protein OS=Arabidopsis thaliana OX=3702 GN=At1g74070 PE=4 SV=1	0.049	1.009	4	1	1	1	1	0
Master Protein	F4JRB0	Transcription factor HHO5 OS=Arabidopsis thaliana OX=3702 GN=HHO5 PE=1 SV=1	0.049	0.997	6	1	1	1	1	2.01
Master Protein	O22870	Peptidyl-prolyl cis-trans isomerase FKBP16-3, chloroplastic OS=Arabidopsis thaliana OX=3702 GN=FKBP16-3 PE=1 SV=2	0.049	0.986	5	1	1	1	1	1.91
Master Protein Candidate	A0A1P8B252	Peptidylprolyl isomerase OS=Arabidopsis thaliana OX=3702 GN=At2g43560 PE=4 SV=1	0.049	0.986	7	1	1	1	1	1.91
Master Protein Candidate	F4K015	Dynamin-like protein OS=Arabidopsis thaliana OX=3702 GN=DL1 PE=1 SV=1	0.052	0.975	2	1	1	1	1	2.34
Master Protein	P42697	Dynamin-related protein 1A OS=Arabidopsis thaliana OX=3702 GN=DRP1A PE=1 SV=3	0.052	0.975	2	1	1	1	1	2.34
Master Protein	Q94C78	DnaJ (DUF3353) OS=Arabidopsis thaliana OX=3702 GN=At3g51140 PE=1 SV=1	0.052	0.951	8	1	1	1	1	2.43
Master Protein Candidate	A0A1I9LRK5	DnaJ (DUF3353) OS=Arabidopsis thaliana OX=3702 GN=At3g51140 PE=1 SV=1	0.052	0.951	10	1	1	1	1	2.43
Master Protein	Q8VX13	Protein disulfide isomerase-like 1-3 OS=Arabidopsis thaliana OX=3702 GN=PDIL1-3 PE=2 SV=1	0.053	0.946	3	1	1	1	1	1.86
Master Protein	Q8L5Y4	P-loop containing nucleoside triphosphate hydrolases superfamily protein OS=Arabidopsis thaliana OX=3702 GN=EMB2765 PE=1 SV=1	0.052	0.942	1	1	1	1	1	0
Master Protein Candidate	F4JX83	Tetratricopeptide repeat (TPR)-like superfamily protein OS=Arabidopsis thaliana OX=3702 GN=MNC6.3 PE=4 SV=1	0.052	0.936	5	1	1	1	1	0
Master Protein Candidate	P81760	Thylakoid lumenal 17.4 kDa protein, chloroplastic OS=Arabidopsis thaliana OX=3702 GN=TL17 PE=1 SV=2	0.052	0.936	6	1	1	1	1	0
Master Protein	A0A1P8BAQ0	Tetratricopeptide repeat (TPR)-like superfamily protein OS=Arabidopsis thaliana OX=3702 GN=MNC6.3 PE=4 SV=1	0.052	0.936	5	1	1	1	1	0
None	A0A1I9LNF1	Glutamate dehydrogenase OS=Arabidopsis thaliana OX=3702 GN=GDH3 PE=3 SV=1	0.052	0.924	2	1	2	1	1	0
None	Q9S7A0	Probable glutamate dehydrogenase 3 OS=Arabidopsis thaliana OX=3702 GN=GSH3 PE=3 SV=1	0.052	0.924	2	1	2	1	1	0
None	Q9SU80	Alkaline-phosphatase-like family protein OS=Arabidopsis thaliana OX=3702 GN=At4g29710 PE=4 SV=1	0.052	0.924	5	1	2	1	1	0
Master Protein Candidate	P92529	Uncharacterized mitochondrial protein AtMg00920 OS=Arabidopsis thaliana OX=3702 GN=AtMg00920 PE=2 SV=1	0.052	0.915	6	1	1	1	1	2.41
Master Protein	Q27GM2	Uncharacterized protein OS=Arabidopsis thaliana OX=3702 GN=At2g07678 PE=4 SV=1	0.052	0.915	5	1	1	1	1	2.41
Master Protein	Q9FT52	ATP synthase subunit d, mitochondrial OS=Arabidopsis thaliana OX=3702 GN=At3g52300 PE=1 SV=3	0.053	0.914	7	1	1	1	1	2.4
Master Protein Candidate	Q2V3P9	ATP synthase D chain OS=Arabidopsis thaliana OX=3702 GN=ATPQ PE=1 SV=1	0.053	0.914	10	1	1	1	1	2.4
Master Protein Candidate	Q8VYC5	Ketose-bisphosphate aldolase class-II family protein OS=Arabidopsis thaliana OX=3702 GN=At1g18270 PE=2 SV=1	0.053	0.885	1	1	1	1	1	2.53
Master Protein Candidate	A0A1P8AVD8	Ketose-bisphosphate aldolase class-II family protein OS=Arabidopsis thaliana OX=3702 GN=At1g18270 PE=4 SV=1	0.053	0.885	1	1	1	1	1	2.53
Master Protein	F4IAP5	Ketose-bisphosphate aldolase class-II family protein OS=Arabidopsis thaliana OX=3702 GN=At1g18270 PE=4 SV=1	0.053	0.885	1	1	1	1	1	2.53
Master Protein Candidate	B3H739	Ketose-bisphosphate aldolase class-II family protein OS=Arabidopsis thaliana OX=3702 GN=At1g18270 PE=4 SV=1	0.053	0.885	1	1	1	1	1	2.53
Master Protein Candidate	F4IWV2	2-oxoglutarate dehydrogenase, E1 component OS=Arabidopsis thaliana OX=3702 GN=At3g55410 PE=1 SV=1	0.054	0.858	1	1	1	1	1	0
Master Protein	Q9FLH2	2-oxoglutarate dehydrogenase, E1 component OS=Arabidopsis thaliana OX=3702 GN=MPA24.10 PE=2 SV=1	0.054	0.858	1	1	1	1	1	0
Master Protein Candidate	F4I2H1	Protein kinase superfamily protein OS=Arabidopsis thaliana OX=3702 GN=At1g03740 PE=4 SV=1	0.057	0.838	2	1	1	1	1	0
Master Protein	Q9LR53	F21B7.34 OS=Arabidopsis thaliana OX=3702 GN=At1g03740 PE=2 SV=1	0.057	0.838	2	1	1	1	1	0
Master Protein	A0A1R7T3A2	Sulfate adenylyltransferase subunit OS=Arabidopsis thaliana OX=3702 GN=At5g20130 PE=4 SV=1	0.058	0.831	9	1	1	1	1	0
Master Protein Candidate	Q8LAF9	At5g20130 OS=Arabidopsis thaliana OX=3702 GN=At5g20130 PE=2 SV=1	0.058	0.831	10	1	1	1	1	0
Master Protein Candidate	A0A178WFD1	Indeterminate(ID)-domain 16 OS=Arabidopsis thaliana OX=3702 GN=IDD16 PE=4 SV=1	0.058	0.823	5	1	1	1	1	0
Master Protein	Q9FRH4	Protein indeterminate-domain 16 OS=Arabidopsis thaliana OX=3702 GN=IDD16 PE=2 SV=1	0.058	0.823	4	1	1	1	1	0
Master Protein	O65607	DNA mismatch repair protein MSH3 OS=Arabidopsis thaliana OX=3702 GN=MSH3 PE=1 SV=2	0.058	0.812	2	1	1	1	1	0
Master Protein	Q94AR8	3-isopropylmalate dehydratase large subunit, chloroplastic OS=Arabidopsis thaliana OX=3702 GN=IIL1 PE=1 SV=1	0.058	0.812	3	1	1	1	1	0
Master Protein	Q96529	Adenylosuccinate synthetase, chloroplastic OS=Arabidopsis thaliana OX=3702 GN=PURA PE=1 SV=1	0.058	0.81	3	1	2	1	1	0

## Sheet: Table S2-3
Table S2-3. List of Arabidopsis thaliana proteins identified in the experiment after protein isolation with phenol
Protein FDR Confidence: Combined	Master	Accession	Description	Exp. q-value: Combined	Sum PEP Score	Coverage [%]	# Peptides	# PSMs	# Unique Peptides	# Protein Groups	# AAs	MW [kDa]	calc. pI	Score Sequest HT: Sequest HT	# Peptides (by Search Engine): Sequest HT	# Razor Peptides
High	Master Protein	O03042	Ribulose bisphosphate carboxylase large chain OS=Arabidopsis thaliana OX=3702 GN=rbcL PE=1 SV=1	0	172.204	46	27	63	27	1	479	52.9	6.29	168.67	27	0
High	Master Protein	P19366	ATP synthase subunit beta, chloroplastic OS=Arabidopsis thaliana OX=3702 GN=atpB PE=1 SV=2	0	162.602	61	23	44	22	1	498	53.9	5.5	146.98	23	1
High	Master Protein	Q9LD57	Phosphoglycerate kinase 1, chloroplastic OS=Arabidopsis thaliana OX=3702 GN=PGK1 PE=1 SV=1	0	86.027	45	18	28	9	1	481	50.1	6.24	82.89	18	9
High	Master Protein	P10896	Ribulose bisphosphate carboxylase/oxygenase activase, chloroplastic OS=Arabidopsis thaliana OX=3702 GN=RCA PE=1 SV=2	0	83.16	38	15	23	15	1	474	51.9	6.15	77.99	15	0
High	None	F4IVZ7	Rubisco activase OS=Arabidopsis thaliana OX=3702 GN=RCA PE=1 SV=1	0	76.507	35	14	22	14	1	441	48.5	7.69	72.33	14	0
High	Master Protein	P56757	ATP synthase subunit alpha, chloroplastic OS=Arabidopsis thaliana OX=3702 GN=atpA PE=1 SV=1	0	75.857	34	15	23	14	1	507	55.3	5.25	67.08	15	2
High	Master Protein Candidate	P83484	ATP synthase subunit beta-2, mitochondrial OS=Arabidopsis thaliana OX=3702 GN=At5g08690 PE=1 SV=1	0	75.73	38	15	20	14	1	556	59.7	6.62	70.64	15	0
High	Master Protein	Q9C5A9	ATP synthase subunit beta-3, mitochondrial OS=Arabidopsis thaliana OX=3702 GN=At5g08680 PE=1 SV=1	0	75.73	38	15	20	14	1	559	59.8	6.49	70.64	15	0
High	Master Protein Candidate	P83483	ATP synthase subunit beta-1, mitochondrial OS=Arabidopsis thaliana OX=3702 GN=At5g08670 PE=1 SV=1	0	75.73	38	15	20	14	1	556	59.6	6.62	70.64	15	0
High	Master Protein	P42737	Beta carbonic anhydrase 2, chloroplastic OS=Arabidopsis thaliana OX=3702 GN=BCA2 PE=1 SV=3	0	73.289	54	13	20	6	1	331	36.6	7.4	60.48	13	0
High	Master Protein	P56777	Photosystem II CP47 reaction center protein OS=Arabidopsis thaliana OX=3702 GN=psbB PE=1 SV=1	0	73.261	26	12	18	12	1	508	56	6.89	67.83	12	0
High	Master Protein Candidate	Q42547	Catalase-3 OS=Arabidopsis thaliana OX=3702 GN=CAT3 PE=1 SV=3	0	70.9	41	15	22	11	1	492	56.7	7.64	61.83	15	0
High	Master Protein Candidate	B9DG18	AT1G20620 protein OS=Arabidopsis thaliana OX=3702 GN=CAT3 PE=1 SV=1	0	70.9	42	15	22	11	1	485	55.9	7.64	61.83	15	0
High	Master Protein	A0A1P8AWT7	Catalase 3 OS=Arabidopsis thaliana OX=3702 GN=CAT3 PE=1 SV=1	0	70.9	37	15	22	11	1	551	63.5	8.9	61.83	15	4
High	Master Protein	P38418	Lipoxygenase 2, chloroplastic OS=Arabidopsis thaliana OX=3702 GN=LOX2 PE=1 SV=1	0	70.102	26	19	24	19	1	896	102	5.62	64.48	19	0
High	Master Protein	P27140	Beta carbonic anhydrase 1, chloroplastic OS=Arabidopsis thaliana OX=3702 GN=BCA1 PE=1 SV=2	0	69.826	48	14	21	7	1	347	37.4	5.99	68.18	14	9
High	None	A8MQY4	Carbonic anhydrase OS=Arabidopsis thaliana OX=3702 GN=CA2 PE=1 SV=1	0	69.115	52	12	19	6	1	310	34.4	7.9	56.64	12	0
High	None	F4K875	Carbonic anhydrase OS=Arabidopsis thaliana OX=3702 GN=CA2 PE=1 SV=1	0	69.115	49	12	19	6	1	330	36.5	7.64	56.64	12	0
High	None	F4K873	Carbonic anhydrase OS=Arabidopsis thaliana OX=3702 GN=CA2 PE=1 SV=1	0	69.115	49	12	19	6	1	330	36.5	7.64	56.64	12	0
High	None	A0A1I9LQB3	Carbonic anhydrase OS=Arabidopsis thaliana OX=3702 GN=CA1 PE=1 SV=1	0	68.426	61	13	20	6	1	259	28.2	5.4	65.65	13	0
High	None	F4HUL6	Catalase 3 OS=Arabidopsis thaliana OX=3702 GN=CAT3 PE=1 SV=1	0	66.427	44	13	20	10	1	427	48.9	6.8	56.08	13	0
High	None	Q2V4M4	Catalase 3 OS=Arabidopsis thaliana OX=3702 GN=CAT3 PE=1 SV=3	0	65.179	47	13	20	10	1	377	43.9	7.61	54.45	13	0
High	Master Protein	Q8RWV0	Transketolase-1, chloroplastic OS=Arabidopsis thaliana OX=3702 GN=TKL-1 PE=1 SV=1	0	62.749	25	14	17	14	1	741	79.9	6.37	52.67	14	0
High	Master Protein Candidate	F4JBY2	Transketolase OS=Arabidopsis thaliana OX=3702 GN=AtTKL1 PE=1 SV=1	0	62.749	25	14	17	14	1	740	79.8	6.43	52.67	14	0
High	None	A0A1I9LPH1	Lipoxygenase OS=Arabidopsis thaliana OX=3702 GN=LOX2 PE=3 SV=1	0	61.883	26	16	21	16	1	754	85.9	5.5	56.15	16	0
High	Master Protein Candidate	Q9FX54	Glyceraldehyde-3-phosphate dehydrogenase GAPC2, cytosolic OS=Arabidopsis thaliana OX=3702 GN=GAPC2 PE=1 SV=1	0	61.87	48	12	17	12	1	338	36.9	7.18	44.89	12	0
High	Master Protein	P25858	Glyceraldehyde-3-phosphate dehydrogenase GAPC1, cytosolic OS=Arabidopsis thaliana OX=3702 GN=GAPC1 PE=1 SV=2	0	61.87	48	12	17	12	1	338	36.9	7.12	44.89	12	0
High	Master Protein	Q9LJG3	GDSL esterase/lipase ESM1 OS=Arabidopsis thaliana OX=3702 GN=ESM1 PE=1 SV=1	0	61.272	34	9	15	9	1	392	44	7.72	58.27	9	0
High	None	A0A1P8AWR0	Catalase 3 OS=Arabidopsis thaliana OX=3702 GN=CAT3 PE=1 SV=1	0	57.258	48	10	17	8	1	310	35.9	6.3	45.78	10	0
High	Master Protein	Q944G9	Fructose-bisphosphate aldolase 2, chloroplastic OS=Arabidopsis thaliana OX=3702 GN=FBA2 PE=1 SV=2	0	57.198	35	9	13	7	1	398	43	7.24	50.58	9	3
High	Master Protein	P17745	Elongation factor Tu, chloroplastic OS=Arabidopsis thaliana OX=3702 GN=TUFA PE=1 SV=1	0	53.122	23	9	15	8	1	476	51.6	6.19	48.4	9	1
High	Master Protein	Q9SE50	Beta-D-glucopyranosyl abscisate beta-glucosidase OS=Arabidopsis thaliana OX=3702 GN=BGLU18 PE=1 SV=2	0	52.401	28	11	15	11	1	528	60.4	7.21	47.59	11	0
High	None	A0A1I9LQL1	GDSL-like lipase/acylhydrolase superfamily protein OS=Arabidopsis thaliana OX=3702 GN=ESM1 PE=4 SV=1	0	52.311	36	7	13	7	1	264	30.3	8.54	49.22	7	0
High	None	F4JUJ5	Fructose-bisphosphate aldolase OS=Arabidopsis thaliana OX=3702 GN=FBA2 PE=1 SV=1	0	51.985	32	8	12	6	1	381	41.3	8.94	46.17	8	0
High	Master Protein	P25856	Glyceraldehyde-3-phosphate dehydrogenase GAPA1, chloroplastic OS=Arabidopsis thaliana OX=3702 GN=GAPA1 PE=1 SV=3	0	51.46	33	12	14	4	1	396	42.5	7.75	49.3	12	8
High	Master Protein Candidate	Q9STX5	Endoplasmin homolog OS=Arabidopsis thaliana OX=3702 GN=HSP90-7 PE=1 SV=1	0	49.258	12	8	12	8	1	823	94.1	5.03	39.78	8	0
High	Master Protein	F4JQ55	Chaperone protein htpG family protein OS=Arabidopsis thaliana OX=3702 GN=SHD PE=1 SV=1	0	49.258	12	8	12	8	1	823	94.1	5.01	39.78	8	0
High	Master Protein	A0A1P8APR6	Glyceraldehyde-3-phosphate dehydrogenase OS=Arabidopsis thaliana OX=3702 GN=GAPA-2 PE=3 SV=1	0	46.967	28	10	12	2	1	441	47.6	8.25	42.66	10	0
High	Master Protein Candidate	Q9LPW0	Glyceraldehyde-3-phosphate dehydrogenase GAPA2, chloroplastic OS=Arabidopsis thaliana OX=3702 GN=GAPA2 PE=2 SV=1	0	46.967	31	10	12	2	1	399	42.8	8.05	42.66	10	0
High	Master Protein	Q9ASR1	Elongation factor 2 OS=Arabidopsis thaliana OX=3702 GN=LOS1 PE=1 SV=1	0	46.714	18	12	16	12	1	843	93.8	6.25	34.33	12	0
High	Master Protein	P56761	Photosystem II D2 protein OS=Arabidopsis thaliana OX=3702 GN=psbD PE=1 SV=3	0	46.402	24	7	12	7	1	353	39.5	5.74	47.41	7	0
High	Master Protein	O65719	Heat shock 70 kDa protein 3 OS=Arabidopsis thaliana OX=3702 GN=HSP70-3 PE=1 SV=1	0	46.252	22	11	12	2	1	649	71.1	5.07	38.9	11	0
High	Master Protein	P50318	Phosphoglycerate kinase 2, chloroplastic OS=Arabidopsis thaliana OX=3702 GN=At1g56190 PE=1 SV=3	0	44.592	28	11	14	1	1	478	49.9	8.27	43.11	11	1
High	Master Protein Candidate	F4I3L1	Phosphoglycerate kinase OS=Arabidopsis thaliana OX=3702 GN=At1g56190 PE=1 SV=1	0	44.592	33	11	14	1	1	405	42.6	5.54	43.11	11	0
High	Master Protein	Q9SUR6	Cystine lyase CORI3 OS=Arabidopsis thaliana OX=3702 GN=CORI3 PE=1 SV=1	0	44.349	33	11	13	11	1	422	47	6.28	39.34	11	0
High	Master Protein	P37702	Myrosinase 1 OS=Arabidopsis thaliana OX=3702 GN=TGG1 PE=1 SV=1	0	43.871	29	13	15	13	1	541	61.1	5.92	42.36	13	0
High	Master Protein	P25697	Phosphoribulokinase, chloroplastic OS=Arabidopsis thaliana OX=3702 GN=At1g32060 PE=1 SV=1	0	43.342	32	9	13	9	1	395	44.4	6.05	38.74	9	0
High	None	F4HQT1	Glyceraldehyde-3-phosphate dehydrogenase C2 OS=Arabidopsis thaliana OX=3702 GN=GAPC2 PE=1 SV=1	0	43.31	35	9	12	9	1	310	33.9	7.21	32.54	9	0
High	Master Protein	O23654	V-type proton ATPase catalytic subunit A OS=Arabidopsis thaliana OX=3702 GN=VHA-A PE=1 SV=1	0	43.065	28	14	15	14	1	623	68.8	5.24	42.17	14	0
High	Master Protein	P32961	Nitrilase 1 OS=Arabidopsis thaliana OX=3702 GN=NIT1 PE=1 SV=2	0	41.372	36	9	12	5	1	346	38.1	6.28	34.31	9	5
High	Master Protein	O50008	5-methyltetrahydropteroyltriglutamate--homocysteine methyltransferase 1 OS=Arabidopsis thaliana OX=3702 GN=MS1 PE=1 SV=1	0	40.25	18	11	12	3	1	765	84.3	6.51	39.79	11	8
High	Master Protein Candidate	F4IGL5	Fructose-bisphosphate aldolase OS=Arabidopsis thaliana OX=3702 GN=FBA1 PE=3 SV=1	0	40.017	29	7	9	5	1	389	41.8	6.28	33.65	7	0
High	Master Protein	Q9SJU4	Fructose-bisphosphate aldolase 1, chloroplastic OS=Arabidopsis thaliana OX=3702 GN=FBA1 PE=1 SV=2	0	40.017	28	7	9	5	1	399	42.9	6.58	33.65	7	0
High	Master Protein Candidate	F4KCE5	Heat shock cognate protein 70-1 OS=Arabidopsis thaliana OX=3702 GN=HSC70-1 PE=1 SV=1	0	39.841	25	11	12	2	1	521	57.2	5.1	35.89	11	0
High	Master Protein	P22953	Probable mediator of RNA polymerase II transcription subunit 37e OS=Arabidopsis thaliana OX=3702 GN=MED37E PE=1 SV=3	0	39.841	20	11	12	2	1	651	71.3	5.12	35.89	11	9
High	Master Protein	P0DH99	Elongation factor 1-alpha 1 OS=Arabidopsis thaliana OX=3702 GN=A1 PE=1 SV=1	0	39.69	18	6	11	6	1	449	49.5	9.11	33.77	6	0
High	Master Protein	Q9ZNZ7	Ferredoxin-dependent glutamate synthase 1, chloroplastic/mitochondrial OS=Arabidopsis thaliana OX=3702 GN=GLU1 PE=1 SV=3	0	39.12	8	10	11	8	1	1622	176.6	6.32	31.44	10	1
High	Master Protein Candidate	A0A1P8B9N1	Formate dehydrogenase, mitochondrial OS=Arabidopsis thaliana OX=3702 GN=FDH PE=3 SV=1	0	38.587	39	11	11	11	1	358	39.6	6.62	25.62	11	0
High	Master Protein Candidate	A0A1P8B9L1	Formate dehydrogenase, mitochondrial OS=Arabidopsis thaliana OX=3702 GN=FDH PE=3 SV=1	0	38.587	38	11	11	11	1	370	41	6.62	25.62	11	0
High	Master Protein	Q9S7E4	Formate dehydrogenase, chloroplastic/mitochondrial OS=Arabidopsis thaliana OX=3702 GN=FDH1 PE=1 SV=1	0	38.587	36	11	11	11	1	384	42.4	7.5	25.62	11	0
High	None	F4IGL7	Fructose-bisphosphate aldolase OS=Arabidopsis thaliana OX=3702 GN=FBA1 PE=3 SV=1	0	38.254	33	6	8	4	1	311	33.3	6.8	30.51	6	0
High	Master Protein	P56778	Photosystem II CP43 reaction center protein OS=Arabidopsis thaliana OX=3702 GN=psbC PE=1 SV=3	0	38.043	23	7	12	7	1	473	51.8	7.2	40.29	7	0
High	Master Protein	Q38882	Phospholipase D alpha 1 OS=Arabidopsis thaliana OX=3702 GN=PLDALPHA1 PE=1 SV=2	0	37.862	13	7	11	7	1	810	91.8	5.87	30.94	7	0
High	Master Protein	P10795	Ribulose bisphosphate carboxylase small chain 1A, chloroplastic OS=Arabidopsis thaliana OX=3702 GN=RBCS-1A PE=1 SV=2	0	37.47	39	8	14	5	1	180	20.2	7.71	30.79	8	0
High	Master Protein	P25857	Glyceraldehyde-3-phosphate dehydrogenase GAPB, chloroplastic OS=Arabidopsis thaliana OX=3702 GN=GAPB PE=1 SV=2	0	37.162	29	11	12	10	1	447	47.6	6.8	36.99	11	0
High	Master Protein	P23321	Oxygen-evolving enhancer protein 1-1, chloroplastic OS=Arabidopsis thaliana OX=3702 GN=PSBO1 PE=1 SV=2	0	36.716	39	12	13	12	1	332	35.1	5.66	35.64	12	0
High	Master Protein Candidate	P10797	Ribulose bisphosphate carboxylase small chain 2B, chloroplastic OS=Arabidopsis thaliana OX=3702 GN=RBCS-2B PE=2 SV=2	0	36.42	40	8	13	4	1	181	20.3	7.71	32.59	8	0
High	Master Protein Candidate	F4KA76	Ribulose bisphosphate carboxylase small chain OS=Arabidopsis thaliana OX=3702 GN=RBCS3B PE=3 SV=1	0	36.42	41	8	13	4	1	174	19.4	8.03	32.59	8	0
High	Master Protein	B3H5S2	Ribulose bisphosphate carboxylase small chain OS=Arabidopsis thaliana OX=3702 GN=RBCS3B PE=3 SV=1	0	36.42	39	8	13	4	1	186	20.8	8.29	32.59	8	5
High	Master Protein Candidate	P10798	Ribulose bisphosphate carboxylase small chain 3B, chloroplastic OS=Arabidopsis thaliana OX=3702 GN=RBCS-3B PE=2 SV=2	0	36.42	40	8	13	4	1	181	20.3	8.05	32.59	8	0
High	Master Protein	A0A1P8ATL2	Chloroplast RNA binding protein OS=Arabidopsis thaliana OX=3702 GN=CRB PE=4 SV=1	0	36.295	36	11	13	11	1	379	43.2	7.12	29.42	11	0
High	Master Protein Candidate	Q9SA52	Chloroplast stem-loop binding protein of 41 kDa b, chloroplastic OS=Arabidopsis thaliana OX=3702 GN=CSP41B PE=1 SV=1	0	36.295	36	11	13	11	1	378	42.6	8.16	29.42	11	0
High	None	F4HNZ6	Glyceraldehyde 3-phosphate dehydrogenase A subunit 2 OS=Arabidopsis thaliana OX=3702 GN=GAPA-2 PE=4 SV=1	0	36.155	26	8	10	0	2	317	34.3	6.64	33.97	8	0
High	Master Protein	P46422	Glutathione S-transferase F2 OS=Arabidopsis thaliana OX=3702 GN=GSTF2 PE=1 SV=3	0	35.909	50	10	14	8	1	212	24.1	6.35	35.37	10	2
High	Master Protein Candidate	Q42064	60S ribosomal protein L8-3 OS=Arabidopsis thaliana OX=3702 GN=RPL8C PE=2 SV=2	0	35.898	15	2	9	2	1	258	27.9	10.83	10.73	2	0
High	Master Protein	P46286	60S ribosomal protein L8-1 OS=Arabidopsis thaliana OX=3702 GN=RPL8A PE=1 SV=2	0	35.898	15	2	9	2	1	258	27.8	10.9	10.73	2	0
High	Master Protein Rejected	P22954	Probable mediator of RNA polymerase II transcription subunit 37c OS=Arabidopsis thaliana OX=3702 GN=MED37D PE=1 SV=2	0	35.399	18	9	10	0	0	653	71.3	5.12	31.77	9	0
High	Master Protein Candidate Rejected	Q9LHA8	Probable mediator of RNA polymerase II transcription subunit 37c OS=Arabidopsis thaliana OX=3702 GN=MED37C PE=1 SV=1	0	35.399	18	9	10	0	0	650	71.1	5.25	31.77	9	0
High	Master Protein	A0A2H1ZEA9	Aminomethyltransferase OS=Arabidopsis thaliana OX=3702 GN=At1g11860 PE=3 SV=1	0	35.272	24	9	13	9	1	423	46.3	8.75	22.8	9	0
High	Master Protein Candidate	O65396	Aminomethyltransferase, mitochondrial OS=Arabidopsis thaliana OX=3702 GN=GDCST PE=2 SV=1	0	35.272	25	9	13	9	1	408	44.4	8.37	22.8	9	0
High	Master Protein	Q9LKR3	Mediator of RNA polymerase II transcription subunit 37a OS=Arabidopsis thaliana OX=3702 GN=MED37A PE=1 SV=1	0	35	16	8	9	6	1	669	73.6	5.17	28.1	8	0
High	None	F4JP99	Tyrosine transaminase family protein OS=Arabidopsis thaliana OX=3702 GN=CORI3 PE=4 SV=1	0	34.741	32	9	11	9	1	380	42.2	5.74	32.02	9	0
High	None	P93292	Putative uncharacterized mitochondrial protein AtMg00280 OS=Arabidopsis thaliana OX=3702 GN=AtMg00280 PE=5 SV=1	0	34.63	26	3	10	3	1	110	12.7	8.95	34.38	3	0
High	None	Q9C7X7	Heat shock 70 kDa protein 18 OS=Arabidopsis thaliana OX=3702 GN=HSP70-18 PE=2 SV=1	0	32.913	18	8	9	0	0	617	68.3	5.35	28.45	8	0
High	Master Protein	Q05431	L-ascorbate peroxidase 1, cytosolic OS=Arabidopsis thaliana OX=3702 GN=APX1 PE=1 SV=2	0	32.842	40	6	9	6	1	250	27.5	6.13	22.5	6	0
High	Master Protein Candidate	F4HU93	Ascorbate peroxidase 1 OS=Arabidopsis thaliana OX=3702 GN=APX1 PE=1 SV=1	0	32.842	41	6	9	6	1	249	27.5	6.29	22.5	6	0
High	Master Protein	O80852	Glutathione S-transferase F9 OS=Arabidopsis thaliana OX=3702 GN=GSTF9 PE=1 SV=1	0	32.251	32	6	9	6	1	215	24.1	6.65	17.38	6	0
High	Master Protein	P56767	Photosystem I P700 chlorophyll a apoprotein A2 OS=Arabidopsis thaliana OX=3702 GN=psaB PE=3 SV=1	0	32.051	14	9	13	9	1	734	82.4	7.4	30.71	9	0
High	Master Protein	Q9FN48	Calcium sensing receptor, chloroplastic OS=Arabidopsis thaliana OX=3702 GN=CAS PE=1 SV=1	0	30.745	33	9	9	9	1	387	41.3	9.39	30.41	9	0
High	Master Protein	Q9SMU8	Peroxidase 34 OS=Arabidopsis thaliana OX=3702 GN=PER34 PE=1 SV=1	0	30.678	23	6	8	6	1	353	38.8	7.64	26.85	6	0
High	Master Protein	Q9XF88	Chlorophyll a-b binding protein CP29.2, chloroplastic OS=Arabidopsis thaliana OX=3702 GN=LHCB4.2 PE=1 SV=1	0	30.392	25	7	11	5	1	287	31.2	6.24	33.74	7	2
High	None	Q4PSL7	60S ribosomal protein L8-2 OS=Arabidopsis thaliana OX=3702 GN=RPL8B PE=2 SV=3	0	30.211	10	1	7	1	1	260	28	10.54	7.09	1	0
High	None	A0A1P8BF32	Heat shock protein 70 (Hsp 70) family protein OS=Arabidopsis thaliana OX=3702 GN=BIP2 PE=1 SV=1	0	29.917	13	7	8	5	1	673	74.3	5.19	23.28	7	0
High	None	Q39043	Mediator of RNA polymerase II transcription subunit 37f OS=Arabidopsis thaliana OX=3702 GN=MED37F PE=1 SV=2	0	29.917	13	7	8	5	1	668	73.5	5.21	23.28	7	0
High	None	F4K007	Heat shock protein 70 (Hsp 70) family protein OS=Arabidopsis thaliana OX=3702 GN=BIP2 PE=1 SV=1	0	29.917	14	7	8	5	1	613	67.4	5.29	23.28	7	0
High	Master Protein	Q9LF98	Fructose-bisphosphate aldolase 8, cytosolic OS=Arabidopsis thaliana OX=3702 GN=FBA8 PE=1 SV=1	0	29.795	28	8	9	4	1	358	38.5	6.46	21.74	8	4
High	Master Protein	Q9SJQ9	Fructose-bisphosphate aldolase 6, cytosolic OS=Arabidopsis thaliana OX=3702 GN=FBA6 PE=1 SV=1	0	29.562	28	7	8	3	1	358	38.4	7.39	23.42	7	0
High	Master Protein	P28493	Pathogenesis-related protein 5 OS=Arabidopsis thaliana OX=3702 GN=At1g75040 PE=1 SV=1	0	29.503	32	5	7	5	1	239	25.2	4.98	24.74	5	0
High	None	F4HRR5	Ribulose bisphosphate carboxylase small chain OS=Arabidopsis thaliana OX=3702 GN=RBCS1A PE=1 SV=1	0	28.59	19	4	7	3	1	136	14.5	6.02	17.82	4	0
High	Master Protein	P10796	Ribulose bisphosphate carboxylase small chain 1B, chloroplastic OS=Arabidopsis thaliana OX=3702 GN=RBCS-1B PE=1 SV=1	0	28.24	40	8	11	4	1	181	20.3	7.71	26.85	8	0
High	Master Protein	Q9SHE8	Photosystem I reaction center subunit III, chloroplastic OS=Arabidopsis thaliana OX=3702 GN=PSAF PE=1 SV=1	0	28.006	36	6	7	6	1	221	24.2	9.54	22.94	6	0
High	Master Protein Candidate	B3H4B8	Aldolase-type TIM barrel family protein OS=Arabidopsis thaliana OX=3702 GN=GOX1 PE=3 SV=1	0	27.874	31	10	11	5	1	366	40.3	9.35	21.72	10	0
High	Master Protein	Q9LRR9	(S)-2-hydroxy-acid oxidase GLO1 OS=Arabidopsis thaliana OX=3702 GN=GLO1 PE=1 SV=1	0	27.874	31	10	11	5	1	367	40.3	9.13	21.72	10	5
High	Master Protein Candidate	A8MS37	Aldolase-type TIM barrel family protein OS=Arabidopsis thaliana OX=3702 GN=GOX1 PE=3 SV=1	0	27.874	32	10	11	5	1	360	39.4	9.5	21.72	10	0
High	Master Protein	Q9SRV5	5-methyltetrahydropteroyltriglutamate--homocysteine methyltransferase 2 OS=Arabidopsis thaliana OX=3702 GN=MS2 PE=1 SV=1	0	26.926	13	9	9	1	1	765	84.5	6.51	25.88	9	0
High	Master Protein	Q96242	Allene oxide synthase, chloroplastic OS=Arabidopsis thaliana OX=3702 GN=CYP74A PE=1 SV=3	0	26.782	17	6	7	6	1	518	58.2	8.66	22.01	6	0
High	Master Protein	Q9SAJ4	Phosphoglycerate kinase 3, cytosolic OS=Arabidopsis thaliana OX=3702 GN=PGK3 PE=1 SV=1	0	26.515	21	6	7	4	1	401	42.1	5.68	23.56	6	0
High	Master Protein	P25851	Fructose-1,6-bisphosphatase 1, chloroplastic OS=Arabidopsis thaliana OX=3702 GN=CFBP1 PE=1 SV=2	0	26.207	22	6	8	6	1	417	45.1	5.4	15.7	6	0
High	Master Protein	Q43127	Glutamine synthetase, chloroplastic/mitochondrial OS=Arabidopsis thaliana OX=3702 GN=GLN2 PE=1 SV=1	0	26.032	15	5	8	5	1	430	47.4	6.87	25.41	5	0
High	Master Protein	Q94B78	Glycine dehydrogenase (decarboxylating) 1, mitochondrial OS=Arabidopsis thaliana OX=3702 GN=GLDP1 PE=1 SV=2	0	25.642	10	7	7	7	1	1037	112.9	6.98	20.5	7	0
High	Master Protein	Q9SKP6	Triosephosphate isomerase, chloroplastic OS=Arabidopsis thaliana OX=3702 GN=TIM PE=1 SV=1	0	25.541	23	8	10	7	1	315	33.3	7.83	22.41	8	1
High	Master Protein Candidate	Q9SA56	Photosystem I reaction center subunit II-2, chloroplastic OS=Arabidopsis thaliana OX=3702 GN=PSAD2 PE=1 SV=1	0	25.521	33	4	7	4	1	204	22.3	9.77	30.83	4	0
High	Master Protein	Q9S7H1	Photosystem I reaction center subunit II-1, chloroplastic OS=Arabidopsis thaliana OX=3702 GN=psaD1 PE=1 SV=1	0	25.521	32	4	7	4	1	208	22.6	9.77	30.83	4	0
High	Master Protein Candidate	F4IX28	Peptidyl-prolyl cis-trans isomerase OS=Arabidopsis thaliana OX=3702 GN=ROC4 PE=3 SV=1	0	25.269	27	5	8	5	1	259	28.1	8.75	26.03	5	0
High	Master Protein Candidate	P34791	Peptidyl-prolyl cis-trans isomerase CYP20-3, chloroplastic OS=Arabidopsis thaliana OX=3702 GN=CYP20-3 PE=1 SV=1	0	25.269	27	5	8	5	1	260	28.2	8.59	26.03	5	0
High	Master Protein	F4IX26	Rotamase CYP 4 OS=Arabidopsis thaliana OX=3702 GN=ROC4 PE=4 SV=1	0	25.269	23	5	8	5	1	313	34.3	9.1	26.03	5	0
High	Master Protein	Q9XFT3	Oxygen-evolving enhancer protein 3-1, chloroplastic OS=Arabidopsis thaliana OX=3702 GN=PSBQ1 PE=1 SV=3	0	25.171	31	7	8	5	1	224	23.9	9.64	22.97	7	2
High	Master Protein	P93819	Malate dehydrogenase 1, cytoplasmic OS=Arabidopsis thaliana OX=3702 GN=MDH1 PE=1 SV=2	0	25.135	28	7	8	7	1	332	35.5	6.55	23.56	7	0
High	Master Protein	P83755	Photosystem II protein D1 OS=Arabidopsis thaliana OX=3702 GN=psbA PE=1 SV=2	0	25.094	20	6	12	6	1	353	38.9	5.25	22.23	6	0
High	None	Q9S841	Oxygen-evolving enhancer protein 1-2, chloroplastic OS=Arabidopsis thaliana OX=3702 GN=PSBO2 PE=1 SV=1	0	24.872	28	9	9	9	1	331	35	6.16	28.29	9	0
High	None	F4HUA0	GTP binding Elongation factor Tu family protein OS=Arabidopsis thaliana OX=3702 GN=At1g07930 PE=1 SV=1	0	24.601	16	5	7	5	1	372	41.3	9.23	21	5	0
High	Master Protein	Q9SIB9	Aconitate hydratase 3, mitochondrial OS=Arabidopsis thaliana OX=3702 GN=ACO3 PE=1 SV=2	0	24.421	7	5	7	4	1	990	108.1	7.17	20.6	5	1
High	Master Protein	Q9SYT0	Annexin D1 OS=Arabidopsis thaliana OX=3702 GN=ANN1 PE=1 SV=1	0	24.365	27	6	7	6	1	317	36.2	5.38	16.74	6	0
High	Master Protein	Q9C5C2	Myrosinase 2 OS=Arabidopsis thaliana OX=3702 GN=TGG2 PE=1 SV=1	0	24.264	14	7	11	7	1	547	62.7	7.44	18.36	7	0
High	Master Protein Candidate	F4I1C1	General regulatory factor 10 OS=Arabidopsis thaliana OX=3702 GN=GRF10 PE=3 SV=1	0	24.078	27	5	7	4	1	251	28.6	4.92	21.44	5	0
High	Master Protein	P48347	14-3-3-like protein GF14 epsilon OS=Arabidopsis thaliana OX=3702 GN=GRF10 PE=1 SV=1	0	24.078	27	5	7	4	1	254	28.9	4.81	21.44	5	0
High	Master Protein	P56771	Cytochrome f OS=Arabidopsis thaliana OX=3702 GN=petA PE=3 SV=1	0	23.98	30	8	8	8	1	320	35.3	8.29	25.98	8	0
High	Master Protein	P32962	Nitrilase 2 OS=Arabidopsis thaliana OX=3702 GN=NIT2 PE=1 SV=1	0	23.974	21	5	7	1	1	339	37.1	5.55	23.39	5	0
High	None	A8MRE8	Triosephosphate isomerase OS=Arabidopsis thaliana OX=3702 GN=TIM PE=1 SV=1	0	23.846	21	7	9	7	1	306	32.3	7.49	22.41	7	0
High	None	Q2V3V9	Aldolase-type TIM barrel family protein OS=Arabidopsis thaliana OX=3702 GN=GOX1 PE=3 SV=2	0	23.755	26	9	10	5	1	367	40.3	8.76	18.26	9	0
High	Master Protein	P31167	ADP,ATP carrier protein 1, mitochondrial OS=Arabidopsis thaliana OX=3702 GN=AAC1 PE=1 SV=2	0	23.484	17	7	9	7	1	381	41.4	9.83	23.65	7	0
High	Master Protein	P56766	Photosystem I P700 chlorophyll a apoprotein A1 OS=Arabidopsis thaliana OX=3702 GN=psaA PE=2 SV=1	0	23.22	9	6	10	6	1	750	83.2	7.11	17.26	6	0
High	Master Protein Candidate	Q9LU86	Peroxiredoxin Q, chloroplastic OS=Arabidopsis thaliana OX=3702 GN=PRXQ PE=1 SV=1	0	22.889	25	5	5	5	1	216	23.7	9.51	18.35	5	0
High	Master Protein	F4JBC9	Thioredoxin superfamily protein OS=Arabidopsis thaliana OX=3702 GN=PRXQ PE=4 SV=1	0	22.889	24	5	5	5	1	217	23.8	9.51	18.35	5	0
High	Master Protein Candidate	A0A1I9LR27	Thioredoxin superfamily protein OS=Arabidopsis thaliana OX=3702 GN=PRXQ PE=4 SV=1	0	22.889	34	5	5	5	1	154	17	9.14	18.35	5	0
High	None	B3H5Y8	Glycine cleavage system P protein OS=Arabidopsis thaliana OX=3702 GN=GLDP1 PE=3 SV=1	0	22.764	9	6	6	6	1	976	106.2	6.99	17.68	6	0
High	Master Protein	O49006	Pectinesterase/pectinesterase inhibitor 3 OS=Arabidopsis thaliana OX=3702 GN=PME3 PE=1 SV=2	0	22.673	13	5	6	5	1	592	64.2	8.87	19.57	5	0
High	Master Protein	Q9SY97	Photosystem I chlorophyll a/b-binding protein 3-1, chloroplastic OS=Arabidopsis thaliana OX=3702 GN=LHCA3 PE=1 SV=1	0	22.58	23	5	6	5	1	273	29.2	8.68	18.06	5	0
High	Master Protein	Q01908	ATP synthase gamma chain 1, chloroplastic OS=Arabidopsis thaliana OX=3702 GN=ATPC1 PE=1 SV=1	0	22.017	24	7	8	7	1	373	40.9	8	23.36	7	0
High	Master Protein	Q42029	Oxygen-evolving enhancer protein 2-1, chloroplastic OS=Arabidopsis thaliana OX=3702 GN=PSBP1 PE=1 SV=2	0	21.799	30	5	6	5	1	263	28.1	7.39	21.01	5	0
High	Master Protein	Q9XF89	Chlorophyll a-b binding protein CP26, chloroplastic OS=Arabidopsis thaliana OX=3702 GN=LHCB5 PE=1 SV=1	0	21.427	31	6	7	6	1	280	30.1	6.37	19.71	6	0
High	Master Protein	P53492	Actin-7 OS=Arabidopsis thaliana OX=3702 GN=ACT7 PE=1 SV=1	0	21.379	18	5	6	2	1	377	41.7	5.49	17.67	5	0
High	None	P24101	Peroxidase 33 OS=Arabidopsis thaliana OX=3702 GN=PER33 PE=1 SV=1	0	21.323	12	3	5	3	1	354	38.9	6.87	17.15	3	0
High	Master Protein	Q9M5K3	Dihydrolipoyl dehydrogenase 1, mitochondrial OS=Arabidopsis thaliana OX=3702 GN=LPD1 PE=1 SV=2	0	21.024	14	5	7	5	1	507	54	7.4	14.4	5	0
High	Master Protein Candidate	P82281	Thylakoid lumenal 29 kDa protein, chloroplastic OS=Arabidopsis thaliana OX=3702 GN=TL29 PE=1 SV=2	0	20.939	28	7	7	7	1	349	37.9	8.46	22.08	7	0
High	Master Protein	A0A1P8B8Y3	Ascorbate peroxidase 4 OS=Arabidopsis thaliana OX=3702 GN=TL29 PE=1 SV=1	0	20.939	24	7	7	7	1	396	43.4	7.84	22.08	7	0
High	Master Protein Candidate	A0A1P8B8W6	Ascorbate peroxidase 4 OS=Arabidopsis thaliana OX=3702 GN=TL29 PE=1 SV=1	0	20.939	34	7	7	7	1	284	31	6.83	22.08	7	0
High	Master Protein	Q07473	Chlorophyll a-b binding protein CP29.1, chloroplastic OS=Arabidopsis thaliana OX=3702 GN=LHCB4.1 PE=1 SV=1	0	20.889	20	5	7	3	1	290	31.1	6.14	23.45	5	0
High	Master Protein	Q9SRZ6	Cytosolic isocitrate dehydrogenase [NADP] OS=Arabidopsis thaliana OX=3702 GN=CICDH PE=1 SV=1	0	20.408	13	4	5	4	1	410	45.7	6.57	13.93	4	0
High	Master Protein	Q9FI56	Chaperone protein ClpC1, chloroplastic OS=Arabidopsis thaliana OX=3702 GN=CLPC1 PE=1 SV=1	0	20.347	7	6	6	6	1	929	103.4	6.77	16.63	6	0
High	Master Protein Candidate	P42643	14-3-3-like protein GF14 chi OS=Arabidopsis thaliana OX=3702 GN=GRF1 PE=1 SV=3	0	20.081	34	7	8	3	1	267	29.9	4.81	20.02	7	0
High	Master Protein	F4JJ94	General regulatory factor 1 OS=Arabidopsis thaliana OX=3702 GN=GRF1 PE=1 SV=1	0	20.081	29	7	8	3	1	318	35.8	4.77	20.02	7	4
High	Master Protein	A0A1I9LMG6	Beta-1,3-glucanase 2 OS=Arabidopsis thaliana OX=3702 GN=BGL2 PE=3 SV=1	0	19.863	22	5	5	5	1	355	39.4	5.71	19.44	5	0
High	Master Protein Candidate	P33157	Glucan endo-1,3-beta-glucosidase, acidic isoform OS=Arabidopsis thaliana OX=3702 GN=BG2 PE=1 SV=2	0	19.863	23	5	5	5	1	339	37.3	4.98	19.44	5	0
High	Master Protein	Q9STW6	Heat shock 70 kDa protein 6, chloroplastic OS=Arabidopsis thaliana OX=3702 GN=HSP70-6 PE=1 SV=1	0	19.726	11	7	7	7	1	718	76.5	5.2	21.08	7	0
High	Master Protein	F4JFV6	Aldolase-type TIM barrel family protein OS=Arabidopsis thaliana OX=3702 GN=GOX2 PE=3 SV=1	0	19.711	20	6	7	1	1	373	40.9	8.76	17.98	6	0
High	Master Protein Candidate	Q9LRS0	(S)-2-hydroxy-acid oxidase GLO2 OS=Arabidopsis thaliana OX=3702 GN=GLO2 PE=1 SV=1	0	19.711	20	6	7	1	1	367	40.3	8.97	17.98	6	0
High	Master Protein	Q9ZP06	Malate dehydrogenase 1, mitochondrial OS=Arabidopsis thaliana OX=3702 GN=At1g53240 PE=1 SV=1	0	19.639	14	3	4	3	1	341	35.8	8.35	15.88	3	0
High	Master Protein Candidate	Q03509	Calmodulin-6 OS=Arabidopsis thaliana OX=3702 GN=CAM6 PE=1 SV=2	0	19.521	44	5	5	5	1	149	16.8	4.27	17.21	5	0
High	Master Protein	A0A1I9LPJ2	Calmodulin 7 OS=Arabidopsis thaliana OX=3702 GN=CAM7 PE=3 SV=1	0	19.521	30	5	5	5	1	214	24.5	5.91	17.21	5	0
High	Master Protein Candidate	P59220	Calmodulin-7 OS=Arabidopsis thaliana OX=3702 GN=CAM7 PE=1 SV=2	0	19.521	44	5	5	5	1	149	16.8	4.27	17.21	5	0
High	Master Protein Candidate	F4IVN6	Calmodulin 5 OS=Arabidopsis thaliana OX=3702 GN=CAM5 PE=3 SV=1	0	19.521	36	5	5	5	1	181	20.6	4.82	17.21	5	0
High	Master Protein Candidate	P0DH97	Calmodulin-2 OS=Arabidopsis thaliana OX=3702 GN=CAM2 PE=1 SV=1	0	19.521	44	5	5	5	1	149	16.8	4.27	17.21	5	0
High	Master Protein Candidate	P0DH95	Calmodulin-1 OS=Arabidopsis thaliana OX=3702 GN=CAM1 PE=1 SV=1	0	19.521	44	5	5	5	1	149	16.9	4.27	17.21	5	0
High	Master Protein	Q9ZR03	Cytochrome b6-f complex iron-sulfur subunit, chloroplastic OS=Arabidopsis thaliana OX=3702 GN=petC PE=1 SV=1	0	19.51	31	5	5	5	1	229	24.4	8.54	15.03	5	0
High	Master Protein Candidate	B9DG17	40S ribosomal protein SA OS=Arabidopsis thaliana OX=3702 GN=P40 PE=1 SV=1	0	19.308	25	6	6	6	1	294	32	5.15	17.55	6	0
High	Master Protein	Q08682	40S ribosomal protein Sa-1 OS=Arabidopsis thaliana OX=3702 GN=RPSaA PE=1 SV=3	0	19.308	24	6	6	6	1	298	32.3	5.15	17.55	6	0
High	None	Q42560	Aconitate hydratase 1 OS=Arabidopsis thaliana OX=3702 GN=ACO1 PE=1 SV=2	0	19.049	6	4	6	3	1	898	98.1	6.4	17.49	4	0
High	None	A0A1P8BCX7	Calcium sensing receptor OS=Arabidopsis thaliana OX=3702 GN=CaS PE=1 SV=1	0	18.948	26	6	6	6	1	310	32.9	9.06	16.97	6	0
High	None	Q9SLM6	Glutathione S-transferase F3 OS=Arabidopsis thaliana OX=3702 GN=GSTF3 PE=2 SV=1	0	18.362	26	6	9	4	1	212	24.1	6.74	17.83	6	0
High	Master Protein	A0A1P8B564	Catalase OS=Arabidopsis thaliana OX=3702 GN=CAT2 PE=3 SV=1	0	18.174	14	6	7	2	1	492	56.9	7.12	14.59	6	0
High	Master Protein Candidate	P25819	Catalase-2 OS=Arabidopsis thaliana OX=3702 GN=CAT2 PE=1 SV=3	0	18.174	14	6	7	2	1	492	56.9	7.12	14.59	6	0
High	Master Protein	P49688	40S ribosomal protein S2-3 OS=Arabidopsis thaliana OX=3702 GN=RPS2C PE=1 SV=2	0	17.948	24	6	6	3	1	285	30.9	10.29	20.32	6	3
High	Master Protein	O23255	Adenosylhomocysteinase 1 OS=Arabidopsis thaliana OX=3702 GN=SAHH1 PE=1 SV=1	0	17.761	14	8	9	8	1	485	53.3	5.97	19.59	8	0
High	Master Protein	Q93VG5	40S ribosomal protein S8-1 OS=Arabidopsis thaliana OX=3702 GN=RPS8A PE=1 SV=1	0	17.716	20	4	4	4	1	222	25	10.32	13.25	4	0
High	Master Protein	Q96292	Actin-2 OS=Arabidopsis thaliana OX=3702 GN=ACT2 PE=1 SV=1	0	17.533	20	6	6	3	1	377	41.9	5.58	16.73	6	3
High	Master Protein Candidate	Q96293	Actin-8 OS=Arabidopsis thaliana OX=3702 GN=ACT8 PE=1 SV=2	0	17.533	20	6	6	3	1	377	41.8	5.58	16.73	6	0
High	Master Protein	Q9ZRW8	Glutathione S-transferase U19 OS=Arabidopsis thaliana OX=3702 GN=GSTU19 PE=1 SV=1	0	17.431	31	6	7	6	1	219	25.6	6.04	16.98	6	0
High	None	F4JM86	Catalase OS=Arabidopsis thaliana OX=3702 GN=CAT2 PE=3 SV=1	0	17.332	14	5	6	2	1	474	55	6.83	12.2	5	0
High	None	Q9SXJ7	Chaperone protein ClpC2, chloroplastic OS=Arabidopsis thaliana OX=3702 GN=CLPC2 PE=1 SV=1	0	17.273	7	5	5	5	1	952	105.7	6.42	16.63	5	0
High	None	F4JF64	Clp ATPase OS=Arabidopsis thaliana OX=3702 GN=HSP93-III PE=3 SV=1	0	17.273	7	5	5	5	1	921	102.2	6.21	16.63	5	0
High	Master Protein	P46283	Sedoheptulose-1,7-bisphosphatase, chloroplastic OS=Arabidopsis thaliana OX=3702 GN=At3g55800 PE=2 SV=1	0	17.263	17	6	6	6	1	393	42.4	6.57	15.5	6	0
High	Master Protein Candidate	P51818	Heat shock protein 90-3 OS=Arabidopsis thaliana OX=3702 GN=HSP90-3 PE=1 SV=2	0	17.259	9	5	5	5	1	699	80	5.05	16.32	5	0
High	Master Protein	F4K6B6	Heat shock protein 81-2 OS=Arabidopsis thaliana OX=3702 GN=HSP81-2 PE=1 SV=1	0	17.259	9	5	5	5	1	728	83.1	5.03	16.32	5	0
High	Master Protein Candidate	P55737	Heat shock protein 90-2 OS=Arabidopsis thaliana OX=3702 GN=HSP90-2 PE=1 SV=1	0	17.259	9	5	5	5	1	699	80	5.05	16.32	5	0
High	Master Protein Candidate	O03986	Heat shock protein 90-4 OS=Arabidopsis thaliana OX=3702 GN=HSP90-4 PE=1 SV=1	0	17.259	9	5	5	5	1	699	80.1	5.05	16.32	5	0
High	None	P46010	Nitrilase 3 OS=Arabidopsis thaliana OX=3702 GN=NIT3 PE=1 SV=1	0	17.236	15	4	4	2	1	346	38	5.95	17.3	4	0
High	Master Protein	Q96300	14-3-3-like protein GF14 nu OS=Arabidopsis thaliana OX=3702 GN=GRF7 PE=1 SV=1	0	16.951	26	6	7	1	1	265	29.8	4.82	17.44	6	1
High	Master Protein	Q9FVT2	Probable elongation factor 1-gamma 2 OS=Arabidopsis thaliana OX=3702 GN=At1g57720 PE=1 SV=1	0	16.914	8	3	4	3	1	413	46.4	5.71	15.27	3	0
High	Master Protein	O48549	40S ribosomal protein S6-1 OS=Arabidopsis thaliana OX=3702 GN=RPS6A PE=1 SV=2	0	16.905	21	4	4	4	1	250	28.4	10.61	12.14	4	0
High	None	Q9S9N1	Heat shock 70 kDa protein 5 OS=Arabidopsis thaliana OX=3702 GN=HSP70-5 PE=2 SV=1	0	16.848	7	4	4	0	2	646	70.9	5.41	10.59	4	0
High	Master Protein Candidate	A0A1P8B1N1	Enolase OS=Arabidopsis thaliana OX=3702 GN=LOS2 PE=1 SV=1	0	16.822	21	6	7	6	1	433	46.5	5.53	15.77	6	0
High	Master Protein	P25696	Bifunctional enolase 2/transcriptional activator OS=Arabidopsis thaliana OX=3702 GN=ENO2 PE=1 SV=1	0	16.822	20	6	7	6	1	444	47.7	5.77	15.77	6	0
High	Master Protein	P48491	Triosephosphate isomerase, cytosolic OS=Arabidopsis thaliana OX=3702 GN=CTIMC PE=1 SV=2	0	16.745	23	5	6	4	1	254	27.2	5.5	10	5	0
High	Master Protein	Q9SZJ5	Serine hydroxymethyltransferase 1, mitochondrial OS=Arabidopsis thaliana OX=3702 GN=SHM1 PE=1 SV=1	0	16.739	10	4	5	4	1	517	57.4	8.13	16.84	4	0
High	Master Protein	P27521	Chlorophyll a-b binding protein 4, chloroplastic OS=Arabidopsis thaliana OX=3702 GN=LHCA4 PE=1 SV=1	0	16.673	19	3	4	3	1	251	27.7	6.7	15.48	3	0
High	None	F4K8M3	Calmodulin 1 OS=Arabidopsis thaliana OX=3702 GN=CAM1 PE=3 SV=1	0	16.157	29	4	4	4	1	164	18.5	4.31	14.09	4	0
High	None	A0A1P8BAP4	Calmodulin 1 OS=Arabidopsis thaliana OX=3702 GN=CAM1 PE=3 SV=1	0	16.157	35	4	4	4	1	136	15.4	4.41	14.09	4	0
High	None	A0A1I9LPJ1	Calmodulin 7 OS=Arabidopsis thaliana OX=3702 GN=CAM7 PE=3 SV=1	0	16.157	42	4	4	4	1	113	12.9	4.32	14.09	4	0
High	None	F4K8M2	Calmodulin 1 OS=Arabidopsis thaliana OX=3702 GN=CAM1 PE=3 SV=1	0	16.157	27	4	4	4	1	175	19.8	4.32	14.09	4	0
High	None	F4IEU4	Calmodulin 4 OS=Arabidopsis thaliana OX=3702 GN=CAM4 PE=3 SV=1	0	16.157	30	4	4	4	1	159	17.8	4.22	14.09	4	0
High	None	A0A1P8ANC4	Calmodulin 4 OS=Arabidopsis thaliana OX=3702 GN=CAM4 PE=3 SV=1	0	16.157	42	4	4	4	1	113	12.9	4.32	14.09	4	0
High	None	F4IJ46	Calmodulin 2 OS=Arabidopsis thaliana OX=3702 GN=CAM2 PE=3 SV=1	0	16.157	30	4	4	4	1	161	18.1	4.31	14.09	4	0
High	Master Protein	Q9FKW6	Ferredoxin--NADP reductase, leaf isozyme 1, chloroplastic OS=Arabidopsis thaliana OX=3702 GN=LFNR1 PE=1 SV=1	0	16.076	20	5	5	4	1	360	40.3	8.13	14.07	5	1
High	Master Protein Candidate	F4JZ46	Ferredoxin--NADP reductase, chloroplastic OS=Arabidopsis thaliana OX=3702 GN=FNR1 PE=1 SV=1	0	16.076	28	5	5	4	1	262	29.7	6.15	14.07	5	0
High	Master Protein Candidate	Q9M339	40S ribosomal protein S3-2 OS=Arabidopsis thaliana OX=3702 GN=RPS3B PE=1 SV=1	0	16.064	24	5	5	5	1	249	27.3	9.54	15.8	5	0
High	Master Protein	Q9SIP7	40S ribosomal protein S3-1 OS=Arabidopsis thaliana OX=3702 GN=RPS3A PE=1 SV=1	0	16.064	24	5	5	5	1	250	27.5	9.54	15.8	5	0
High	None	F4JTV4	Adenosylhomocysteinase OS=Arabidopsis thaliana OX=3702 GN=HOG1 PE=3 SV=1	0	15.986	14	7	8	7	1	440	48.4	6.84	16.67	7	0
High	Master Protein	Q9ZT91	Elongation factor Tu, mitochondrial OS=Arabidopsis thaliana OX=3702 GN=TUFA PE=1 SV=1	0	15.848	7	2	5	1	1	454	49.4	6.7	15.85	2	0
High	Master Protein	Q9FWR4	Glutathione S-transferase DHAR1, mitochondrial OS=Arabidopsis thaliana OX=3702 GN=DHAR1 PE=1 SV=1	0	15.74	26	5	5	5	1	213	23.6	5.91	10.63	5	0
High	None	P42645	14-3-3-like protein GF14 upsilon OS=Arabidopsis thaliana OX=3702 GN=GRF5 PE=1 SV=2	0	15.728	21	5	6	1	1	268	30.2	4.81	17.44	5	0
High	Master Protein	P42644	14-3-3-like protein GF14 psi OS=Arabidopsis thaliana OX=3702 GN=GRF3 PE=1 SV=2	0	15.579	24	5	6	1	1	255	28.6	4.79	17.66	5	0
High	Master Protein Candidate	Q93VH9	40S ribosomal protein S4-1 OS=Arabidopsis thaliana OX=3702 GN=RPS4A PE=2 SV=1	0	15.571	18	4	5	4	1	261	29.8	10.17	13.39	4	0
High	Master Protein Candidate	Q8VYK6	40S ribosomal protein S4-3 OS=Arabidopsis thaliana OX=3702 GN=RPS4D PE=2 SV=2	0	15.571	18	4	5	4	1	262	29.8	10.21	13.39	4	0
High	Master Protein	P49204	40S ribosomal protein S4-2 OS=Arabidopsis thaliana OX=3702 GN=RPS4B PE=2 SV=4	0	15.571	18	4	5	4	1	262	29.9	10.17	13.39	4	0
High	Master Protein Candidate	F4K5C7	40S ribosomal protein S4 OS=Arabidopsis thaliana OX=3702 GN=At5g07090 PE=3 SV=1	0	15.571	20	4	5	4	1	244	27.7	9.99	13.39	4	0
High	Master Protein	Q9LW57	Plastid-lipid-associated protein 6, chloroplastic OS=Arabidopsis thaliana OX=3702 GN=PAP6 PE=1 SV=1	0	15.321	27	6	7	6	1	284	30.4	6.13	14.57	6	0
High	Master Protein Candidate	A0A1I9LQU5	Plastid-lipid associated protein PAP / fibrillin family protein OS=Arabidopsis thaliana OX=3702 GN=FIB4 PE=1 SV=1	0	15.321	35	6	7	6	1	221	23.5	6.21	14.57	6	0
High	Master Protein	P30184	Leucine aminopeptidase 1 OS=Arabidopsis thaliana OX=3702 GN=LAP1 PE=1 SV=1	0	15.256	13	4	4	2	1	520	54.5	5.92	10.87	4	2
High	None	B3H6D7	Fructose-bisphosphate aldolase OS=Arabidopsis thaliana OX=3702 GN=FBA6 PE=3 SV=1	0	15.211	21	3	3	2	1	267	28.7	8.28	12.07	3	0
High	None	Q9M5K2	Dihydrolipoyl dehydrogenase 2, mitochondrial OS=Arabidopsis thaliana OX=3702 GN=LPD2 PE=1 SV=1	0	15.203	9	4	6	4	1	507	54	7.03	10.35	4	0
High	Master Protein Candidate	Q9S7J7	Chlorophyll a-b binding protein 2.2, chloroplastic OS=Arabidopsis thaliana OX=3702 GN=LHCB2.2 PE=1 SV=1	0	15.085	18	4	6	4	1	265	28.6	5.43	13.32	4	0
High	Master Protein Candidate	Q9XF87	Chlorophyll a-b binding protein 2.4, chloroplastic OS=Arabidopsis thaliana OX=3702 GN=LHCB2.4 PE=1 SV=1	0	15.085	18	4	6	4	1	266	28.8	5.9	13.32	4	0
High	Master Protein	A0A1P8AZ91	Chlorophyll a-b binding protein, chloroplastic OS=Arabidopsis thaliana OX=3702 GN=LHCB2.1 PE=3 SV=1	0	15.085	15	4	6	4	1	317	35.1	7.02	13.32	4	0
High	Master Protein Candidate	A0A1I9LMB4	Chlorophyll a-b binding protein, chloroplastic OS=Arabidopsis thaliana OX=3702 GN=LHCB2.3 PE=3 SV=1	0	15.085	16	4	6	4	1	298	32.6	6.23	13.32	4	0
High	Master Protein Candidate	Q9SHR7	Chlorophyll a-b binding protein 2.1, chloroplastic OS=Arabidopsis thaliana OX=3702 GN=LHCB2.1 PE=1 SV=1	0	15.085	18	4	6	4	1	265	28.6	5.43	13.32	4	0
High	Master Protein Candidate	Q93VB8	40S ribosomal protein S2-2 OS=Arabidopsis thaliana OX=3702 GN=RPS2B PE=2 SV=1	0	15.047	18	5	5	2	1	284	30.8	10.26	16.2	5	0
High	Master Protein	Q8L8Y0	40S ribosomal protein S2-1 OS=Arabidopsis thaliana OX=3702 GN=RPS2A PE=2 SV=2	0	15.047	18	5	5	2	1	284	30.7	10.26	16.2	5	0
High	Master Protein	Q9LR30	Glutamate--glyoxylate aminotransferase 1 OS=Arabidopsis thaliana OX=3702 GN=GGAT1 PE=1 SV=1	0	15.002	13	5	5	5	1	481	53.3	6.89	13.92	5	0
High	None	P57106	Malate dehydrogenase 2, cytoplasmic OS=Arabidopsis thaliana OX=3702 GN=MDH2 PE=1 SV=1	0	14.968	19	5	5	5	1	332	35.7	6.79	11.7	5	0
High	Master Protein Candidate	Q9ZUT9	40S ribosomal protein S5-1 OS=Arabidopsis thaliana OX=3702 GN=RPS5A PE=1 SV=1	0	14.904	14	2	3	2	1	207	23	9.67	13.96	2	0
High	Master Protein	P51427	40S ribosomal protein S5-2 OS=Arabidopsis thaliana OX=3702 GN=RPS5B PE=1 SV=2	0	14.904	14	2	3	2	1	207	22.9	9.63	13.96	2	0
High	Master Protein	Q56YA5	Serine--glyoxylate aminotransferase OS=Arabidopsis thaliana OX=3702 GN=AGT1 PE=1 SV=2	0	14.865	13	4	4	4	1	401	44.2	7.83	12.51	4	0
High	Master Protein	A0A2P2CLF9	ATP synthase subunit alpha OS=Arabidopsis thaliana OX=3702 GN=atp1 PE=3 SV=1	0	14.731	15	7	8	6	1	507	55.1	6.33	12.15	7	0
High	Master Protein Candidate	P92549	ATP synthase subunit alpha, mitochondrial OS=Arabidopsis thaliana OX=3702 GN=ATPA PE=1 SV=2	0	14.731	15	7	8	6	1	507	55	6.61	12.15	7	0
High	Master Protein Candidate	A0A1P8ANC0	Hydroxypyruvate reductase OS=Arabidopsis thaliana OX=3702 GN=HPR PE=3 SV=1	0	14.696	9	2	3	2	1	360	39.7	8.03	11.84	2	0
High	Master Protein	Q9C9W5	Glycerate dehydrogenase HPR, peroxisomal OS=Arabidopsis thaliana OX=3702 GN=HPR PE=1 SV=1	0	14.696	9	2	3	2	1	386	42.2	7.15	11.84	2	0
High	Master Protein	Q9S7M0	Chlorophyll a-b binding protein 3, chloroplastic OS=Arabidopsis thaliana OX=3702 GN=LHCB3 PE=1 SV=1	0	14.657	10	2	5	2	1	265	28.7	5.12	14.39	2	0
High	Master Protein	Q42139	AT4g32260/F10M6_100 OS=Arabidopsis thaliana OX=3702 GN=PDE334 PE=1 SV=2	0	14.61	12	3	4	3	1	219	23.9	5.86	11.17	3	0
High	Master Protein	Q39258	V-type proton ATPase subunit E1 OS=Arabidopsis thaliana OX=3702 GN=VHA-E1 PE=1 SV=2	0	14.569	19	4	5	4	1	230	26	6.4	9.65	4	0
High	None	A8MQP1	S-adenosyl-L-homocysteine hydrolase OS=Arabidopsis thaliana OX=3702 GN=HOG1 PE=4 SV=1	0	14.404	14	5	6	5	1	325	35.5	5.16	14.8	5	0
High	None	F4J8V9	Actin 2 OS=Arabidopsis thaliana OX=3702 GN=ACT2 PE=1 SV=1	0	14.401	17	5	5	2	1	371	41.2	5.69	16.73	5	0
High	None	Q8LFU8	Nitrilase 1 OS=Arabidopsis thaliana OX=3702 GN=NIT1 PE=2 SV=1	0	14.383	24	4	5	0	2	224	24.9	5.76	15.78	4	0
High	Master Protein	O82662	Succinate--CoA ligase [ADP-forming] subunit beta, mitochondrial OS=Arabidopsis thaliana OX=3702 GN=At2g20420 PE=1 SV=1	0	14.326	11	4	4	4	1	421	45.3	6.71	12.54	4	0
High	None	F4JTV5	S-adenosyl-L-homocysteine hydrolase OS=Arabidopsis thaliana OX=3702 GN=HOG1 PE=4 SV=1	0	14.239	14	6	7	6	1	364	40	6.46	14.61	6	0
High	Master Protein Candidate	O80860	ATP-dependent zinc metalloprotease FTSH 2, chloroplastic OS=Arabidopsis thaliana OX=3702 GN=FTSH2 PE=1 SV=1	0	14.221	12	6	6	6	1	695	74.1	6.35	10.72	6	0
High	Master Protein Candidate	Q8W585	ATP-dependent zinc metalloprotease FTSH 8, chloroplastic OS=Arabidopsis thaliana OX=3702 GN=FTSH8 PE=1 SV=1	0	14.221	12	6	6	6	1	685	73.2	5.95	10.72	6	0
High	Master Protein	A0A1P8AXC1	FtsH extracellular protease family OS=Arabidopsis thaliana OX=3702 GN=VAR2 PE=3 SV=1	0	14.221	12	6	6	6	1	699	74.6	6.35	10.72	6	0
High	Master Protein	A0A1P8B582	Cytosol aminopeptidase family protein OS=Arabidopsis thaliana OX=3702 GN=At4g30910 PE=3 SV=1	0	14.063	8	3	3	1	1	604	63.8	7.12	11.27	3	0
High	Master Protein Candidate	Q8RX72	Leucine aminopeptidase 3, chloroplastic OS=Arabidopsis thaliana OX=3702 GN=LAP3 PE=2 SV=1	0	14.063	8	3	3	1	1	581	61.3	6.7	11.27	3	0
High	Master Protein Candidate	Q944P7	Leucine aminopeptidase 2, chloroplastic OS=Arabidopsis thaliana OX=3702 GN=LAP2 PE=2 SV=2	0	14.063	8	3	3	1	1	583	61.3	7.08	11.27	3	0
High	Master Protein	Q9S7W1	Chlorophyll a-b binding protein CP29.3, chloroplastic OS=Arabidopsis thaliana OX=3702 GN=LHCB4.3 PE=2 SV=1	0	14.019	14	4	5	3	1	276	30.2	5.36	12.34	4	0
High	Master Protein Candidate	Q9SFU1	60S ribosomal protein L13a-1 OS=Arabidopsis thaliana OX=3702 GN=RPL13AA PE=2 SV=1	0	13.879	6	1	4	1	1	206	23.5	10.4	5.58	1	0
High	Master Protein Candidate	Q9FKC0	60S ribosomal protein L13a-4 OS=Arabidopsis thaliana OX=3702 GN=RPL13AD PE=2 SV=1	0	13.879	6	1	4	1	1	206	23.6	10.37	5.58	1	0
High	Master Protein Candidate	Q9SVR0	60S ribosomal protein L13a-3 OS=Arabidopsis thaliana OX=3702 GN=RPL13AC PE=2 SV=1	0	13.879	6	1	4	1	1	206	23.6	10.39	5.58	1	0
High	Master Protein	F4JD96	Ribosomal protein L13 family protein OS=Arabidopsis thaliana OX=3702 GN=At3g07110 PE=3 SV=1	0	13.879	6	1	4	1	1	207	23.6	10.4	5.58	1	0
High	Master Protein Candidate	Q9LRX8	60S ribosomal protein L13a-2 OS=Arabidopsis thaliana OX=3702 GN=RPL13AB PE=2 SV=1	0	13.879	6	1	4	1	1	206	23.4	10.35	5.58	1	0
High	Master Protein Candidate	Q9LFA3	Monodehydroascorbate reductase 1, peroxisomal OS=Arabidopsis thaliana OX=3702 GN=MDAR1 PE=1 SV=1	0	13.844	15	5	5	5	1	434	46.5	6.83	9.94	5	0
High	Master Protein	F4J849	Monodehydroascorbate reductase 1 OS=Arabidopsis thaliana OX=3702 GN=MDAR1 PE=1 SV=1	0	13.844	14	5	5	5	1	466	50.1	8.16	9.94	5	0
High	Master Protein	Q9C9C5	60S ribosomal protein L6-3 OS=Arabidopsis thaliana OX=3702 GN=RPL6C PE=2 SV=1	0	13.834	13	3	5	3	1	233	26.1	10.17	15.57	3	0
High	Master Protein Candidate	Q9C9C6	60S ribosomal protein L6-2 OS=Arabidopsis thaliana OX=3702 GN=RPL6B PE=2 SV=1	0	13.834	13	3	5	3	1	233	26	10.17	15.57	3	0
High	Master Protein Candidate	Q9FZ76	60S ribosomal protein L6-1 OS=Arabidopsis thaliana OX=3702 GN=RPL6A PE=2 SV=1	0	13.834	13	3	5	3	1	233	26.1	10.1	15.57	3	0
High	Master Protein	O80934	Uncharacterized protein At2g37660, chloroplastic OS=Arabidopsis thaliana OX=3702 GN=At2g37660 PE=1 SV=2	0	13.821	17	3	4	3	1	325	34.9	8.31	12.66	3	0
High	Master Protein Candidate	F4HR88	Leucine-rich repeat (LRR) family protein OS=Arabidopsis thaliana OX=3702 GN=At1g33590 PE=4 SV=1	0	13.728	12	5	5	5	1	477	51.7	8.91	13.26	5	0
High	Master Protein	A0A1P8AWX3	Leucine-rich repeat (LRR) family protein OS=Arabidopsis thaliana OX=3702 GN=At1g33590 PE=4 SV=1	0	13.728	11	5	5	5	1	514	55.8	8.91	13.26	5	0
High	Master Protein Candidate	Q9FW47	Leucine-rich repeat (LRR) family protein OS=Arabidopsis thaliana OX=3702 GN=At1g33590 PE=4 SV=1	0	13.728	12	5	5	5	1	512	55.5	8.91	13.26	5	0
High	Master Protein	Q42290	Probable mitochondrial-processing peptidase subunit beta, mitochondrial OS=Arabidopsis thaliana OX=3702 GN=At3g02090 PE=1 SV=2	0	13.724	8	3	4	3	1	531	59.1	6.79	13.56	3	0
High	None	O80988	Glycine dehydrogenase (decarboxylating) 2, mitochondrial OS=Arabidopsis thaliana OX=3702 GN=GLDP2 PE=1 SV=1	0	13.628	6	4	4	4	1	1044	113.7	6.65	10.41	4	0
High	None	A8MS03	Ribosomal protein S6 OS=Arabidopsis thaliana OX=3702 GN=RPS6 PE=1 SV=1	0	13.578	22	3	3	3	1	188	21.4	11.46	9.21	3	0
High	Master Protein	Q8W4E2	V-type proton ATPase subunit B3 OS=Arabidopsis thaliana OX=3702 GN=VHA-B3 PE=2 SV=1	0	13.118	10	4	4	4	1	487	54.3	5.1	13.91	4	0
High	Master Protein Candidate	P11574	V-type proton ATPase subunit B1 OS=Arabidopsis thaliana OX=3702 GN=VHA-B1 PE=2 SV=2	0	13.118	10	4	4	4	1	486	54.1	5.1	13.91	4	0
High	Master Protein	P59259	Histone H4 OS=Arabidopsis thaliana OX=3702 GN=At1g07660 PE=1 SV=2	0	13.114	41	4	5	4	1	103	11.4	11.47	13.93	4	0
High	Master Protein	B3H560	Malate dehydrogenase OS=Arabidopsis thaliana OX=3702 GN=PMDH2 PE=3 SV=1	0	13.108	7	2	3	2	1	363	38.7	8.95	10.24	2	0
High	Master Protein Candidate	Q9ZP05	Malate dehydrogenase 2, peroxisomal OS=Arabidopsis thaliana OX=3702 GN=PMDH2 PE=1 SV=1	0	13.108	7	2	3	2	1	354	37.3	7.99	10.24	2	0
High	Master Protein Candidate	A8MRP1	Malate dehydrogenase OS=Arabidopsis thaliana OX=3702 GN=PMDH2 PE=3 SV=1	0	13.108	7	2	3	2	1	342	36.3	8.84	10.24	2	0
High	Master Protein Candidate	F4KDZ4	Malate dehydrogenase OS=Arabidopsis thaliana OX=3702 GN=PMDH2 PE=3 SV=1	0	13.108	8	2	3	2	1	333	35	7.66	10.24	2	0
High	Master Protein	Q9XF91	Photosystem II 22 kDa protein, chloroplastic OS=Arabidopsis thaliana OX=3702 GN=PSBS PE=2 SV=1	0	13.047	15	4	4	4	1	265	28	9.26	11.88	4	0
High	None	A0A1I9LQU3	Plastid-lipid associated protein PAP / fibrillin family protein OS=Arabidopsis thaliana OX=3702 GN=FIB4 PE=1 SV=1	0	12.987	31	5	6	5	1	212	22.5	7.96	11.33	5	0
High	Master Protein	Q9ZVL6	UPF0603 protein At1g54780, chloroplastic OS=Arabidopsis thaliana OX=3702 GN=At1g54780 PE=1 SV=1	0	12.958	20	5	5	5	1	285	31.1	8.84	13.85	5	0
High	Master Protein	Q9S714	Photosystem I reaction center subunit IV B, chloroplastic OS=Arabidopsis thaliana OX=3702 GN=PSAE2 PE=2 SV=1	0	12.934	26	2	3	1	1	145	15.2	9.95	12.59	2	1
High	None	Q96528	Catalase-1 OS=Arabidopsis thaliana OX=3702 GN=CAT1 PE=1 SV=3	0	12.857	8	3	5	2	1	492	56.7	7.42	15.67	3	0
High	Master Protein	O65581	Fructose-bisphosphate aldolase 5, cytosolic OS=Arabidopsis thaliana OX=3702 GN=FBA5 PE=1 SV=1	0	12.768	8	3	4	1	1	358	38.3	5.81	10.58	3	0
High	None	Q9LK36	Adenosylhomocysteinase 2 OS=Arabidopsis thaliana OX=3702 GN=SAHH2 PE=2 SV=1	0	12.657	7	4	5	4	1	485	53.1	5.74	12.74	4	0
High	Master Protein	O49629	Probable plastid-lipid-associated protein 2, chloroplastic OS=Arabidopsis thaliana OX=3702 GN=PAP2 PE=1 SV=1	0	12.584	18	5	5	4	1	310	33.6	5.83	14.13	5	1
High	Master Protein	Q8H0U5	Protein TIC 62, chloroplastic OS=Arabidopsis thaliana OX=3702 GN=TIC62 PE=1 SV=1	0	12.385	8	2	3	2	1	641	68.3	8.1	10.72	2	0
High	Master Protein	Q9LJR2	Lectin-like protein LEC OS=Arabidopsis thaliana OX=3702 GN=LEC PE=1 SV=1	0	12.301	17	4	4	4	1	271	29.7	8.87	11.36	4	0
High	None	P46077	14-3-3-like protein GF14 phi OS=Arabidopsis thaliana OX=3702 GN=GRF4 PE=1 SV=2	0	12.286	22	5	6	1	1	267	30.2	4.87	14.24	5	0
High	None	Q01525	14-3-3-like protein GF14 omega OS=Arabidopsis thaliana OX=3702 GN=GRF2 PE=2 SV=2	0	12.286	23	5	6	1	1	259	29.1	4.79	14.24	5	0
High	None	F4HWQ5	GF14 protein phi chain OS=Arabidopsis thaliana OX=3702 GN=GF14 PHI PE=1 SV=1	0	12.286	20	5	6	1	1	295	33.3	4.81	14.24	5	0
High	None	Q9SCM3	40S ribosomal protein S2-4 OS=Arabidopsis thaliana OX=3702 GN=RPS2D PE=2 SV=1	0	12.141	14	4	4	1	1	276	30.1	10.18	13.31	4	0
High	None	Q9S7E9	Glutamate--glyoxylate aminotransferase 2 OS=Arabidopsis thaliana OX=3702 GN=GGAT2 PE=1 SV=1	0	12.045	11	4	4	4	1	481	53.4	6.58	10.09	4	0
High	Master Protein	O81439	Probable plastid-lipid-associated protein 1, chloroplastic OS=Arabidopsis thaliana OX=3702 GN=PAP1 PE=1 SV=1	0	11.837	13	3	3	2	1	318	34.9	5.6	9.94	3	0
High	Master Protein Candidate	C0Z2A8	Ferredoxin--NADP reductase, chloroplastic OS=Arabidopsis thaliana OX=3702 GN=FNR2 PE=2 SV=1	0	11.836	22	4	5	3	1	255	28.7	6.02	12.79	4	0
High	Master Protein	Q8W493	Ferredoxin--NADP reductase, leaf isozyme 2, chloroplastic OS=Arabidopsis thaliana OX=3702 GN=LFNR2 PE=1 SV=1	0	11.836	15	4	5	3	1	369	41.1	8.31	12.79	4	0
High	Master Protein	F4KGV5	G-box regulating factor 6 OS=Arabidopsis thaliana OX=3702 GN=GRF6 PE=3 SV=1	0	11.55	14	3	4	1	1	258	29.1	5	10.83	3	0
High	Master Protein Candidate	F4KGV2	G-box regulating factor 6 OS=Arabidopsis thaliana OX=3702 GN=GRF6 PE=3 SV=1	0	11.55	14	3	4	1	1	246	27.7	4.89	10.83	3	0
High	Master Protein Candidate	P48349	14-3-3-like protein GF14 lambda OS=Arabidopsis thaliana OX=3702 GN=GRF6 PE=1 SV=1	0	11.55	14	3	4	1	1	248	28	4.84	10.83	3	0
High	Master Protein	Q56WK6	Patellin-1 OS=Arabidopsis thaliana OX=3702 GN=PATL1 PE=1 SV=2	0	11.414	9	4	4	4	1	573	64	4.83	6.16	4	0
High	Master Protein Candidate	F4I576	Monodehydroascorbate reductase 6 OS=Arabidopsis thaliana OX=3702 GN=MDAR6 PE=4 SV=1	0	11.395	7	2	3	2	1	482	52.1	7.75	10.81	2	0
High	Master Protein	P92947	Monodehydroascorbate reductase, chloroplastic/mitochondrial OS=Arabidopsis thaliana OX=3702 GN=MDAR5 PE=1 SV=3	0	11.395	6	2	3	2	1	493	53.3	8.02	10.81	2	0
High	Master Protein Candidate	F4I577	Monodehydroascorbate reductase 6 OS=Arabidopsis thaliana OX=3702 GN=MDAR6 PE=4 SV=1	0	11.395	8	2	3	2	1	416	45	8.59	10.81	2	0
High	None	P40941	ADP,ATP carrier protein 2, mitochondrial OS=Arabidopsis thaliana OX=3702 GN=AAC2 PE=1 SV=2	0	11.393	8	3	4	3	1	385	41.7	9.79	12.51	3	0
High	Master Protein	Q9LYG3	NADP-dependent malic enzyme 2 OS=Arabidopsis thaliana OX=3702 GN=NADP-ME2 PE=1 SV=1	0	11.181	8	3	3	3	1	588	64.4	6.42	11.01	3	0
High	None	F4IMB5	ATPase, F1 complex, alpha subunit protein OS=Arabidopsis thaliana OX=3702 GN=At2g07698 PE=3 SV=1	0	11.176	7	5	6	4	1	777	85.9	5.57	9.11	5	0
High	None	F4IEG8	Chlorophyll A-B binding family protein OS=Arabidopsis thaliana OX=3702 GN=NPQ4 PE=4 SV=1	0	11.027	14	3	3	3	1	205	22	9.61	10.11	3	0
High	Master Protein	Q38900	Peptidyl-prolyl cis-trans isomerase CYP19-1 OS=Arabidopsis thaliana OX=3702 GN=CYP19-1 PE=2 SV=1	0	10.917	22	4	5	2	1	173	18.5	8.43	15.87	4	2
High	Master Protein	Q940B0	60S ribosomal protein L18-3 OS=Arabidopsis thaliana OX=3702 GN=RPL18C PE=2 SV=1	0	10.836	22	3	3	3	1	187	21	10.96	7.13	3	0
High	Master Protein Candidate	A0A1P8BGQ0	Ribosomal protein L18e/L15 superfamily protein OS=Arabidopsis thaliana OX=3702 GN=At5g27850 PE=4 SV=1	0	10.836	31	3	3	3	1	134	14.9	10.86	7.13	3	0
High	Master Protein Candidate	A8MQA1	60S ribosomal protein L13 OS=Arabidopsis thaliana OX=3702 GN=BBC1 PE=1 SV=1	0	10.791	19	4	4	4	1	204	23.5	11	8.4	4	0
High	Master Protein	P41127	60S ribosomal protein L13-1 OS=Arabidopsis thaliana OX=3702 GN=RPL13B PE=1 SV=1	0	10.791	18	4	4	4	1	206	23.8	11.02	8.4	4	0
High	None	Q9FJA6	40S ribosomal protein S3-3 OS=Arabidopsis thaliana OX=3702 GN=RPS3C PE=1 SV=1	0	10.711	19	4	4	4	1	248	27.4	9.54	11.35	4	0
High	Master Protein	P27202	Photosystem II 10 kDa polypeptide, chloroplastic OS=Arabidopsis thaliana OX=3702 GN=PSBR PE=1 SV=1	0	10.654	11	2	3	2	1	140	14.6	9.63	8.54	2	0
High	Master Protein Candidate	F4JUT9	Plasma-membrane associated cation-binding protein 1 OS=Arabidopsis thaliana OX=3702 GN=PCAP1 PE=1 SV=1	0	10.623	28	4	4	4	1	167	19	9.88	12.26	4	0
High	Master Protein	Q96262	Plasma membrane-associated cation-binding protein 1 OS=Arabidopsis thaliana OX=3702 GN=PCAP1 PE=1 SV=1	0	10.623	20	4	4	4	1	225	24.6	4.96	12.26	4	0
High	None	F4IW47	Transketolase-2, chloroplastic OS=Arabidopsis thaliana OX=3702 GN=TKL-2 PE=1 SV=1	0	10.469	5	4	4	4	1	741	79.9	6.58	10.02	4	0
High	Master Protein	P43082	Hevein-like preproprotein OS=Arabidopsis thaliana OX=3702 GN=HEL PE=1 SV=1	0	10.456	22	3	3	3	1	212	22.9	7.65	9.86	3	0
High	None	Q9SZN1	V-type proton ATPase subunit B2 OS=Arabidopsis thaliana OX=3702 GN=VHA-B2 PE=1 SV=1	0	10.453	8	3	3	3	1	487	54.3	5.15	10.18	3	0
High	None	F4JTQ0	Vacuolar proton pump subunit B OS=Arabidopsis thaliana OX=3702 GN=VAB2 PE=1 SV=1	0	10.453	7	3	3	3	1	494	55.1	5.25	10.18	3	0
High	None	Q9LTX9	Heat shock 70 kDa protein 7, chloroplastic OS=Arabidopsis thaliana OX=3702 GN=HSP70-7 PE=2 SV=1	0	10.436	6	4	4	4	1	718	77	5.3	10.71	4	0
High	Master Protein	Q9SRY5	Glutathione S-transferase F7 OS=Arabidopsis thaliana OX=3702 GN=GSTF7 PE=2 SV=3	0	10.377	9	3	5	1	1	209	23.6	6.62	11.61	3	0
High	Master Protein Candidate	P42760	Glutathione S-transferase F6 OS=Arabidopsis thaliana OX=3702 GN=GSTF6 PE=2 SV=2	0	10.377	9	3	5	1	1	208	23.5	6.23	11.61	3	0
High	Master Protein	P21240	Chaperonin 60 subunit beta 1, chloroplastic OS=Arabidopsis thaliana OX=3702 GN=CPN60B1 PE=1 SV=3	0	10.343	6	3	3	3	1	600	63.8	6.51	10.01	3	0
High	Master Protein Candidate	Q9LJE4	Chaperonin 60 subunit beta 2, chloroplastic OS=Arabidopsis thaliana OX=3702 GN=CPN60B2 PE=1 SV=1	0	10.343	6	3	3	3	1	596	63.3	5.73	10.01	3	0
High	Master Protein Candidate	Q9FH02	ATP-dependent zinc metalloprotease FTSH 5, chloroplastic OS=Arabidopsis thaliana OX=3702 GN=FTSH5 PE=1 SV=1	0	10.253	7	4	4	4	1	704	75.2	5.49	9.63	4	0
High	Master Protein	Q39102	ATP-dependent zinc metalloprotease FTSH 1, chloroplastic OS=Arabidopsis thaliana OX=3702 GN=FTSH1 PE=1 SV=2	0	10.253	7	4	4	4	1	716	76.7	5.83	9.63	4	0
High	Master Protein	Q9SZX3	Argininosuccinate synthase, chloroplastic OS=Arabidopsis thaliana OX=3702 GN=At4g24830 PE=1 SV=3	0	10.224	6	2	3	2	1	494	53.8	6.67	10.44	2	0
High	Master Protein Candidate	B3H778	Arginosuccinate synthase family OS=Arabidopsis thaliana OX=3702 GN=At4g24830 PE=1 SV=1	0	10.224	7	2	3	2	1	450	49	7.72	10.44	2	0
High	Master Protein	Q9SN86	Malate dehydrogenase, chloroplastic OS=Arabidopsis thaliana OX=3702 GN=At3g47520 PE=1 SV=1	0	10.123	9	2	2	2	1	403	42.4	8.51	8.84	2	0
High	None	O49344	Putative oxygen-evolving enhancer protein 2-2 OS=Arabidopsis thaliana OX=3702 GN=PSBP2 PE=5 SV=3	0	9.981	17	1	2	1	1	125	13.4	6.07	7.61	1	0
High	Master Protein Candidate	A0A1P8AYX4	Plasma membrane ATPase OS=Arabidopsis thaliana OX=3702 GN=HA1 PE=1 SV=1	0	9.944	6	3	3	3	1	885	96.8	7.12	5.88	3	0
High	Master Protein	P20649	ATPase 1, plasma membrane-type OS=Arabidopsis thaliana OX=3702 GN=AHA1 PE=1 SV=3	0	9.944	5	3	3	3	1	949	104.2	6.7	5.88	3	0
High	Master Protein	Q42593	L-ascorbate peroxidase T, chloroplastic OS=Arabidopsis thaliana OX=3702 GN=APXT PE=2 SV=2	0	9.888	9	3	3	2	1	426	46.1	7.28	8.83	3	1
High	Master Protein Candidate	A0A1P8APU0	Thylakoidal ascorbate peroxidase OS=Arabidopsis thaliana OX=3702 GN=TAPX PE=3 SV=1	0	9.888	9	3	3	2	1	421	45.6	7.84	8.83	3	0
High	Master Protein	P56759	ATP synthase subunit b, chloroplastic OS=Arabidopsis thaliana OX=3702 GN=atpF PE=3 SV=1	0	9.86	20	3	3	3	1	184	21	8.13	9.01	3	0
High	Master Protein	Q9FMU6	Mitochondrial phosphate carrier protein 3, mitochondrial OS=Arabidopsis thaliana OX=3702 GN=MPT3 PE=1 SV=1	0	9.845	11	3	3	3	1	375	40.1	9.2	8.61	3	0
High	None	F4JB06	Ribosomal protein S5/Elongation factor G/III/V family protein OS=Arabidopsis thaliana OX=3702 GN=MGH6.2 PE=4 SV=2	0	9.823	7	5	6	5	1	788	87.8	5.94	2	5	0
High	Master Protein	Q56WN1	Glutamine synthetase cytosolic isozyme 1-1 OS=Arabidopsis thaliana OX=3702 GN=GLN1-1 PE=1 SV=2	0	9.783	8	2	3	2	1	356	39.1	5.47	7.53	2	0
High	Master Protein	Q9LXC9	Soluble inorganic pyrophosphatase 6, chloroplastic OS=Arabidopsis thaliana OX=3702 GN=PPA6 PE=1 SV=1	0	9.781	12	3	3	3	1	300	33.4	6.01	10.69	3	0
High	Master Protein	Q9SF85	Adenosine kinase 1 OS=Arabidopsis thaliana OX=3702 GN=ADK1 PE=1 SV=1	0	9.634	14	3	3	3	1	344	37.8	5.45	8.21	3	0
High	Master Protein	Q9STT3	Aldose 1-epimerase OS=Arabidopsis thaliana OX=3702 GN=T23J7.130 PE=2 SV=1	0	9.598	9	2	2	2	1	358	39.7	9.07	8.5	2	0
High	None	P51430	40S ribosomal protein S6-2 OS=Arabidopsis thaliana OX=3702 GN=RPS6B PE=1 SV=3	0	9.595	15	3	3	3	1	249	28.1	10.83	7.43	3	0
High	None	F4KGU2	Ribosomal protein S6e OS=Arabidopsis thaliana OX=3702 GN=EMB3010 PE=1 SV=1	0	9.595	19	3	3	3	1	197	22.1	10.84	7.43	3	0
High	Master Protein	Q41932	Oxygen-evolving enhancer protein 3-2, chloroplastic OS=Arabidopsis thaliana OX=3702 GN=PSBQ2 PE=1 SV=2	0	9.591	11	3	3	1	1	230	24.6	9.72	8.08	3	0
High	None	O49447	ADP,ATP carrier protein 3, mitochondrial OS=Arabidopsis thaliana OX=3702 GN=AAC3 PE=1 SV=1	0	9.559	6	2	3	2	1	379	40.7	9.77	10.26	2	0
High	Master Protein	P56773	Cytochrome b6 OS=Arabidopsis thaliana OX=3702 GN=petB PE=1 SV=1	0	9.462	16	2	2	2	1	215	24.1	8.76	7.42	2	0
High	Master Protein Candidate	A8MRZ7	Eukaryotic translation initiation factor 4A1 OS=Arabidopsis thaliana OX=3702 GN=EIF4A1 PE=3 SV=1	0	9.444	10	3	3	2	1	402	45.7	6.28	9.98	3	0
High	Master Protein	A0A1I9LSZ7	Eukaryotic translation initiation factor 4A1 OS=Arabidopsis thaliana OX=3702 GN=EIF4A1 PE=1 SV=1	0	9.444	10	3	3	2	1	419	47.4	5.99	9.98	3	1
High	Master Protein Candidate	F4JEL4	Eukaryotic translation initiation factor 4A1 OS=Arabidopsis thaliana OX=3702 GN=EIF4A1 PE=1 SV=1	0	9.444	10	3	3	2	1	415	46.9	6.35	9.98	3	0
High	Master Protein Candidate	Q9CAI7	Eukaryotic initiation factor 4A-3 OS=Arabidopsis thaliana OX=3702 GN=TIF4A-3 PE=1 SV=1	0	9.444	10	3	3	2	1	414	46.7	5.33	9.98	3	0
High	Master Protein Candidate	P41376	Eukaryotic initiation factor 4A-1 OS=Arabidopsis thaliana OX=3702 GN=EIF4A1 PE=1 SV=1	0	9.444	10	3	3	2	1	412	46.7	5.68	9.98	3	0
High	Master Protein Candidate	P41377	Eukaryotic initiation factor 4A-2 OS=Arabidopsis thaliana OX=3702 GN=TIF4A-2 PE=1 SV=1	0	9.444	10	3	3	2	1	412	46.7	5.68	9.98	3	0
High	Master Protein	F4I7I0	Alanine aminotransferase 1, mitochondrial OS=Arabidopsis thaliana OX=3702 GN=ALAAT1 PE=1 SV=1	0	9.231	8	3	3	3	1	543	59.8	6.43	7.56	3	0
High	None	F4JUT8	Plasma-membrane associated cation-binding protein 1 OS=Arabidopsis thaliana OX=3702 GN=PCAP1 PE=1 SV=1	0	9.062	22	3	3	3	1	166	18.1	6.86	10.01	3	0
High	None	F4KGQ0	Fructose-bisphosphate aldolase 4, cytosolic OS=Arabidopsis thaliana OX=3702 GN=FBA4 PE=2 SV=1	0	9.036	4	2	3	0	3	393	42.9	8.91	7.03	2	0
High	Master Protein	Q42472	Glutamate decarboxylase 2 OS=Arabidopsis thaliana OX=3702 GN=GAD2 PE=1 SV=1	0	8.938	8	4	4	4	1	494	56.1	5.4	10.83	4	0
High	Master Protein	P39207	Nucleoside diphosphate kinase 1 OS=Arabidopsis thaliana OX=3702 GN=NDK1 PE=1 SV=1	0	8.932	23	3	3	3	1	149	16.5	6.79	9.58	3	0
High	Master Protein Candidate	Q9FF52	60S ribosomal protein L12-3 OS=Arabidopsis thaliana OX=3702 GN=RPL12C PE=2 SV=1	0	8.897	22	3	3	3	1	166	17.8	8.92	9	3	0
High	Master Protein	P50883	60S ribosomal protein L12-1 OS=Arabidopsis thaliana OX=3702 GN=RPL12A PE=2 SV=2	0	8.897	22	3	3	3	1	166	17.9	8.97	9	3	0
High	Master Protein Candidate	Q9LFH5	60S ribosomal protein L12-2 OS=Arabidopsis thaliana OX=3702 GN=RPL12B PE=1 SV=1	0	8.897	22	3	3	3	1	166	18	8.97	9	3	0
High	None	A8MQK3	Malate dehydrogenase OS=Arabidopsis thaliana OX=3702 GN=mMDH2 PE=3 SV=1	0	8.881	9	2	2	2	1	316	33.1	9.45	7.36	2	0
High	None	Q9LKA3	Malate dehydrogenase 2, mitochondrial OS=Arabidopsis thaliana OX=3702 GN=At3g15020 PE=1 SV=1	0	8.881	8	2	2	2	1	341	35.9	8.19	7.36	2	0
High	Master Protein	P49209	60S ribosomal protein L9-1 OS=Arabidopsis thaliana OX=3702 GN=RPL9B PE=1 SV=3	0	8.816	16	2	3	2	1	194	22	9.45	9.13	2	0
High	Master Protein	Q94BS2	Protein MET1, chloroplastic OS=Arabidopsis thaliana OX=3702 GN=MET1 PE=1 SV=1	0	8.8	5	1	2	1	1	335	37.4	8.12	8.38	1	0
High	Master Protein	Q9LFW1	UDP-arabinopyranose mutase 2 OS=Arabidopsis thaliana OX=3702 GN=RGP2 PE=1 SV=1	0	8.762	9	3	3	3	1	360	40.9	6.13	7.99	3	0
High	Master Protein Candidate	Q9SRT9	UDP-arabinopyranose mutase 1 OS=Arabidopsis thaliana OX=3702 GN=RGP1 PE=1 SV=1	0	8.762	9	3	3	3	1	357	40.6	5.92	7.99	3	0
High	None	F4INR3	Cytosol aminopeptidase family protein OS=Arabidopsis thaliana OX=3702 GN=LAP1 PE=1 SV=1	0	8.735	6	2	2	0	2	484	50.6	6.05	6.97	2	0
High	Master Protein	P17094	60S ribosomal protein L3-1 OS=Arabidopsis thaliana OX=3702 GN=ARP1 PE=1 SV=5	0	8.709	9	3	3	3	1	389	44.5	10.17	6.99	3	0
High	Master Protein	O24603	Endochitinase CHI OS=Arabidopsis thaliana OX=3702 GN=CHI PE=2 SV=1	0	8.658	15	3	3	3	1	277	29.8	6.05	9.91	3	0
High	Master Protein	P60040	60S ribosomal protein L7-2 OS=Arabidopsis thaliana OX=3702 GN=RPL7B PE=1 SV=1	0	8.6	20	5	5	5	1	242	28.2	9.94	8.63	5	0
High	Master Protein Candidate	B9DFF8	Tubulin alpha chain OS=Arabidopsis thaliana OX=3702 GN=TUA6 PE=2 SV=1	0	8.586	8	3	3	3	1	427	47.2	8.09	6.14	3	0
High	Master Protein Candidate	P29511	Tubulin alpha-6 chain OS=Arabidopsis thaliana OX=3702 GN=TUBA6 PE=1 SV=1	0	8.586	8	3	3	3	1	450	49.5	5.06	6.14	3	0
High	Master Protein Candidate	B9DHQ0	Tubulin alpha-5 chain OS=Arabidopsis thaliana OX=3702 GN=TUBA5 PE=1 SV=2	0	8.586	8	3	3	3	1	450	49.6	5.1	6.14	3	0
High	Master Protein	B9DGT7	Tubulin alpha-2 chain OS=Arabidopsis thaliana OX=3702 GN=TUBA2 PE=2 SV=2	0	8.586	8	3	3	3	1	450	49.5	5.06	6.14	3	0
High	None	F4JB05	Ribosomal protein S5/Elongation factor G/III/V family protein OS=Arabidopsis thaliana OX=3702 GN=MGH6.2 PE=4 SV=1	0	8.57	7	5	5	5	1	820	90.9	6.1	1.84	5	0
High	None	F4JNE0	Nucleotide-sugar transporter family protein OS=Arabidopsis thaliana OX=3702 GN=NRPD4 PE=4 SV=1	0	8.57	7	5	5	5	1	844	93.3	6.19	1.84	5	0
High	Master Protein	P29197	Chaperonin CPN60, mitochondrial OS=Arabidopsis thaliana OX=3702 GN=CPN60 PE=1 SV=2	0	8.488	7	3	3	3	1	577	61.2	5.78	9	3	0
High	Master Protein	P47998	Cysteine synthase 1 OS=Arabidopsis thaliana OX=3702 GN=OASA1 PE=1 SV=2	0	8.409	16	3	3	3	1	322	33.8	6.14	7.76	3	0
High	Master Protein Candidate	F4IP53	General regulatory factor 9 OS=Arabidopsis thaliana OX=3702 GN=GRF9 PE=3 SV=1	0	8.319	8	2	3	1	1	262	29.4	4.91	9.2	2	0
High	Master Protein	F4IP55	General regulatory factor 9 OS=Arabidopsis thaliana OX=3702 GN=GRF9 PE=1 SV=1	0	8.319	8	2	3	1	1	276	30.9	5.03	9.2	2	0
High	Master Protein Candidate	Q96299	14-3-3-like protein GF14 mu OS=Arabidopsis thaliana OX=3702 GN=GRF9 PE=1 SV=2	0	8.319	8	2	3	1	1	263	29.5	4.91	9.2	2	0
High	Master Protein	P42733	40S ribosomal protein S11-3 OS=Arabidopsis thaliana OX=3702 GN=RPS11C PE=2 SV=2	0	8.317	25	3	3	1	1	159	17.7	10.61	7.61	3	0
High	Master Protein	P0DKC4	Phosphoglycolate phosphatase 1B, chloroplastic OS=Arabidopsis thaliana OX=3702 GN=PGLP1B PE=1 SV=1	0	8.281	9	3	3	3	1	362	39.7	7.25	8.33	3	0
High	None	F4JPJ7	Plasma membrane ATPase OS=Arabidopsis thaliana OX=3702 GN=HA2 PE=1 SV=1	0	8.209	3	2	2	2	1	981	108.2	7.14	5.88	2	0
High	None	P20431	ATPase 3, plasma membrane-type OS=Arabidopsis thaliana OX=3702 GN=AHA3 PE=1 SV=2	0	8.209	3	2	2	2	1	949	104.4	7.18	5.88	2	0
High	None	P19456	ATPase 2, plasma membrane-type OS=Arabidopsis thaliana OX=3702 GN=AHA2 PE=1 SV=2	0	8.209	3	2	2	2	1	948	104.3	6.99	5.88	2	0
High	Master Protein Candidate	F4JWM1	Ribosomal protein S5 domain 2-like superfamily protein OS=Arabidopsis thaliana OX=3702 GN=At5g18380 PE=3 SV=1	0	8.207	18	2	2	1	1	139	16	9.86	7.09	2	0
High	Master Protein	Q42340	40S ribosomal protein S16-3 OS=Arabidopsis thaliana OX=3702 GN=RPS16C PE=2 SV=1	0	8.207	17	2	2	1	1	146	16.6	10.2	7.09	2	1
High	Master Protein Candidate	A8MRX2	Ribosomal protein S5 domain 2-like superfamily protein OS=Arabidopsis thaliana OX=3702 GN=At5g18380 PE=3 SV=1	0	8.207	17	2	2	1	1	144	16.5	9.76	7.09	2	0
High	Master Protein	P21238	Chaperonin 60 subunit alpha 1, chloroplastic OS=Arabidopsis thaliana OX=3702 GN=CPN60A1 PE=1 SV=2	0	8.196	5	3	3	3	1	586	62	5.19	8.54	3	0
High	None	Q0WNZ5	5-methyltetrahydropteroyltriglutamate--homocysteine methyltransferase 3, chloroplastic OS=Arabidopsis thaliana OX=3702 GN=MS3 PE=1 SV=1	0	8.054	3	2	2	0	2	812	90.5	8.05	6.44	2	0
High	Master Protein	Q9FNC4	HAD superfamily, subfamily IIIB acid phosphatase OS=Arabidopsis thaliana OX=3702 GN=MRH10.13 PE=2 SV=1	0	8.048	15	4	4	3	1	272	31	7.91	11.27	4	1
High	Master Protein	O65398	Lactoylglutathione lyase GLX1 OS=Arabidopsis thaliana OX=3702 GN=GLX1 PE=1 SV=1	0	8.026	11	3	3	3	1	283	31.9	5.27	7.12	3	0
High	None	C0Z361	Chaperonin 60 subunit beta 3, chloroplastic OS=Arabidopsis thaliana OX=3702 GN=CPN60B3 PE=1 SV=1	0	7.95	4	2	2	2	1	597	63.3	5.87	6.87	2	0
High	Master Protein	Q9FPF0	Protein DJ-1 homolog A OS=Arabidopsis thaliana OX=3702 GN=DJ1A PE=1 SV=1	0	7.89	7	2	2	2	1	392	41.8	5.41	6.18	2	0
High	None	F4J4W3	40S ribosomal protein SA OS=Arabidopsis thaliana OX=3702 GN=RPSAb PE=1 SV=1	0	7.882	8	2	2	2	1	332	37.3	9.63	5.91	2	0
High	None	Q8H173	40S ribosomal protein Sa-2 OS=Arabidopsis thaliana OX=3702 GN=RPSaB PE=1 SV=2	0	7.882	9	2	2	2	1	280	30.6	5.15	5.91	2	0
High	Master Protein	P56779	Cytochrome b559 subunit alpha OS=Arabidopsis thaliana OX=3702 GN=psbE PE=1 SV=4	0	7.834	37	3	3	3	1	83	9.4	4.94	9.16	3	0
High	Master Protein	Q9SK50	Protein TIC 55, chloroplastic OS=Arabidopsis thaliana OX=3702 GN=TIC55 PE=1 SV=1	0	7.832	9	3	3	3	1	539	60.6	8.69	5.07	3	0
High	None	F4ID91	Glutamine synthetase OS=Arabidopsis thaliana OX=3702 GN=GSR2 PE=1 SV=1	0	7.705	4	1	2	1	1	365	40.4	5.29	7.53	1	0
High	None	Q8LCE1	Glutamine synthetase cytosolic isozyme 1-2 OS=Arabidopsis thaliana OX=3702 GN=GLN1-2 PE=1 SV=2	0	7.705	4	1	2	1	1	356	39.2	5.27	7.53	1	0
High	Master Protein	Q9FXA1	AT1G49750 protein OS=Arabidopsis thaliana OX=3702 GN=At1g49750 PE=2 SV=1	0	7.702	5	2	2	2	1	494	54.4	8.1	6.39	2	0
High	Master Protein	Q9T0P4	Ferredoxin-dependent glutamate synthase 2, chloroplastic OS=Arabidopsis thaliana OX=3702 GN=GLU2 PE=1 SV=2	0	7.682	3	3	3	1	1	1629	177.6	7.01	3.49	3	0
High	Master Protein Candidate	Q9SUI4	Photosystem I reaction center subunit XI, chloroplastic OS=Arabidopsis thaliana OX=3702 GN=PSAL PE=1 SV=2	0	7.653	14	2	2	2	1	219	23	9.85	7.76	2	0
High	Master Protein	A0A1P8B6D0	Photosystem I subunit l OS=Arabidopsis thaliana OX=3702 GN=PSAL PE=4 SV=1	0	7.653	11	2	2	2	1	281	30.4	10.14	7.76	2	0
High	None	O49506	Peroxisomal (S)-2-hydroxy-acid oxidase GLO5 OS=Arabidopsis thaliana OX=3702 GN=GLO5 PE=1 SV=1	0	7.506	8	3	3	1	1	368	40.5	8.31	8.05	3	0
High	Master Protein	O82291	Probable plastid-lipid-associated protein 3, chloroplastic OS=Arabidopsis thaliana OX=3702 GN=PAP3 PE=1 SV=1	0	7.495	9	3	3	3	1	376	40.5	4.55	8.9	3	0
High	None	A0A1I9LT16	Ribosomal protein L18 OS=Arabidopsis thaliana OX=3702 GN=RPL18 PE=4 SV=1	0	7.484	18	2	2	2	1	134	14.8	10.86	7.13	2	0
High	None	P42791	60S ribosomal protein L18-2 OS=Arabidopsis thaliana OX=3702 GN=RPL18B PE=1 SV=2	0	7.484	13	2	2	2	1	187	20.9	10.98	7.13	2	0
High	Master Protein	Q42479	Calcium-dependent protein kinase 3 OS=Arabidopsis thaliana OX=3702 GN=CPK3 PE=1 SV=1	0	7.479	9	3	4	3	1	529	59.3	6.37	2.1	3	0
High	Master Protein	Q9LV33	Beta-glucosidase 44 OS=Arabidopsis thaliana OX=3702 GN=BGLU44 PE=2 SV=1	0	7.461	6	2	2	2	1	512	58.9	9.42	4.95	2	0
High	Master Protein	Q9LVJ1	Subtilisin-like protease SBT1.4 OS=Arabidopsis thaliana OX=3702 GN=SBT1.4 PE=2 SV=1	0	7.257	2	1	2	1	1	777	81.8	6.77	2.23	1	0
High	Master Protein	Q9SPK5	Formate--tetrahydrofolate ligase OS=Arabidopsis thaliana OX=3702 GN=THFS PE=2 SV=1	0	7.247	6	3	4	3	1	634	67.8	6.71	1.67	3	0
High	Master Protein	O49485	D-3-phosphoglycerate dehydrogenase 1, chloroplastic OS=Arabidopsis thaliana OX=3702 GN=PGDH1 PE=1 SV=1	0	7.242	6	3	3	3	1	603	63.3	6.58	8.23	3	0
High	Master Protein	Q9XIE2	ABC transporter G family member 36 OS=Arabidopsis thaliana OX=3702 GN=ABCG36 PE=1 SV=1	0	7.205	2	2	3	2	1	1469	165	7.9	8.81	2	0
High	Master Protein Candidate	P36212	50S ribosomal protein L12-3, chloroplastic OS=Arabidopsis thaliana OX=3702 GN=RPL12C PE=2 SV=2	0	7.113	20	3	3	3	1	187	19.7	5.64	7.73	3	0
High	Master Protein	P36210	50S ribosomal protein L12-1, chloroplastic OS=Arabidopsis thaliana OX=3702 GN=RPL12A PE=2 SV=1	0	7.113	20	3	3	3	1	191	20.1	5.64	7.73	3	0
High	Master Protein	A0A1P8BG37	Photosystem II stability/assembly factor, chloroplast (HCF136) OS=Arabidopsis thaliana OX=3702 GN=HCF136 PE=4 SV=1	0	7.091	6	2	2	2	1	426	46.9	8.03	7.44	2	0
High	Master Protein Candidate	O82660	Photosystem II stability/assembly factor HCF136, chloroplastic OS=Arabidopsis thaliana OX=3702 GN=HCF136 PE=1 SV=1	0	7.091	6	2	2	2	1	403	44.1	7.34	7.44	2	0
High	Master Protein Candidate	F4HQD5	Heat shock protein 70 (Hsp 70) family protein OS=Arabidopsis thaliana OX=3702 GN=Hsp70-15 PE=1 SV=2	0	7.063	4	2	2	2	1	736	81.7	8.65	3.49	2	0
High	Master Protein Candidate	Q9S7C0	Heat shock 70 kDa protein 14 OS=Arabidopsis thaliana OX=3702 GN=HSP70-14 PE=1 SV=1	0	7.063	3	2	2	2	1	831	91.7	5.25	3.49	2	0
High	Master Protein	F4HQD4	Heat shock 70 kDa protein 15 OS=Arabidopsis thaliana OX=3702 GN=HSP70-15 PE=1 SV=1	0	7.063	3	2	2	2	1	831	91.6	5.19	3.49	2	0
High	Master Protein Candidate	A0A2H1ZEG9	Heat shock protein 70 (Hsp 70) family protein OS=Arabidopsis thaliana OX=3702 GN=Hsp70-15 PE=1 SV=1	0	7.063	4	2	2	2	1	736	81.7	8.51	3.49	2	0
High	Master Protein	P43297	Cysteine proteinase RD21A OS=Arabidopsis thaliana OX=3702 GN=RD21A PE=1 SV=1	0	7.047	6	2	2	2	1	462	50.9	5.41	4.34	2	0
High	Master Protein Candidate	F4HXD2	Aldehyde dehydrogenase 10A8 OS=Arabidopsis thaliana OX=3702 GN=ALDH10A8 PE=3 SV=1	0	7.035	4	1	2	1	1	496	53.9	5.35	2.74	1	0
High	Master Protein	Q9S795	Betaine aldehyde dehydrogenase 1, chloroplastic OS=Arabidopsis thaliana OX=3702 GN=ALDH10A8 PE=2 SV=1	0	7.035	4	1	2	1	1	501	54.4	5.29	2.74	1	0
High	Master Protein	F4K5B9	Eukaryotic aspartyl protease family protein OS=Arabidopsis thaliana OX=3702 GN=MOJ9.20 PE=3 SV=1	0	6.994	2	1	2	1	1	455	48.7	9.64	5.94	1	0
High	Master Protein	Q9C5M0	Mitochondrial dicarboxylate/tricarboxylate transporter DTC OS=Arabidopsis thaliana OX=3702 GN=DTC PE=1 SV=1	0	6.918	9	2	2	2	1	298	31.9	9.23	6.28	2	0
High	Master Protein	Q9SK22	40S ribosomal protein S16-1 OS=Arabidopsis thaliana OX=3702 GN=RPS16A PE=2 SV=1	0	6.91	17	2	2	1	1	146	16.6	10.2	6.76	2	0
High	Master Protein	Q94II5	Adenine nucleotide alpha hydrolases-like superfamily protein OS=Arabidopsis thaliana OX=3702 GN=RD2 PE=1 SV=1	0	6.91	17	2	2	2	1	193	21.2	5.62	5.43	2	0
High	Master Protein Candidate	Q9SIJ8	Adenine nucleotide alpha hydrolases-like superfamily protein OS=Arabidopsis thaliana OX=3702 GN=RD2 PE=1 SV=2	0	6.91	18	2	2	2	1	187	20.6	5.62	5.43	2	0
High	None	Q9SSQ9	Phospholipase D alpha 2 OS=Arabidopsis thaliana OX=3702 GN=PLDALPHA2 PE=2 SV=1	0	6.889	3	2	2	2	1	810	91.5	6.24	2.27	2	0
High	Master Protein Rejected	P53496	Actin-11 OS=Arabidopsis thaliana OX=3702 GN=ACT11 PE=1 SV=1	0	6.854	10	3	3	0	0	377	41.6	5.39	7.33	3	0
High	Master Protein	Q9STF2	Protein PLASTID TRANSCRIPTIONALLY ACTIVE 16, chloroplastic OS=Arabidopsis thaliana OX=3702 GN=PTAC16 PE=1 SV=1	0	6.827	5	2	2	2	1	510	54.3	8.91	6.56	2	0
High	Master Protein	P34788	40S ribosomal protein S18 OS=Arabidopsis thaliana OX=3702 GN=RPS18A PE=1 SV=1	0	6.79	18	2	2	2	1	152	17.5	10.54	5.77	2	0
High	Master Protein	P16181	40S ribosomal protein S11-1 OS=Arabidopsis thaliana OX=3702 GN=RPS11A PE=2 SV=1	0	6.786	25	3	3	1	1	160	17.9	10.56	4.87	3	2
High	None	F4IGY6	Chlorophyll a-b binding protein, chloroplastic OS=Arabidopsis thaliana OX=3702 GN=LHCB4.3 PE=3 SV=1	0	6.736	9	2	3	1	1	185	20.2	6.8	8.46	2	0
High	None	F4KHY7	General regulatory factor 8 OS=Arabidopsis thaliana OX=3702 GN=GRF8 PE=3 SV=1	0	6.733	7	2	3	0	4	260	29.5	5.39	7.91	2	0
High	None	P48348	14-3-3-like protein GF14 kappa OS=Arabidopsis thaliana OX=3702 GN=GRF8 PE=1 SV=2	0	6.733	7	2	3	0	4	248	28	4.89	7.91	2	0
High	Master Protein Candidate	Q93VT9	60S ribosomal protein L10-1 OS=Arabidopsis thaliana OX=3702 GN=RPL10A PE=1 SV=1	0	6.72	14	3	3	3	1	220	24.9	10.49	3.23	3	0
High	Master Protein	Q08770	60S ribosomal protein L10-2 OS=Arabidopsis thaliana OX=3702 GN=RPL10B PE=2 SV=2	0	6.72	14	3	3	3	1	221	24.9	10.43	3.23	3	0
High	Master Protein Candidate	A0A1P8AUU3	Ribosomal protein L16p/L10e family protein OS=Arabidopsis thaliana OX=3702 GN=RPL10B PE=4 SV=1	0	6.72	17	3	3	3	1	184	20.5	10.35	3.23	3	0
High	Master Protein	P55229	Glucose-1-phosphate adenylyltransferase large subunit 1, chloroplastic OS=Arabidopsis thaliana OX=3702 GN=ADG2 PE=1 SV=3	0	6.719	4	2	3	2	1	522	57.6	7.91	7.39	2	0
High	Master Protein	O04834	GTP-binding protein SAR1A OS=Arabidopsis thaliana OX=3702 GN=SAR1A PE=2 SV=1	0	6.636	17	2	2	2	1	193	22	7.53	2.85	2	0
High	Master Protein Candidate	Q01474	GTP-binding protein SAR1B OS=Arabidopsis thaliana OX=3702 GN=SAR1B PE=1 SV=1	0	6.636	17	2	2	2	1	193	22	7.05	2.85	2	0
High	Master Protein Candidate	Q8VYP7	Putative Sar1 GTP binding protein OS=Arabidopsis thaliana OX=3702 GN=At3g62560 PE=2 SV=1	0	6.636	17	2	2	2	1	193	21.9	7.05	2.85	2	0
High	None	A8MRV1	Histone H4 OS=Arabidopsis thaliana OX=3702 GN=At1g07660 PE=1 SV=1	0	6.504	35	3	3	3	1	86	9.4	11.21	8.34	3	0
High	Master Protein	Q96266	Glutathione S-transferase F8, chloroplastic OS=Arabidopsis thaliana OX=3702 GN=GSTF8 PE=1 SV=3	0	6.48	11	2	2	2	1	263	29.2	8.5	4.3	2	0
High	Master Protein Candidate	Q9FXI7	Histone H3-like 2 OS=Arabidopsis thaliana OX=3702 GN=MGH3 PE=2 SV=3	0	6.421	7	1	2	1	1	137	15.7	11.44	4.53	1	0
High	Master Protein	Q9FKQ3	Histone H3-like 5 OS=Arabidopsis thaliana OX=3702 GN=At5g65350 PE=2 SV=3	0	6.421	6	1	2	1	1	139	15.6	11.25	4.53	1	0
High	Master Protein Candidate	P59226	Histone H3.2 OS=Arabidopsis thaliana OX=3702 GN=HTR2 PE=1 SV=2	0	6.421	7	1	2	1	1	136	15.3	11.3	4.53	1	0
High	Master Protein Candidate	Q9FX60	Histone H3-like 1 OS=Arabidopsis thaliana OX=3702 GN=At1g13370 PE=2 SV=3	0	6.421	7	1	2	1	1	136	15.3	11.17	4.53	1	0
High	Master Protein	P94072	Germin-like protein subfamily 3 member 3 OS=Arabidopsis thaliana OX=3702 GN=GER3 PE=1 SV=1	0	6.397	11	1	1	1	1	211	21.8	6.76	4.71	1	0
High	Master Protein	Q9MBH2	Protein AIG2 B OS=Arabidopsis thaliana OX=3702 GN=AIG2B PE=2 SV=1	0	6.337	15	2	2	2	1	169	19.5	5.07	5.54	2	0
High	Master Protein	Q9FPJ4	Ras-related protein RABD2b OS=Arabidopsis thaliana OX=3702 GN=RABD2B PE=2 SV=1	0	6.33	13	2	2	2	1	202	22.3	5.43	6.09	2	0
High	Master Protein Candidate	Q9SEH3	Ras-related protein RABD2c OS=Arabidopsis thaliana OX=3702 GN=RABD2C PE=1 SV=1	0	6.33	13	2	2	2	1	202	22.3	5.43	6.09	2	0
High	None	A8MQQ1	Ribosomal protein 1 OS=Arabidopsis thaliana OX=3702 GN=RP1 PE=1 SV=1	0	6.321	9	2	2	2	1	306	35	10.13	4.59	2	0
High	Master Protein	P56780	Photosystem II reaction center protein H OS=Arabidopsis thaliana OX=3702 GN=psbH PE=1 SV=2	0	6.313	15	1	2	1	1	73	7.7	6.55	4.94	1	0
High	None	Q56W28	Glutamate decarboxylase OS=Arabidopsis thaliana OX=3702 GN=GAD2 PE=2 SV=1	0	6.307	8	3	3	3	1	365	41.7	6.47	8.32	3	0
High	None	A0A1P8BAP0	Adenosine kinase 2 OS=Arabidopsis thaliana OX=3702 GN=ADK2 PE=4 SV=1	0	6.277	9	2	2	2	1	292	32	6.24	5.22	2	0
High	None	Q9LZG0	Adenosine kinase 2 OS=Arabidopsis thaliana OX=3702 GN=ADK2 PE=1 SV=1	0	6.277	7	2	2	2	1	345	37.8	5.26	5.22	2	0
High	Master Protein	Q0WNJ6	Clathrin heavy chain 1 OS=Arabidopsis thaliana OX=3702 GN=CHC1 PE=1 SV=1	0	6.252	1	2	2	2	1	1705	193.1	5.4	6.72	2	0
High	Master Protein Candidate	Q0WLB5	Clathrin heavy chain 2 OS=Arabidopsis thaliana OX=3702 GN=CHC2 PE=1 SV=1	0	6.252	1	2	2	2	1	1703	193.1	5.38	6.72	2	0
High	Master Protein	P55228	Glucose-1-phosphate adenylyltransferase small subunit, chloroplastic OS=Arabidopsis thaliana OX=3702 GN=APS1 PE=2 SV=2	0	6.242	5	2	2	2	1	520	56.6	6.57	2.98	2	0
High	Master Protein Candidate	Q96533	Alcohol dehydrogenase class-3 OS=Arabidopsis thaliana OX=3702 GN=ADH2 PE=1 SV=2	0	6.203	7	3	3	3	1	379	40.7	6.95	6.86	3	0
High	Master Protein	F4K7D6	S-(hydroxymethyl)glutathione dehydrogenase OS=Arabidopsis thaliana OX=3702 GN=HOT5 PE=1 SV=1	0	6.203	7	3	3	3	1	391	42	6.95	6.86	3	0
High	Master Protein	Q94A28	Aconitate hydratase 2, mitochondrial OS=Arabidopsis thaliana OX=3702 GN=ACO2 PE=1 SV=3	0	6.2	2	2	2	1	1	995	108.4	7.15	5.89	2	0
High	Master Protein	Q8VZJ2	Probable glucan endo-1,3-beta-glucosidase At4g16260 OS=Arabidopsis thaliana OX=3702 GN=At4g16260 PE=1 SV=1	0	6.18	9	3	3	3	1	344	37.7	6.84	9.04	3	0
High	Master Protein Candidate	A0A1P8B3U2	Glycosyl hydrolase superfamily protein OS=Arabidopsis thaliana OX=3702 GN=At4g16260 PE=3 SV=1	0	6.18	10	3	3	3	1	315	34.6	8.25	9.04	3	0
High	Master Protein Candidate	A0A2H1ZE37	HARMLESS TO OZONE LAYER 1 OS=Arabidopsis thaliana OX=3702 GN=HOL1 PE=1 SV=1	0	6.167	7	2	3	2	1	217	24.1	4.58	0	2	0
High	Master Protein	Q0WP12	Thiocyanate methyltransferase 1 OS=Arabidopsis thaliana OX=3702 GN=HOL1 PE=1 SV=2	0	6.167	7	2	3	2	1	227	25.3	4.82	0	2	0
High	Master Protein	P33154	Pathogenesis-related protein 1 OS=Arabidopsis thaliana OX=3702 GN=At2g14610 PE=1 SV=1	0	6.138	8	1	2	1	1	161	17.7	8.84	6.45	1	0
High	Master Protein	Q9XGM1	V-type proton ATPase subunit D OS=Arabidopsis thaliana OX=3702 GN=VHA-D PE=1 SV=2	0	6.122	8	3	3	3	1	261	29	9.51	8.01	3	0
High	Master Protein	Q94A52	Eukaryotic initiation factor 4A-III homolog OS=Arabidopsis thaliana OX=3702 GN=EIF4A3 PE=1 SV=2	0	6.013	6	2	3	1	1	408	45.8	6.23	5.22	2	0
High	None	Q9LN39	F18O14.31 OS=Arabidopsis thaliana OX=3702 GN=At1g19550 PE=4 SV=1	0	5.943	14	2	2	2	1	153	17.1	5.95	5.43	2	0
High	None	P53497	Actin-12 OS=Arabidopsis thaliana OX=3702 GN=ACT12 PE=1 SV=1	0	5.905	8	2	2	1	1	377	41.8	5.58	5.58	2	0
High	None	P53494	Actin-4 OS=Arabidopsis thaliana OX=3702 GN=ACT4 PE=1 SV=1	0	5.905	8	2	2	1	1	377	41.8	5.58	5.58	2	0
High	Master Protein Candidate	F4JA10	Presequence protease 1 OS=Arabidopsis thaliana OX=3702 GN=PREP1 PE=1 SV=1	0	5.898	2	2	2	2	1	1069	119.7	5.63	6.2	2	0
High	Master Protein	Q9LJL3	Presequence protease 1, chloroplastic/mitochondrial OS=Arabidopsis thaliana OX=3702 GN=PREP1 PE=1 SV=2	0	5.898	2	2	2	2	1	1080	120.9	5.68	6.2	2	0
High	Master Protein	P42761	Glutathione S-transferase F10 OS=Arabidopsis thaliana OX=3702 GN=GSTF10 PE=1 SV=3	0	5.875	11	2	2	2	1	215	24.2	5.67	6.93	2	0
High	Master Protein	Q9FNP8	40S ribosomal protein S19-3 OS=Arabidopsis thaliana OX=3702 GN=RPS19C PE=2 SV=1	0	5.826	17	2	2	1	1	143	15.7	10.21	5.59	2	1
High	Master Protein Candidate	Q9LF30	40S ribosomal protein S19-2 OS=Arabidopsis thaliana OX=3702 GN=RPS19B PE=2 SV=1	0	5.826	17	2	2	1	1	143	15.8	10.14	5.59	2	0
High	Master Protein	F4KHD5	A-kinase anchor-like protein OS=Arabidopsis thaliana OX=3702 GN=MPO12.160 PE=1 SV=1	0	5.798	1	1	1	1	1	2889	322.8	4.3	4.12	1	0
High	Master Protein	Q9SKT0	Protein THYLAKOID FORMATION 1, chloroplastic OS=Arabidopsis thaliana OX=3702 GN=THF1 PE=1 SV=1	0	5.79	8	2	2	2	1	300	33.8	9.13	6.97	2	0
High	Master Protein	Q8LD46	60S ribosomal protein L23a-1 OS=Arabidopsis thaliana OX=3702 GN=RPL23AA PE=2 SV=2	0	5.775	15	2	2	2	1	154	17.4	10.2	6.05	2	0
High	Master Protein Candidate	A8MS83	Ribosomal protein L23AB OS=Arabidopsis thaliana OX=3702 GN=RPL23AB PE=3 SV=1	0	5.775	16	2	2	2	1	148	16.7	10.17	6.05	2	0
High	Master Protein Candidate	Q9M3C3	60S ribosomal protein L23a-2 OS=Arabidopsis thaliana OX=3702 GN=RPL23AB PE=2 SV=1	0	5.775	15	2	2	2	1	154	17.4	10.23	6.05	2	0
High	Master Protein	O22527	Chlorophyllase-1 OS=Arabidopsis thaliana OX=3702 GN=CLH1 PE=1 SV=1	0	5.764	4	1	2	1	1	324	34.8	5.74	6.21	1	0
High	Master Protein	Q9SHG8	At1g17100 OS=Arabidopsis thaliana OX=3702 GN=AtHBP1 PE=2 SV=1	0	5.727	7	1	1	1	1	232	25.4	4.92	4.59	1	0
High	Master Protein	Q9SRH5	Mitochondrial outer membrane protein porin 1 OS=Arabidopsis thaliana OX=3702 GN=VDAC1 PE=1 SV=3	0	5.719	7	1	1	1	1	276	29.4	8.73	2.73	1	0
High	Master Protein Candidate	C0Z2X8	AT1G80380 protein OS=Arabidopsis thaliana OX=3702 GN=At1g80380 PE=2 SV=1	0	5.68	7	2	2	2	1	325	36.8	8.5	5.23	2	0
High	Master Protein Candidate	A0A1P8AMB3	p-loop containing nucleoside triphosphate hydrolases superfamily protein OS=Arabidopsis thaliana OX=3702 GN=At1g80380 PE=4 SV=1	0	5.68	6	2	2	2	1	390	44	5.8	5.23	2	0
High	Master Protein	Q944I4	D-glycerate 3-kinase, chloroplastic OS=Arabidopsis thaliana OX=3702 GN=GLYK PE=1 SV=2	0	5.68	5	2	2	2	1	456	51	7.14	5.23	2	0
High	Master Protein Candidate	A0A1P8AMB5	p-loop containing nucleoside triphosphate hydrolases superfamily protein OS=Arabidopsis thaliana OX=3702 GN=At1g80380 PE=4 SV=1	0	5.68	7	2	2	2	1	323	36.3	6.57	5.23	2	0
High	Master Protein Candidate	F4HS63	p-loop containing nucleoside triphosphate hydrolases superfamily protein OS=Arabidopsis thaliana OX=3702 GN=At1g80380 PE=4 SV=1	0	5.68	5	2	2	2	1	450	50.2	6.73	5.23	2	0
High	None	F4HV96	Eif4a-2 OS=Arabidopsis thaliana OX=3702 GN=EIF4A-2 PE=1 SV=1	0	5.658	6	2	2	1	1	407	46.2	5.68	6.85	2	0
High	None	F4JEL5	Eukaryotic translation initiation factor 4A1 OS=Arabidopsis thaliana OX=3702 GN=EIF4A1 PE=1 SV=1	0	5.658	6	2	2	1	1	407	46.1	5.68	6.85	2	0
High	Master Protein	Q9SIV0	S-alkyl-thiohydroximate lyase SUR1 OS=Arabidopsis thaliana OX=3702 GN=SUR1 PE=1 SV=1	0	5.584	6	2	2	2	1	462	51.1	5.91	4.85	2	0
High	Master Protein	P42699	Plastocyanin major isoform, chloroplastic OS=Arabidopsis thaliana OX=3702 GN=DRT112 PE=1 SV=2	0	5.577	14	1	1	1	1	167	17	5.2	5.34	1	0
High	Master Protein	Q9S831	Photosystem I reaction center subunit IV A, chloroplastic OS=Arabidopsis thaliana OX=3702 GN=PSAE1 PE=1 SV=1	0	5.564	27	2	2	1	1	143	15	9.92	6.31	2	0
High	Master Protein	Q8VZ57	Alpha/beta-Hydrolases superfamily protein OS=Arabidopsis thaliana OX=3702 GN=At1g52510 PE=2 SV=1	0	5.52	5	1	1	1	1	380	41.8	7.05	4.02	1	0
High	Master Protein Candidate	F4ICZ4	Alpha/beta-Hydrolases superfamily protein OS=Arabidopsis thaliana OX=3702 GN=At1g52510 PE=4 SV=2	0	5.52	8	1	1	1	1	236	26.2	5.44	4.02	1	0
High	Master Protein	Q9LS03	Allene oxide cyclase 1, chloroplastic OS=Arabidopsis thaliana OX=3702 GN=AOC1 PE=1 SV=1	0	5.437	8	2	2	2	1	254	27.8	9.09	5.44	2	0
High	None	P04778	Chlorophyll a-b binding protein 1, chloroplastic OS=Arabidopsis thaliana OX=3702 GN=LHCB1.3 PE=1 SV=1	0	5.424	7	2	2	2	1	267	28.2	5.66	6.33	2	0
High	None	Q39142	Chlorophyll a-b binding protein, chloroplastic OS=Arabidopsis thaliana OX=3702 GN=Lhb1B1 PE=1 SV=1	0	5.424	7	2	2	2	1	266	28.2	5.27	6.33	2	0
High	None	Q8VZ87	Chlorophyll a-b binding protein 3, chloroplastic OS=Arabidopsis thaliana OX=3702 GN=LHCB1.2 PE=1 SV=2	0	5.424	7	2	2	2	1	267	28.2	5.43	6.33	2	0
High	None	Q39141	Chlorophyll a-b binding protein, chloroplastic OS=Arabidopsis thaliana OX=3702 GN=Lhb1B2 PE=2 SV=1	0	5.424	7	2	2	2	1	265	28	5.44	6.33	2	0
High	Master Protein	Q8W4S4	V-type proton ATPase subunit a3 OS=Arabidopsis thaliana OX=3702 GN=VHA-a3 PE=1 SV=1	0	5.423	2	1	1	1	1	821	92.8	5.94	5.21	1	0
High	Master Protein	Q9LMQ2	Chlorophyll a-b binding protein, chloroplastic OS=Arabidopsis thaliana OX=3702 GN=CHLOROPHYLL PROTEIN 24 PE=1 SV=1	0	5.38	9	2	2	2	1	258	27.5	7.4	3.07	2	0
High	Master Protein	Q9SGA6	40S ribosomal protein S19-1 OS=Arabidopsis thaliana OX=3702 GN=RPS19A PE=2 SV=1	0	5.37	17	2	2	1	1	143	15.8	10.08	4.52	2	0
High	Master Protein Candidate	P51407	60S acidic ribosomal protein P2-1 OS=Arabidopsis thaliana OX=3702 GN=RPP2A PE=3 SV=2	0	5.352	10	1	2	1	1	115	11.4	4.61	6.42	1	0
High	Master Protein Candidate	F4IGR5	60S acidic ribosomal protein family OS=Arabidopsis thaliana OX=3702 GN=At2g27720 PE=3 SV=1	0	5.352	9	1	2	1	1	127	12.7	4.56	6.42	1	0
High	Master Protein Candidate	A0A1P8B2C7	60S acidic ribosomal protein family OS=Arabidopsis thaliana OX=3702 GN=At2g27720 PE=3 SV=1	0	5.352	13	1	2	1	1	91	9.2	4.41	6.42	1	0
High	Master Protein Candidate	F4IGR3	60S acidic ribosomal protein family OS=Arabidopsis thaliana OX=3702 GN=At2g27710 PE=3 SV=1	0	5.352	12	1	2	1	1	98	10.2	4.68	6.42	1	0
High	Master Protein	F4IGR4	60S acidic ribosomal protein family OS=Arabidopsis thaliana OX=3702 GN=At2g27720 PE=3 SV=1	0	5.352	9	1	2	1	1	130	13	4.53	6.42	1	0
High	Master Protein Candidate	Q9SLF7	60S acidic ribosomal protein P2-2 OS=Arabidopsis thaliana OX=3702 GN=RPP2B PE=1 SV=1	0	5.352	10	1	2	1	1	115	11.4	4.68	6.42	1	0
High	Master Protein	Q9C5R8	2-Cys peroxiredoxin BAS1-like, chloroplastic OS=Arabidopsis thaliana OX=3702 GN=At5g06290 PE=2 SV=3	0	5.342	5	1	1	1	1	273	29.8	5.74	3.6	1	0
High	Master Protein Candidate	A0A1P8BD74	2-cysteine peroxiredoxin B OS=Arabidopsis thaliana OX=3702 GN=2-Cys Prx B PE=4 SV=1	0	5.342	6	1	1	1	1	245	26.7	8.38	3.6	1	0
High	None	Q42534	Pectinesterase 2 OS=Arabidopsis thaliana OX=3702 GN=PME2 PE=2 SV=2	0	5.326	3	1	1	1	1	587	64.1	8.94	3.97	1	0
High	Master Protein	Q9LY74	2-methyl-6-phytyl-1,4-hydroquinone methyltransferase, chloroplastic OS=Arabidopsis thaliana OX=3702 GN=VTE3 PE=1 SV=1	0	5.298	5	1	1	1	1	338	37.9	9.1	4.54	1	0
High	Master Protein	Q96255	Phosphoserine aminotransferase 1, chloroplastic OS=Arabidopsis thaliana OX=3702 GN=PSAT1 PE=1 SV=1	0	5.259	4	1	1	1	1	430	47.3	8.06	4.58	1	0
High	Master Protein Candidate	Q9M9P3	UTP--glucose-1-phosphate uridylyltransferase 2 OS=Arabidopsis thaliana OX=3702 GN=UGP2 PE=1 SV=1	0	5.255	4	2	2	2	1	469	51.7	6.13	3.06	2	0
High	Master Protein	A0A1I9LT02	UTP--glucose-1-phosphate uridylyltransferase OS=Arabidopsis thaliana OX=3702 GN=UGP1 PE=1 SV=1	0	5.255	4	2	2	2	1	478	52.8	6.24	3.06	2	0
High	Master Protein Candidate	A0A1I9LT03	UTP--glucose-1-phosphate uridylyltransferase OS=Arabidopsis thaliana OX=3702 GN=UGP1 PE=1 SV=1	0	5.255	5	2	2	2	1	463	51.1	6.48	3.06	2	0
High	None	Q9C5W6	14-3-3-like protein GF14 iota OS=Arabidopsis thaliana OX=3702 GN=GRF12 PE=2 SV=1	0	5.254	4	1	2	0	6	268	30.5	4.88	5.84	1	0
High	None	Q9S9Z8	14-3-3-like protein GF14 omicron OS=Arabidopsis thaliana OX=3702 GN=GRF11 PE=2 SV=2	0	5.254	4	1	2	0	6	252	28.8	5.01	5.84	1	0
High	None	B3H5Y0	Aconitate hydratase OS=Arabidopsis thaliana OX=3702 GN=ACO1 PE=3 SV=1	0	5.22	2	1	2	1	1	795	86.5	6.61	6.28	1	0
High	Master Protein	Q42406	Peptidyl-prolyl cis-trans isomerase CYP18-4 OS=Arabidopsis thaliana OX=3702 GN=CYP18-4 PE=1 SV=1	0	5.173	10	3	4	1	1	172	18.4	8.69	10.12	3	0
High	Master Protein	Q9SSA5	Peptidyl-prolyl cis-trans isomerase CYP38, chloroplastic OS=Arabidopsis thaliana OX=3702 GN=CYP38 PE=1 SV=1	0	5.161	3	1	1	1	1	437	48	5.16	4.25	1	0
High	Master Protein Candidate	Q940J8	Pectin acetylesterase 7 OS=Arabidopsis thaliana OX=3702 GN=PAE7 PE=2 SV=1	0	5.134	7	2	2	2	1	391	42.1	9.11	4.85	2	0
High	Master Protein Candidate	Q9FH82	Pectin acetylesterase 11 OS=Arabidopsis thaliana OX=3702 GN=PAE11 PE=2 SV=1	0	5.134	7	2	2	2	1	391	42	8.66	4.85	2	0
High	Master Protein	F4JT64	Pectin acetylesterase OS=Arabidopsis thaliana OX=3702 GN=PAE7 PE=3 SV=1	0	5.134	5	2	2	2	1	517	55.8	9.04	4.85	2	0
High	None	Q8H1B3	Probable mediator of RNA polymerase II transcription subunit 37b OS=Arabidopsis thaliana OX=3702 GN=MED37B PE=1 SV=1	0	5.083	3	1	1	1	1	675	75.1	5.05	4.82	1	0
High	Master Protein	Q8H112	PGR5-like protein 1A, chloroplastic OS=Arabidopsis thaliana OX=3702 GN=PGRL1A PE=1 SV=1	0	5.076	7	2	2	2	1	324	35.7	5.29	4.87	2	0
High	Master Protein	Q96251	ATP synthase subunit O, mitochondrial OS=Arabidopsis thaliana OX=3702 GN=At5g13450 PE=1 SV=2	0	5.034	9	2	2	2	1	238	26.3	9.23	5.9	2	0
High	Master Protein	Q9LTM0	Cytochrome P450 71B23 OS=Arabidopsis thaliana OX=3702 GN=CYP71B23 PE=2 SV=1	0	4.994	6	2	2	2	1	501	56.9	6.74	3.88	2	0
High	Master Protein	Q9SAU2	D-ribulose-5-phosphate-3-epimerase OS=Arabidopsis thaliana OX=3702 GN=RPE PE=2 SV=1	0	4.955	6	1	1	1	1	281	30	8.07	4.01	1	0
High	Master Protein	Q56WD9	3-ketoacyl-CoA thiolase 2, peroxisomal OS=Arabidopsis thaliana OX=3702 GN=PED1 PE=1 SV=2	0	4.926	7	2	2	2	1	462	48.5	8.34	5.96	2	0
High	Master Protein Candidate	F4K0T6	Ethylene-dependent gravitropism-deficient and yellow-green-like 2 OS=Arabidopsis thaliana OX=3702 GN=EGY2 PE=4 SV=1	0	4.87	4	1	1	1	1	524	56.4	5.03	3.65	1	0
High	Master Protein Candidate	F4K0T7	Ethylene-dependent gravitropism-deficient and yellow-green-like 2 OS=Arabidopsis thaliana OX=3702 GN=EGY2 PE=4 SV=1	0	4.87	4	1	1	1	1	527	56.8	5.07	3.65	1	0
High	Master Protein	Q9FFK3	Probable zinc metalloprotease EGY2, chloroplastic OS=Arabidopsis thaliana OX=3702 GN=EGY2 PE=3 SV=1	0	4.87	3	1	1	1	1	556	60	5.1	3.65	1	0
High	Master Protein Rejected	Q3E8E5	Putative myrosinase 3 OS=Arabidopsis thaliana OX=3702 GN=TGG3 PE=5 SV=1	0	4.859	4	2	3	0	0	439	50.7	7.93	5.01	2	0
High	Master Protein	F4KHF4	3-ketoacyl-acyl carrier protein synthase I OS=Arabidopsis thaliana OX=3702 GN=KASI PE=1 SV=1	0	4.839	3	1	1	1	1	489	52.1	8.21	3.23	1	0
High	Master Protein Candidate	P52410	3-oxoacyl-[acyl-carrier-protein] synthase I, chloroplastic OS=Arabidopsis thaliana OX=3702 GN=KAS1 PE=1 SV=2	0	4.839	3	1	1	1	1	473	50.4	8.06	3.23	1	0
High	Master Protein	Q9SJ12	Probable ATP synthase 24 kDa subunit, mitochondrial OS=Arabidopsis thaliana OX=3702 GN=At2g21870 PE=1 SV=1	0	4.829	7	1	1	1	1	240	27.6	6.67	3.43	1	0
High	Master Protein Candidate	F4III4	MALE GAMETOPHYTE DEFECTIVE 1 OS=Arabidopsis thaliana OX=3702 GN=MGP1 PE=4 SV=1	0	4.829	7	1	1	1	1	220	25.1	9.01	3.43	1	0
High	Master Protein Candidate	A0A1P8AT46	GATA type zinc finger transcription factor family protein OS=Arabidopsis thaliana OX=3702 GN=WLIM1 PE=4 SV=1	0	4.758	11	1	2	1	1	148	16.3	8.68	2.74	1	0
High	Master Protein	Q94JX5	LIM domain-containing protein WLIM1 OS=Arabidopsis thaliana OX=3702 GN=WLIM1 PE=1 SV=1	0	4.758	9	1	2	1	1	190	21	8.84	2.74	1	0
High	Master Protein	Q93YR3	FAM10 family protein At4g22670 OS=Arabidopsis thaliana OX=3702 GN=At4g22670 PE=1 SV=1	0	4.727	3	1	1	1	1	441	46.6	4.93	3.75	1	0
High	Master Protein Candidate	Q9CAV0	40S ribosomal protein S3a-1 OS=Arabidopsis thaliana OX=3702 GN=RPS3AA PE=1 SV=3	0	4.716	8	2	2	2	1	262	29.8	9.76	4.5	2	0
High	Master Protein	Q42262	40S ribosomal protein S3a-2 OS=Arabidopsis thaliana OX=3702 GN=RPS3AB PE=2 SV=3	0	4.716	8	2	2	2	1	262	29.8	9.74	4.5	2	0
High	None	F4IT48	Ribosomal protein L30/L7 family protein OS=Arabidopsis thaliana OX=3702 GN=At2g44120 PE=4 SV=1	0	4.677	13	4	4	4	1	247	28.5	9.88	4.8	4	0
High	None	P60039	60S ribosomal protein L7-3 OS=Arabidopsis thaliana OX=3702 GN=RPL7C PE=2 SV=1	0	4.677	14	4	4	4	1	242	27.9	9.94	4.8	4	0
High	Master Protein	P09468	ATP synthase epsilon chain, chloroplastic OS=Arabidopsis thaliana OX=3702 GN=atpE PE=1 SV=2	0	4.633	18	2	2	2	1	132	14.5	6.1	5.62	2	0
High	Master Protein Candidate	A8MQH1	Inorganic H pyrophosphatase family protein OS=Arabidopsis thaliana OX=3702 GN=AVP1 PE=1 SV=1	0	4.594	2	1	1	1	1	642	67.7	5.17	4.61	1	0
High	Master Protein	P31414	Pyrophosphate-energized vacuolar membrane proton pump 1 OS=Arabidopsis thaliana OX=3702 GN=AVP1 PE=1 SV=1	0	4.594	2	1	1	1	1	770	80.8	5.26	4.61	1	0
High	Master Protein	Q9FFJ2	Rubredoxin family protein OS=Arabidopsis thaliana OX=3702 GN=ENH1 PE=2 SV=1	0	4.593	7	1	1	1	1	271	28.4	9.57	3.33	1	0
High	Master Protein Candidate	A8MSF2	Rubredoxin family protein OS=Arabidopsis thaliana OX=3702 GN=ENH1 PE=4 SV=1	0	4.593	8	1	1	1	1	224	23.9	9.86	3.33	1	0
High	None	Q93W22	60S ribosomal protein L10-3 OS=Arabidopsis thaliana OX=3702 GN=RPL10C PE=2 SV=1	0	4.568	9	2	2	2	1	221	24.9	10.56	3.23	2	0
High	Master Protein	F4J9G2	Rhodanese/Cell cycle control phosphatase superfamily protein OS=Arabidopsis thaliana OX=3702 GN=At3g59780 PE=4 SV=1	0	4.566	2	1	1	1	1	686	73.9	4.97	4.41	1	0
High	None	Q9LHP1	60S ribosomal protein L7-4 OS=Arabidopsis thaliana OX=3702 GN=RPL7D PE=2 SV=1	0	4.566	10	3	3	3	1	244	28.4	9.95	4.8	3	0
High	Master Protein Candidate	Q8LBI1	60S ribosomal protein L5-1 OS=Arabidopsis thaliana OX=3702 GN=ATL5 PE=1 SV=2	0	4.53	9	2	2	2	1	301	34.3	9.31	5.81	2	0
High	Master Protein	P49227	60S ribosomal protein L5-2 OS=Arabidopsis thaliana OX=3702 GN=RPL5B PE=2 SV=3	0	4.53	9	2	2	2	1	301	34.4	9.17	5.81	2	0
High	Master Protein	Q93V62	AT4g27450/F27G19_50 OS=Arabidopsis thaliana OX=3702 GN=At4g27450 PE=1 SV=1	0	4.512	5	1	1	1	1	250	27.6	5.86	3	1	0
High	None	A0A2H1ZEB8	Ribosomal protein L16p/L10e family protein OS=Arabidopsis thaliana OX=3702 GN=SAC52 PE=4 SV=1	0	4.51	18	2	2	2	1	126	14.4	10.05	3.23	2	0
High	Master Protein	Q9M1R2	Proline--tRNA ligase, cytoplasmic OS=Arabidopsis thaliana OX=3702 GN=At3g62120 PE=1 SV=1	0	4.496	3	1	1	1	1	530	60.7	6.4	4.36	1	0
High	Master Protein Candidate	A0A1I9LNS4	Class II aaRS and biotin synthetases superfamily protein OS=Arabidopsis thaliana OX=3702 GN=At3g62120 PE=1 SV=1	0	4.496	3	1	1	1	1	517	59.1	5.81	4.36	1	0
High	None	A0A1P8B993	Aldolase-type TIM barrel family protein OS=Arabidopsis thaliana OX=3702 GN=GOX3 PE=1 SV=1	0	4.476	7	2	2	0	2	259	29	8.65	5.81	2	0
High	Master Protein Candidate	Q9LZT0	Histone H2B.7 OS=Arabidopsis thaliana OX=3702 GN=At3g46030 PE=1 SV=3	0	4.399	17	2	2	2	1	145	15.9	10.02	3.59	2	0
High	Master Protein	Q9SI96	Histone H2B.3 OS=Arabidopsis thaliana OX=3702 GN=At2g28720 PE=1 SV=3	0	4.399	16	2	2	2	1	151	16.5	9.99	3.59	2	0
High	Master Protein Candidate	Q9LQQ4	Histone H2B.1 OS=Arabidopsis thaliana OX=3702 GN=At1g07790 PE=1 SV=3	0	4.399	16	2	2	2	1	148	16.4	10.05	3.59	2	0
High	Master Protein Candidate	Q9ZUS0	Histone H2B.4 OS=Arabidopsis thaliana OX=3702 GN=At2g37470 PE=1 SV=3	0	4.399	17	2	2	2	1	138	15.1	10.05	3.59	2	0
High	Master Protein Candidate	Q9LZ45	Histone H2B.9 OS=Arabidopsis thaliana OX=3702 GN=At5g02570 PE=1 SV=3	0	4.399	18	2	2	2	1	132	14.5	10.07	3.59	2	0
High	Master Protein Candidate	O23629	Histone H2B.6 OS=Arabidopsis thaliana OX=3702 GN=H2B PE=1 SV=3	0	4.399	16	2	2	2	1	150	16.4	10.02	3.59	2	0
High	Master Protein Candidate	Q9FFC0	Histone H2B.10 OS=Arabidopsis thaliana OX=3702 GN=At5g22880 PE=1 SV=3	0	4.399	17	2	2	2	1	145	15.7	10.05	3.59	2	0
High	Master Protein Candidate	P40283	Histone H2B.11 OS=Arabidopsis thaliana OX=3702 GN=At5g59910 PE=1 SV=5	0	4.399	16	2	2	2	1	150	16.4	9.99	3.59	2	0
High	None	A0A178UAN5	Malate dehydrogenase OS=Arabidopsis thaliana OX=3702 GN=c-NAD-MDH3 PE=3 SV=1	0	4.388	4	1	1	1	1	372	40.8	5.91	4.64	1	0
High	None	Q9FJU0	Malate dehydrogenase 3, cytoplasmic OS=Arabidopsis thaliana OX=3702 GN=MDH3 PE=2 SV=1	0	4.388	5	1	1	1	1	339	36.8	6.1	4.64	1	0
High	Master Protein	Q9SMT7	Oxalate--CoA ligase OS=Arabidopsis thaliana OX=3702 GN=AAE3 PE=1 SV=1	0	4.372	3	1	1	1	1	514	55.5	6.54	3.38	1	0
High	Master Protein Candidate	Q9SUS3	Beta-adaptin-like protein B OS=Arabidopsis thaliana OX=3702 GN=BETAB-AD PE=1 SV=1	0	4.344	2	1	1	1	1	894	99.3	5.05	4.05	1	0
High	Master Protein Candidate	O81742	Beta-adaptin-like protein C OS=Arabidopsis thaliana OX=3702 GN=BETAC-AD PE=1 SV=2	0	4.344	2	1	1	1	1	893	99	5.02	4.05	1	0
High	Master Protein	F4JNZ8	Beta-adaptin-like protein OS=Arabidopsis thaliana OX=3702 GN=At4g11380 PE=1 SV=1	0	4.344	2	1	1	1	1	916	101.9	5.03	4.05	1	0
High	Master Protein	P62090	Photosystem I iron-sulfur center OS=Arabidopsis thaliana OX=3702 GN=psaC PE=3 SV=2	0	4.33	27	2	2	2	1	81	9	7.08	3.91	2	0
High	None	Q7PC86	ABC transporter G family member 35 OS=Arabidopsis thaliana OX=3702 GN=ABCG35 PE=2 SV=1	0	4.308	1	1	2	1	1	1442	162.5	7.9	5.88	1	0
High	Master Protein Candidate	P54609	Cell division control protein 48 homolog A OS=Arabidopsis thaliana OX=3702 GN=CDC48A PE=1 SV=1	0	4.294	2	1	1	1	1	809	89.3	5.25	3.76	1	0
High	Master Protein	Q9SCN8	Cell division control protein 48 homolog D OS=Arabidopsis thaliana OX=3702 GN=CDC48D PE=1 SV=1	0	4.294	2	1	1	1	1	815	90.3	5.16	3.76	1	0
High	Master Protein Candidate	Q9LZF6	Cell division control protein 48 homolog E OS=Arabidopsis thaliana OX=3702 GN=CDC48E PE=2 SV=2	0	4.294	2	1	1	1	1	810	89.9	5.2	3.76	1	0
High	None	O65569	40S ribosomal protein S11-2 OS=Arabidopsis thaliana OX=3702 GN=RPS11B PE=2 SV=2	0	4.282	14	2	2	0	2	159	17.9	10.73	4.87	2	0
High	Master Protein	Q93VP3	Eukaryotic translation initiation factor 5A-2 OS=Arabidopsis thaliana OX=3702 GN=ELF5A-2 PE=1 SV=1	0	4.28	12	1	1	1	1	159	17.1	5.94	3.02	1	0
High	Master Protein Candidate	Q9C505	Eukaryotic translation initiation factor 5A-3 OS=Arabidopsis thaliana OX=3702 GN=ELF5A-3 PE=2 SV=1	0	4.28	12	1	1	1	1	158	17.2	5.94	3.02	1	0
High	Master Protein Candidate	Q9XI91	Eukaryotic translation initiation factor 5A-1 OS=Arabidopsis thaliana OX=3702 GN=ELF5A-1 PE=1 SV=1	0	4.28	12	1	1	1	1	158	17.4	5.76	3.02	1	0
High	Master Protein	Q9SX77	Succinate dehydrogenase subunit 5, mitochondrial OS=Arabidopsis thaliana OX=3702 GN=SDH5 PE=1 SV=1	0	4.276	6	1	1	1	1	257	28.1	6.65	4.73	1	0
High	None	Q9SAE4	Cytochrome P450 71B29 OS=Arabidopsis thaliana OX=3702 GN=CYP71B29 PE=3 SV=1	0	4.259	3	1	1	1	1	490	56	7.99	3.88	1	0
High	None	Q9ZU07	Cytochrome P450 71B12 OS=Arabidopsis thaliana OX=3702 GN=CYP71B12 PE=2 SV=1	0	4.259	3	1	1	1	1	496	56.7	9.04	3.88	1	0
High	None	P58050	Cytochrome P450 71B13 OS=Arabidopsis thaliana OX=3702 GN=CYP71B13 PE=2 SV=1	0	4.259	3	1	1	1	1	496	56.4	8.62	3.88	1	0
High	None	Q96514	Cytochrome P450 71B7 OS=Arabidopsis thaliana OX=3702 GN=CYP71B7 PE=1 SV=1	0	4.259	3	1	1	1	1	504	57.2	8.22	3.88	1	0
High	None	Q9SAE3	Cytochrome P450 71B28 OS=Arabidopsis thaliana OX=3702 GN=CYP71B28 PE=2 SV=1	0	4.259	3	1	1	1	1	490	56.5	7.03	3.88	1	0
High	Master Protein Candidate	O65390	Aspartic proteinase A1 OS=Arabidopsis thaliana OX=3702 GN=APA1 PE=1 SV=1	0	4.252	4	1	1	1	1	506	54.6	5.54	3.37	1	0
High	Master Protein	A0A1P8AV08	Aspartic proteinase A1 OS=Arabidopsis thaliana OX=3702 GN=APA1 PE=3 SV=1	0	4.252	4	1	1	1	1	517	56	5.67	3.37	1	0
High	Master Protein	Q9MAK9	26S proteasome regulatory subunit S10B homolog B OS=Arabidopsis thaliana OX=3702 GN=RPT4B PE=1 SV=1	0	4.219	7	2	2	2	1	399	44.7	8.19	5.92	2	0
High	Master Protein Candidate	B3H533	AAA-type ATPase family protein OS=Arabidopsis thaliana OX=3702 GN=At1g45000 PE=4 SV=1	0	4.219	8	2	2	2	1	335	37.5	8.21	5.92	2	0
High	Master Protein Candidate	Q9SEI3	26S proteasome regulatory subunit 10B homolog A OS=Arabidopsis thaliana OX=3702 GN=RPT4A PE=1 SV=1	0	4.219	7	2	2	2	1	399	44.8	8.19	5.92	2	0
High	Master Protein Candidate	Q9SIH0	40S ribosomal protein S14-1 OS=Arabidopsis thaliana OX=3702 GN=RPS14A PE=1 SV=1	0	4.178	9	1	1	1	1	150	16.2	10.59	2.73	1	0
High	Master Protein Candidate	Q9CAX6	40S ribosomal protein S14-2 OS=Arabidopsis thaliana OX=3702 GN=RPS14B PE=1 SV=1	0	4.178	9	1	1	1	1	150	16.3	10.59	2.73	1	0
High	Master Protein	P42036	40S ribosomal protein S14-3 OS=Arabidopsis thaliana OX=3702 GN=RPS14C PE=2 SV=2	0	4.178	9	1	1	1	1	150	16.2	10.59	2.73	1	0
High	Master Protein	P43333	U2 small nuclear ribonucleoprotein A' OS=Arabidopsis thaliana OX=3702 GN=At1g09760 PE=2 SV=2	0	4.173	6	1	1	1	1	249	28	6.05	3.81	1	0
High	Master Protein	B9DFR6	Cysteine synthase OS=Arabidopsis thaliana OX=3702 GN=OASC PE=2 SV=1	0	4.154	3	1	1	1	1	433	46.1	8.37	3.28	1	0
High	Master Protein Candidate	P47999	Cysteine synthase, chloroplastic/chromoplastic OS=Arabidopsis thaliana OX=3702 GN=OASB PE=1 SV=2	0	4.154	3	1	1	1	1	392	41.6	8.02	3.28	1	0
High	Master Protein Candidate	Q43725	Cysteine synthase, mitochondrial OS=Arabidopsis thaliana OX=3702 GN=OASC PE=1 SV=3	0	4.154	3	1	1	1	1	430	45.8	8.18	3.28	1	0
High	Master Protein Candidate	Q2V4Q4	AT1G07320 protein OS=Arabidopsis thaliana OX=3702 GN=RPL4 PE=2 SV=1	0	4.146	4	1	1	1	1	278	30.1	9.26	2.97	1	0
High	Master Protein Candidate	Q3EDH2	Ribosomal protein L4 OS=Arabidopsis thaliana OX=3702 GN=RPL4 PE=3 SV=1	0	4.146	4	1	1	1	1	280	30.4	8.94	2.97	1	0
High	Master Protein	O50061	50S ribosomal protein L4, chloroplastic OS=Arabidopsis thaliana OX=3702 GN=RPL4 PE=2 SV=2	0	4.146	4	1	1	1	1	282	30.5	8.94	2.97	1	0
High	Master Protein	Q940G5	Glucose-6-phosphate 1-epimerase OS=Arabidopsis thaliana OX=3702 GN=At4g25900 PE=2 SV=1	0	4.11	6	2	2	2	1	318	36.2	9.66	4.77	2	0
High	None	A0A1P8AUX6	Glutathione S-transferase TAU 23 OS=Arabidopsis thaliana OX=3702 GN=GSTU23 PE=4 SV=1	0	4.09	6	1	1	1	1	193	22.6	5.73	3.11	1	0
High	None	Q9M9F1	Glutathione S-transferase U23 OS=Arabidopsis thaliana OX=3702 GN=GSTU23 PE=1 SV=1	0	4.09	5	1	1	1	1	220	25.7	5.29	3.11	1	0
High	Master Protein	O65660	PLAT domain-containing protein 1 OS=Arabidopsis thaliana OX=3702 GN=PLAT1 PE=1 SV=1	0	4.078	7	1	1	1	1	181	20.1	5.19	2.61	1	0
High	None	Q9FIF3	40S ribosomal protein S8-2 OS=Arabidopsis thaliana OX=3702 GN=RPS8B PE=2 SV=1	0	4.077	6	1	1	1	1	210	23.8	10.49	3.51	1	0
High	Master Protein	Q9LXQ2	At3g44100 OS=Arabidopsis thaliana OX=3702 GN=F26G5_50 PE=2 SV=1	0	4.057	10	1	1	1	1	152	16.1	8.18	2.4	1	0
High	Master Protein	P42794	60S ribosomal protein L11-2 OS=Arabidopsis thaliana OX=3702 GN=RPL11B PE=2 SV=2	0	4.041	8	1	1	1	1	182	20.8	9.92	3.3	1	0
High	Master Protein Candidate	P42795	60S ribosomal protein L11-1 OS=Arabidopsis thaliana OX=3702 GN=RPL11A PE=2 SV=2	0	4.041	8	1	1	1	1	182	20.8	9.92	3.3	1	0
High	Master Protein	O80840	Phosphomannomutase OS=Arabidopsis thaliana OX=3702 GN=PMM PE=1 SV=1	0	4.036	11	2	2	2	1	246	27.7	5.54	2.97	2	0
High	Master Protein	Q9SUI6	Photosystem I reaction center subunit VI-2, chloroplastic OS=Arabidopsis thaliana OX=3702 GN=PSAH2 PE=2 SV=1	0	4.029	8	1	1	1	1	145	15.3	9.91	3.67	1	0
High	Master Protein Candidate	Q9SUI7	Photosystem I reaction center subunit VI-1, chloroplastic OS=Arabidopsis thaliana OX=3702 GN=PSAH1 PE=2 SV=1	0	4.029	8	1	1	1	1	145	15.2	9.95	3.67	1	0
High	Master Protein Candidate	F4JFY4	Stromal ascorbate peroxidase OS=Arabidopsis thaliana OX=3702 GN=SAPX PE=3 SV=1	0	3.97	7	2	2	1	1	346	37.4	9.06	4.52	2	0
High	Master Protein Candidate	F4JFY5	Stromal ascorbate peroxidase OS=Arabidopsis thaliana OX=3702 GN=SAPX PE=3 SV=1	0	3.97	6	2	2	1	1	371	40.3	7.94	4.52	2	0
High	Master Protein	Q42592	L-ascorbate peroxidase S, chloroplastic/mitochondrial OS=Arabidopsis thaliana OX=3702 GN=APXS PE=1 SV=2	0	3.97	6	2	2	1	1	372	40.4	8.28	4.52	2	0
High	Master Protein	P49200	40S ribosomal protein S20-1 OS=Arabidopsis thaliana OX=3702 GN=RPS20A PE=2 SV=2	0	3.958	10	1	1	1	1	124	13.9	9.72	3.21	1	0
High	Master Protein	Q9LKR8	Rubisco accumulation factor 1.1, chloroplastic OS=Arabidopsis thaliana OX=3702 GN=RAF1.1 PE=1 SV=1	0	3.922	3	1	1	1	1	434	48.2	5.07	3.1	1	0
High	Master Protein Candidate	Q1WIQ6	NADP-dependent glyceraldehyde-3-phosphate dehydrogenase OS=Arabidopsis thaliana OX=3702 GN=ALDH11A3 PE=1 SV=2	0	3.918	3	1	1	1	1	496	53	6.64	3.08	1	0
High	Master Protein	A0A2H1ZE23	Aldehyde dehydrogenase 11A3 OS=Arabidopsis thaliana OX=3702 GN=ALDH11A3 PE=1 SV=1	0	3.918	3	1	1	1	1	536	57.7	7.23	3.08	1	0
High	Master Protein Candidate	F4INS6	Aldehyde dehydrogenase 11A3 OS=Arabidopsis thaliana OX=3702 GN=ALDH11A3 PE=1 SV=1	0	3.918	3	1	1	1	1	503	53.8	6.64	3.08	1	0
High	Master Protein	O80526	ATP-citrate synthase alpha chain protein 3 OS=Arabidopsis thaliana OX=3702 GN=ACLA-3 PE=2 SV=1	0	3.902	3	1	1	1	1	424	46.9	5.26	3.08	1	0
High	Master Protein Candidate	P59224	40S ribosomal protein S13-2 OS=Arabidopsis thaliana OX=3702 GN=RPS13B PE=2 SV=1	0	3.887	15	2	2	2	1	151	17.1	10.39	5.39	2	0
High	Master Protein	P59223	40S ribosomal protein S13-1 OS=Arabidopsis thaliana OX=3702 GN=RPS13A PE=2 SV=1	0	3.887	15	2	2	2	1	151	17.1	10.39	5.39	2	0
High	Master Protein	Q9ZU52	Fructose-bisphosphate aldolase 3, chloroplastic OS=Arabidopsis thaliana OX=3702 GN=FBA3 PE=1 SV=1	0	3.85	3	1	1	1	1	391	42.3	8.09	3.57	1	0
High	Master Protein	F4I3J0	Obg-like ATPase 1 OS=Arabidopsis thaliana OX=3702 GN=At1g56050 PE=3 SV=1	0	3.849	4	1	1	1	1	421	45.6	5.97	3.14	1	0
High	Master Protein	Q9SJI7	Phospholipase A1-IIdelta OS=Arabidopsis thaliana OX=3702 GN=At2g42690 PE=1 SV=1	0	3.837	3	1	1	1	1	412	46	5.25	3.35	1	0
High	Master Protein	Q9ZPI6	Peroxisomal fatty acid beta-oxidation multifunctional protein AIM1 OS=Arabidopsis thaliana OX=3702 GN=AIM1 PE=1 SV=1	0	3.837	2	1	1	1	1	721	77.8	9.32	2.46	1	0
High	Master Protein	Q9SJT9	Coatomer subunit alpha-2 OS=Arabidopsis thaliana OX=3702 GN=At2g21390 PE=2 SV=1	0	3.831	1	1	1	1	1	1218	136.4	6.92	4.18	1	0
High	Master Protein	Q42347	60S ribosomal protein L24-1 OS=Arabidopsis thaliana OX=3702 GN=RPL24A PE=1 SV=2	0	3.787	7	1	1	1	1	164	18.8	10.7	3.37	1	0
High	Master Protein Candidate	P38666	60S ribosomal protein L24-2 OS=Arabidopsis thaliana OX=3702 GN=RPL24B PE=1 SV=2	0	3.787	7	1	1	1	1	163	18.6	10.78	3.37	1	0
High	Master Protein	P43286	Aquaporin PIP2-1 OS=Arabidopsis thaliana OX=3702 GN=PIP2-1 PE=1 SV=1	0	3.78	8	2	2	2	1	287	30.5	8.4	4.47	2	0
High	Master Protein	P52901	Pyruvate dehydrogenase E1 component subunit alpha-1, mitochondrial OS=Arabidopsis thaliana OX=3702 GN=E1 ALPHA PE=1 SV=2	0	3.743	4	1	1	1	1	389	43	7.49	3.74	1	0
High	Master Protein Candidate	A0A1P8AQS2	Pyruvate dehydrogenase E1 component subunit alpha OS=Arabidopsis thaliana OX=3702 GN=E1 ALPHA PE=1 SV=1	0	3.743	4	1	1	1	1	378	41.9	7.3	3.74	1	0
High	Master Protein	Q41963	Aquaporin TIP1-2 OS=Arabidopsis thaliana OX=3702 GN=TIP1-2 PE=1 SV=2	0	3.738	7	1	1	1	1	253	25.8	5.06	0	1	0
High	Master Protein	O65686	30S ribosomal protein S16-1, chloroplastic OS=Arabidopsis thaliana OX=3702 GN=RPS16-1 PE=2 SV=1	0	3.727	12	1	1	1	1	113	12.7	9.8	3.8	1	0
High	None	Q94C74	Serine hydroxymethyltransferase 2, mitochondrial OS=Arabidopsis thaliana OX=3702 GN=SHM2 PE=1 SV=2	0	3.721	2	1	1	1	1	517	57.3	8.75	3.07	1	0
High	Master Protein	O80576	At2g44060 OS=Arabidopsis thaliana OX=3702 GN=late embryogenesis abundant 26 PE=2 SV=1	0	3.714	7	2	2	2	1	325	36	4.84	4.81	2	0
High	Master Protein	Q949U7	Peroxiredoxin-2E, chloroplastic OS=Arabidopsis thaliana OX=3702 GN=PRXIIE PE=1 SV=2	0	3.701	5	1	1	1	1	234	24.7	9.03	2.64	1	0
High	Master Protein	Q38946	Glutamate dehydrogenase 2 OS=Arabidopsis thaliana OX=3702 GN=GDH2 PE=1 SV=1	0	3.676	5	2	2	2	1	411	44.7	6.54	5.5	2	0
High	Master Protein	Q94F00	Phosphatase IMPL1, chloroplastic OS=Arabidopsis thaliana OX=3702 GN=IMPL1 PE=1 SV=2	0	3.676	5	1	1	1	1	371	40.4	7.24	2.66	1	0
High	None	Q56ZI2	Patellin-2 OS=Arabidopsis thaliana OX=3702 GN=PATL2 PE=1 SV=2	0	3.673	1	1	1	1	1	683	76	4.92	2.57	1	0
High	None	A0A1P8ANK1	PATELLIN 2 OS=Arabidopsis thaliana OX=3702 GN=PATL2 PE=1 SV=1	0	3.673	2	1	1	1	1	649	72.3	4.97	2.57	1	0
High	Master Protein	A0A2P2CLH9	ATPase subunit 4 OS=Arabidopsis thaliana OX=3702 GN=atp4 PE=4 SV=1	0	3.659	6	1	1	1	1	192	21.7	9.54	2.7	1	0
High	Master Protein Candidate	Q04613	ATP synthase protein MI25 OS=Arabidopsis thaliana OX=3702 GN=AtMg00640 PE=1 SV=2	0	3.659	6	1	1	1	1	192	21.7	9.39	2.7	1	0
High	Master Protein	O65282	20 kDa chaperonin, chloroplastic OS=Arabidopsis thaliana OX=3702 GN=CPN20 PE=1 SV=2	0	3.655	5	1	1	1	1	253	26.8	8.88	3.06	1	0
High	Master Protein Candidate	F4JTD3	RNA binding Plectin/S10 domain-containing protein OS=Arabidopsis thaliana OX=3702 GN=At4g25740 PE=4 SV=1	0	3.591	10	1	1	1	1	149	16.4	9.48	3.17	1	0
High	Master Protein Candidate	Q9SW09	40S ribosomal protein S10-1 OS=Arabidopsis thaliana OX=3702 GN=RPS10A PE=2 SV=1	0	3.591	8	1	1	1	1	177	19.4	9.67	3.17	1	0
High	Master Protein	Q9LTF2	40S ribosomal protein S10-3 OS=Arabidopsis thaliana OX=3702 GN=RPS10C PE=2 SV=2	0	3.591	8	1	1	1	1	179	19.5	9.61	3.17	1	0
High	Master Protein	Q8VZC3	Delta-1-pyrroline-5-carboxylate dehydrogenase 12A1, mitochondrial OS=Arabidopsis thaliana OX=3702 GN=ALDH12A1 PE=2 SV=1	0	3.538	2	1	1	1	1	556	61.7	6.73	3.51	1	0
High	Master Protein	Q9CA67	Geranylgeranyl diphosphate reductase, chloroplastic OS=Arabidopsis thaliana OX=3702 GN=CHLP PE=1 SV=1	0	3.515	3	1	2	1	1	467	51.8	8.91	1.73	1	0
High	Master Protein Candidate	F4JWF7	DEAD/DEAH box RNA helicase family protein OS=Arabidopsis thaliana OX=3702 GN=UAP56b PE=4 SV=1	0	3.513	2	1	1	1	1	468	52.8	5.92	2.73	1	0
High	Master Protein Candidate	Q9LFN6	DEAD-box ATP-dependent RNA helicase 56 OS=Arabidopsis thaliana OX=3702 GN=RH56 PE=1 SV=2	0	3.513	2	1	1	1	1	427	48.3	5.64	2.73	1	0
High	Master Protein	F4JWF6	DEAD/DEAH box RNA helicase family protein OS=Arabidopsis thaliana OX=3702 GN=UAP56b PE=4 SV=1	0	3.513	2	1	1	1	1	486	55.4	5.92	2.73	1	0
High	Master Protein Candidate	F4JWF3	DEAD/DEAH box RNA helicase family protein OS=Arabidopsis thaliana OX=3702 GN=UAP56a PE=4 SV=1	0	3.513	3	1	1	1	1	344	39.1	6.84	2.73	1	0
High	Master Protein	Q9ZVA4	EP1-like glycoprotein 3 OS=Arabidopsis thaliana OX=3702 GN=At1g78850 PE=1 SV=1	0	3.511	5	2	2	2	1	441	49	7.65	2.41	2	0
High	Master Protein	Q941D3	Probable plastid-lipid-associated protein 8, chloroplastic OS=Arabidopsis thaliana OX=3702 GN=PAP8 PE=1 SV=1	0	3.496	5	1	1	1	1	239	26.5	9.47	3.09	1	0
High	Master Protein Candidate	F4K2P2	Plastid-lipid associated protein PAP / fibrillin family protein OS=Arabidopsis thaliana OX=3702 GN=At5g19940 PE=1 SV=1	0	3.496	6	1	1	1	1	235	26	9.33	3.09	1	0
High	Master Protein Candidate	F4IL52	Thioredoxin family protein OS=Arabidopsis thaliana OX=3702 GN=UNE5 PE=3 SV=1	0	3.449	4	1	1	1	1	323	35.6	6	2.87	1	0
High	Master Protein	O22263	Protein disulfide-isomerase like 2-1 OS=Arabidopsis thaliana OX=3702 GN=PDIL2-1 PE=2 SV=1	0	3.449	3	1	1	1	1	361	39.5	6.06	2.87	1	0
High	Master Protein Candidate	A8MSC5	AT2G47470 protein OS=Arabidopsis thaliana OX=3702 GN=UNE5 PE=2 SV=1	0	3.449	4	1	1	1	1	335	36.5	5.67	2.87	1	0
High	None	Q9LFF6	Histone H2B.8 OS=Arabidopsis thaliana OX=3702 GN=At3g53650 PE=1 SV=3	0	3.44	11	1	1	1	1	138	15.2	10.08	3.59	1	0
High	Master Protein Candidate	A0A1P8ASZ4	Mitogen-activated protein kinase OS=Arabidopsis thaliana OX=3702 GN=MPK11 PE=3 SV=1	0	3.426	5	1	1	1	1	346	39.6	7.52	2.99	1	0
High	Master Protein	Q39024	Mitogen-activated protein kinase 4 OS=Arabidopsis thaliana OX=3702 GN=MPK4 PE=1 SV=2	0	3.426	5	1	1	1	1	376	42.8	6.11	2.99	1	0
High	Master Protein Candidate	Q9LMM5	Mitogen-activated protein kinase 11 OS=Arabidopsis thaliana OX=3702 GN=MPK11 PE=1 SV=1	0	3.426	5	1	1	1	1	369	42.4	6.47	2.99	1	0
High	Master Protein	Q9LT39	Leucine-rich repeat (LRR) family protein OS=Arabidopsis thaliana OX=3702 GN=At3g20820 PE=2 SV=1	0	3.41	3	1	1	1	1	365	39.8	8.41	2.86	1	0
High	Master Protein	Q94F10	Transmembrane protein, putative (DUF1118) OS=Arabidopsis thaliana OX=3702 GN=At1g74730 PE=1 SV=1	0	3.391	7	1	1	1	1	198	20.7	9.31	2.77	1	0
High	Master Protein	P93303	ATP synthase protein YMF19 OS=Arabidopsis thaliana OX=3702 GN=YMF19 PE=1 SV=1	0	3.376	8	1	1	1	1	158	18.2	9.61	3.36	1	0
High	Master Protein	Q9LMG7	Probable inactive purple acid phosphatase 2 OS=Arabidopsis thaliana OX=3702 GN=PAP2 PE=2 SV=1	0	3.375	2	1	1	1	1	656	73.7	6.18	3.26	1	0
High	Master Protein Candidate	P29514	Tubulin beta-6 chain OS=Arabidopsis thaliana OX=3702 GN=TUBB6 PE=2 SV=1	0	3.374	2	1	1	1	1	449	50.6	4.82	3.58	1	0
High	Master Protein Candidate	P12411	Tubulin beta-1 chain OS=Arabidopsis thaliana OX=3702 GN=TUBB1 PE=2 SV=1	0	3.374	2	1	1	1	1	447	50.2	4.79	3.58	1	0
High	Master Protein Candidate	P29517	Tubulin beta-9 chain OS=Arabidopsis thaliana OX=3702 GN=TUBB9 PE=1 SV=1	0	3.374	2	1	1	1	1	444	49.6	4.78	3.58	1	0
High	Master Protein Candidate	P29515	Tubulin beta-7 chain OS=Arabidopsis thaliana OX=3702 GN=TUBB7 PE=2 SV=1	0	3.374	2	1	1	1	1	449	50.7	4.83	3.58	1	0
High	Master Protein Candidate	P29513	Tubulin beta-5 chain OS=Arabidopsis thaliana OX=3702 GN=TUBB5 PE=2 SV=1	0	3.374	2	1	1	1	1	449	50.3	4.77	3.58	1	0
High	Master Protein	Q56YW9	Tubulin beta-2 chain OS=Arabidopsis thaliana OX=3702 GN=TUBB2 PE=2 SV=2	0	3.374	2	1	1	1	1	450	50.7	4.81	3.58	1	0
High	Master Protein Candidate	P29516	Tubulin beta-8 chain OS=Arabidopsis thaliana OX=3702 GN=TUBB8 PE=2 SV=2	0	3.374	2	1	1	1	1	449	50.6	4.83	3.58	1	0
High	Master Protein Candidate	P24636	Tubulin beta-4 chain OS=Arabidopsis thaliana OX=3702 GN=TUBB4 PE=2 SV=2	0	3.374	2	1	1	1	1	444	49.8	4.86	3.58	1	0
High	Master Protein	Q02166	Anthranilate phosphoribosyltransferase, chloroplastic OS=Arabidopsis thaliana OX=3702 GN=PAT1 PE=2 SV=1	0	3.366	3	1	1	1	1	444	46.5	7.27	2.81	1	0
High	None	F4IVR2	Heat shock protein 60-2 OS=Arabidopsis thaliana OX=3702 GN=HSP60-2 PE=1 SV=1	0	3.362	3	2	2	2	1	580	61.4	6.33	4.98	2	0
High	None	Q8L7B5	Chaperonin CPN60-like 1, mitochondrial OS=Arabidopsis thaliana OX=3702 GN=At2g33210 PE=1 SV=1	0	3.362	3	2	2	2	1	585	61.9	6.68	4.98	2	0
High	Master Protein	Q9SR73	40S ribosomal protein S28-1 OS=Arabidopsis thaliana OX=3702 GN=RPS28A PE=3 SV=1	0	3.35	19	1	1	1	1	64	7.4	10.83	3.46	1	0
High	Master Protein	Q07488	Blue copper protein OS=Arabidopsis thaliana OX=3702 GN=BCB PE=2 SV=2	0	3.338	7	1	2	1	1	196	20	4.82	0	1	0
High	Master Protein	Q9ZQ26	AT2G24420 protein OS=Arabidopsis thaliana OX=3702 GN=At2g24420 PE=2 SV=2	0	3.335	3	1	1	1	1	440	50.3	9.33	2.61	1	0
High	Master Protein	P56791	50S ribosomal protein L2, chloroplastic OS=Arabidopsis thaliana OX=3702 GN=rpl2-A PE=3 SV=1	0	3.333	6	1	1	1	1	274	29.8	10.84	0	1	0
High	None	A0A1P8BBQ0	Peroxisomal NAD-malate dehydrogenase 2 OS=Arabidopsis thaliana OX=3702 GN=PMDH2 PE=3 SV=1	0	3.331	3	1	1	1	1	353	37.2	7.99	3.18	1	0
High	Master Protein Candidate	F4JWS9	Cytochrome b-c1 complex subunit 7 OS=Arabidopsis thaliana OX=3702 GN=At5g25450 PE=3 SV=1	0	3.329	10	1	1	1	1	106	12.8	9.91	3.07	1	0
High	Master Protein Candidate	Q9SUU5	Cytochrome b-c1 complex subunit 7-1 OS=Arabidopsis thaliana OX=3702 GN=QCR7-1 PE=1 SV=1	0	3.329	9	1	1	1	1	122	14.5	9.73	3.07	1	0
High	Master Protein	F4JWS8	Cytochrome b-c1 complex subunit 7-2 OS=Arabidopsis thaliana OX=3702 GN=QCR7-2 PE=1 SV=1	0	3.329	9	1	1	1	1	122	14.6	9.83	3.07	1	0
High	None	Q9LV11	ATPase 11, plasma membrane-type OS=Arabidopsis thaliana OX=3702 GN=AHA11 PE=1 SV=1	0	3.328	2	1	1	1	1	956	105.1	6.6	2.43	1	0
High	None	Q43128	ATPase 10, plasma membrane-type OS=Arabidopsis thaliana OX=3702 GN=AHA10 PE=2 SV=2	0	3.328	2	1	1	1	1	947	104.7	6.43	2.43	1	0
High	None	Q9SU58	ATPase 4, plasma membrane-type OS=Arabidopsis thaliana OX=3702 GN=AHA4 PE=2 SV=2	0	3.328	2	1	1	1	1	960	105.7	6.52	2.43	1	0
High	None	Q9M2A0	ATPase 8, plasma membrane-type OS=Arabidopsis thaliana OX=3702 GN=AHA8 PE=3 SV=1	0	3.328	2	1	1	1	1	948	104.1	5.77	2.43	1	0
High	None	A0A1P8BD43	Plasma membrane ATPase OS=Arabidopsis thaliana OX=3702 GN=HA3 PE=1 SV=1	0	3.328	2	1	1	1	1	687	76.6	9.06	2.43	1	0
High	None	Q3E6Q3	Ras-related small GTP-binding family protein OS=Arabidopsis thaliana OX=3702 GN=At1g02620 PE=4 SV=1	0	3.328	11	1	1	1	1	122	13.8	5.07	2.85	1	0
High	Master Protein Candidate	Q9LR33	60S ribosomal protein L27a-2 OS=Arabidopsis thaliana OX=3702 GN=RPL27AB PE=2 SV=1	0	3.323	8	1	1	1	1	146	16.3	10.51	2.83	1	0
High	Master Protein	P49637	60S ribosomal protein L27a-3 OS=Arabidopsis thaliana OX=3702 GN=RPL27AC PE=2 SV=2	0	3.323	8	1	1	1	1	146	16.4	10.59	2.83	1	0
High	None	O80489	Putative GTP-binding protein, SAR1B OS=Arabidopsis thaliana OX=3702 GN=ATSAR1 PE=2 SV=1	0	3.308	10	1	1	1	1	193	22	6.54	0	1	0
High	Master Protein	Q949Y3	Bifunctional purple acid phosphatase 26 OS=Arabidopsis thaliana OX=3702 GN=PAP26 PE=1 SV=1	0	3.301	4	1	1	1	1	475	55	7.31	0	1	0
High	Master Protein	Q9LSE4	Protein COFACTOR ASSEMBLY OF COMPLEX C SUBUNIT B CCB1, chloroplastic OS=Arabidopsis thaliana OX=3702 GN=CCB1 PE=1 SV=1	0	3.299	4	1	1	1	1	267	30.1	9.77	3	1	0
High	Master Protein	Q9FNH6	NDR1/HIN1-like protein 3 OS=Arabidopsis thaliana OX=3702 GN=NHL3 PE=1 SV=1	0	3.286	5	1	1	1	1	231	25.9	9.2	3.25	1	0
High	Master Protein	Q9M0X9	4-coumarate--CoA ligase-like 7 OS=Arabidopsis thaliana OX=3702 GN=4CLL7 PE=1 SV=1	0	3.27	2	1	1	1	1	544	59.8	8.46	3.11	1	0
High	Master Protein	Q9ZVS5	Eukaryotic aspartyl protease family protein OS=Arabidopsis thaliana OX=3702 GN=At1g03230 PE=2 SV=1	0	3.238	3	1	1	1	1	434	46.1	9.14	3.46	1	0
High	Master Protein Candidate	Q9ZVS4	Eukaryotic aspartyl protease family protein OS=Arabidopsis thaliana OX=3702 GN=F15K9.17 PE=2 SV=1	0	3.238	3	1	1	1	1	433	45.7	8.66	3.46	1	0
High	Master Protein	Q9M9W1	60S ribosomal protein L22-2 OS=Arabidopsis thaliana OX=3702 GN=RPL22B PE=2 SV=1	0	3.234	10	1	1	1	1	124	14	9.55	3.14	1	0
High	None	F4IMI7	Ribosomal protein S4 (RPS4A) family protein OS=Arabidopsis thaliana OX=3702 GN=At2g17360 PE=4 SV=1	0	3.231	11	2	2	2	1	184	21.4	9.96	3.94	2	0
High	Master Protein	Q9FLQ4	Dihydrolipoyllysine-residue succinyltransferase component of 2-oxoglutarate dehydrogenase complex 1, mitochondrial OS=Arabidopsis thaliana OX=3702 GN=At5g55070 PE=1 SV=1	0	3.228	5	2	2	1	1	464	50.1	9.14	3.87	2	0
High	Master Protein Candidate	Q9M158	Rhodanese-like domain-containing protein 4, chloroplastic OS=Arabidopsis thaliana OX=3702 GN=STR4 PE=1 SV=2	0	3.185	3	1	1	1	1	466	49.4	5.3	3.04	1	0
High	Master Protein	A0A1P8B8J7	Thylakoid rhodanese-like protein OS=Arabidopsis thaliana OX=3702 GN=TROL PE=4 SV=1	0	3.185	3	1	1	1	1	507	54.4	5.16	3.04	1	0
High	Master Protein Candidate	Q93YW5	Probable protein phosphatase 2C 58 OS=Arabidopsis thaliana OX=3702 GN=At4g28400 PE=2 SV=1	0	3.176	4	1	1	1	1	283	31	7.97	3.65	1	0
High	Master Protein Candidate	A0A1P8B3K8	Protein phosphatase 2C family protein OS=Arabidopsis thaliana OX=3702 GN=At4g28400 PE=4 SV=1	0	3.176	5	1	1	1	1	261	28.8	7.44	3.65	1	0
High	Master Protein	Q9SIU8	Probable protein phosphatase 2C 20 OS=Arabidopsis thaliana OX=3702 GN=PPC3-1.2 PE=1 SV=3	0	3.176	4	1	1	1	1	290	31.8	6.3	3.65	1	0
High	Master Protein Candidate	A0A1P8B3J3	Protein phosphatase 2C family protein OS=Arabidopsis thaliana OX=3702 GN=At4g28400 PE=4 SV=1	0	3.176	5	1	1	1	1	253	27.8	8.05	3.65	1	0
High	Master Protein	O22788	Probable peroxygenase 3 OS=Arabidopsis thaliana OX=3702 GN=PXG3 PE=1 SV=1	0	3.173	5	1	1	1	1	236	26.6	5.34	0	1	0
High	Master Protein Candidate	A0A1P8AS81	Vesicle-associated membrane protein 721 OS=Arabidopsis thaliana OX=3702 GN=VAMP721 PE=4 SV=1	0	3.151	12	1	2	1	1	141	16.1	9.33	2.91	1	0
High	Master Protein Candidate	P47192	Vesicle-associated membrane protein 722 OS=Arabidopsis thaliana OX=3702 GN=VAMP722 PE=2 SV=2	0	3.151	8	1	2	1	1	221	24.9	8.9	2.91	1	0
High	Master Protein Candidate	Q9ZTW3	Vesicle-associated membrane protein 721 OS=Arabidopsis thaliana OX=3702 GN=VAMP721 PE=2 SV=1	0	3.151	8	1	2	1	1	219	24.7	8.75	2.91	1	0
High	Master Protein	B9DH97	AT2G33120 protein OS=Arabidopsis thaliana OX=3702 GN=SAR1 PE=2 SV=1	0	3.151	7	1	2	1	1	229	25.8	8.78	2.91	1	0
High	Master Protein	Q0WW26	Coatomer subunit gamma OS=Arabidopsis thaliana OX=3702 GN=At4g34450 PE=1 SV=2	0	3.139	1	1	1	1	1	886	98.4	5.16	2.85	1	0
High	Master Protein	O65355	Gamma-glutamyl hydrolase 2 OS=Arabidopsis thaliana OX=3702 GN=GGH2 PE=1 SV=2	0	3.13	5	1	1	1	1	347	38.6	7.14	3.66	1	0
High	Master Protein Candidate	F4IBT7	Folate gamma-glutamyl hydrolase OS=Arabidopsis thaliana OX=3702 GN=GGH2 PE=4 SV=1	0	3.13	5	1	1	1	1	333	36.9	7.14	3.66	1	0
High	Master Protein	F4JRY2	Proteasome subunit beta OS=Arabidopsis thaliana OX=3702 GN=PBA1 PE=3 SV=1	0	3.129	7	1	1	1	1	234	25.3	5.55	3.04	1	0
High	Master Protein Candidate	Q8LD27	Proteasome subunit beta type-6 OS=Arabidopsis thaliana OX=3702 GN=PBA1 PE=1 SV=2	0	3.129	7	1	1	1	1	233	25.1	5.55	3.04	1	0
High	Master Protein Candidate	O64767	AICARFT/IMPCHase bienzyme family protein OS=Arabidopsis thaliana OX=3702 GN=At2g35040 PE=3 SV=1	0	3.118	3	1	1	1	1	545	59.4	6.3	4.2	1	0
High	Master Protein	Q8RWT5	AICARFT/IMPCHase bienzyme family protein OS=Arabidopsis thaliana OX=3702 GN=At2g35040 PE=1 SV=1	0	3.118	3	1	1	1	1	596	64.9	6.92	4.2	1	0
High	Master Protein	Q9ZWC4	At1g04040/F21M11_2 OS=Arabidopsis thaliana OX=3702 GN=F21M11.2 PE=2 SV=1	0	3.107	6	2	2	1	1	271	31.1	9.11	1.81	2	0
High	Master Protein Candidate	F4JHJ0	HSP20-like chaperones superfamily protein OS=Arabidopsis thaliana OX=3702 GN=At4g02450 PE=1 SV=1	0	3.099	5	1	2	1	1	240	25.3	4.56	2.69	1	0
High	Master Protein	Q8L7U4	Co-chaperone protein p23-1 OS=Arabidopsis thaliana OX=3702 GN=P23-1 PE=1 SV=1	0	3.099	5	1	2	1	1	241	25.5	4.54	2.69	1	0
High	None	P42762	Chaperone protein ClpD, chloroplastic OS=Arabidopsis thaliana OX=3702 GN=CLPD PE=1 SV=1	0	3.078	1	1	1	1	1	945	103.2	6.23	3.2	1	0
High	Master Protein	Q93VC7	30S ribosomal protein S1, chloroplastic OS=Arabidopsis thaliana OX=3702 GN=RPS1 PE=1 SV=1	0	3.078	3	1	1	1	1	416	45.1	5.25	3.23	1	0
High	Master Protein Candidate	B3H621	Peptidase M1 family protein OS=Arabidopsis thaliana OX=3702 GN=At1g63770 PE=4 SV=1	0	3.075	2	1	1	1	1	945	106	6.55	2.52	1	0
High	Master Protein Candidate	F4I3R4	Peptidase M1 family protein OS=Arabidopsis thaliana OX=3702 GN=At1g63770 PE=4 SV=1	0	3.075	2	1	1	1	1	918	103.4	6.52	2.52	1	0
High	Master Protein	F4I3R0	Peptidase M1 family protein OS=Arabidopsis thaliana OX=3702 GN=At1g63770 PE=4 SV=1	0	3.075	2	1	1	1	1	987	110.7	6.48	2.52	1	0
High	Master Protein Candidate	Q8H0S9	Puromycin-sensitive aminopeptidase OS=Arabidopsis thaliana OX=3702 GN=MPA1 PE=2 SV=1	0	3.075	2	1	1	1	1	883	99.1	5.67	2.52	1	0
High	Master Protein Candidate	F4I3R1	Peptidase M1 family protein OS=Arabidopsis thaliana OX=3702 GN=At1g63770 PE=4 SV=2	0	3.075	2	1	1	1	1	975	109.3	6.48	2.52	1	0
High	None	Q8GWA5	Actin family protein OS=Arabidopsis thaliana OX=3702 GN=At2g42170 PE=2 SV=1	0	3.061	5	1	1	1	1	329	37.1	5.03	2.25	1	0
High	None	A0A1P8AY15	Actin family protein OS=Arabidopsis thaliana OX=3702 GN=At2g42170 PE=3 SV=1	0	3.061	6	1	1	1	1	319	35.8	5.06	2.25	1	0
High	Master Protein Candidate	P36397	ADP-ribosylation factor 1 OS=Arabidopsis thaliana OX=3702 GN=ARF1 PE=1 SV=2	0	3.054	6	1	1	1	1	181	20.6	6.95	2.92	1	0
High	Master Protein Candidate	Q9M1P5	ADP-ribosylation factor A1E OS=Arabidopsis thaliana OX=3702 GN=T17J13.250 PE=2 SV=1	0	3.054	6	1	1	1	1	181	20.6	6.95	2.92	1	0
High	Master Protein Candidate	Q6ID97	ADP-ribosylation factor A1F OS=Arabidopsis thaliana OX=3702 GN=ARFA1F PE=2 SV=1	0	3.054	6	1	1	1	1	181	20.6	6.95	2.92	1	0
High	Master Protein Candidate	A0A1P8BDK6	ADP-ribosylation factor A1B OS=Arabidopsis thaliana OX=3702 GN=ARFA1B PE=3 SV=1	0	3.054	6	1	1	1	1	181	20.7	6.95	2.92	1	0
High	Master Protein	Q9LYJ3	ADP-ribosylation factor A1B OS=Arabidopsis thaliana OX=3702 GN=ADP-ribosylation factor A1B PE=3 SV=1	0	3.054	6	1	1	1	1	188	21.5	6.95	2.92	1	0
High	Master Protein Candidate	Q9LQC8	ADP-ribosylation factor 2-A OS=Arabidopsis thaliana OX=3702 GN=ARF2-A PE=2 SV=2	0	3.054	6	1	1	1	1	181	20.6	6.95	2.92	1	0
High	None	A0A1P8BHG5	2-phosphoglycolate phosphatase 2 OS=Arabidopsis thaliana OX=3702 GN=PGLP2 PE=4 SV=1	0	3.044	5	1	1	1	1	224	24.6	6.04	3.07	1	0
High	None	Q8GWU0	Phosphoglycolate phosphatase 2 OS=Arabidopsis thaliana OX=3702 GN=PGLP2 PE=1 SV=1	0	3.044	4	1	1	1	1	301	33	5.2	3.07	1	0
High	Master Protein	Q9LR64	Photosystem II repair protein PSB27-H1, chloroplastic OS=Arabidopsis thaliana OX=3702 GN=PSB27-1 PE=1 SV=1	0	3.033	7	1	1	1	1	174	18.8	9.88	3.01	1	0
High	Master Protein	Q9SAC6	Alpha-glucan water dikinase 1, chloroplastic OS=Arabidopsis thaliana OX=3702 GN=GWD1 PE=1 SV=2	0	3.021	1	1	1	1	1	1399	156.5	5.92	2.99	1	0
High	Master Protein	Q42589	Non-specific lipid-transfer protein 1 OS=Arabidopsis thaliana OX=3702 GN=LTP1 PE=2 SV=1	0	3.018	8	1	1	1	1	118	11.7	8.95	2.43	1	0
High	None	A0A1P8BC98	UDP-glucose pyrophosphorylase 2 OS=Arabidopsis thaliana OX=3702 GN=UGP2 PE=4 SV=1	0	3	3	1	1	1	1	385	42.9	6.46	0	1	0
High	None	P57751	UTP--glucose-1-phosphate uridylyltransferase 1 OS=Arabidopsis thaliana OX=3702 GN=UGP1 PE=2 SV=1	0	3	3	1	1	1	1	470	51.9	6.01	0	1	0
High	None	A0A1P8BC93	UDP-glucose pyrophosphorylase 2 OS=Arabidopsis thaliana OX=3702 GN=UGP2 PE=4 SV=1	0	3	4	1	1	1	1	336	37.2	7.05	0	1	0
High	None	F4KGY8	UDP-glucose pyrophosphorylase 2 OS=Arabidopsis thaliana OX=3702 GN=UGP2 PE=4 SV=1	0	3	3	1	1	1	1	390	43.7	7.84	0	1	0
High	Master Protein	Q9SMX3	Mitochondrial outer membrane protein porin 3 OS=Arabidopsis thaliana OX=3702 GN=VDAC3 PE=1 SV=3	0	2.992	7	1	1	1	1	274	29.2	8.21	0	1	0
High	None	O24466	Ras-related protein RABE1a OS=Arabidopsis thaliana OX=3702 GN=RABE1A PE=1 SV=1	0	2.98	5	1	1	1	1	216	23.9	8.22	2.83	1	0
High	None	P28188	Ras-related protein RABD2a OS=Arabidopsis thaliana OX=3702 GN=RABD2A PE=1 SV=3	0	2.98	5	1	1	1	1	203	22.6	5.16	2.83	1	0
High	None	P28186	Ras-related protein RABE1c OS=Arabidopsis thaliana OX=3702 GN=RABE1C PE=1 SV=1	0	2.98	5	1	1	1	1	216	23.8	7.83	2.83	1	0
High	None	Q9SF91	Ras-related protein RABE1e OS=Arabidopsis thaliana OX=3702 GN=RABE1E PE=1 SV=1	0	2.98	5	1	1	1	1	218	24.3	8.21	2.83	1	0
High	None	A0A1I9LP95	RAB GTPase homolog C2B OS=Arabidopsis thaliana OX=3702 GN=RABC2b PE=4 SV=1	0	2.98	6	1	1	1	1	195	21.9	7.77	2.83	1	0
High	None	Q9SF92	Ras-related protein RABC2b OS=Arabidopsis thaliana OX=3702 GN=RABC2B PE=2 SV=1	0	2.98	5	1	1	1	1	205	22.9	8.22	2.83	1	0
High	None	Q9LZD4	Ras-related protein RABE1d OS=Arabidopsis thaliana OX=3702 GN=RABE1D PE=1 SV=1	0	2.98	5	1	1	1	1	216	24	7.81	2.83	1	0
High	None	Q948K6	Ras-related protein RABG1 OS=Arabidopsis thaliana OX=3702 GN=RABG1 PE=2 SV=1	0	2.98	5	1	1	1	1	204	23.5	7.96	2.83	1	0
High	None	Q9FJF1	Putative GTP-binding protein ara-3 OS=Arabidopsis thaliana OX=3702 GN=MMN10.12 PE=2 SV=1	0	2.98	5	1	1	1	1	216	23.8	8.22	2.83	1	0
High	None	O49841	Ras-related protein RABC2a OS=Arabidopsis thaliana OX=3702 GN=RABC2A PE=1 SV=1	0	2.98	5	1	1	1	1	210	23.3	6.23	2.83	1	0
High	Master Protein Candidate	Q9LZH9	60S ribosomal protein L7a-2 OS=Arabidopsis thaliana OX=3702 GN=RPL7AB PE=2 SV=1	0	2.979	4	1	1	1	1	256	29	10.15	2.83	1	0
High	Master Protein	P49692	60S ribosomal protein L7a-1 OS=Arabidopsis thaliana OX=3702 GN=RPL7AA PE=2 SV=2	0	2.979	4	1	1	1	1	257	29.1	10.13	2.83	1	0
High	Master Protein Candidate	Q94JY0	Protein IN CHLOROPLAST ATPASE BIOGENESIS, chloroplastic OS=Arabidopsis thaliana OX=3702 GN=PAB PE=1 SV=1	0	2.945	3	1	1	1	1	330	36.9	6	2.21	1	0
High	Master Protein Candidate	Q3E7I4	Cyclin delta-3 OS=Arabidopsis thaliana OX=3702 GN=At4g34090 PE=4 SV=3	0	2.945	4	1	1	1	1	235	26.3	7.66	2.21	1	0
High	Master Protein	Q9S7B5	Threonine synthase 1, chloroplastic OS=Arabidopsis thaliana OX=3702 GN=TS1 PE=1 SV=1	0	2.945	2	1	1	1	1	526	57.7	7.42	0	1	0
High	Master Protein	F4JJY7	Cyclin delta-3 OS=Arabidopsis thaliana OX=3702 GN=At4g34090 PE=4 SV=1	0	2.945	3	1	1	1	1	390	43.9	5.9	2.21	1	0
High	Master Protein	O49203	Nucleoside diphosphate kinase III, chloroplastic/mitochondrial OS=Arabidopsis thaliana OX=3702 GN=NDPK3 PE=1 SV=1	0	2.94	10	2	2	2	1	238	25.7	9.23	0	2	0
High	None	Q9M8X9	40S ribosomal protein S16-2 OS=Arabidopsis thaliana OX=3702 GN=RPS16B PE=1 SV=1	0	2.929	7	1	1	1	1	146	16.6	10.18	2.94	1	0
High	Master Protein	Q9ZUC1	NADPH-dependent alkenal/one oxidoreductase, chloroplastic OS=Arabidopsis thaliana OX=3702 GN=AOR PE=1 SV=2	0	2.916	3	1	1	1	1	386	41	8.35	2.88	1	0
High	None	Q9LDV4	Alanine aminotransferase 2, mitochondrial OS=Arabidopsis thaliana OX=3702 GN=ALAAT2 PE=1 SV=1	0	2.862	4	1	1	1	1	540	59.5	6.38	2.68	1	0
High	Master Protein	Q9SL05	Protein PROTON GRADIENT REGULATION 5, chloroplastic OS=Arabidopsis thaliana OX=3702 GN=PGR5 PE=1 SV=1	0	2.849	8	1	1	1	1	133	14.3	10.65	3.17	1	0
High	None	P0CJ46	Actin-1 OS=Arabidopsis thaliana OX=3702 GN=ACT1 PE=1 SV=1	0	2.844	3	1	1	0	2	377	41.8	5.49	3.34	1	0
High	None	Q8RYC2	Putative actin-5 OS=Arabidopsis thaliana OX=3702 GN=ACT5 PE=5 SV=1	0	2.844	3	1	1	0	2	378	42.1	5.33	3.34	1	0
High	Master Protein Candidate	Q9SI20	Elongation factor 1-delta 2 OS=Arabidopsis thaliana OX=3702 GN=At2g18110 PE=1 SV=1	0	2.843	4	1	1	1	1	231	25.3	4.6	3.3	1	0
High	Master Protein	A8MRC4	Translation elongation factor EF1B/ribosomal protein S6 family protein OS=Arabidopsis thaliana OX=3702 GN=eEF-1Bb1 PE=1 SV=1	0	2.843	3	1	1	1	1	260	28.8	4.74	3.3	1	0
High	Master Protein Candidate	P48006	Elongation factor 1-delta 1 OS=Arabidopsis thaliana OX=3702 GN=At1g30230 PE=1 SV=2	0	2.843	4	1	1	1	1	231	25.1	4.56	3.3	1	0
High	Master Protein	Q8LDU4	Red chlorophyll catabolite reductase, chloroplastic OS=Arabidopsis thaliana OX=3702 GN=RCCR PE=1 SV=2	0	2.842	4	1	1	1	1	319	36.4	6.04	3.17	1	0
High	Master Protein	Q8L7C9	Glutathione S-transferase U20 OS=Arabidopsis thaliana OX=3702 GN=GSTU20 PE=1 SV=1	0	2.841	4	1	1	1	1	217	25	5.78	1.94	1	0
High	Master Protein	Q06738	Low-temperature-induced 78 kDa protein OS=Arabidopsis thaliana OX=3702 GN=RD29A PE=1 SV=2	0	2.827	3	1	1	1	1	710	77.8	4.54	0	1	0
High	Master Protein	P42799	Glutamate-1-semialdehyde 2,1-aminomutase 1, chloroplastic OS=Arabidopsis thaliana OX=3702 GN=GSA1 PE=1 SV=1	0	2.819	3	1	1	1	1	474	50.3	6.87	2.25	1	0
High	Master Protein Candidate	Q42522	Glutamate-1-semialdehyde 2,1-aminomutase 2, chloroplastic OS=Arabidopsis thaliana OX=3702 GN=GSA2 PE=1 SV=2	0	2.819	3	1	1	1	1	472	50.1	7.39	2.25	1	0
High	Master Protein	Q8H107	Dihydrolipoyllysine-residue succinyltransferase component of 2-oxoglutarate dehydrogenase complex 2, mitochondrial OS=Arabidopsis thaliana OX=3702 GN=At4g26910 PE=1 SV=2	0	2.817	5	2	2	1	1	464	50	9.09	4.22	2	1
High	Master Protein	Q8GYI4	Phosphoenolpyruvate carboxylase family protein OS=Arabidopsis thaliana OX=3702 GN=At2g43180 PE=2 SV=1	0	2.814	3	1	1	1	1	479	52	5.3	2.93	1	0
High	Master Protein Candidate	F4IQ76	Phosphoenolpyruvate carboxylase family protein OS=Arabidopsis thaliana OX=3702 GN=At2g43180 PE=4 SV=1	0	2.814	3	1	1	1	1	466	51	6.4	2.93	1	0
High	Master Protein Candidate	F4IQ73	Phosphoenolpyruvate carboxylase family protein OS=Arabidopsis thaliana OX=3702 GN=At2g43180 PE=4 SV=1	0	2.814	3	1	1	1	1	478	51.8	5.36	2.93	1	0
High	Master Protein Candidate	F4IQ75	Phosphoenolpyruvate carboxylase family protein OS=Arabidopsis thaliana OX=3702 GN=At2g43180 PE=4 SV=1	0	2.814	3	1	1	1	1	451	49	5.8	2.93	1	0
High	None	Q9SHH6	Glutathione S-transferase U24 OS=Arabidopsis thaliana OX=3702 GN=GSTU24 PE=2 SV=1	0	2.781	4	1	1	1	1	218	25.3	6.16	2.7	1	0
High	Master Protein	Q9ZRA2	Homogentisate 1,2-dioxygenase OS=Arabidopsis thaliana OX=3702 GN=HGO PE=2 SV=2	0	2.78	3	1	1	1	1	461	51.4	6.18	0	1	0
High	Master Protein	Q9SI75	Elongation factor G, chloroplastic OS=Arabidopsis thaliana OX=3702 GN=CPEFG PE=1 SV=1	0	2.772	2	1	1	1	1	783	86	5.6	3.78	1	0
High	None	F4INE2	Ribulose bisphosphate carboxylase large chain, catalytic domain-containing protein OS=Arabidopsis thaliana OX=3702 GN=At2g07732 PE=4 SV=1	0	2.714	10	1	1	1	1	116	13.1	8.47	3.42	1	0
High	Master Protein Candidate	O04204	60S acidic ribosomal protein P0-1 OS=Arabidopsis thaliana OX=3702 GN=RPP0A PE=1 SV=1	0	2.714	4	1	1	1	1	317	33.6	5.29	3.12	1	0
High	Master Protein	P57691	60S acidic ribosomal protein P0-3 OS=Arabidopsis thaliana OX=3702 GN=RPP0C PE=1 SV=1	0	2.714	4	1	1	1	1	323	34.4	5.15	3.12	1	0
High	Master Protein Candidate	A8MQR4	60S acidic ribosomal protein P0 OS=Arabidopsis thaliana OX=3702 GN=At3g09200 PE=1 SV=1	0	2.714	5	1	1	1	1	287	30.6	4.84	3.12	1	0
High	Master Protein Candidate	Q42112	60S acidic ribosomal protein P0-2 OS=Arabidopsis thaliana OX=3702 GN=RPP0B PE=1 SV=2	0	2.714	4	1	1	1	1	320	34.1	5.07	3.12	1	0
High	Master Protein	O64903	Nucleoside diphosphate kinase II, chloroplastic OS=Arabidopsis thaliana OX=3702 GN=NDPK2 PE=1 SV=2	0	2.702	5	1	1	1	1	231	25.5	8.95	2.94	1	0
High	Master Protein	Q9SA73	Obg-like ATPase 1 OS=Arabidopsis thaliana OX=3702 GN=YchF1 PE=1 SV=1	0	2.688	4	1	1	1	1	394	44.4	6.81	0	1	0
High	Master Protein Candidate	Q9FWA3	6-phosphogluconate dehydrogenase, decarboxylating 2 OS=Arabidopsis thaliana OX=3702 GN=PGD2 PE=1 SV=1	0	2.687	2	1	1	1	1	486	53.5	7.42	3.32	1	0
High	Master Protein Candidate	Q9SH69	6-phosphogluconate dehydrogenase, decarboxylating 1, chloroplastic OS=Arabidopsis thaliana OX=3702 GN=PGD1 PE=1 SV=1	0	2.687	2	1	1	1	1	487	53.3	5.45	3.32	1	0
High	Master Protein	Q9FFR3	6-phosphogluconate dehydrogenase, decarboxylating 3, chloroplastic OS=Arabidopsis thaliana OX=3702 GN=PGD3 PE=1 SV=1	0	2.687	2	1	1	1	1	487	53.3	5.8	3.32	1	0
High	Master Protein Candidate	F4HUS8	Calcium-transporting ATPase OS=Arabidopsis thaliana OX=3702 GN=ACA1 PE=3 SV=1	0	2.68	1	1	1	1	1	946	103.7	5.86	3.06	1	0
High	Master Protein Candidate	A0A1P8AR51	Calcium-transporting ATPase OS=Arabidopsis thaliana OX=3702 GN=ACA1 PE=3 SV=1	0	2.68	1	1	1	1	1	957	103.8	5.35	3.06	1	0
High	Master Protein	Q37145	Calcium-transporting ATPase 1 OS=Arabidopsis thaliana OX=3702 GN=ACA1 PE=1 SV=3	0	2.68	1	1	1	1	1	1020	111.2	5.68	3.06	1	0
High	Master Protein	P29402	Calnexin homolog 1 OS=Arabidopsis thaliana OX=3702 GN=CNX1 PE=1 SV=1	0	2.675	3	1	1	1	1	530	60.4	4.91	2.53	1	0
High	Master Protein	O49675	Probable carotenoid cleavage dioxygenase 4, chloroplastic OS=Arabidopsis thaliana OX=3702 GN=CCD4 PE=1 SV=1	0	2.641	2	1	1	1	1	595	65.6	6.92	3.37	1	0
High	Master Protein	Q6XJG8	26S proteasome non-ATPase regulatory subunit 2 homolog B OS=Arabidopsis thaliana OX=3702 GN=RPN1B PE=1 SV=1	0	2.64	2	1	1	1	1	891	97.9	5.21	3.19	1	0
High	Master Protein Candidate	Q9SIV2	26S proteasome non-ATPase regulatory subunit 2 homolog A OS=Arabidopsis thaliana OX=3702 GN=RPN1A PE=1 SV=2	0	2.64	2	1	1	1	1	891	98.1	5.1	3.19	1	0
High	Master Protein	Q9MAP3	50S ribosomal protein L11, chloroplastic OS=Arabidopsis thaliana OX=3702 GN=RPL11 PE=2 SV=1	0	2.622	5	1	1	1	1	222	23.1	9.66	3.04	1	0
High	None	Q9C9Z8	V-type proton ATPase subunit E2 OS=Arabidopsis thaliana OX=3702 GN=VHA-E2 PE=2 SV=1	0	2.608	4	1	1	1	1	235	26.8	9.13	2.74	1	0
High	Master Protein	O04630	Threonine--tRNA ligase, mitochondrial 1 OS=Arabidopsis thaliana OX=3702 GN=THRRS PE=1 SV=3	0	2.598	1	1	1	1	1	709	80.9	6.98	2.19	1	0
High	Master Protein	Q94K71	CBBY-like protein OS=Arabidopsis thaliana OX=3702 GN=CBBY PE=1 SV=1	0	2.59	3	1	1	1	1	319	34.2	8.06	2.43	1	0
High	None	B9DGP8	AT5G13450 protein OS=Arabidopsis thaliana OX=3702 GN=ATP5 PE=1 SV=1	0	2.587	6	1	1	1	1	190	21.1	9.7	3.17	1	0
High	Master Protein	Q9LHH7	Bifunctional protein FolD 2 OS=Arabidopsis thaliana OX=3702 GN=FOLD2 PE=2 SV=1	0	2.573	5	1	1	1	1	299	31.6	8.16	3.2	1	0
High	Master Protein Candidate	Q9SF35	40S ribosomal protein S23-1 OS=Arabidopsis thaliana OX=3702 GN=RPS23A PE=2 SV=2	0	2.572	8	1	1	1	1	142	15.8	10.29	3.61	1	0
High	Master Protein	P49201	40S ribosomal protein S23-2 OS=Arabidopsis thaliana OX=3702 GN=RPS23B PE=2 SV=2	0	2.572	8	1	1	1	1	142	15.7	10.37	3.61	1	0
High	None	P46011	Bifunctional nitrilase/nitrile hydratase NIT4 OS=Arabidopsis thaliana OX=3702 GN=NIT4 PE=1 SV=1	0	2.571	3	1	1	0	2	355	38.9	5.72	3.26	1	0
High	None	A0A1P8BBX1	Nitrilase 4 OS=Arabidopsis thaliana OX=3702 GN=NIT4 PE=4 SV=1	0	2.571	4	1	1	0	2	262	29	6.87	3.26	1	0
High	Master Protein	Q9FK60	Superoxide dismutase [Cu-Zn] 3 OS=Arabidopsis thaliana OX=3702 GN=CSD3 PE=1 SV=1	0	2.522	8	1	1	1	1	164	16.9	7.64	0	1	0
High	Master Protein Candidate	P24704	Superoxide dismutase [Cu-Zn] 1 OS=Arabidopsis thaliana OX=3702 GN=CSD1 PE=1 SV=2	0	2.522	9	1	1	1	1	152	15.1	5.6	0	1	0
High	Master Protein	Q9LXV3	Dicarboxylate transporter 1, chloroplastic OS=Arabidopsis thaliana OX=3702 GN=DIT1 PE=1 SV=1	0	2.51	2	1	1	1	1	557	59.2	9.73	2.53	1	0
High	Master Protein Candidate	B3H4S6	Dicarboxylate transporter 1 OS=Arabidopsis thaliana OX=3702 GN=DiT1 PE=4 SV=1	0	2.51	2	1	1	1	1	556	59	9.73	2.53	1	0
High	Master Protein	Q9LDZ0	Heat shock 70 kDa protein 10, mitochondrial OS=Arabidopsis thaliana OX=3702 GN=HSP70-10 PE=1 SV=1	0	2.508	2	1	1	1	1	682	72.9	5.78	2.78	1	0
High	None	A8MRH4	AT2G01250 protein OS=Arabidopsis thaliana OX=3702 GN=At2g01250 PE=1 SV=1	0	2.488	11	3	3	3	1	184	21.5	10.1	1.71	3	0
High	Master Protein	P42798	40S ribosomal protein S15a-1 OS=Arabidopsis thaliana OX=3702 GN=RPS15AA PE=2 SV=2	0	2.465	7	1	1	1	1	130	14.8	9.89	2.4	1	0
High	Master Protein	Q9LXG1	40S ribosomal protein S9-1 OS=Arabidopsis thaliana OX=3702 GN=RPS9B PE=1 SV=1	0	2.451	5	1	1	1	1	198	23	10.17	2.72	1	0
High	Master Protein Candidate	Q9FLF0	40S ribosomal protein S9-2 OS=Arabidopsis thaliana OX=3702 GN=RPS9C PE=1 SV=1	0	2.451	5	1	1	1	1	197	23.1	10.35	2.72	1	0
High	Master Protein Candidate	B3H7J6	Ribosomal protein S4 OS=Arabidopsis thaliana OX=3702 GN=At5g15200 PE=1 SV=1	0	2.451	6	1	1	1	1	156	18.8	9.8	2.72	1	0
High	Master Protein	Q9C514	40S ribosomal protein S7-1 OS=Arabidopsis thaliana OX=3702 GN=RPS7A PE=2 SV=1	0	2.451	6	1	1	1	1	191	21.9	9.8	2.87	1	0
High	Master Protein	P34790	Peptidyl-prolyl cis-trans isomerase CYP18-3 OS=Arabidopsis thaliana OX=3702 GN=CYP18-3 PE=1 SV=1	0	2.447	12	1	1	1	1	172	18.4	7.81	0	1	0
High	Master Protein	O04496	Aspartyl protease AED3 OS=Arabidopsis thaliana OX=3702 GN=AED3 PE=1 SV=1	0	2.441	2	1	1	1	1	449	47.6	7.52	2.42	1	0
High	Master Protein Candidate	Q9FJX3	Mitochondrial outer membrane protein porin 2 OS=Arabidopsis thaliana OX=3702 GN=VDAC2 PE=1 SV=1	0	2.435	4	1	1	1	1	276	29.6	8.85	2.06	1	0
High	Master Protein Candidate	F4K3R8	Voltage dependent anion channel 2 OS=Arabidopsis thaliana OX=3702 GN=VDAC2 PE=1 SV=1	0	2.435	4	1	1	1	1	303	32.9	7.58	2.06	1	0
High	Master Protein	A0A2H1ZE94	Voltage dependent anion channel 2 OS=Arabidopsis thaliana OX=3702 GN=VDAC2 PE=1 SV=1	0	2.435	4	1	1	1	1	305	33.1	8.9	2.06	1	0
High	None	A0A2H1ZEN5	PGR5-LIKE A OS=Arabidopsis thaliana OX=3702 GN=PGR5-LIKE A PE=1 SV=1	0	2.414	5	1	1	1	1	302	33.5	5.59	2.55	1	0
High	Master Protein	O64644	Histone deacetylase complex subunit SAP18 OS=Arabidopsis thaliana OX=3702 GN=At2g45640 PE=1 SV=1	0	2.41	11	1	1	1	1	152	17.2	9.17	0	1	0
High	Master Protein Candidate	F4IG85	SIN3 associated polypeptide P18 OS=Arabidopsis thaliana OX=3702 GN=SAP18 PE=4 SV=1	0	2.41	11	1	1	1	1	149	16.8	9.17	0	1	0
High	None	Q9LUE6	Probable UDP-arabinopyranose mutase 4 OS=Arabidopsis thaliana OX=3702 GN=RGP4 PE=1 SV=1	0	2.405	2	1	1	1	1	364	41.8	7.03	2.36	1	0
High	None	O22666	UDP-arabinopyranose mutase 3 OS=Arabidopsis thaliana OX=3702 GN=RGP3 PE=1 SV=2	0	2.405	2	1	1	1	1	362	41.3	5.6	2.36	1	0
High	None	F4J912	Ribosomal protein L5 OS=Arabidopsis thaliana OX=3702 GN=ATL5 PE=1 SV=1	0	2.392	5	1	1	1	1	190	21.5	5.86	2.66	1	0
High	None	P22738	60S ribosomal protein L3-2 OS=Arabidopsis thaliana OX=3702 GN=ARP2 PE=2 SV=4	0	2.389	2	1	1	1	1	390	44.5	10.11	2.41	1	0
High	Master Protein Candidate	Q8LAA6	Probable aquaporin PIP1-5 OS=Arabidopsis thaliana OX=3702 GN=PIP1-5 PE=1 SV=2	0	2.383	3	1	1	1	1	287	30.6	8.82	3.22	1	0
High	Master Protein Candidate	Q08733	Aquaporin PIP1-3 OS=Arabidopsis thaliana OX=3702 GN=PIP1-3 PE=1 SV=1	0	2.383	3	1	1	1	1	286	30.6	8.85	3.22	1	0
High	Master Protein Candidate	Q9SV31	Probable aquaporin PIP2-5 OS=Arabidopsis thaliana OX=3702 GN=PIP2-5 PE=1 SV=1	0	2.383	3	1	1	1	1	286	30.6	8.82	3.22	1	0
High	Master Protein	Q39196	Probable aquaporin PIP1-4 OS=Arabidopsis thaliana OX=3702 GN=PIP1.4 PE=1 SV=1	0	2.383	3	1	1	1	1	287	30.7	8.84	3.22	1	0
High	Master Protein Candidate	A8MSF6	Plasma membrane intrinsic protein 1C OS=Arabidopsis thaliana OX=3702 GN=PIP1C PE=3 SV=1	0	2.383	5	1	1	1	1	214	22.5	9.64	3.22	1	0
High	Master Protein Candidate	P61837	Aquaporin PIP1-1 OS=Arabidopsis thaliana OX=3702 GN=PIP1-1 PE=1 SV=1	0	2.383	3	1	1	1	1	286	30.7	9.01	3.22	1	0
High	Master Protein	Q9S757	Bifunctional L-3-cyanoalanine synthase/cysteine synthase C1, mitochondrial OS=Arabidopsis thaliana OX=3702 GN=CYSC1 PE=1 SV=1	0	2.382	5	2	2	2	1	368	39.9	8.54	2.47	2	0
High	Master Protein	Q93WJ8	Monodehydroascorbate reductase 2 OS=Arabidopsis thaliana OX=3702 GN=MDAR2 PE=1 SV=1	0	2.378	4	1	1	1	1	435	47.5	5.31	2.91	1	0
High	Master Protein	Q8LDV3	Uncharacterized protein At4g13200, chloroplastic OS=Arabidopsis thaliana OX=3702 GN=At4g13200 PE=1 SV=2	0	2.369	5	1	1	1	1	185	20.4	5.3	1.95	1	0
High	Master Protein	Q9M2U7	AT3g54400/T12E18_90 OS=Arabidopsis thaliana OX=3702 GN=T12E18_90 PE=2 SV=1	0	2.363	2	1	1	1	1	425	45.4	9.09	2.3	1	0
High	None	F4IT14	HARMLESS TO OZONE LAYER 1 OS=Arabidopsis thaliana OX=3702 GN=HOL1 PE=4 SV=1	0	2.361	9	1	1	1	1	163	18.5	4.78	0	1	0
High	Master Protein	O22149	Probable pectinesterase/pectinesterase inhibitor 17 OS=Arabidopsis thaliana OX=3702 GN=PME17 PE=2 SV=2	0	2.346	3	1	1	1	1	511	55.9	9.04	0	1	0
High	Master Protein	B9DG21	Aspartate aminotransferase OS=Arabidopsis thaliana OX=3702 GN=ASP5 PE=1 SV=1	0	2.344	2	1	1	1	1	462	50.9	7.53	2.26	1	0
High	Master Protein Candidate	P46645	Aspartate aminotransferase, cytoplasmic isozyme 1 OS=Arabidopsis thaliana OX=3702 GN=ASP2 PE=1 SV=2	0	2.344	2	1	1	1	1	405	44.2	7.28	2.26	1	0
High	Master Protein Candidate	F4JTH0	Aspartate aminotransferase OS=Arabidopsis thaliana OX=3702 GN=ASP5 PE=1 SV=1	0	2.344	2	1	1	1	1	448	49.3	7.87	2.26	1	0
High	Master Protein Candidate	P46644	Aspartate aminotransferase 3, chloroplastic OS=Arabidopsis thaliana OX=3702 GN=ASP3 PE=1 SV=1	0	2.344	2	1	1	1	1	449	48.9	9.29	2.26	1	0
High	Master Protein Candidate	P46248	Aspartate aminotransferase, chloroplastic OS=Arabidopsis thaliana OX=3702 GN=ASP5 PE=1 SV=2	0	2.344	2	1	1	1	1	453	49.8	8.15	2.26	1	0
High	Master Protein	Q94A94	Diaminopimelate decarboxylase 2, chloroplastic OS=Arabidopsis thaliana OX=3702 GN=LYSA2 PE=1 SV=1	0	2.317	3	1	1	1	1	489	54.1	6.67	0	1	0
High	Master Protein Candidate	Q949X7	Diaminopimelate decarboxylase 1, chloroplastic OS=Arabidopsis thaliana OX=3702 GN=LYSA1 PE=1 SV=1	0	2.317	3	1	1	1	1	484	53.5	6.98	0	1	0
High	None	Q43314	Glutamate dehydrogenase 1 OS=Arabidopsis thaliana OX=3702 GN=GDH1 PE=2 SV=1	0	2.317	2	1	1	1	1	411	44.5	6.86	3.48	1	0
High	Master Protein Candidate	Q9SUW2	Adenine phosphoribosyltransferase 3 OS=Arabidopsis thaliana OX=3702 GN=APT3 PE=1 SV=1	0	2.283	8	1	1	1	1	183	20.3	6.09	2.59	1	0
High	Master Protein Candidate	A0A1P8AN73	Adenine phosphoribosyl transferase 2 OS=Arabidopsis thaliana OX=3702 GN=APT2 PE=3 SV=1	0	2.283	9	1	1	1	1	160	17.5	5.38	2.59	1	0
High	Master Protein Candidate	A0A1P8B6N4	Adenine phosphoribosyl transferase 3 OS=Arabidopsis thaliana OX=3702 GN=APT3 PE=4 SV=1	0	2.283	14	1	1	1	1	105	11.8	9.61	2.59	1	0
High	Master Protein Candidate	P31166	Adenine phosphoribosyltransferase 1, chloroplastic OS=Arabidopsis thaliana OX=3702 GN=APT1 PE=1 SV=2	0	2.283	6	1	1	1	1	243	26.4	8.44	2.59	1	0
High	Master Protein	F4HSX1	Adenine phosphoribosyl transferase 1 OS=Arabidopsis thaliana OX=3702 GN=APT1 PE=1 SV=1	0	2.283	5	1	1	1	1	284	31	7.96	2.59	1	0
High	Master Protein Candidate	Q42563	Adenine phosphoribosyltransferase 2 OS=Arabidopsis thaliana OX=3702 GN=APT2 PE=1 SV=1	0	2.283	8	1	1	1	1	192	21	5.95	2.59	1	0
High	Master Protein	O24456	Receptor for activated C kinase 1A OS=Arabidopsis thaliana OX=3702 GN=RACK1A PE=1 SV=2	0	2.261	4	1	1	1	1	327	35.7	7.71	0	1	0
High	Master Protein	Q9SSS9	ATP synthase subunit delta, chloroplastic OS=Arabidopsis thaliana OX=3702 GN=ATPD PE=1 SV=1	0	2.224	5	1	1	1	1	234	25.7	9.06	3.2	1	0
High	None	A0A1P8ANX8	Vacuolar H+-ATPase subunit E isoform 3 OS=Arabidopsis thaliana OX=3702 GN=VHA-E3 PE=3 SV=1	0	2.199	4	1	1	1	1	237	27.2	6.02	2.42	1	0
High	None	A0A1P8ANV6	Vacuolar H+-ATPase subunit E isoform 3 OS=Arabidopsis thaliana OX=3702 GN=VHA-E3 PE=4 SV=1	0	2.199	5	1	1	1	1	192	22.4	5.66	2.42	1	0
High	None	P0CAN7	V-type proton ATPase subunit E3 OS=Arabidopsis thaliana OX=3702 GN=VHA-E3 PE=2 SV=1	0	2.199	4	1	1	1	1	237	27.1	6.19	2.42	1	0
High	None	P11139	Tubulin alpha-1 chain OS=Arabidopsis thaliana OX=3702 GN=TUBA1 PE=2 SV=1	0	2.189	3	1	1	1	1	450	49.8	5.05	0	1	0
High	Master Protein	A0A1P8B5G3	Cysteine-rich RECEPTOR-like kinase OS=Arabidopsis thaliana OX=3702 GN=CRK8 PE=4 SV=1	0	2.158	1	1	1	1	1	1043	116.8	7.56	2.52	1	0
High	Master Protein Candidate	O65468	Cysteine-rich receptor-like protein kinase 8 OS=Arabidopsis thaliana OX=3702 GN=CRK8 PE=3 SV=2	0	2.158	1	1	1	1	1	676	75.4	6.71	2.52	1	0
High	Master Protein Candidate	O65469	Putative cysteine-rich receptor-like protein kinase 9 OS=Arabidopsis thaliana OX=3702 GN=CRK9 PE=5 SV=1	0	2.158	3	1	1	1	1	265	29.7	6.92	2.52	1	0
High	Master Protein	O04616	Protein CURVATURE THYLAKOID 1A, chloroplastic OS=Arabidopsis thaliana OX=3702 GN=CURT1A PE=1 SV=1	0	2.157	6	1	1	1	1	164	17.7	9.17	2.43	1	0
High	Master Protein Candidate	Q9ZV19	DJ-1 protein homolog E OS=Arabidopsis thaliana OX=3702 GN=DJ1E PE=1 SV=1	0	2.148	3	1	1	1	1	398	42.7	5.22	0	1	0
High	Master Protein	Q9M1G8	DJ-1 protein homolog F OS=Arabidopsis thaliana OX=3702 GN=DJ1F PE=1 SV=1	0	2.148	3	1	1	1	1	399	43.1	5.86	0	1	0
High	Master Protein Candidate	B3H6C6	Class I glutamine amidotransferase-like superfamily protein OS=Arabidopsis thaliana OX=3702 GN=YLS5 PE=4 SV=1	0	2.148	4	1	1	1	1	279	30.1	4.77	0	1	0
High	Master Protein	Q9LZF5	Lectin-like protein OS=Arabidopsis thaliana OX=3702 GN=LLP PE=1 SV=1	0	2.147	4	1	1	1	1	274	30.1	9.38	2.97	1	0
High	Master Protein Candidate	Q9LHQ5	Probable histone H2A.2 OS=Arabidopsis thaliana OX=3702 GN=At3g20670 PE=1 SV=1	0	2.146	7	1	1	1	1	132	13.8	10.15	2.52	1	0
High	Master Protein Candidate	Q9S9K7	Probable histone H2AXb OS=Arabidopsis thaliana OX=3702 GN=At1g54690 PE=1 SV=1	0	2.146	6	1	1	1	1	142	14.8	10.32	2.52	1	0
High	Master Protein Candidate	Q9SII0	Probable histone H2A variant 2 OS=Arabidopsis thaliana OX=3702 GN=At2g38810 PE=2 SV=1	0	2.146	7	1	1	1	1	136	14.4	10.48	2.52	1	0
High	Master Protein Candidate	O81826	Probable histone H2A.3 OS=Arabidopsis thaliana OX=3702 GN=At4g27230 PE=1 SV=1	0	2.146	7	1	1	1	1	131	13.8	10.05	2.52	1	0
High	Master Protein Candidate	O04848	Probable histone H2AXa OS=Arabidopsis thaliana OX=3702 GN=At1g08880 PE=1 SV=1	0	2.146	6	1	1	1	1	142	14.8	10.32	2.52	1	0
High	Master Protein Candidate	Q9C944	Probable histone H2A variant 3 OS=Arabidopsis thaliana OX=3702 GN=At1g52740 PE=1 SV=1	0	2.146	7	1	1	1	1	134	14.3	10.29	2.52	1	0
High	Master Protein Candidate	Q9LD28	Histone H2A.6 OS=Arabidopsis thaliana OX=3702 GN=RAT5 PE=1 SV=1	0	2.146	7	1	1	1	1	130	13.6	10.15	2.52	1	0
High	Master Protein	Q94F49	Probable histone H2A.5 OS=Arabidopsis thaliana OX=3702 GN=At5g27670 PE=1 SV=1	0	2.146	6	1	1	1	1	150	15.9	10.46	2.52	1	0
High	Master Protein Candidate	O23628	Histone H2A variant 1 OS=Arabidopsis thaliana OX=3702 GN=H2AV PE=1 SV=1	0	2.146	7	1	1	1	1	136	14.5	10.32	2.52	1	0
High	Master Protein Candidate	Q9C681	Probable histone H2A.1 OS=Arabidopsis thaliana OX=3702 GN=At1g51060 PE=1 SV=1	0	2.146	7	1	1	1	1	132	13.9	10.1	2.52	1	0
High	Master Protein Candidate	Q9FJE8	Probable histone H2A.7 OS=Arabidopsis thaliana OX=3702 GN=At5g59870 PE=1 SV=1	0	2.146	6	1	1	1	1	150	16	10.55	2.52	1	0
High	Master Protein	Q9SYG7	Aldehyde dehydrogenase family 7 member B4 OS=Arabidopsis thaliana OX=3702 GN=ALDH7B4 PE=2 SV=3	0	2.144	2	1	1	1	1	508	54.2	5.54	2.27	1	0
High	Master Protein	Q9SLA8	Enoyl-[acyl-carrier-protein] reductase [NADH], chloroplastic OS=Arabidopsis thaliana OX=3702 GN=MOD1 PE=1 SV=1	0	2.133	3	1	1	1	1	390	41.2	9	2.72	1	0
High	Master Protein	O23016	Probable voltage-gated potassium channel subunit beta OS=Arabidopsis thaliana OX=3702 GN=KAB1 PE=1 SV=1	0	2.126	5	1	1	1	1	328	36.5	7.42	3.32	1	0
High	None	P27323	Heat shock protein 90-1 OS=Arabidopsis thaliana OX=3702 GN=HSP90-1 PE=1 SV=3	0	2.122	2	1	1	1	1	700	80.6	5.05	3.44	1	0
High	Master Protein	A0A1I9LMF2	Sieve element occlusion protein OS=Arabidopsis thaliana OX=3702 GN=SEOa PE=4 SV=1	0	2.093	3	1	1	1	1	846	96.8	6.7	0	1	0
High	Master Protein Candidate	Q93XX2	Protein SIEVE ELEMENT OCCLUSION A OS=Arabidopsis thaliana OX=3702 GN=SEOA PE=1 SV=1	0	2.093	3	1	1	1	1	822	94.2	6.76	0	1	0
High	None	A0A1P8BF22	Glutamine synthetase 14 OS=Arabidopsis thaliana OX=3702 GN=GLN1:4 PE=3 SV=1	0	2.078	6	1	1	1	1	249	27.2	4.84	0	1	0
High	None	Q9FMD9	Glutamine synthetase cytosolic isozyme 1-4 OS=Arabidopsis thaliana OX=3702 GN=GLN1-4 PE=1 SV=1	0	2.078	4	1	1	1	1	356	39	5.29	0	1	0
High	Master Protein	Q9LEW3	Aspartyl protease AED1 OS=Arabidopsis thaliana OX=3702 GN=AED1 PE=2 SV=1	0	2.064	2	1	1	1	1	464	49.4	5.06	2.07	1	0
High	Master Protein	P49205	40S ribosomal protein S17-1 OS=Arabidopsis thaliana OX=3702 GN=RPS17A PE=2 SV=3	0	2.057	9	1	1	1	1	141	16	10.04	2.11	1	0
High	Master Protein Candidate	Q9SQZ1	40S ribosomal protein S17-3 OS=Arabidopsis thaliana OX=3702 GN=RPS17C PE=2 SV=3	0	2.057	9	1	1	1	1	140	16	10.04	2.11	1	0
High	Master Protein Candidate	Q9SJ36	40S ribosomal protein S17-2 OS=Arabidopsis thaliana OX=3702 GN=RPS17B PE=2 SV=3	0	2.057	9	1	1	1	1	140	15.9	10.04	2.11	1	0
High	Master Protein Candidate	Q9LZ17	40S ribosomal protein S17-4 OS=Arabidopsis thaliana OX=3702 GN=RPS17D PE=2 SV=3	0	2.057	9	1	1	1	1	141	16	10.04	2.11	1	0
High	Master Protein Candidate	A0A178UT56	Proton pump interactor 1 OS=Arabidopsis thaliana OX=3702 GN=PPI1 PE=4 SV=1	0	2.055	2	1	1	1	1	535	60	8.82	2.07	1	0
High	Master Protein	O23144	Proton pump-interactor 1 OS=Arabidopsis thaliana OX=3702 GN=PPI1 PE=1 SV=2	0	2.055	2	1	1	1	1	612	68.8	9.03	2.07	1	0
High	Master Protein	Q9LEX1	At3g61050 OS=Arabidopsis thaliana OX=3702 GN=T27I15_140 PE=1 SV=1	0	2.037	4	1	1	1	1	510	55.1	8.21	0	1	0
High	Master Protein Candidate	Q8L4A7	Proteasome subunit alpha type-2-B OS=Arabidopsis thaliana OX=3702 GN=PAB2 PE=1 SV=1	0	2.037	6	1	1	1	1	235	25.7	5.69	2.28	1	0
High	Master Protein	O23708	Proteasome subunit alpha type-2-A OS=Arabidopsis thaliana OX=3702 GN=PAB1 PE=1 SV=1	0	2.037	6	1	1	1	1	235	25.7	5.69	2.28	1	0
High	Master Protein Candidate	Q9ZUC2	Beta carbonic anhydrase 3 OS=Arabidopsis thaliana OX=3702 GN=BCA3 PE=2 SV=1	0	2.015	4	1	1	1	1	258	28.8	6.98	3.21	1	0
High	Master Protein	Q94CE4	Beta carbonic anhydrase 4 OS=Arabidopsis thaliana OX=3702 GN=BCA4 PE=1 SV=1	0	2.015	4	1	1	1	1	280	30.8	7.09	3.21	1	0
High	None	Q9C525	Beta-glucosidase 21 OS=Arabidopsis thaliana OX=3702 GN=BGLU21 PE=1 SV=1	0	2.006	2	1	1	1	1	524	59.6	7.02	3.13	1	0
High	None	Q9C8Y9	Beta-glucosidase 22 OS=Arabidopsis thaliana OX=3702 GN=BGLU22 PE=1 SV=1	0	2.006	2	1	1	1	1	524	59.7	7.21	3.13	1	0
High	None	Q9SR37	Beta-glucosidase 23 OS=Arabidopsis thaliana OX=3702 GN=BGLU23 PE=1 SV=1	0	2.006	2	1	1	1	1	524	59.7	6.92	3.13	1	0
High	None	Q9LIF9	Beta-glucosidase 19 OS=Arabidopsis thaliana OX=3702 GN=BGLU19 PE=2 SV=1	0	2.006	2	1	1	1	1	527	60	6.65	3.13	1	0
High	None	Q9LKR7	Beta-glucosidase 24 OS=Arabidopsis thaliana OX=3702 GN=BGLU24 PE=2 SV=2	0	2.006	2	1	1	1	1	533	61	7.56	3.13	1	0
High	Master Protein	Q8L636	Sodium/calcium exchanger NCL OS=Arabidopsis thaliana OX=3702 GN=NCL PE=2 SV=1	0	2.002	2	1	1	1	1	585	63.4	5.34	2.17	1	0
High	Master Protein	Q8LDL0	Protein HHL1, chloroplastic OS=Arabidopsis thaliana OX=3702 GN=HHL1 PE=1 SV=1	0	1.967	8	1	1	1	1	231	26.1	9.57	0	1	0
High	Master Protein Candidate	B9DFR9	AT2G45960 protein OS=Arabidopsis thaliana OX=3702 GN=PIP1B PE=2 SV=1	0	1.965	4	1	1	1	1	274	29.1	8.85	3.28	1	0
High	Master Protein Candidate	Q06611	Aquaporin PIP1-2 OS=Arabidopsis thaliana OX=3702 GN=PIP1-2 PE=1 SV=1	0	1.965	3	1	1	1	1	286	30.6	9.03	3.28	1	0
High	Master Protein	A8MRW1	Plasma membrane intrinsic protein 1B OS=Arabidopsis thaliana OX=3702 GN=PIP1B PE=3 SV=1	0	1.965	3	1	1	1	1	301	32.4	8.51	3.28	1	0
High	None	Q9SMT4	Putative 60S ribosomal protein L13-2 OS=Arabidopsis thaliana OX=3702 GN=RPL13C PE=3 SV=1	0	1.952	7	2	2	2	1	206	23.5	10.55	1.64	2	0
High	Master Protein Candidate	F4I131	Protein NETWORKED 2B OS=Arabidopsis thaliana OX=3702 GN=NET2B PE=3 SV=1	0	1.943	2	1	1	1	1	928	106	5.44	0	1	0
High	Master Protein	F4IJK1	Protein NETWORKED 2D OS=Arabidopsis thaliana OX=3702 GN=NET2D PE=3 SV=1	0	1.943	2	1	1	1	1	947	108.1	5.1	0	1	0
High	Master Protein Candidate	P0DMS1	Protein NETWORKED 2A OS=Arabidopsis thaliana OX=3702 GN=NET2A PE=2 SV=1	0	1.943	2	1	1	1	1	947	108	5.4	0	1	0
High	Master Protein Candidate	B3H5Q0	Germin-like protein OS=Arabidopsis thaliana OX=3702 GN=GER2 PE=3 SV=1	0	1.941	8	1	1	1	1	200	21.3	6.37	0	1	0
High	Master Protein	P92996	Germin-like protein subfamily 1 member 20 OS=Arabidopsis thaliana OX=3702 GN=GLP5A PE=1 SV=1	0	1.941	7	1	1	1	1	222	23.9	7.03	0	1	0
High	Master Protein Candidate	F4KD16	Germin-like protein OS=Arabidopsis thaliana OX=3702 GN=At5g39160 PE=3 SV=1	0	1.941	8	1	1	1	1	200	21.3	6.37	0	1	0
High	Master Protein Candidate	Q9FIC8	Germin-like protein subfamily 1 member 16 OS=Arabidopsis thaliana OX=3702 GN=At5g39130 PE=2 SV=1	0	1.941	7	1	1	1	1	222	24	6.38	0	1	0
High	Master Protein Candidate	F4KD18	Germin-like protein OS=Arabidopsis thaliana OX=3702 GN=At5g39160 PE=3 SV=1	0	1.941	7	1	1	1	1	218	23.4	6.68	0	1	0
High	Master Protein Candidate	P92999	Germin-like protein subfamily 1 member 18 OS=Arabidopsis thaliana OX=3702 GN=GLP2A PE=2 SV=2	0	1.941	7	1	1	1	1	222	23.9	7.03	0	1	0
High	Master Protein	Q8W593	Probable lactoylglutathione lyase, chloroplastic OS=Arabidopsis thaliana OX=3702 GN=At1g67280 PE=1 SV=1	0	1.94	4	1	1	1	1	350	39.1	7.37	2.91	1	0
High	Master Protein	Q9SYL9	50S ribosomal protein L13, chloroplastic OS=Arabidopsis thaliana OX=3702 GN=RPL13 PE=2 SV=1	0	1.933	4	1	1	1	1	241	26.8	9.92	0	1	0
High	Master Protein Candidate	F4HRW5	Ribosomal protein L22p/L17e family protein OS=Arabidopsis thaliana OX=3702 GN=At1g67430 PE=3 SV=1	0	1.932	8	1	1	1	1	131	14.8	10.04	2.97	1	0
[truncated: 217 more rows]
